# Supplementary material for: The evolution of sex-biased gene expression in the Drosophila brain
Source: HighWire-hosted journal article supplement (doi:10.1101/gr.259069.119), 2020-06-01
Supplement: Supplementary_Figures_Tables.docx [file Supplementary_Figures_Tables.docx]

**Supplementary information for**

**The evolution of sex-biased gene expression in the *Drosophila* brain**

Authors: Samuel Khodursky1, #, Nicolas Svetec1, #, Sylvia M Durkin1, $, Li Zhao1, *

Affiliations: 1Laboratory of Evolutionary Genetics and Genomics, The Rockefeller University, New York, NY 10065, USA

#These authors contributed equally to this work.

$Current address: Department of Integrative Biology & Museum of Vertebrate Zoology, University of California, Berkeley, Berkeley, CA 94720, USA.

*Correspondence to: [lzhao@rockefeller.edu](mailto:lzhao@rockefeller.edu)

Table of contents

Supplementary Figure S1. Fold enrichment of sex-biased genes on the X Chromosome and autosomes – a comparison between various tissues and the brain.

Supplementary Figure S2. Expression levels of sex-biased genes in the *Drosophila* brain.

Supplementary Figure S3. Log2 fold-change and -Log10 q-value for genes with sex-biased expression in the *Drosophila* brain.

Supplementary Figure S4. Ratio of interspecific to intraspecific variability in expression for genes in the *Drosophila* brain.

Supplementary Figure S5. Marginal distributions of interspecific and intraspecific variability for genes in the *Drosophila* brain.

Supplementary Figure S6. Fold enrichment of genes with both low intraspecific and low interspecific variabilities.

Supplementary Figure S7. Ratio of interspecific to intraspecific variability in expression for genes with conserved sex-bias in all three species and genes with sex-bias in only one species.

Supplementary Figure S8. The minimum Hudson-Kreitman-Aguadé-like (HKAl) statistic value within 20 kb of each gene.

Supplementary Figure S9. Ratio of interspecific to intraspecific variability in expression for genes in the *Drosophila* brain while controlling for tissue specificity.

Supplementary Figure S10. Positive relationship between gene expression variability and tissue specificity.

Supplementary Figure S11. Tissue specificity of sex-biased genes.

Supplementary Figure S12. Fold enrichment of genes with both low intraspecific and low interspecific variabilities while controlling for tissue specificity.

Supplementary Figure S13. Changes in expression relative to ancestral for state for sex-biased genes.

Supplementary Figure S14. *d*N/*d*S of sex-biased and unbiased genes.

Supplementary Table S5. Test for faster-X expression evolution.

Supplementary Table S6. McDonald-Kreitman test on sex-biased genes.

Supplementary Table S7. Sample and library information.

**Supplementary Figure S1. Fold enrichment of sex-biased genes on the X Chromosome and autosomes – a comparison between various tissues and the brain.** A comparison of the number of observed vs. expected sex-biased genes between the brain and other tissues. Sex-biased genes in each tissue were found at a FDR of 0.05. P-values determined using a Chi-squared test followed by Benjamini-Hochberg correction. *****p-value < 1×10-5, ****p-value < 1×10-4, ***p-value < 1×10-3, **p-value < 1×10-2, *p-value < 5×10-2. Sex-biased genes are defined in each species at a FDR of 0.05.

**Supplementary Figure S2. Expression levels of sex-biased genes in the *Drosophila* brain.** Male-biased autosomal genes have higher expression levels than other classes of genes. ***p-value < 0.001. Two-sided Mann-Whitney *U* test. Expression levels were taken to be the median across all samples (both male and female) in each species. Sex-biased genes are defined in each species at a FDR of 0.05.

**Supplementary Figure S3. Log2 fold-change and -Log10 q-value for genes with sex-biased expression in the *Drosophila* brain.** Male-biased genes on the X chromosome display both significantly larger fold-change and significance than male-biased autosomal genes. However, female-biased genes on the X Chromosome generally do not display a larger fold change than autosomal genes, but they are more significant. This suggests that female-biased autosomal genes may have relatively noisy expression. P-values were calculated using two-sided Mann-Whitney *U* test. Sex-biased genes are defined in each species at a FDR of 0.05.

**Supplementary Figure S4. Ratio of interspecific to intraspecific variability in expression for genes in the *Drosophila* brain.** Same data shown as in Figure 4A but withvalues log-transformed and data shown in boxplot form.

**Supplementary Figure S5. Marginal distributions of interspecific and intraspecific variability for genes in the *Drosophila* brain.** A) Interspecific variability in gene expression, log(*MSspecies*). Female-biased autosomal and male-biased X Chromosome genes have relatively high interspecific variability in expression in both sexes. Male-biased autosomal genes have relatively low interspecific variability in expression in both sexes. B) Intraspecific variability in gene expression, log(*MSstrain*). Male-biased autosomal genes have relatively low intraspecific variability in expression in both sexes. Female-biased autosomal genes have relatively high intraspecific variability in expression in both sexes. Significance of medians relative to the genome-wide median is shown. P-values determined using 1 million simulations per gene-class and Benjamini-Hochberg correction. *****p-value < 1×10-5, ****p-value < 1×10-4, ***p-value < 1×10-3, **p-value < 1×10-2, *p-value < 5×10-2. Sex-biased genes defined in the same way as in Figure 4.

**Supplementary Figure S6. Fold enrichment of genes with both low intraspecific and low interspecific variabilities.** Genes with low interspecific and intraspecific variabilities were defined as genes with MSspecies and MSstrain both below the genome-wide medians. P-values were determined using a hypergeometric test followed by Benjamini-Hochberg correction. *****p-value < 1×10-5, ****p-value < 1×10-4, ***p-value < 1×10-3, **p-value < 1×10-2, *p-value < 5×10-2. Sex-biased genes defined in the same way as in Figure 4.

**Supplementary Figure S7. Ratio of interspecific to intraspecific variability in expression for genes with conserved sex-bias in all three species and genes with sex-bias in only one species.** The ratio of interspecific to intraspecific variability is similar for genes with conserved sex-bias in all three species and genes with sex-bias in only one species. Significance of medians relative to the genome-wide median is shown. P-values determined using 1 million simulations per group and Benjamini-Hochberg correction. *****p-value < 1×10-5, ****p-value < 1×10-4, ***p-value < 1×10-3, **p-value < 1×10-2, *p-value < 5×10-2. Sex-biased genes defined in the same way as in Figure 4.

**Supplementary Figure S8. The minimum Hudson-Kreitman-Aguadé-like (HKAl) statistic value within 20kb of each gene.** The statistic values only include flanking regions but not genes themselves. A) Comparison of sex-biased and unbiased genes on the X Chromosome and autosomes in *D. melanogaster*. Male-biased X Chromosome genes are flanked by regions with lower minimal HKAl, indicating that they are more likely to be evolving adaptively. B) Diverged genes located on the autosomes have significantly lower minimal HKAl within flanking regions than conserved genes. However, there is no clear pattern on the X chromosome. C) HKAl in flanking regions of diverged sex-biased and unbiased genes. Two-sided Mann-Whitney *U* test: *****p-value < 1×10-5, ****p-value < 1×10-4, ***p-value < 1×10-3, **p-value < 1×10-2, *p-value < 5×10-2.. Sex-biased genes are defined in *D. melanogaster* at a FDR of 0.05.

**Supplementary Figure S9. Ratio of interspecific to intraspecific variability in expression for genes in the *Drosophila* brain while controlling for tissue specificity.** A) Ratio of interspecific to intraspecific variability while controlling for tissue specificity, with tissue specificity defined in *D. melanogaster*. B) Ratio of interspecific to intraspecific variability, with tissue specificity defined in *D. yakuba*. Sex-biased genes defined in the same way as in Figure 4.

**Supplementary Figure S10. Positive relationship between gene expression variability and tissue specificity.** A) Relationship between interspecific variability and tissue specificity in males and females for *D. melanogaster* (I and II)and *D. yakuba* (III and IV). B) Relationship between intraspecific variability and tissue specificity in males and females for *D. melanogaster* (I and II)and *D. yakuba* (III and IV). Correlations shown are Spearman correlations. Lines are generalized additive model smoothing curves. Sex-biased genes defined in the same way as in Figure 4.

**Supplementary Figure S11. Tissue specificity of sex-biased genes.** A) Tissue specificity in *D. melanogaster* males. B) Tissue specificity in *D. melanogaster* females. C) Tissue specificity in *D. yakuba* males. D) Tissue specificity in *D. yakuba* females. Sex-biased genes defined in the same way as in Figure 4.

**Supplementary Figure S12. Fold enrichment of genes with both low intraspecific and low interspecific variabilities while controlling for tissue specificity.** A) Controlling for tissue specificity in *D. melanogaster*. B) Controlling for tissue specificity in D. *yakuba*. Genes with low interspecific and intraspecific variabilities were defined as genes with *MSspecies* and *MSstrain* both below the genome-wide medians. P-values were determined using a hypergeometric test followed by Benjamini-Hochberg correction. *****p-value < 1×10-5, ****p-value < 1×10-4, ***p-value < 1×10-3, **p-value < 1×10-2, *p-value < 5×10-2. Sex-biased genes defined in the same way as in Figure 4.

**Supplementary Figure S13. Changes in expression relative to ancestral for state for sex-biased genes.** A) The change in expression relative to ancestral state for sex-biased genes on the X Chromosome in the three *Drosophila* species. The ancestral expression levels were determined by maximizing the likelihood of a Brownian motion model on the phylogenetic tree. Ancestral states were calculated independently for males and females. The change in expression was defined as (current – ancestral)/abs(ancestral), where ‘current’ is the log2(TPM + 1) of the extant expression and ‘ancestral’ is the log2(TPM + 1) of the inferred ancestral expression. Then the Pearson correlation between changes in males and females were calculated. B) The change in expression relative to ancestral state for sex-biased genes located on the autosomes.

**Supplementary Figure S14. *d*N/*d*S of sex-biased and unbiased genes.** Male-biased autosomal genes have significantly lower *d*N/*d*S than female-biased and unbiased autosomal genes. Two-sided Mann-Whitney *U* test with Benjamini-Hochberg correction: ***p-value < 1×10-3, **p-value < 1×10-2, *p-value < 5×10-2. Sex-biased genes defined in *D. melanogaster* at a FDR of 0.05. Outliers were not included in the plots.

**Supplementary Table S5. Test for faster-X expression evolution.** Sex-biased genes located on the X Chromosome show a faster-X effect for gene expression evolution.*MSspecies/MSstrain* ratios were compared between genes located on the X Chromosome and all expressing genes located on the autosomes. Two-sided Mann-Whitney *U* test with Benjamini-Hochberg correction. Sex-biased genes defined in the same way as in Figure 4.

**Supplementary Table S6. McDonald-Kreitman test on sex-biased genes.** A) X Chromosome sex-biased genes show an enrichment of genes (relative to all genes) with evidence of positive selection. B) When compared to genes on their native chromosomes there is no longer an enrichment. Sex-biased genes defined in *D. melanogaster* at a FDR of 0.05.

**Supplementary Table S7. Sample and library information.**

| Sample | Bioproject accession | Organism | Strain | Age | Dev stage | Sex | Tissue | Replicate | Lane  number |
| --- | --- | --- | --- | --- | --- | --- | --- | --- | --- |
| R307_female_rep1_L1 | PRJNA553234 | *D. melanogaster* | RAL307 | 4-day-old | adult | female | brain | rep1_L1 | A |
| R307_female_rep2_L1 | PRJNA553234 | *D. melanogaster* | RAL307 | 4-day-old | adult | female | brain | rep2_L1 | A |
| R307_female_rep3_L1 | PRJNA553234 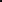 | *D. melanogaster* | RAL307 | 4-day-old | adult | female | brain | rep3_L1 | A |
| R357_female_rep1_L1 | PRJNA553234 | *D. melanogaster* | RAL357 | 4-day-old | adult | female | brain | rep1_L1 | A |
| R357_female_rep2_L1 | PRJNA553234 | *D. melanogaster* | RAL357 | 4-day-old | adult | female | brain | rep2_L1 | A |
| R357_female_rep3_L1 | PRJNA553234 | *D. melanogaster* | RAL357 | 4-day-old | adult | female | brain | rep3_L1 | A |
| w501_female_rep1_L1 | PRJNA553234 | *D. simulans* | w501 | 4-day-old | adult | female | brain | rep1_L1 | A |
| w501_female_rep2_L1 | PRJNA553234 | *D. simulans* | w501 | 4-day-old | adult | female | brain | rep2_L1 | A |
| w501_female_rep3_L1 | PRJNA553234 | *D. simulans* | w501 | 4-day-old | adult | female | brain | rep3_L1 | A |
| Ta18_female_rep1_L1 | PRJNA553234 | *D. yakuba* | Tai18E2 | 4-day-old | adult | female | brain | rep1_L1 | A |
| Ta18_female_rep2_L1 | PRJNA553234 | *D. yakuba* | Tai18E2 | 4-day-old | adult | female | brain | rep2_L1 | A |
| Ta18_female_rep3_L1 | PRJNA553234 | *D. yakuba* | Tai18E2 | 4-day-old | adult | female | brain | rep3_L1 | A |
| R399_female_rep1_L1 | PRJNA553234 | *D. melanogaster* | RAL399 | 4-day-old | adult | female | brain | rep1_L1 | B |
| R399_female_rep1_L2 | PRJNA553234 | *D. melanogaster* | RAL399 | 4-day-old | adult | female | brain | rep1_L2 | B |
| R399_female_rep2_L1 | PRJNA553234 | *D. melanogaster* | RAL399 | 4-day-old | adult | female | brain | rep2_L1 | B |
| R399_female_rep2_L2 | PRJNA553234 | *D. melanogaster* | RAL399 | 4-day-old | adult | female | brain | rep2_L2 | B |
| R399_female_rep3_L1 | PRJNA553234 | *D. melanogaster* | RAL399 | 4-day-old | adult | female | brain | rep3_L1 | B |
| R399_female_rep3_L2 | PRJNA553234 | *D. melanogaster* | RAL399 | 4-day-old | adult | female | brain | rep3_L2 | B |
| R517_female_rep1_L1 | PRJNA553234 | *D. melanogaster* | RAL517 | 4-day-old | adult | female | brain | rep1_L1 | B |
| R517_female_rep1_L2 | PRJNA553234 | *D. melanogaster* | RAL517 | 4-day-old | adult | female | brain | rep1_L2 | B |
| R517_female_rep2_L1 | PRJNA553234 | *D. melanogaster* | RAL517 | 4-day-old | adult | female | brain | rep2_L1 | B |
| R517_female_rep2_L2 | PRJNA553234 | *D. melanogaster* | RAL517 | 4-day-old | adult | female | brain | rep2_L2 | B |
| R517_female_rep3_L1 | PRJNA553234 | *D. melanogaster* | RAL517 | 4-day-old | adult | female | brain | rep3_L1 | B |
| R517_female_rep3_L2 | PRJNA553234 | *D. melanogaster* | RAL517 | 4-day-old | adult | female | brain | rep3_L2 | B |
| FA03_female_rep1_L1 | PRJNA553234 | *D. simulans* | FAIR3 | 4-day-old | adult | female | brain | rep1_L1 | B |
| FA03_female_rep1_L2 | PRJNA553234 | *D. simulans* | FAIR3 | 4-day-old | adult | female | brain | rep1_L2 | B |
| FA03_female_rep2_L1 | PRJNA553234 | *D. simulans* | FAIR3 | 4-day-old | adult | female | brain | rep2_L1 | B |
| FA03_female_rep2_L2 | PRJNA553234 | *D. simulans* | FAIR3 | 4-day-old | adult | female | brain | rep2_L2 | B |
| FA03_female_rep3_L1 | PRJNA553234 | *D. simulans* | FAIR3 | 4-day-old | adult | female | brain | rep3_L1 | B |
| FA03_female_rep3_L2 | PRJNA553234 | *D. simulans* | FAIR3 | 4-day-old | adult | female | brain | rep3_L2 | B |
| CY07_female_rep1_L1 | PRJNA553234 | *D. yakuba* | CY07 | 4-day-old | adult | female | brain | rep1_L1 | B |
| CY07_female_rep1_L2 | PRJNA553234 | *D. yakuba* | CY07 | 4-day-old | adult | female | brain | rep1_L2 | B |
| CY07_female_rep2_L1 | PRJNA553234 | *D. yakuba* | CY07 | 4-day-old | adult | female | brain | rep2_L1 | B |
| CY07_female_rep2_L2 | PRJNA553234 | *D. yakuba* | CY07 | 4-day-old | adult | female | brain | rep2_L2 | B |
| CY07_female_rep3_L2 | PRJNA553234 | *D. yakuba* | CY07 | 4-day-old | adult | female | brain | rep3_L2 | B |
| R304_female_rep1_L2 | PRJNA553234 | *D. melanogaster* | RAL304 | 4-day-old | adult | female | brain | rep1_L2 | C |
| R304_female_rep1_L3 | PRJNA553234 | *D. melanogaster* | RAL304 | 4-day-old | adult | female | brain | rep1_L3 | C |
| R304_female_rep2_L2 | PRJNA553234 | *D. melanogaster* | RAL304 | 4-day-old | adult | female | brain | rep2_L2 | C |
| R304_female_rep2_L3 | PRJNA553234 | *D. melanogaster* | RAL304 | 4-day-old | adult | female | brain | rep2_L3 | C |
| R304_female_rep3_L2 | PRJNA553234 | *D. melanogaster* | RAL304 | 4-day-old | adult | female | brain | rep3_L2 | C |
| R304_female_rep3_L3 | PRJNA553234 | *D. melanogaster* | RAL304 | 4-day-old | adult | female | brain | rep3_L3 | C |
| R360_female_rep1_L2 | PRJNA553234 | *D. melanogaster* | RAL360 | 4-day-old | adult | female | brain | rep1_L2 | C |
| R360_female_rep1_L3 | PRJNA553234 | *D. melanogaster* | RAL360 | 4-day-old | adult | female | brain | rep1_L3 | C |
| R360_female_rep2_L2 | PRJNA553234 | *D. melanogaster* | RAL360 | 4-day-old | adult | female | brain | rep2_L2 | C |
| R360_female_rep2_L3 | PRJNA553234 | *D. melanogaster* | RAL360 | 4-day-old | adult | female | brain | rep2_L3 | C |
| R360_female_rep3_L2 | PRJNA553234 | *D. melanogaster* | RAL360 | 4-day-old | adult | female | brain | rep3_L2 | C |
| R360_female_rep3_L3 | PRJNA553234 | *D. melanogaster* | RAL360 | 4-day-old | adult | female | brain | rep3_L3 | C |
| R304_male_rep1_L3 | PRJNA553234 | *D. melanogaster* | RAL304 | 4-day-old | adult | male | brain | rep1_L3 | C |
| R304_male_rep2_L2 | PRJNA553234 | *D. melanogaster* | RAL304 | 4-day-old | adult | male | brain | rep2_L2 | C |
| R304_male_rep2_L3 | PRJNA553234 | *D. melanogaster* | RAL304 | 4-day-old | adult | male | brain | rep2_L3 | C |
| R304_male_rep3_L3 | PRJNA553234 | *D. melanogaster* | RAL304 | 4-day-old | adult | male | brain | rep3_L3 | C |
| R360_male_rep1_L3 | PRJNA553234 | *D. melanogaster* | RAL360 | 4-day-old | adult | male | brain | rep1_L3 | C |
| R360_male_rep2_L2 | PRJNA553234 | *D. melanogaster* | RAL360 | 4-day-old | adult | male | brain | rep2_L2 | C |
| R360_male_rep2_L3 | PRJNA553234 | *D. melanogaster* | RAL360 | 4-day-old | adult | male | brain | rep2_L3 | C |
| R360_male_rep3_L2 | PRJNA553234 | *D. melanogaster* | RAL360 | 4-day-old | adult | male | brain | rep3_L2 | C |
| R360_male_rep3_L3 | PRJNA553234 | *D. melanogaster* | RAL360 | 4-day-old | adult | male | brain | rep3_L3 | C |
| R307_male_rep1_L4 | PRJNA553234 | *D. melanogaster* | RAL307 | 4-day-old | adult | male | brain | rep1_L4 | D |
| R307_male_rep2_L4 | PRJNA553234 | *D. melanogaster* | RAL307 | 4-day-old | adult | male | brain | rep2_L4 | D |
| R307_male_rep3_L4 | PRJNA553234 | *D. melanogaster* | RAL307 | 4-day-old | adult | male | brain | rep3_L4 | D |
| R357_male_rep1_L4 | PRJNA553234 | *D. melanogaster* | RAL357 | 4-day-old | adult | male | brain | rep1_L4 | D |
| R357_male_rep2_L4 | PRJNA553234 | *D. melanogaster* | RAL357 | 4-day-old | adult | male | brain | rep2_L4 | D |
| R357_male_rep3_L4 | PRJNA553234 | *D. melanogaster* | RAL357 | 4-day-old | adult | male | brain | rep3_L4 | D |
| w501_male_rep1_L4 | PRJNA553234 | *D. simulans* | w501 | 4-day-old | adult | male | brain | rep1_L4 | D |
| w501_male_rep2_L4 | PRJNA553234 | *D. simulans* | w501 | 4-day-old | adult | male | brain | rep2_L4 | D |
| w501_male_rep3_L4 | PRJNA553234 | *D. simulans* | w501 | 4-day-old | adult | male | brain | rep3_L4 | D |
| Ta18_male_rep1_L4 | PRJNA553234 | *D. yakuba* | Tai18E2 | 4-day-old | adult | male | brain | rep1_L4 | D |
| Ta18_male_rep2_L4 | PRJNA553234 | *D. yakuba* | Tai18E2 | 4-day-old | adult | male | brain | rep2_L4 | D |
| Ta18_male_rep3_L4 | PRJNA553234 | *D. yakuba* | Tai18E2 | 4-day-old | adult | male | brain | rep3_L4 | D |
| R399_male_rep1_L5 | PRJNA553234 | *D. melanogaster* | RAL399 | 4-day-old | adult | male | brain | rep1_L5 | E |
| R399_male_rep2_L5 | PRJNA553234 | *D. melanogaster* | RAL399 | 4-day-old | adult | male | brain | rep2_L5 | E |
| R399_male_rep3_L5 | PRJNA553234 | *D. melanogaster* | RAL399 | 4-day-old | adult | male | brain | rep3_L5 | E |
| R517_male_rep1_L5 | PRJNA553234 | *D. melanogaster* | RAL517 | 4-day-old | adult | male | brain | rep1_L5 | E |
| R517_male_rep2_L5 | PRJNA553234 | *D. melanogaster* | RAL517 | 4-day-old | adult | male | brain | rep2_L5 | E |
| R517_male_rep3_L5 | PRJNA553234 | *D. melanogaster* | RAL517 | 4-day-old | adult | male | brain | rep3_L5 | E |
| FA03_male_rep1_L5 | PRJNA553234 | *D. simulans* | FAIR3 | 4-day-old | adult | male | brain | rep1_L5 | E |
| FA03_male_rep2_L5 | PRJNA553234 | *D. simulans* | FAIR3 | 4-day-old | adult | male | brain | rep2_L5 | E |
| FA03_male_rep3_L5 | PRJNA553234 | *D. simulans* | FAIR3 | 4-day-old | adult | male | brain | rep3_L5 | E |
| CY07_male_rep1_L5 | PRJNA553234 | *D. yakuba* | CY07 | 4-day-old | adult | male | brain | rep1_L5 | E |
| CY07_male_rep2_L5 | PRJNA553234 | *D. yakuba* | CY07 | 4-day-old | adult | male | brain | rep2_L5 | E |
| CY07_male_rep3_L5 | PRJNA553234 | *D. yakuba* | CY07 | 4-day-old | adult | male | brain | rep3_L5 | E |
