# Supplementary material for: The evolution of sex-biased gene expression in the Drosophila brain
Source: HighWire-hosted journal article supplement (doi:10.1101/gr.259069.119), 2020-06-01
Supplement: Supplementary_Table_S1.xlsx [file Supplementary_Table_S1.xlsx]

## Sheet: Legend
Table S1. Sex-biased genes in D. melanogaster, D. simulans, and D. yakuba.
Column name	Description
gene_id	FlyBase ID
chrom	Chromosome arm
log2fc	Log2 fold change
qval	Adjusted p-value
sex	Sex-bias status (f: female; m: male)

## Sheet: Dmel
Sex-biased genes in D. melanogaster
gene_id	chrom	log2fc	qval	sex
FBgn0000028	X	-0.332102	0.00279002	f
FBgn0000042	X	0.129903	0.000148262	m
FBgn0000045	3L	0.72423	1.7859e-08	m
FBgn0000057	2R	0.100342	0.0179827	m
FBgn0000064	3R	0.123834	1.57653e-09	m
FBgn0000071	3R	-0.63519	0.00979165	f
FBgn0000084	X	-0.274329	0.000871581	f
FBgn0000152	X	0.54449	2.46672e-22	m
FBgn0000157	2R	-0.137697	0.0058742	f
FBgn0000163	X	0.1789	0.0421233	m
FBgn0000173	X	-0.231891	4.97882e-10	f
FBgn0000179	X	-0.191368	0.00107603	f
FBgn0000221	X	0.50086	9.19658e-16	m
FBgn0000257	X	0.383585	5.07194e-85	m
FBgn0000261	3L	-0.192974	0.0203008	f
FBgn0000303	3R	0.129406	0.00144535	m
FBgn0000316	X	-0.275286	1.41205e-22	f
FBgn0000330	X	-0.31631	8.59166e-16	f
FBgn0000346	X	0.18941	6.34515e-17	m
FBgn0000351	2L	-0.267251	0.0421485	f
FBgn0000376	X	-0.172143	0.0145775	f
FBgn0000394	X	-0.151868	0.0355209	f
FBgn0000404	3L	-0.22124	0.00984175	f
FBgn0000442	2L	-0.642247	1.10103e-09	f
FBgn0000459	X	-0.192152	0.0147213	f
FBgn0000473	2R	-0.220082	0.00022555	f
FBgn0000490	2L	-0.211347	0.0393926	f
FBgn0000504	3R	0.396006	0.000426562	m
FBgn0000520	X	0.112451	0.0246842	m
FBgn0000524	X	-0.199183	0.0316007	f
FBgn0000529	2L	-0.16401	0.0024128	f
FBgn0000542	X	0.90705	3.88921e-10	m
FBgn0000551	3L	-0.364097	0.033399	f
FBgn0000557	3R	0.0736867	0.0433854	m
FBgn0000564	3R	-1.69002	0.0346688	f
FBgn0000615	2R	-0.687862	0.0402813	f
FBgn0000644	X	0.906204	1.39634e-17	m
FBgn0000667	X	0.214108	0.000315582	m
FBgn0000711	X	0.15661	8.3348e-05	m
FBgn0000721	2L	-0.23208	4.39655e-05	f
FBgn0000808	X	2.32301	8.52219e-07	m
FBgn0000826	X	3.43438	2.23105e-61	m
FBgn0000927	X	3.07965	4.84721e-10	m
FBgn0000928	X	3.16114	4.87841e-34	m
FBgn0001079	X	0.105323	0.00314297	m
FBgn0001105	X	-0.180697	6.28961e-05	f
FBgn0001108	3L	0.0807255	0.0353938	m
FBgn0001114	2L	-1.20412	1.12616e-08	f
FBgn0001142	2L	0.0974367	0.00762283	m
FBgn0001145	X	0.182136	2.77381e-05	m
FBgn0001149	3R	-0.220609	0.00502563	f
FBgn0001187	2R	-0.353017	0.0323466	f
FBgn0001206	X	0.293679	3.55532e-06	m
FBgn0001208	3L	-0.756202	0.00151404	f
FBgn0001218	X	0.262364	5.76718e-09	m
FBgn0001220	2R	0.171816	6.85367e-10	m
FBgn0001229	3L	-0.167468	0.0264963	f
FBgn0001247	3L	0.0726661	0.00253284	m
FBgn0001258	3L	0.44574	0.0124766	m
FBgn0001296	3R	-0.145473	0.00509044	f
FBgn0001297	3R	0.119833	0.017951	m
FBgn0001308	2R	0.1225	0.000505347	m
FBgn0001330	X	0.379159	1.91214e-10	m
FBgn0001341	X	0.50536	8.16149e-34	m
FBgn0001404	X	-0.139773	0.046429	f
FBgn0001491	X	-0.155451	0.0156723	f
FBgn0001970	2L	0.170782	0.000607415	m
FBgn0001987	2L	0.336907	0.000103382	m
FBgn0001994	2L	-0.130427	0.014237	f
FBgn0002174	2R	0.174555	0.000974609	m
FBgn0002524	2L	0.183563	1.47061e-15	m
FBgn0002526	3L	-0.482557	0.00799395	f
FBgn0002565	3L	-2.18033	9.95136e-05	f
FBgn0002570	2R	-2.3745	0.0192841	f
FBgn0002576	X	-0.414488	3.0994e-05	f
FBgn0002593	2L	-0.222036	0.0147538	f
FBgn0002632	3R	-0.950906	0.00150537	f
FBgn0002641	X	0.373758	7.97468e-15	m
FBgn0002707	X	-0.150973	0.0269841	f
FBgn0002709	X	-0.362887	0.0203139	f
FBgn0002733	3R	-0.313372	0.012976	f
FBgn0002781	3R	-0.220244	0.00181235	f
FBgn0002869	3R	0.941174	0.0246192	m
FBgn0002878	X	0.321007	9.12783e-08	m
FBgn0002891	2R	0.406838	2.18072e-08	m
FBgn0002899	3L	0.361882	0.00412977	m
FBgn0002905	3R	0.288297	8.9382e-05	m
FBgn0002948	X	3.04522	4.37755e-288	m
FBgn0003028	X	-0.42608	0.000148912	f
FBgn0003071	2R	0.113704	0.00221827	m
FBgn0003116	X	0.178901	0.000412891	m
FBgn0003117	3R	-1.07572	0.00184674	f
FBgn0003137	3R	-1.27347	3.40959e-10	f
FBgn0003189	X	0.532266	1.2136e-14	m
FBgn0003204	X	-0.0879915	0.016114	f
FBgn0003209	2L	0.108806	0.00522643	m
FBgn0003231	2L	-0.0615404	0.0170743	f
FBgn0003300	X	-0.246531	5.14612e-05	f
FBgn0003302	X	-0.204095	1.99271e-05	f
FBgn0003310	2L	0.181634	0.0397272	m
FBgn0003321	X	-0.171932	0.00063897	f
FBgn0003326	2R	0.165066	1.74512e-05	m
FBgn0003328	2R	0.238934	0.0115793	m
FBgn0003339	3R	0.220326	0.0276157	m
FBgn0003360	X	0.202174	2.08153e-05	m
FBgn0003390	X	-0.291861	0.000251842	f
FBgn0003416	X	0.179894	0.0447615	m
FBgn0003423	X	0.15222	1.00137e-10	m
FBgn0003447	X	0.51306	7.37748e-32	m
FBgn0003479	3R	0.20619	0.0417298	m
FBgn0003499	3R	0.65915	1.18273e-07	m
FBgn0003507	3R	-0.930183	2.26976e-05	f
FBgn0003525	3R	-0.952229	0.00114933	f
FBgn0003557	2L	0.123709	0.0058418	m
FBgn0003654	X	-0.131204	1.07119e-05	f
FBgn0003701	2R	0.374468	0.025066	m
FBgn0003716	2L	0.117538	0.031173	m
FBgn0003741	3L	-0.249277	6.95853e-09	f
FBgn0003744	3L	0.136251	1.65282e-09	m
FBgn0003922	2L	0.57717	0.0103981	m
FBgn0003930	2L	0.585693	0.0365118	m
FBgn0003938	3L	1.42794	0.0432699	m
FBgn0003950	X	-0.410016	3.08862e-05	f
FBgn0003964	X	-0.108374	0.00531406	f
FBgn0003965	X	-0.499909	0.02626	f
FBgn0003996	X	1.28078	8.0663e-17	m
FBgn0003997	3L	-0.167304	0.0411284	f
FBgn0004034	X	-2.27992	3.55942e-32	f
FBgn0004045	X	-7.5638	4.99184e-175	f
FBgn0004047	X	-7.2052	5.02155e-131	f
FBgn0004050	X	-0.131811	1.08186e-05	f
FBgn0004055	2R	0.165271	6.84768e-10	m
FBgn0004118	3R	-0.151521	0.00063897	f
FBgn0004187	3R	1.21944	0.0494773	m
FBgn0004190	3R	1.13097	0.0183581	m
FBgn0004191	2L	0.684461	0.0450695	m
FBgn0004192	2L	0.542579	0.0104456	m
FBgn0004197	3R	-1.01723	0.00917933	f
FBgn0004198	X	-0.380381	1.97839e-05	f
FBgn0004362	2R	-0.177357	2.9824e-05	f
FBgn0004364	2R	0.182511	0.0198447	m
FBgn0004367	X	0.482877	1.12518e-09	m
FBgn0004370	X	0.287583	0.0227723	m
FBgn0004380	3L	0.0831552	0.00106093	m
FBgn0004391	X	0.211718	0.0132577	m
FBgn0004456	X	0.517447	1.36643e-15	m
FBgn0004507	2L	0.0941177	0.0484287	m
FBgn0004510	3R	-0.158279	4.26767e-05	f
FBgn0004513	3L	-0.297164	4.33136e-05	f
FBgn0004516	3L	0.237972	2.50688e-09	m
FBgn0004569	3L	0.355472	0.0168575	m
FBgn0004574	3L	0.152662	3.88691e-15	m
FBgn0004606	3R	0.260828	0.0456608	m
FBgn0004622	3R	-0.158812	0.000447764	f
FBgn0004635	3L	0.362738	1.90496e-06	m
FBgn0004647	X	-0.376477	2.33227e-05	f
FBgn0004652	3R	-1.04189	9.21866e-29	f
FBgn0004828	X	-0.344655	2.45679e-18	f
FBgn0004832	X	0.28176	3.34794e-06	m
FBgn0004841	3R	-0.224701	7.08509e-06	f
FBgn0004854	X	-0.262138	0.0294899	f
FBgn0004893	2L	0.278934	0.0303962	m
FBgn0004919	2R	0.161548	0.0215102	m
FBgn0004924	X	0.239868	0.030194	m
FBgn0005390	X	-1.43379	7.85574e-36	f
FBgn0005391	X	-7.59747	8.93847e-185	f
FBgn0005427	X	-0.277782	0.00117749	f
FBgn0005616	2L	0.468827	2.76832e-16	m
FBgn0005626	3L	0.203976	0.00795347	m
FBgn0005633	3L	0.242381	0.0221465	m
FBgn0005642	3R	-0.176941	1.38358e-05	f
FBgn0005660	2L	0.685531	0.0320668	m
FBgn0005695	2R	-0.0874226	0.00477335	f
FBgn0005778	2R	0.26905	0.0391062	m
FBgn0010014	X	-0.105556	0.0254875	f
FBgn0010038	3R	-0.492348	0.029347	f
FBgn0010053	2R	-0.316633	1.06978e-06	f
FBgn0010100	2L	0.159735	1.98862e-08	m
FBgn0010173	3R	0.111755	8.72188e-06	m
FBgn0010197	2L	-0.293947	0.0340504	f
FBgn0010217	4	0.133273	0.00286782	m
FBgn0010225	3R	-0.193833	0.000160767	f
FBgn0010240	X	-0.130202	3.0314e-07	f
FBgn0010246	3L	-1.86071	3.97391e-12	f
FBgn0010292	X	0.443411	1.70973e-27	m
FBgn0010315	X	-0.362763	6.65729e-08	f
FBgn0010316	2R	-0.207088	0.0362732	f
FBgn0010317	3L	-0.254874	5.31958e-06	f
FBgn0010350	3L	0.0856967	0.0101008	m
FBgn0010352	3L	0.165421	0.0376646	m
FBgn0010383	X	-1.01886	1.98252e-21	f
FBgn0010399	3R	0.142306	0.00696982	m
FBgn0010414	2R	0.200896	0.0079692	m
FBgn0010416	X	-0.128787	0.00484399	f
FBgn0010417	3L	-0.0875299	0.0404284	f
FBgn0010424	3L	-0.786794	0.00768855	f
FBgn0010504	2R	-0.273524	0.0115545	f
FBgn0010548	2R	-0.0664053	0.0293414	f
FBgn0010591	2R	0.0919619	0.00563421	m
FBgn0010607	2L	-0.492184	1.4244e-21	f
FBgn0010651	2R	-0.318628	0.00846133	f
FBgn0010741	3L	0.14603	0.0376419	m
FBgn0011204	3L	0.0763799	0.0226294	m
FBgn0011211	2R	0.188656	3.0994e-05	m
FBgn0011225	3R	0.129199	0.0215782	m
FBgn0011227	2R	0.247646	0.007753	m
FBgn0011276	X	-0.485879	5.05618e-11	f
FBgn0011277	X	-0.343166	0.000255031	f
FBgn0011297	2R	-0.207203	0.00473438	f
FBgn0011576	X	2.20167	6.58668e-107	m
FBgn0011581	3R	-0.231163	1.79438e-05	f
FBgn0011604	2R	0.077082	0.0499004	m
FBgn0011606	X	0.957961	2.11291e-17	m
FBgn0011661	X	0.121294	0.000116735	m
FBgn0011705	2L	-1.17575	1.36841e-13	f
FBgn0011706	3L	-0.355246	3.65988e-07	f
FBgn0011723	3L	-0.289389	0.00410685	f
FBgn0011737	2L	-0.062933	0.0258221	f
FBgn0011746	2R	-0.249002	0.0020396	f
FBgn0011754	X	0.0857386	0.00129167	m
FBgn0011761	X	-3.051	4.52045e-05	f
FBgn0011762	3L	-0.604356	2.80355e-10	f
FBgn0011802	3L	0.165005	0.0347419	m
FBgn0011824	2R	-0.178734	0.0483744	f
FBgn0011828	3L	0.172583	0.000974609	m
FBgn0011837	X	-0.180533	0.023755	f
FBgn0012034	3L	0.118159	8.21861e-07	m
FBgn0012344	3R	-0.187587	0.0250082	f
FBgn0013272	2R	-0.138962	0.00192032	f
FBgn0013307	2R	-1.21819	1.94601e-09	f
FBgn0013673	mitochondrion_genome	0.497465	1.28008e-09	m
FBgn0013674	mitochondrion_genome	0.21779	0.00764888	m
FBgn0013680	mitochondrion_genome	0.315263	0.0292436	m
FBgn0013683	mitochondrion_genome	0.313377	0.00461382	m
FBgn0013687	mitochondrion_genome	-0.574588	0.0192225	f
FBgn0013690	mitochondrion_genome	-0.56679	0.0131121	f
FBgn0013691	mitochondrion_genome	-0.587616	0.000722509	f
FBgn0013695	mitochondrion_genome	0.544977	1.70853e-06	m
FBgn0013698	mitochondrion_genome	-0.341047	0.00315119	f
FBgn0013699	mitochondrion_genome	-0.436428	0.000262052	f
FBgn0013710	mitochondrion_genome	-0.497832	0.0182182	f
FBgn0013718	3L	0.154014	0.041925	m
FBgn0013720	X	-0.126216	0.0294899	f
FBgn0013725	2R	0.111384	0.00131811	m
FBgn0013726	2R	0.0666068	0.00943302	m
FBgn0013751	3L	0.157285	0.00257456	m
FBgn0013763	2R	-0.870812	0.000186852	f
FBgn0013764	2R	-0.104228	0.0182542	f
FBgn0013767	3R	-0.189939	0.0332703	f
FBgn0013770	2R	-0.161057	0.0139132	f
FBgn0013811	3L	-0.757914	1.40417e-05	f
FBgn0013987	X	-0.141957	1.62029e-10	f
FBgn0013997	3L	0.114379	0.0352904	m
FBgn0014024	X	-0.141124	0.0234029	f
FBgn0014031	X	-1.12933	1.03343e-06	f
FBgn0014032	X	0.200441	0.0137262	m
FBgn0014033	2L	-1.12243	1.62837e-07	f
FBgn0014092	2L	0.11826	0.0243039	m
FBgn0014141	3R	0.477634	9.20401e-08	m
FBgn0014143	3L	0.140759	0.0431367	m
FBgn0014163	3L	-0.147174	0.00393252	f
FBgn0014340	X	0.171903	0.00195336	m
FBgn0014388	3L	0.154199	0.00127746	m
FBgn0014411	X	0.0976721	0.00829221	m
FBgn0014427	3R	-0.511439	5.75205e-05	f
FBgn0014464	X	-1.09141	4.71177e-33	f
FBgn0014465	X	-1.22273	1.29542e-22	f
FBgn0014466	X	-1.49432	2.83368e-09	f
FBgn0014859	2L	1.47522	1.6911e-07	m
FBgn0014863	3R	-0.633527	2.00853e-06	f
FBgn0014868	X	0.318887	4.66314e-05	m
FBgn0014931	3R	-0.454647	0.00138534	f
FBgn0015036	X	0.67651	5.56866e-33	m
FBgn0015221	3R	-0.196262	2.6523e-08	f
FBgn0015239	3L	0.0909582	0.0194233	m
FBgn0015245	X	0.206592	0.000555139	m
FBgn0015270	3R	0.540162	0.00151946	m
FBgn0015277	2R	-0.0871505	0.0377602	f
FBgn0015288	X	-0.226202	4.64269e-07	f
FBgn0015372	2R	-0.12264	0.000244997	f
FBgn0015396	3R	-0.32735	0.00357153	f
FBgn0015519	X	-0.32338	5.27329e-05	f
FBgn0015522	2R	-0.755058	3.64415e-15	f
FBgn0015524	2R	0.195484	0.0324718	m
FBgn0015570	3R	-0.919098	4.38165e-07	f
FBgn0015577	3R	-0.190241	1.74272e-07	f
FBgn0015591	3R	-0.0895306	0.0465705	f
FBgn0015614	2R	-0.0951898	0.0158603	f
FBgn0015664	2L	0.148338	0.0138299	m
FBgn0015766	3L	-0.0639861	0.0216609	f
FBgn0015777	2L	0.0896844	0.0217373	m
FBgn0015781	3R	0.132277	0.0435657	m
FBgn0015789	X	-0.1437	7.79839e-05	f
FBgn0015797	2L	0.11134	0.0140406	m
FBgn0015801	2R	-0.354301	0.00198321	f
FBgn0015805	3L	0.145926	0.0142738	m
FBgn0015818	X	0.271552	6.70777e-11	m
FBgn0015925	2R	0.102322	0.0395609	m
FBgn0015926	X	2.00843	0.00460315	m
FBgn0015946	3L	-0.396692	5.69462e-05	f
FBgn0016032	2R	-0.207846	0.0251112	f
FBgn0016038	X	-0.374415	2.46486e-14	f
FBgn0016041	X	0.115166	0.00139077	m
FBgn0016080	X	0.631819	3.4352e-11	m
FBgn0016081	3L	0.213371	0.0173008	m
FBgn0016122	2L	-0.335546	1.57743e-07	f
FBgn0016131	2R	-0.282843	0.000106209	f
FBgn0016650	3R	-0.257074	5.81455e-07	f
FBgn0016685	3R	-0.170993	0.0488836	f
FBgn0016691	3R	0.189682	0.0490247	m
FBgn0016696	3L	-0.187025	0.00229859	f
FBgn0016974	X	1.02288	8.10716e-06	m
FBgn0016976	X	0.351431	0.0011264	m
FBgn0016983	3L	-0.0655851	0.0205067	f
FBgn0017566	X	0.19428	5.05689e-05	m
FBgn0017567	3R	0.182793	0.00533659	m
FBgn0017572	3L	0.0822688	0.0154051	m
FBgn0017577	3R	0.334969	0.0209683	m
FBgn0019624	3R	0.208765	0.0383035	m
FBgn0019660	X	6.94464	9.59857e-157	m
FBgn0019960	3R	0.160167	5.69855e-09	m
FBgn0019990	3R	0.13742	0.0291244	m
FBgn0020235	3R	0.180959	0.010261	m
FBgn0020249	3R	-0.0964611	0.0208032	f
FBgn0020251	3L	0.194256	0.0203008	m
FBgn0020272	X	0.660737	2.08844e-17	m
FBgn0020312	2R	-0.630573	6.74011e-07	f
FBgn0020378	X	-0.304164	3.30752e-07	f
FBgn0020381	X	0.420409	9.36361e-10	m
FBgn0020385	3R	-0.47885	0.0129419	f
FBgn0020415	2L	-0.505647	0.000432487	f
FBgn0020416	2L	-1.00444	0.000146774	f
FBgn0020616	2L	-0.0841826	0.0016595	f
FBgn0020617	2R	0.155691	0.0075207	m
FBgn0020618	2L	-0.182044	0.0453006	f
FBgn0020622	2L	0.254021	0.000724472	m
FBgn0020653	X	0.135001	0.00502734	m
FBgn0020909	X	0.155667	0.0153219	m
FBgn0021738	X	0.797547	1.48353e-11	m
FBgn0021742	X	-0.57827	9.60669e-05	f
FBgn0021768	3L	0.148815	0.0059772	m
FBgn0021796	2L	0.157491	0.0494974	m
FBgn0021847	2R	0.0640404	0.0111802	m
FBgn0021895	2R	-0.111664	0.0126759	f
FBgn0022359	3R	-0.390573	9.83858e-07	f
FBgn0022702	3L	-3.24642	6.18275e-252	f
FBgn0022768	X	-0.204493	0.00163837	f
FBgn0022772	2R	-0.426408	0.00773054	f
FBgn0022774	3L	-0.401417	1.17168e-05	f
FBgn0022786	X	0.211793	1.75298e-06	m
FBgn0022959	3L	-0.0985529	0.00998425	f
FBgn0023095	3L	0.191135	0.0317418	m
FBgn0023129	3L	-0.436459	7.044e-10	f
FBgn0023130	X	0.10222	0.0198896	m
FBgn0023143	2R	0.105746	0.0292129	m
FBgn0023167	2R	-0.174638	0.0238503	f
FBgn0023216	X	-0.153858	2.88361e-06	f
FBgn0023407	2L	-0.266851	0.0147213	f
FBgn0023506	X	-0.347276	3.01329e-16	f
FBgn0023508	X	0.114032	0.0169394	m
FBgn0023510	X	0.24743	0.00411031	m
FBgn0023512	X	0.236446	9.47761e-15	m
FBgn0023513	X	0.693967	3.56764e-30	m
FBgn0023515	X	1.05132	3.05588e-40	m
FBgn0023519	X	0.492747	2.81723e-18	m
FBgn0023521	X	-0.284566	0.000440704	f
FBgn0023522	X	-0.124982	0.000859438	f
FBgn0023526	X	-0.121577	0.0293686	f
FBgn0023527	X	0.121855	0.0218278	m
FBgn0023529	X	0.207897	3.0314e-07	m
FBgn0023534	X	-0.191813	0.00473405	f
FBgn0023535	X	-1.17412	3.96875e-14	f
FBgn0023537	X	-0.231824	1.33129e-05	f
FBgn0023540	X	1.06277	6.47865e-23	m
FBgn0023541	X	2.29802	6.80608e-66	m
FBgn0023542	X	0.127149	0.00477335	m
FBgn0023549	X	-0.490286	1.42917e-12	f
FBgn0024183	2L	0.152066	0.022092	m
FBgn0024222	3R	0.160207	0.0263255	m
FBgn0024234	2R	-0.155536	0.0188977	f
FBgn0024238	X	-0.172443	3.88921e-10	f
FBgn0024244	2L	0.523432	9.09948e-08	m
FBgn0024251	X	0.0887148	0.0296311	m
FBgn0024315	2R	-0.2253	7.32103e-09	f
FBgn0024352	2L	0.164539	0.0212554	m
FBgn0024360	X	0.253221	1.12616e-08	m
FBgn0024361	X	0.544685	9.29085e-05	m
FBgn0024362	X	0.0803433	0.0269116	m
FBgn0024364	X	0.44386	5.59644e-21	m
FBgn0024365	X	0.237852	3.69329e-06	m
FBgn0024556	2R	0.230332	1.38713e-05	m
FBgn0024698	2R	0.106764	0.00915481	m
FBgn0024732	2R	-0.2278	9.91717e-14	f
FBgn0024897	X	-0.888722	0.0273455	f
FBgn0024958	3R	0.0968249	0.0316388	m
FBgn0024973	X	-0.221065	1.21692e-07	f
FBgn0024975	X	0.120354	0.0224894	m
FBgn0024983	X	0.771446	7.76073e-76	m
FBgn0024987	X	0.341802	0.00221403	m
FBgn0024991	X	0.8124	4.41868e-25	m
FBgn0024995	X	0.268159	0.00132055	m
FBgn0024997	X	1.01643	1.74158e-12	m
FBgn0025111	X	-1.31268	2.27468e-59	f
FBgn0025185	2R	-0.121135	0.0118354	f
FBgn0025382	X	-0.275428	0.000264024	f
FBgn0025388	X	0.401815	1.07546e-07	m
FBgn0025391	X	-0.273751	8.49837e-05	f
FBgn0025393	X	-0.409577	0.0210823	f
FBgn0025454	2R	-0.690026	0.0140156	f
FBgn0025456	3R	-0.229278	0.0282591	f
FBgn0025463	X	-0.318169	1.76375e-13	f
FBgn0025549	X	-0.15508	0.00209769	f
FBgn0025583	2R	-0.775714	0.0354203	f
FBgn0025592	3L	-0.112524	0.00835852	f
FBgn0025595	2L	-0.862485	1.8261e-05	f
FBgn0025615	X	0.209404	0.00170306	m
FBgn0025620	X	-1.10527	1.51202e-12	f
FBgn0025624	X	0.274567	0.000331951	m
FBgn0025625	X	0.131702	0.012107	m
FBgn0025627	X	0.895913	8.44908e-08	m
FBgn0025628	X	0.446179	1.29009e-23	m
FBgn0025631	X	0.375839	1.63162e-10	m
FBgn0025632	X	0.474619	1.6244e-62	m
FBgn0025635	X	0.199821	0.000591916	m
FBgn0025637	X	-0.147777	0.0210114	f
FBgn0025693	2R	0.128871	0.0394152	m
FBgn0025739	X	0.826199	0.000487482	m
FBgn0025743	X	0.0853869	0.0250519	m
FBgn0025814	X	-0.217993	0.0177704	f
FBgn0025815	X	0.636385	5.92401e-16	m
FBgn0025835	X	0.674482	1.35212e-06	m
FBgn0025839	X	0.264607	0.00424895	m
FBgn0025866	3L	0.131784	0.000192154	m
FBgn0025878	2R	0.167598	0.0340576	m
FBgn0025885	2R	-0.139877	0.0473935	f
FBgn0026080	X	-0.21461	2.49813e-10	f
FBgn0026084	X	-0.292415	0.00178081	f
FBgn0026085	X	1.21601	2.94727e-11	m
FBgn0026089	X	0.356135	6.206e-06	m
FBgn0026148	2L	-0.127229	0.00768904	f
FBgn0026149	X	-0.160274	0.00030967	f
FBgn0026160	3L	-0.113908	0.048864	f
FBgn0026192	X	-0.149145	0.0118816	f
FBgn0026206	X	-0.500983	0.039012	f
FBgn0026257	3R	0.16991	0.0457612	m
FBgn0026315	3R	-0.214273	0.0273202	f
FBgn0026323	X	-0.0967586	0.0125085	f
FBgn0026374	X	-0.134232	0.0283605	f
FBgn0026402	2R	-0.138299	0.00387821	f
FBgn0026403	2R	-2.57427	6.98003e-45	f
FBgn0026409	3L	0.208288	3.01812e-11	m
FBgn0026411	X	-0.147956	3.23635e-05	f
FBgn0026415	X	-0.278159	0.0172307	f
FBgn0026428	X	-0.248892	1.50076e-10	f
FBgn0026433	X	0.128457	0.0168652	m
FBgn0026438	2L	0.164606	0.000450089	m
FBgn0026439	2L	0.139117	1.19516e-06	m
FBgn0026562	3R	-0.246538	0.0140156	f
FBgn0026565	3R	-2.47458	2.79088e-05	f
FBgn0026576	3R	-0.203742	0.00510736	f
FBgn0026582	2R	-0.126607	0.00921829	f
FBgn0026592	3L	0.107375	0.0284556	m
FBgn0026679	X	0.174968	1.69542e-07	m
FBgn0026702	X	1.65979	6.62237e-59	m
FBgn0026721	2R	-0.287978	1.89119e-05	f
FBgn0026749	X	0.109759	0.0199107	m
FBgn0026751	X	0.473607	7.38576e-44	m
FBgn0026761	2R	0.184403	7.78767e-08	m
FBgn0026787	2L	0.127783	0.00011309	m
FBgn0026873	X	0.179275	0.0276149	m
FBgn0026876	X	0.896689	2.92447e-29	m
FBgn0027055	3L	-0.129357	4.64332e-06	f
FBgn0027073	2R	-0.319376	5.52481e-09	f
FBgn0027081	2L	0.106388	0.00701077	m
FBgn0027085	3L	0.115851	0.00574172	m
FBgn0027106	X	-2.07641	7.31074e-154	f
FBgn0027259	X	0.612918	3.28974e-05	m
FBgn0027280	X	0.0790047	0.00549564	m
FBgn0027291	X	0.154073	2.10521e-11	m
FBgn0027296	X	-0.443403	1.47286e-70	f
FBgn0027329	X	0.386037	5.25608e-17	m
FBgn0027330	X	0.794674	2.40519e-48	m
FBgn0027348	2L	-0.747055	1.45827e-08	f
FBgn0027358	X	0.26192	0.0316388	m
FBgn0027509	2L	0.123884	0.0098799	m
FBgn0027521	X	1.88915	2.6693e-06	m
FBgn0027527	3R	2.84546	0.0133371	m
FBgn0027528	X	-0.174132	1.03885e-05	f
FBgn0027537	X	0.269105	1.26825e-08	m
FBgn0027546	X	-0.216184	3.48321e-13	f
FBgn0027547	3L	-0.125534	0.0109493	f
FBgn0027548	2R	0.195458	3.34424e-07	m
FBgn0027560	2L	-0.939356	8.41652e-05	f
FBgn0027562	3R	-0.673138	0.0325095	f
FBgn0027565	3L	-0.113243	0.00262294	f
FBgn0027568	2L	0.112158	0.00277168	m
FBgn0027569	3L	-0.0819881	0.0160472	f
FBgn0027578	3R	-0.680854	0.00508347	f
FBgn0027582	2L	0.115865	0.0473809	m
FBgn0027585	2R	0.293871	0.000505652	m
FBgn0027588	X	-0.158147	1.1798e-05	f
FBgn0027601	X	-0.136689	0.0137686	f
FBgn0027602	X	-0.316104	4.02261e-12	f
FBgn0027607	2R	0.0865331	0.0210883	m
FBgn0027608	3R	-0.0784757	0.011245	f
FBgn0027615	3L	0.138662	0.000403924	m
FBgn0027621	X	-0.182774	0.0232491	f
FBgn0027657	3R	-0.125573	0.0124766	f
FBgn0027779	2L	0.150501	7.08281e-11	m
FBgn0027791	X	0.266666	0.000128408	m
FBgn0027793	X	1.55121	2.72853e-26	m
FBgn0027794	X	0.392958	5.70332e-27	m
FBgn0027795	X	0.736645	3.26656e-44	m
FBgn0027843	3L	-0.502831	3.07924e-06	f
FBgn0027864	X	-0.356276	8.95153e-17	f
FBgn0027929	2L	-0.730855	0.028576	f
FBgn0027950	3R	-0.10117	0.00630844	f
FBgn0028325	X	-0.133929	0.000211422	f
FBgn0028327	X	-0.264754	5.97307e-09	f
FBgn0028343	X	-0.0939686	0.00707151	f
FBgn0028360	X	-0.175928	0.0063723	f
FBgn0028369	X	-0.145069	0.000202141	f
FBgn0028387	2L	-0.106922	0.00473405	f
FBgn0028418	3L	-0.266945	0.0265407	f
FBgn0028426	2R	0.13821	0.0318533	m
FBgn0028467	2L	0.101237	0.00489777	m
FBgn0028473	2R	-0.138262	0.000244066	f
FBgn0028474	X	0.175268	9.10217e-09	m
FBgn0028487	3R	-0.110775	0.000453414	f
FBgn0028542	2L	-0.374316	1.90149e-05	f
FBgn0028543	2L	-0.792106	0.000436337	f
FBgn0028572	2L	0.116016	0.00369441	m
FBgn0028669	2R	-1.59056	0.0111802	f
FBgn0028675	2L	-0.41853	0.000197698	f
FBgn0028746	X	-0.560609	5.84386e-28	f
FBgn0028833	3R	0.162931	0.0479705	m
FBgn0028886	2L	-0.797853	9.47665e-21	f
FBgn0028887	2L	-0.61336	0.0357147	f
FBgn0028899	2L	-0.536361	0.000974609	f
FBgn0028916	2L	0.112761	7.5354e-06	m
FBgn0028936	2L	-0.634295	5.66026e-06	f
FBgn0028939	2L	-1.17423	5.55107e-10	f
FBgn0028956	2R	-0.397722	0.0104817	f
FBgn0028962	3L	0.110354	0.0109493	m
FBgn0028969	X	0.11653	0.0183404	m
FBgn0028974	X	0.381869	5.66281e-05	m
FBgn0028978	3L	-0.327302	6.32484e-05	f
FBgn0028993	3L	-0.16549	0.0155917	f
FBgn0028999	3L	-0.417545	0.0371325	f
FBgn0029003	X	-0.174149	6.98428e-06	f
FBgn0029137	2L	0.0898484	0.0236677	m
FBgn0029147	2R	-1.19267	1.35944e-09	f
FBgn0029153	2R	-1.09007	0.0470599	f
FBgn0029167	3L	-0.969189	8.11136e-07	f
FBgn0029170	3R	-0.801481	0.0490915	f
FBgn0029172	3L	-4.17148	6.78065e-05	f
FBgn0029175	2R	0.111538	2.10796e-06	m
FBgn0029176	3R	-0.16579	0.0126151	f
FBgn0029507	2R	-0.761813	3.13434e-10	f
FBgn0029518	X	-0.97277	9.9233e-07	f
FBgn0029521	X	-0.422569	0.00110001	f
FBgn0029525	X	0.341848	1.19715e-20	m
FBgn0029526	X	-0.221454	2.88308e-05	f
FBgn0029573	X	2.7927	2.09142e-40	m
FBgn0029580	X	0.272445	0.0278909	m
FBgn0029588	X	0.396537	0.00063897	m
FBgn0029608	X	-0.214567	1.4857e-05	f
FBgn0029656	X	-0.533435	6.376e-05	f
FBgn0029660	X	-1.87043	0.0098799	f
FBgn0029661	X	-1.34275	0.0289129	f
FBgn0029662	X	-1.38849	3.99209e-05	f
FBgn0029667	X	-0.811218	7.40158e-05	f
FBgn0029676	X	0.189125	6.05722e-12	m
FBgn0029685	X	0.265182	2.9525e-10	m
FBgn0029686	X	0.204641	0.00183109	m
FBgn0029687	X	-0.122889	0.00622602	f
FBgn0029690	X	-1.68989	0.00079247	f
FBgn0029705	X	-1.6865	0.000195019	f
FBgn0029710	X	-0.139393	0.000309724	f
FBgn0029712	X	0.401659	7.2014e-06	m
FBgn0029713	X	0.172029	1.48575e-05	m
FBgn0029714	X	0.217719	0.00702982	m
FBgn0029715	X	-0.207647	0.00224286	f
FBgn0029719	X	-0.315694	0.000106832	f
FBgn0029720	X	-0.150679	4.70858e-05	f
FBgn0029722	X	1.16382	7.38576e-44	m
FBgn0029727	X	-1.28912	0.00401554	f
FBgn0029728	X	-0.897846	6.35864e-05	f
FBgn0029730	X	-0.634558	8.21861e-07	f
FBgn0029736	X	0.146739	0.000303916	m
FBgn0029745	X	-0.784383	4.06174e-05	f
FBgn0029747	X	-0.879732	7.46663e-08	f
FBgn0029752	X	1.32872	5.23637e-07	m
FBgn0029754	X	-2.55306	0.0276149	f
FBgn0029766	X	-0.791042	4.25557e-06	f
FBgn0029768	X	0.112998	0.0208032	m
FBgn0029769	X	-1.6455	4.28456e-12	f
FBgn0029771	X	-0.169629	0.0111802	f
FBgn0029778	X	-0.225307	7.64592e-05	f
FBgn0029791	X	-0.545603	4.75393e-07	f
FBgn0029807	X	-0.560415	0.0203428	f
FBgn0029810	X	0.167846	0.00413327	m
FBgn0029813	X	-1.24157	1.46364e-05	f
FBgn0029819	X	-0.161019	1.47666e-05	f
FBgn0029820	X	0.068665	0.0323272	m
FBgn0029821	X	-2.42884	9.18017e-104	f
FBgn0029822	X	-0.222755	0.00447608	f
FBgn0029823	X	-0.802841	1.18167e-29	f
FBgn0029825	X	0.141466	0.0103944	m
FBgn0029828	X	-1.17244	0.000275558	f
FBgn0029830	X	0.349798	3.27436e-05	m
FBgn0029833	X	-0.22364	0.00574172	f
FBgn0029837	X	0.163049	3.7783e-05	m
FBgn0029838	X	-0.567572	0.000160767	f
FBgn0029849	X	0.261187	1.31408e-07	m
FBgn0029854	X	0.175665	0.0377602	m
FBgn0029856	X	0.329821	0.000214994	m
FBgn0029858	X	0.228129	0.00578563	m
FBgn0029860	X	-0.332261	7.95095e-07	f
FBgn0029866	X	-0.304365	0.0153219	f
FBgn0029867	X	0.161315	0.00286577	m
FBgn0029879	X	2.54452	1.31798e-24	m
FBgn0029880	X	-0.9148	0.00343229	f
FBgn0029885	X	-0.210696	0.000363717	f
FBgn0029891	X	-0.212276	7.32171e-13	f
FBgn0029893	X	-0.16681	0.000344224	f
FBgn0029894	X	-0.166277	0.000231904	f
FBgn0029906	X	0.584835	3.83405e-17	m
FBgn0029907	X	0.838344	0.00357695	m
FBgn0029912	X	-0.124046	0.0028418	f
FBgn0029913	X	0.35966	1.01128e-10	m
FBgn0029914	X	-0.27042	2.22939e-16	f
FBgn0029915	X	-0.3932	4.74474e-12	f
FBgn0029925	X	-0.176856	0.00320511	f
FBgn0029929	X	-0.443896	2.65089e-10	f
FBgn0029932	X	-0.227082	0.0350535	f
FBgn0029935	X	-0.238241	3.36824e-13	f
FBgn0029936	X	-0.290194	8.36677e-16	f
FBgn0029937	X	-0.278822	3.57972e-07	f
FBgn0029939	X	-0.359116	3.28786e-13	f
FBgn0029941	X	-0.118934	0.039793	f
FBgn0029944	X	1.0862	1.65892e-32	m
FBgn0029945	X	1.30633	5.45175e-06	m
FBgn0029950	X	0.436973	8.66532e-19	m
FBgn0029955	X	-0.193958	5.76459e-11	f
FBgn0029957	X	-0.258083	4.81568e-15	f
FBgn0029958	X	-0.135387	0.00609774	f
FBgn0029959	X	-0.224051	1.62403e-11	f
FBgn0029962	X	-0.119257	0.0407189	f
FBgn0029968	X	-1.53625	2.26722e-06	f
FBgn0029970	X	0.958501	1.09052e-05	m
FBgn0029986	X	0.439016	0.00235095	m
FBgn0029990	X	-1.1566	0.000115972	f
FBgn0030003	X	-0.163423	0.00220606	f
FBgn0030004	X	-0.131682	0.00600894	f
FBgn0030006	X	0.346164	3.16774e-05	m
FBgn0030007	X	0.18079	0.00129167	m
FBgn0030010	X	0.218493	0.000485888	m
FBgn0030012	X	0.313654	2.51427e-08	m
FBgn0030029	X	-0.647615	1.91613e-08	f
FBgn0030034	X	0.297791	3.57972e-07	m
FBgn0030035	X	0.178285	9.87761e-06	m
FBgn0030040	X	-1.38499	1.79438e-05	f
FBgn0030041	X	-1.17183	1.17064e-15	f
FBgn0030048	X	-0.385669	0.0114328	f
FBgn0030051	X	1.89502	1.24264e-09	m
FBgn0030056	X	-0.272672	3.11046e-11	f
FBgn0030057	X	0.208293	0.000366896	m
FBgn0030058	X	-0.104664	0.0323272	f
FBgn0030061	X	0.140367	0.00106354	m
FBgn0030067	X	0.539995	1.07814e-14	m
FBgn0030073	X	-0.983797	9.85597e-05	f
FBgn0030077	X	0.812131	3.68056e-15	m
FBgn0030078	X	-0.729247	5.61469e-06	f
FBgn0030081	X	0.2689	1.44336e-08	m
FBgn0030082	X	-0.167636	0.00101975	f
FBgn0030085	X	0.954168	5.2972e-48	m
FBgn0030086	X	0.317888	1.19569e-06	m
FBgn0030092	X	0.396114	7.0039e-11	m
FBgn0030093	X	-0.0931067	0.027927	f
FBgn0030099	X	-0.192644	0.0181465	f
FBgn0030102	X	-1.13798	0.0125085	f
FBgn0030103	X	-0.720518	1.39452e-07	f
FBgn0030105	X	1.99487	0.032086	m
FBgn0030121	X	-0.182567	0.0120423	f
FBgn0030122	X	0.226365	1.43171e-05	m
FBgn0030137	X	0.347023	4.3072e-07	m
FBgn0030141	X	0.277957	2.13053e-14	m
FBgn0030151	X	0.204788	0.000171703	m
FBgn0030157	X	-0.548328	1.47066e-06	f
FBgn0030183	X	-0.248784	0.00829979	f
FBgn0030206	X	0.639928	1.16928e-53	m
FBgn0030208	X	0.102235	0.00389741	m
FBgn0030217	X	0.815168	2.9562e-98	m
FBgn0030228	X	0.158006	0.0290084	m
FBgn0030230	X	0.259184	3.80574e-19	m
FBgn0030240	X	0.182882	1.15999e-07	m
FBgn0030241	X	1.03843	1.84582e-11	m
FBgn0030242	X	1.71348	6.30444e-31	m
FBgn0030245	X	0.165392	4.09212e-06	m
FBgn0030257	X	-0.342135	5.48556e-05	f
FBgn0030258	X	-0.337646	3.01487e-10	f
FBgn0030259	X	-0.196484	3.43268e-05	f
FBgn0030260	X	-0.235217	1.47914e-05	f
FBgn0030262	X	-1.92623	1.21692e-07	f
FBgn0030269	X	-0.12259	0.0043399	f
FBgn0030274	X	-0.310211	2.71052e-23	f
FBgn0030289	X	0.223912	6.96064e-12	m
FBgn0030290	X	2.33379	2.48784e-06	m
FBgn0030293	X	-0.133911	0.0151231	f
FBgn0030296	X	-0.842946	3.67689e-07	f
FBgn0030297	X	-2.41223	8.97495e-05	f
FBgn0030304	X	0.309504	3.92263e-08	m
FBgn0030318	X	0.188628	1.38655e-07	m
FBgn0030319	X	-0.784692	0.00939167	f
FBgn0030320	X	0.225823	4.63066e-05	m
FBgn0030329	X	-0.196278	7.79894e-06	f
FBgn0030332	X	-0.6747	3.70044e-20	f
FBgn0030334	X	-1.19396	2.20437e-08	f
FBgn0030341	X	-0.170606	0.00632605	f
FBgn0030343	X	0.105579	0.0329055	m
FBgn0030344	X	0.19869	3.56773e-08	m
FBgn0030348	X	0.771111	1.12224e-20	m
FBgn0030349	X	-0.168459	0.0356082	f
FBgn0030351	X	0.244693	0.000345183	m
FBgn0030360	X	0.495202	0.0274229	m
FBgn0030362	X	-0.538342	9.56485e-07	f
FBgn0030364	X	-0.199824	7.55666e-05	f
FBgn0030365	X	0.222043	0.000760391	m
FBgn0030366	X	0.175359	0.00130223	m
FBgn0030377	X	-1.27074	3.63534e-07	f
FBgn0030390	X	-1.3074	0.00058414	f
FBgn0030398	X	-0.371702	0.0483944	f
FBgn0030400	X	-0.176643	0.00455087	f
FBgn0030403	X	0.244598	1.80242e-11	m
FBgn0030406	X	-0.09177	0.0285436	f
FBgn0030407	X	-0.500673	2.37987e-16	f
FBgn0030408	X	-0.258126	3.0717e-05	f
FBgn0030417	X	-0.35412	3.40959e-10	f
FBgn0030425	X	-0.659474	0.00671331	f
FBgn0030431	X	-0.216759	5.18223e-09	f
FBgn0030434	X	-0.14177	0.0356524	f
FBgn0030435	X	-0.153735	0.000181132	f
FBgn0030437	X	0.332318	4.75163e-15	m
FBgn0030439	X	-0.351639	0.0154994	f
FBgn0030447	X	-0.259947	0.000172514	f
FBgn0030455	X	0.733836	0.0488836	m
FBgn0030466	X	0.145526	0.0455873	m
FBgn0030474	X	-0.211981	1.52152e-10	f
FBgn0030477	X	-1.08073	4.01198e-11	f
FBgn0030479	X	-0.248314	0.0091887	f
FBgn0030482	X	-0.516586	0.00078517	f
FBgn0030485	X	-0.0994596	0.00300094	f
FBgn0030500	X	2.05524	1.2941e-09	m
FBgn0030503	X	0.276254	0.0179827	m
FBgn0030504	X	0.487881	5.74896e-60	m
FBgn0030506	X	0.328652	7.56514e-21	m
FBgn0030507	X	1.88097	2.30171e-23	m
FBgn0030510	X	0.314735	1.78345e-05	m
FBgn0030511	X	0.978032	5.85787e-34	m
FBgn0030512	X	-0.210789	8.68538e-06	f
FBgn0030528	X	-0.203006	0.00071329	f
FBgn0030529	X	0.0938075	0.0149067	m
FBgn0030530	X	0.110375	0.00291648	m
FBgn0030539	X	-1.28799	0.0327987	f
FBgn0030545	X	-0.434927	4.93806e-13	f
FBgn0030551	X	0.828286	0.0444151	m
FBgn0030552	X	0.222865	4.69222e-05	m
FBgn0030554	X	0.488146	4.1971e-25	m
FBgn0030555	X	-0.223499	2.13218e-14	f
FBgn0030558	X	-0.519305	0.0405349	f
FBgn0030559	X	-0.169882	2.00838e-06	f
FBgn0030572	X	0.44949	5.15685e-08	m
FBgn0030573	X	0.195875	0.00276355	m
FBgn0030574	X	0.129453	0.0216259	m
FBgn0030576	X	-0.204554	0.00460315	f
FBgn0030582	X	0.142909	8.31834e-05	m
FBgn0030590	X	-0.358142	0.0137686	f
FBgn0030607	X	-0.576135	0.0189633	f
FBgn0030611	X	-0.187649	0.0122746	f
FBgn0030612	X	-0.239912	5.38711e-06	f
FBgn0030628	X	0.513829	4.591e-05	m
FBgn0030629	X	-0.582389	1.72194e-54	f
FBgn0030634	X	0.246974	8.58998e-13	m
FBgn0030638	X	0.159764	0.017471	m
FBgn0030648	X	-0.117531	6.34314e-08	f
FBgn0030653	X	0.381437	0.031002	m
FBgn0030654	X	-0.203186	3.30197e-06	f
FBgn0030657	X	-0.406145	3.96576e-13	f
FBgn0030658	X	-0.145905	0.00830691	f
FBgn0030659	X	-0.159938	0.00506715	f
FBgn0030660	X	-0.266002	0.000177824	f
FBgn0030668	X	-0.370584	1.19715e-20	f
FBgn0030671	X	-0.123895	0.012107	f
FBgn0030673	X	0.190252	0.00141131	m
FBgn0030675	X	-0.427481	0.00180986	f
FBgn0030676	X	0.552345	5.82342e-08	m
FBgn0030683	X	0.573799	1.71143e-11	m
FBgn0030686	X	0.247578	1.49036e-06	m
FBgn0030687	X	0.124168	0.0267181	m
FBgn0030691	X	0.622947	0.000176179	m
FBgn0030693	X	-0.159471	2.58326e-05	f
FBgn0030695	X	0.089733	0.0140156	m
FBgn0030696	X	-1.0309	0.0039561	f
FBgn0030699	X	0.0791215	0.00489144	m
FBgn0030700	X	1.1863	9.47971e-32	m
FBgn0030704	X	-0.566547	3.20733e-35	f
FBgn0030707	X	-0.225211	1.46597e-10	f
FBgn0030715	X	0.23874	0.0171118	m
FBgn0030720	X	0.660392	1.37688e-27	m
FBgn0030721	X	1.6826	2.37271e-11	m
FBgn0030722	X	2.22705	0.000542838	m
FBgn0030735	X	-0.109858	0.0137076	f
FBgn0030742	X	-0.0689572	0.0377602	f
FBgn0030745	X	0.179947	0.00192037	m
FBgn0030748	X	-1.29953	0.0223277	f
FBgn0030749	X	-0.264289	1.21258e-06	f
FBgn0030761	X	0.321451	1.28238e-08	m
FBgn0030766	X	0.583796	2.91559e-14	m
FBgn0030769	X	-0.22338	0.00307972	f
FBgn0030774	X	0.566896	0.0104898	m
FBgn0030775	X	0.597947	0.00214051	m
FBgn0030776	X	0.533465	0.000505652	m
FBgn0030777	X	0.456399	0.00674427	m
FBgn0030778	X	-0.189914	1.42169e-14	f
FBgn0030780	X	-1.45742	9.39315e-37	f
FBgn0030786	X	0.220051	0.00221763	m
FBgn0030787	X	-0.193917	2.46597e-07	f
FBgn0030789	X	0.529909	6.74955e-17	m
FBgn0030790	X	0.138147	0.000662171	m
FBgn0030791	X	0.167872	0.0240975	m
FBgn0030793	X	0.330856	1.46588e-08	m
FBgn0030799	X	0.80557	3.14532e-13	m
FBgn0030800	X	0.132846	0.0298639	m
FBgn0030801	X	-0.191232	0.00273134	f
FBgn0030802	X	-0.232625	0.00589615	f
FBgn0030808	X	0.501831	9.14144e-08	m
FBgn0030816	X	0.177159	0.0187442	m
FBgn0030817	X	-0.183321	0.0405587	f
FBgn0030828	X	0.739148	8.2954e-05	m
FBgn0030833	X	0.18545	0.000590056	m
FBgn0030838	X	-0.0747973	0.0448124	f
FBgn0030839	X	-0.50154	1.49036e-06	f
FBgn0030841	X	0.399875	0.00544673	m
FBgn0030844	X	-2.3629	0.0219748	f
FBgn0030846	X	0.521845	0.00994981	m
FBgn0030847	X	0.197499	1.77606e-14	m
FBgn0030850	X	-0.142872	6.51505e-06	f
FBgn0030854	X	0.352111	2.71956e-33	m
FBgn0030855	X	0.332892	3.78288e-07	m
FBgn0030858	X	0.323416	1.61727e-17	m
FBgn0030864	X	0.236191	8.85211e-06	m
FBgn0030869	X	-0.169569	0.00077837	f
FBgn0030871	X	0.757225	1.40665e-18	m
FBgn0030873	X	0.0733871	0.0327076	m
FBgn0030880	X	1.99355	4.23214e-05	m
FBgn0030881	X	-0.721692	0.00174928	f
FBgn0030883	X	0.185893	0.0187419	m
FBgn0030884	X	-0.249535	0.000544982	f
FBgn0030886	X	-0.364244	1.21581e-06	f
FBgn0030887	X	0.470116	4.5262e-32	m
FBgn0030889	X	-0.794938	0.00160104	f
FBgn0030891	X	-0.119663	0.000278259	f
FBgn0030892	X	-0.101515	0.00105159	f
FBgn0030895	X	0.721488	1.82501e-10	m
FBgn0030897	X	-0.242108	0.0137966	f
FBgn0030900	X	-0.708385	0.0365544	f
FBgn0030912	X	-0.382309	1.55347e-08	f
FBgn0030925	X	-1.01926	0.00553275	f
FBgn0030926	X	-1.17538	1.95603e-05	f
FBgn0030932	X	0.905626	2.71052e-23	m
FBgn0030933	X	0.574609	2.14674e-06	m
FBgn0030936	X	-0.37297	0.0187895	f
FBgn0030937	X	-0.800124	1.80558e-06	f
FBgn0030938	X	-0.743203	1.61522e-05	f
FBgn0030945	X	-0.176445	0.000404673	f
FBgn0030946	X	0.14641	0.000380546	m
FBgn0030956	X	-0.129645	0.000895391	f
FBgn0030959	X	-0.120319	0.0467641	f
FBgn0030960	X	-0.074192	0.0417156	f
FBgn0030963	X	0.190519	0.00701077	m
FBgn0030966	X	0.260025	8.69323e-06	m
FBgn0030968	X	-0.692997	6.49413e-08	f
FBgn0030974	X	0.129586	0.00435816	m
FBgn0030985	X	-0.690195	0.000119899	f
FBgn0030990	X	-0.197555	2.81105e-06	f
FBgn0030991	X	-0.313727	1.66128e-15	f
FBgn0030995	X	0.413966	3.13142e-06	m
FBgn0030996	X	0.0929041	0.00562707	m
FBgn0030997	X	0.181208	0.00627737	m
FBgn0030998	X	3.24823	3.45227e-128	m
FBgn0031002	X	-0.289015	0.00573826	f
FBgn0031003	X	0.489594	2.31062e-11	m
FBgn0031008	X	0.298112	8.5867e-14	m
FBgn0031010	X	3.31803	0.00460315	m
FBgn0031020	X	0.168598	3.6536e-05	m
FBgn0031022	X	-0.464019	7.28982e-08	f
FBgn0031023	X	-0.185423	0.0413774	f
FBgn0031034	X	3.14524	0.00013223	m
FBgn0031036	X	0.0952339	0.0496642	m
FBgn0031041	X	0.236848	0.00078517	m
FBgn0031043	X	0.118618	0.00380713	m
FBgn0031044	X	0.128295	0.00269479	m
FBgn0031047	X	-0.291303	3.43667e-28	f
FBgn0031051	X	0.203682	0.000595245	m
FBgn0031052	X	0.258918	3.59016e-06	m
FBgn0031053	X	0.370711	6.45064e-05	m
FBgn0031054	X	-0.270109	3.42494e-12	f
FBgn0031055	X	-0.730601	0.0106932	f
FBgn0031059	X	-0.130051	0.0482217	f
FBgn0031060	X	0.471407	0.00181182	m
FBgn0031062	X	0.478252	6.5515e-30	m
FBgn0031068	X	-0.277262	0.000578147	f
FBgn0031069	X	0.241624	1.14217e-13	m
FBgn0031078	X	0.484406	9.91717e-14	m
FBgn0031080	X	-0.6625	1.17143e-08	f
FBgn0031091	X	3.37368	4.86733e-14	m
FBgn0031093	X	0.156735	0.00460315	m
FBgn0031097	X	1.52725	3.40347e-25	m
FBgn0031098	X	-0.100608	0.00613919	f
FBgn0031099	X	-0.208549	0.0337702	f
FBgn0031104	X	3.65562	0.0252776	m
FBgn0031106	X	-0.142967	0.0167689	f
FBgn0031108	X	-2.02783	2.89803e-39	f
FBgn0031114	X	-0.116653	0.0356082	f
FBgn0031119	X	-0.533379	3.68047e-14	f
FBgn0031126	X	-0.714594	5.4583e-14	f
FBgn0031127	X	-2.92012	3.34794e-06	f
FBgn0031134	X	-0.609945	0.0411831	f
FBgn0031143	X	-0.185854	0.00122769	f
FBgn0031144	X	1.05892	2.63565e-81	m
FBgn0031146	X	0.678748	0.000595671	m
FBgn0031148	X	0.201312	0.00108436	m
FBgn0031149	X	0.208196	2.30405e-08	m
FBgn0031155	X	1.05687	1.09533e-07	m
FBgn0031157	X	1.27693	2.30706e-29	m
FBgn0031161	X	-0.50918	2.65991e-31	f
FBgn0031168	X	-0.989425	7.4631e-08	f
FBgn0031174	X	0.17648	2.80921e-10	m
FBgn0031182	X	-0.57454	3.48138e-11	f
FBgn0031183	X	-0.394935	4.57858e-16	f
FBgn0031188	X	0.143463	1.52613e-05	m
FBgn0031189	X	0.293786	2.68984e-12	m
FBgn0031190	X	-0.0722993	0.00622763	f
FBgn0031195	X	-0.517752	1.82073e-20	f
FBgn0031196	X	-0.797862	0.0483744	f
FBgn0031201	X	-1.13715	0.000440704	f
FBgn0031217	2L	0.0909806	0.0287735	m
FBgn0031220	2L	-0.236479	0.0200221	f
FBgn0031228	2L	0.201384	0.0120332	m
FBgn0031232	2L	-0.452824	0.0084868	f
FBgn0031240	2L	-0.419021	3.95335e-07	f
FBgn0031251	2L	-0.878518	0.0426366	f
FBgn0031261	2L	-1.5129	1.28008e-09	f
FBgn0031264	2L	-0.347702	0.000426562	f
FBgn0031279	2L	-0.83833	0.000250609	f
FBgn0031286	2L	0.228575	0.000327369	m
FBgn0031302	2L	-0.22941	9.77018e-05	f
FBgn0031305	2L	-1.16957	2.45225e-07	f
FBgn0031306	2L	0.182096	0.000547748	m
FBgn0031307	2L	-0.301447	0.000895391	f
FBgn0031313	2L	-0.556966	2.21271e-09	f
FBgn0031378	2L	0.308828	0.00864826	m
FBgn0031389	2L	-1.30767	2.70813e-07	f
FBgn0031392	2L	0.19997	4.00555e-12	m
FBgn0031393	2L	0.260377	7.68484e-07	m
FBgn0031398	2L	-0.128761	0.0361382	f
FBgn0031401	2L	0.116639	0.00421301	m
FBgn0031417	2L	-0.85193	0.00131773	f
FBgn0031424	2L	0.18084	0.013971	m
FBgn0031434	2L	-0.236947	0.000303916	f
FBgn0031435	2L	-0.201863	0.0203735	f
FBgn0031446	2L	-1.55729	4.38511e-09	f
FBgn0031449	2L	0.258913	0.0286745	m
FBgn0031453	2L	-0.0859875	0.042372	f
FBgn0031478	2L	-0.111197	0.0411076	f
FBgn0031489	2L	0.40932	0.031296	m
FBgn0031515	2L	-0.24887	0.0135852	f
FBgn0031520	2L	-0.329361	0.000378805	f
FBgn0031528	2L	-0.262958	0.00648153	f
FBgn0031538	2L	-0.63049	0.010172	f
FBgn0031540	2L	-0.348625	0.0458759	f
FBgn0031560	2L	-1.33387	0.000695384	f
FBgn0031561	2L	-1.13337	0.00170318	f
FBgn0031563	2L	-0.58741	0.01891	f
FBgn0031571	2L	0.487465	2.92425e-06	m
FBgn0031589	2L	-0.0953509	0.0188244	f
FBgn0031627	2L	0.136823	0.000158234	m
FBgn0031628	2L	-0.11393	0.00790401	f
FBgn0031635	2L	-0.116534	0.00106875	f
FBgn0031650	2L	-0.197576	0.00618774	f
FBgn0031651	2L	0.198535	0.00266813	m
FBgn0031678	2L	0.24397	0.0354203	m
FBgn0031689	2L	-0.339046	1.07367e-08	f
FBgn0031695	2L	-0.224205	0.0251883	f
FBgn0031703	2L	-0.22601	0.000315749	f
FBgn0031716	2L	0.0769255	0.0319284	m
FBgn0031762	2L	-0.183979	0.00160104	f
FBgn0031765	2L	0.140976	0.00577286	m
FBgn0031805	2L	-0.809615	0.0285222	f
FBgn0031814	2L	0.0827726	0.00829979	m
FBgn0031817	2L	0.188556	3.62454e-05	m
FBgn0031821	2L	-0.600148	1.0418e-08	f
FBgn0031907	2L	-0.546828	7.40856e-07	f
FBgn0031913	2L	-0.968048	4.68764e-05	f
FBgn0031914	2L	-0.226438	3.01903e-09	f
FBgn0031925	2L	4.28247	4.44673e-10	m
FBgn0031937	2L	-0.40087	0.0426553	f
FBgn0031939	2L	-0.294593	2.49329e-06	f
FBgn0031947	2L	-0.101228	0.0268282	f
FBgn0031948	2L	0.0981307	0.00101726	m
FBgn0031969	2L	-0.273222	8.10716e-06	f
FBgn0031970	2L	-0.808	4.73684e-07	f
FBgn0031971	2L	-0.236111	0.00408796	f
FBgn0032018	2L	0.107885	0.0180905	m
FBgn0032029	2L	-0.135692	0.0371795	f
FBgn0032048	2L	0.234808	5.06336e-09	m
FBgn0032069	2L	-0.643524	0.000244534	f
FBgn0032078	2L	-0.152723	1.90053e-14	f
FBgn0032079	2L	-0.229368	0.00909476	f
FBgn0032082	2L	-0.668147	0.0138294	f
FBgn0032115	2L	-0.98827	0.0460789	f
FBgn0032122	2L	-1.39006	0.0273455	f
FBgn0032123	2L	0.165474	0.0258221	m
FBgn0032124	2L	-1.0359	9.2379e-05	f
FBgn0032125	2L	-1.48264	0.0235134	f
FBgn0032127	2L	-0.589665	0.00670392	f
FBgn0032135	2L	0.109638	2.21788e-08	m
FBgn0032166	2L	0.177775	1.2404e-09	m
FBgn0032202	2L	-0.136774	0.0491804	f
FBgn0032228	2L	0.728396	0.0214396	m
FBgn0032231	2L	-0.129551	0.0236694	f
FBgn0032233	2L	0.0982902	0.0182735	m
FBgn0032242	2L	0.0701105	0.0223977	m
FBgn0032247	2L	0.287119	0.000805217	m
FBgn0032249	2L	0.0887482	0.00316894	m
FBgn0032262	2L	-1.45241	1.54535e-10	f
FBgn0032338	2L	-0.11242	0.013971	f
FBgn0032354	2L	0.165523	0.0190444	m
FBgn0032368	2L	-0.683256	0.0171276	f
FBgn0032382	2L	-0.356114	0.00350996	f
FBgn0032390	2L	-0.424683	2.54025e-05	f
FBgn0032397	2L	0.114206	0.000418732	m
FBgn0032399	2L	0.311921	0.0119841	m
FBgn0032402	2L	0.0781758	0.017099	m
FBgn0032404	2L	-0.171152	0.0194341	f
FBgn0032405	2L	0.137421	0.00707151	m
FBgn0032436	2L	-0.847196	0.0466845	f
FBgn0032479	2L	0.204757	0.00012626	m
FBgn0032495	2L	-0.937864	8.79144e-05	f
FBgn0032516	2L	-0.122311	0.0290902	f
FBgn0032586	2L	0.074233	0.000625529	m
FBgn0032587	2L	0.19422	0.011212	m
FBgn0032588	2L	-2.24756	0.0212894	f
FBgn0032603	2L	-0.274895	0.00949337	f
FBgn0032618	2L	-0.113967	0.0332595	f
FBgn0032652	2L	-0.828177	0.0232008	f
FBgn0032689	2L	0.0961134	0.0200221	m
FBgn0032700	2L	0.124921	7.48688e-05	m
FBgn0032713	2L	-0.226947	0.00042093	f
FBgn0032721	2L	-0.124231	0.00848856	f
FBgn0032726	2L	-1.23347	1.04343e-08	f
FBgn0032727	2L	-0.123594	0.0269116	f
FBgn0032731	2L	0.093236	0.0017051	m
FBgn0032773	2L	-0.763373	0.000439504	f
FBgn0032774	2L	-0.712801	0.0111802	f
FBgn0032775	2L	0.184987	3.14955e-05	m
FBgn0032781	2L	0.218052	6.19033e-05	m
FBgn0032787	2L	-0.215153	0.0106449	f
FBgn0032814	2L	-0.0909555	0.0118152	f
FBgn0032820	2L	-0.835421	5.66757e-05	f
FBgn0032833	2L	0.183071	0.0332864	m
FBgn0032880	2L	0.0646844	0.00319449	m
FBgn0032883	2L	0.119115	0.00814598	m
FBgn0032886	2L	0.143278	5.10357e-06	m
FBgn0032889	2L	-0.153687	0.010692	f
FBgn0032899	2L	-0.303277	0.0186294	f
FBgn0032900	2L	-0.558695	6.76997e-05	f
FBgn0032908	2L	0.531511	0.000674932	m
FBgn0032910	2L	0.171488	1.09617e-05	m
FBgn0032919	2L	0.0752183	0.0200221	m
FBgn0032934	2L	0.263167	0.0138299	m
FBgn0033015	2R	-0.120817	0.00812398	f
FBgn0033033	2R	0.264971	0.0108463	m
FBgn0033041	2R	1.98289	0.0239206	m
FBgn0033055	2R	0.103932	0.00197337	m
FBgn0033061	2R	-0.253908	0.00943302	f
FBgn0033065	2R	-0.359646	0.000271787	f
FBgn0033079	2R	-1.1626	2.05112e-29	f
FBgn0033093	2R	0.328512	7.39664e-05	m
FBgn0033122	2R	-0.0970867	0.0374239	f
FBgn0033135	2R	-0.334353	0.00115356	f
FBgn0033153	2R	-0.363082	0.00182083	f
FBgn0033174	2R	-0.90103	3.06442e-07	f
FBgn0033196	2R	0.0716987	0.0316388	m
FBgn0033240	2R	-0.0885027	0.0469824	f
FBgn0033241	2R	-0.126509	0.0215782	f
FBgn0033243	2R	0.433868	0.000166448	m
FBgn0033258	2R	0.174218	0.0154393	m
FBgn0033273	2R	0.180295	1.80863e-09	m
FBgn0033283	2R	-1.23634	2.92567e-05	f
FBgn0033285	2R	-1.10768	0.00231802	f
FBgn0033286	2R	-0.832259	0.00332159	f
FBgn0033287	2R	-1.01237	0.00357153	f
FBgn0033307	2R	-0.621128	0.00921829	f
FBgn0033320	2R	-0.661301	0.0202358	f
FBgn0033321	2R	-0.813108	0.00023574	f
FBgn0033354	2R	0.275647	0.000539775	m
FBgn0033356	2R	0.127083	0.0159683	m
FBgn0033357	2R	0.222585	0.0266686	m
FBgn0033367	2R	-0.250763	0.00173148	f
FBgn0033389	2R	0.355273	0.0113991	m
FBgn0033397	2R	-1.20742	0.000627855	f
FBgn0033400	2R	-0.105325	0.0439513	f
FBgn0033402	2R	-0.104212	0.0203897	f
FBgn0033404	2R	-0.391149	0.00289404	f
FBgn0033438	2R	0.0947925	0.0440042	m
FBgn0033446	2R	-0.159264	0.0390596	f
FBgn0033448	2R	0.278652	0.0276149	m
FBgn0033475	2R	-0.204833	0.000817903	f
FBgn0033484	2R	0.140256	0.0220652	m
FBgn0033518	2R	-0.53572	0.00360187	f
FBgn0033520	2R	-0.537661	0.00066319	f
FBgn0033521	2R	-0.606287	9.27242e-05	f
FBgn0033542	2R	0.342956	0.0421199	m
FBgn0033544	2R	-0.106508	0.0404438	f
FBgn0033550	2R	0.137203	5.32458e-05	m
FBgn0033558	2R	0.56552	9.13165e-16	m
FBgn0033603	2R	-1.37205	2.30405e-08	f
FBgn0033627	2R	-0.202999	1.4857e-05	f
FBgn0033631	2R	0.210189	0.0156409	m
FBgn0033638	2R	0.203479	0.0018817	m
FBgn0033654	2R	0.13517	0.0388116	m
FBgn0033673	2R	0.18679	1.18895e-12	m
FBgn0033713	2R	0.105441	0.00831242	m
FBgn0033724	2R	-1.3314	3.85388e-05	f
FBgn0033728	2R	0.55104	0.0405207	m
FBgn0033735	2R	-0.235619	0.00913821	f
FBgn0033753	2R	-0.265227	0.0496933	f
FBgn0033755	2R	-0.0702585	0.0113545	f
FBgn0033761	2R	0.141399	0.039796	m
FBgn0033762	2R	0.0714853	0.0397734	m
FBgn0033763	2R	0.485662	0.00358152	m
FBgn0033769	2R	0.172924	0.000796605	m
FBgn0033782	2R	-0.50512	0.0404284	f
FBgn0033816	2R	0.123445	4.91836e-05	m
FBgn0033828	2R	-1.29357	0.0276149	f
FBgn0033846	2R	-0.116841	0.0226608	f
FBgn0033862	2R	-0.90189	0.0274229	f
FBgn0033865	2R	-0.858647	0.000131855	f
FBgn0033880	2R	-1.41616	0.00289404	f
FBgn0033884	2R	0.0958513	0.00176492	m
FBgn0033904	2R	-0.207813	0.000365591	f
FBgn0033911	2R	0.127919	2.94727e-11	m
FBgn0033919	2R	-0.12531	0.0258608	f
FBgn0033945	2R	-0.156346	0.0484287	f
FBgn0033949	2R	-0.746899	0.00402374	f
FBgn0033978	2R	-0.374252	0.0190345	f
FBgn0033996	2R	-0.0849838	0.0112771	f
FBgn0034022	2R	0.768001	9.73119e-06	m
FBgn0034027	2R	0.142396	1.14296e-05	m
FBgn0034069	2R	-0.301394	0.000275466	f
FBgn0034075	2R	-0.217801	1.45289e-07	f
FBgn0034093	2R	-0.0979408	0.0049435	f
FBgn0034110	2R	-0.0965888	0.0121876	f
FBgn0034139	2R	-0.980403	0.00286577	f
FBgn0034140	2R	-0.916098	0.00379052	f
FBgn0034197	2R	0.294029	0.0154418	m
FBgn0034198	2R	-0.852107	0.00413327	f
FBgn0034200	2R	-0.844699	0.00186787	f
FBgn0034218	2R	0.784794	1.10678e-40	m
FBgn0034248	2R	0.163355	0.0495674	m
FBgn0034249	2R	-0.685587	1.98305e-17	f
FBgn0034258	2R	0.0657789	0.030194	m
FBgn0034259	2R	0.236743	2.08153e-05	m
FBgn0034261	2R	0.131422	0.038095	m
FBgn0034266	2R	-0.152962	0.0499001	f
FBgn0034282	2R	0.230437	2.1348e-05	m
FBgn0034290	2R	-1.27926	0.00078517	f
FBgn0034331	2R	-0.945645	0.00320513	f
FBgn0034365	2R	-0.33922	5.139e-08	f
FBgn0034379	2R	-0.0966192	0.0459725	f
FBgn0034383	2R	0.884267	0.0185667	m
FBgn0034396	2R	-0.11911	0.0106674	f
FBgn0034397	2R	-0.325871	4.72637e-06	f
FBgn0034398	2R	-0.205344	3.483e-05	f
FBgn0034405	2R	-0.26835	4.93477e-06	f
FBgn0034406	2R	-0.272676	0.00640115	f
FBgn0034417	2R	-0.148531	0.0177335	f
FBgn0034433	2R	0.119598	0.0170743	m
FBgn0034435	2R	-0.716587	0.00122177	f
FBgn0034436	2R	-0.36187	1.88743e-09	f
FBgn0034479	2R	-1.0107	0.00130447	f
FBgn0034485	2R	-0.0592673	0.0449951	f
FBgn0034487	2R	-0.191773	0.00773054	f
FBgn0034495	2R	0.214173	0.00707151	m
FBgn0034518	2R	0.0763599	0.0254871	m
FBgn0034538	2R	-0.520355	8.64617e-05	f
FBgn0034553	2R	-2.61397	0.0435433	f
FBgn0034611	2R	-0.119817	0.000226652	f
FBgn0034617	2R	0.14098	0.0379466	m
FBgn0034629	2R	-0.948422	8.54096e-09	f
FBgn0034638	2R	-0.137343	0.00107328	f
FBgn0034639	2R	-0.599855	2.09622e-13	f
FBgn0034681	2R	-1.25106	0.00135948	f
FBgn0034717	2R	-0.91583	0.000662171	f
FBgn0034718	2R	0.136918	0.0483944	m
FBgn0034723	2R	0.113878	0.0178453	m
FBgn0034724	2R	-0.335342	0.0428981	f
FBgn0034725	2R	0.114966	0.0297557	m
FBgn0034737	2R	-0.265919	0.0356524	f
FBgn0034761	2R	-0.678111	0.000591916	f
FBgn0034786	2R	0.156433	0.0291258	m
FBgn0034788	2R	0.0846278	0.00348529	m
FBgn0034796	2R	-0.218463	0.000210948	f
FBgn0034797	2R	-0.298848	0.000366896	f
FBgn0034808	2R	-0.15256	7.60448e-08	f
FBgn0034897	2R	-0.246545	8.79144e-05	f
FBgn0034909	2R	-0.860194	1.55351e-13	f
FBgn0034910	2R	-0.685594	0.0361201	f
FBgn0034911	2R	0.19121	0.0458456	m
FBgn0034943	2R	-0.613511	0.00300094	f
FBgn0034958	2R	-0.066102	0.00181182	f
FBgn0034970	2R	-0.165178	4.84955e-09	f
FBgn0034972	2R	0.97913	0.0250413	m
FBgn0034997	2R	-0.347343	6.34764e-17	f
FBgn0035000	2R	-0.305758	0.0496933	f
FBgn0035016	2R	0.143073	0.0482437	m
FBgn0035021	2R	-0.138695	0.000702135	f
FBgn0035023	2R	-0.190684	0.00533746	f
FBgn0035027	2R	-0.0808704	0.00848191	f
FBgn0035036	2R	-0.0855079	0.0411831	f
FBgn0035049	2R	0.426785	0.0168815	m
FBgn0035050	2R	-0.443583	6.44309e-23	f
FBgn0035060	2R	0.114675	0.0306268	m
FBgn0035078	2R	-0.327939	0.0367808	f
FBgn0035091	2R	-0.726152	0.00083365	f
FBgn0035099	3L	0.326948	1.46148e-05	m
FBgn0035146	3L	-0.138083	0.003868	f
FBgn0035171	3L	-0.0967846	0.00697567	f
FBgn0035186	3L	-1.0571	0.000217428	f
FBgn0035204	3L	-0.133679	0.0111678	f
FBgn0035213	3L	-0.10452	0.0252379	f
FBgn0035231	3L	-0.196793	0.0140857	f
FBgn0035266	3L	0.3184	0.00521844	m
FBgn0035271	3L	0.195405	0.0384612	m
FBgn0035279	3L	2.62089	0.00114814	m
FBgn0035281	3L	-0.681067	0.00171571	f
FBgn0035282	3L	-0.440752	1.24201e-05	f
FBgn0035287	3L	0.147045	1.77854e-06	m
FBgn0035346	3L	-0.214658	0.00619052	f
FBgn0035390	3L	-0.0989866	0.0126759	f
FBgn0035422	3L	-0.185642	0.0443553	f
FBgn0035432	3L	0.0619461	0.0095763	m
FBgn0035445	3L	-0.166145	0.0179011	f
FBgn0035452	3L	-0.444572	0.00823363	f
FBgn0035495	3L	0.108127	0.046572	m
FBgn0035541	3L	-0.13332	0.0356524	f
FBgn0035542	3L	-0.139281	3.29803e-06	f
FBgn0035582	3L	-0.898064	0.0455054	f
FBgn0035598	3L	-0.494555	1.43358e-05	f
FBgn0035600	3L	0.14849	0.0266431	m
FBgn0035610	3L	-0.328454	3.67102e-10	f
FBgn0035623	3L	-0.6618	0.00317856	f
FBgn0035624	3L	-0.172905	0.00391528	f
FBgn0035657	3L	-2.0115	0.0419357	f
FBgn0035679	3L	-0.147823	0.0151169	f
FBgn0035695	3L	-0.160833	0.0068795	f
FBgn0035710	3L	-0.425251	2.72853e-26	f
FBgn0035719	3L	-0.111106	0.000285651	f
FBgn0035737	3L	0.705809	0.0202439	m
FBgn0035763	3L	-0.102617	0.00456584	f
FBgn0035766	3L	-0.200406	0.00797285	f
FBgn0035791	3L	-1.99251	4.06314e-16	f
FBgn0035797	3L	-0.533793	0.0133371	f
FBgn0035816	3L	-0.24719	1.71057e-08	f
FBgn0035844	3L	0.578547	1.22617e-05	m
FBgn0035848	3L	0.0996213	0.0223848	m
FBgn0035850	3L	-0.0729101	0.0321537	f
FBgn0035859	3L	-0.971068	0.0192841	f
FBgn0035877	3L	-0.179003	1.08897e-05	f
FBgn0035890	3L	0.13581	0.0181465	m
FBgn0035896	3L	0.307154	0.0269116	m
FBgn0035900	3L	-0.108309	0.00457383	f
FBgn0035934	3L	0.140006	0.0308605	m
FBgn0035942	3L	0.247078	3.89028e-12	m
FBgn0035968	3L	0.213931	2.13847e-05	m
FBgn0035981	3L	-0.109284	0.00644868	f
FBgn0035989	3L	0.0603785	0.00971154	m
FBgn0036018	3L	-0.20765	9.77978e-08	f
FBgn0036031	3L	-0.192574	0.00743434	f
FBgn0036046	3L	-0.339193	0.00368393	f
FBgn0036059	3L	-0.118632	0.0377926	f
FBgn0036085	3L	-0.405185	0.0384612	f
FBgn0036090	3L	-0.117758	0.042958	f
FBgn0036094	3L	0.396874	0.0110598	m
FBgn0036099	3L	0.111877	0.0088825	m
FBgn0036121	3L	-0.551669	5.19618e-06	f
FBgn0036143	3L	-0.250564	0.00803902	f
FBgn0036145	3L	-0.813362	3.97064e-44	f
FBgn0036147	3L	-0.529652	3.37344e-60	f
FBgn0036150	3L	0.207847	0.0125897	m
FBgn0036157	3L	-0.718148	0.0141668	f
FBgn0036178	3L	-0.470902	0.0175372	f
FBgn0036198	3L	-0.178387	0.0261221	f
FBgn0036212	3L	0.138733	0.0228359	m
FBgn0036218	3L	-1.28885	0.0425412	f
FBgn0036237	3L	-0.145976	0.0377602	f
FBgn0036239	3L	-0.0831132	0.0126421	f
FBgn0036240	3L	-0.197938	2.72692e-08	f
FBgn0036249	3L	-0.165341	0.0207535	f
FBgn0036259	3L	0.128279	0.00471845	m
FBgn0036260	3L	0.140838	0.00590931	m
FBgn0036272	3L	0.0810238	9.05649e-07	m
FBgn0036273	3L	0.095769	0.03123	m
FBgn0036279	3L	0.277284	1.80581e-06	m
FBgn0036288	3L	-0.495252	4.88923e-10	f
FBgn0036314	3L	-0.137518	0.0249313	f
FBgn0036316	3L	0.164807	5.99156e-09	m
FBgn0036319	3L	0.120754	0.000350468	m
FBgn0036333	3L	-0.0803373	0.0187419	f
FBgn0036334	3L	0.177704	0.0482176	m
FBgn0036377	3L	0.373869	0.0102813	m
FBgn0036415	3L	0.985844	0.0452725	m
FBgn0036423	3L	-0.443377	0.000135451	f
FBgn0036428	3L	-0.421107	0.00101098	f
FBgn0036437	3L	-1.01643	0.000189366	f
FBgn0036449	3L	-0.139342	0.000154667	f
FBgn0036479	3L	-0.320518	9.05407e-06	f
FBgn0036502	3L	0.139565	0.000173438	m
FBgn0036529	3L	2.41722	0.00197208	m
FBgn0036537	3L	-0.131233	0.0443553	f
FBgn0036538	3L	-0.17093	0.00401554	f
FBgn0036547	3L	-0.353634	0.00811709	f
FBgn0036550	3L	0.17037	0.0356082	m
FBgn0036551	3L	0.196625	0.00213896	m
FBgn0036569	3L	0.108923	0.0264963	m
FBgn0036587	3L	-1.03674	6.69894e-06	f
FBgn0036602	3L	2.35337	0.0141668	m
FBgn0036622	3L	-0.828956	0.0268282	f
FBgn0036627	3L	0.438816	0.00908906	m
FBgn0036661	3L	-0.131983	0.000846471	f
FBgn0036663	3L	0.216252	0.00484399	m
FBgn0036688	3L	0.26697	0.00881976	m
FBgn0036702	3L	0.186552	7.36928e-07	m
FBgn0036733	3L	-0.11326	0.0283945	f
FBgn0036741	3L	0.149236	0.000411022	m
FBgn0036752	3L	-1.03488	0.00312564	f
FBgn0036762	3L	0.199922	7.95569e-05	m
FBgn0036763	3L	0.250635	3.12412e-10	m
FBgn0036773	3L	-0.10049	0.0473719	f
FBgn0036777	3L	0.229137	0.013413	m
FBgn0036786	3L	-0.275668	0.000685808	f
FBgn0036818	3L	-0.154072	0.00274495	f
FBgn0036837	3L	-0.118569	0.0016977	f
FBgn0036844	3L	0.160706	0.00419954	m
FBgn0036880	3L	1.65656	4.92154e-06	m
FBgn0036882	3L	0.191769	6.33003e-06	m
FBgn0036887	3L	0.172648	0.0283124	m
FBgn0036891	3L	-0.869773	1.12362e-05	f
FBgn0036892	3L	0.151559	2.27745e-10	m
FBgn0036893	3L	0.125432	0.0253554	m
FBgn0036911	3L	-0.0955653	0.0268998	f
FBgn0036932	3L	-0.165815	0.00517226	f
FBgn0036984	3L	0.123865	4.69313e-06	m
FBgn0036992	3L	-0.272104	0.00212319	f
FBgn0036995	3L	-0.386591	0.00178776	f
FBgn0036997	3L	-0.275886	0.00247046	f
FBgn0036999	3L	-0.109607	0.0130357	f
FBgn0037001	3L	0.189341	0.0123088	m
FBgn0037007	3L	-0.250639	0.000197503	f
FBgn0037010	3L	0.096533	0.0068795	m
FBgn0037012	3L	-0.983288	5.40584e-37	f
FBgn0037015	3L	0.0619862	0.013651	m
FBgn0037016	3L	-0.201004	0.00236557	f
FBgn0037018	3L	0.170001	0.0098799	m
FBgn0037060	3L	-0.162763	4.22117e-05	f
FBgn0037069	3L	-0.398399	0.0119202	f
FBgn0037100	3L	-0.181264	0.0271783	f
FBgn0037106	3L	-0.15449	0.0251112	f
FBgn0037138	3L	0.146631	6.14346e-14	m
FBgn0037140	3L	-0.1168	0.0169486	f
FBgn0037144	3L	-0.254379	0.02229	f
FBgn0037151	3L	0.330573	0.0263205	m
FBgn0037162	3L	-1.1651	6.68488e-05	f
FBgn0037163	3L	-0.597694	0.0167949	f
FBgn0037164	3L	-0.632228	0.048864	f
FBgn0037170	3L	-1.4203	0.000823156	f
FBgn0037186	3L	-0.331113	1.48249e-08	f
FBgn0037215	3R	-0.251908	8.37326e-10	f
FBgn0037239	3R	-0.0977611	0.0484287	f
FBgn0037262	3R	-0.16543	0.000378838	f
FBgn0037297	3R	-0.126579	0.00387821	f
FBgn0037315	3R	0.106925	0.00138534	m
FBgn0037323	3R	1.44936	0.0459895	m
FBgn0037324	3R	0.432604	1.24438e-07	m
FBgn0037325	3R	-0.962763	0.0156762	f
FBgn0037327	3R	0.118259	0.0190444	m
FBgn0037338	3R	-0.13211	0.0204061	f
FBgn0037410	3R	-0.608287	0.000203491	f
FBgn0037429	3R	1.22958	4.88066e-05	m
FBgn0037446	3R	-0.106863	0.00160104	f
FBgn0037448	3R	0.265997	0.00393252	m
FBgn0037464	3R	1.56833	0.028677	m
FBgn0037467	3R	-0.0840702	0.00599272	f
FBgn0037470	3R	-0.0796197	0.00258331	f
FBgn0037472	3R	0.133304	0.00902046	m
FBgn0037475	3R	0.175872	2.64868e-05	m
FBgn0037481	3R	-0.284793	0.00324076	f
FBgn0037513	3R	-1.22995	4.43562e-49	f
FBgn0037515	3R	-0.499119	0.000372493	f
FBgn0037530	3R	0.0689277	0.0266431	m
FBgn0037531	3R	0.880347	0.000796605	m
FBgn0037541	3R	0.209954	0.0156409	m
FBgn0037552	3R	-0.189613	0.00232581	f
FBgn0037553	3R	-0.831038	8.50878e-10	f
FBgn0037578	3R	0.149451	0.00129647	m
FBgn0037581	3R	0.259388	0.00107378	m
FBgn0037606	3R	0.084537	0.00497002	m
FBgn0037609	3R	-0.117058	0.028952	f
FBgn0037612	3R	-0.340984	0.00294389	f
FBgn0037613	3R	-0.147848	0.0315111	f
FBgn0037643	3R	0.134406	0.00174405	m
FBgn0037646	3R	-0.113542	0.0219801	f
FBgn0037670	3R	-0.206481	0.00373578	f
FBgn0037720	3R	0.209619	0.000421248	m
FBgn0037727	3R	-0.963407	0.00193659	f
FBgn0037734	3R	0.09826	0.0382123	m
FBgn0037739	3R	0.162442	0.00603767	m
FBgn0037743	3R	-0.0563299	0.0451493	f
FBgn0037746	3R	0.4628	0.000210943	m
FBgn0037756	3R	-0.149262	0.0013957	f
FBgn0037770	3R	0.144561	0.0169641	m
FBgn0037773	3R	-0.194113	0.00163374	f
FBgn0037801	3R	-0.936216	2.14674e-06	f
FBgn0037814	3R	0.0994129	0.0401053	m
FBgn0037816	3R	0.14063	0.0422995	m
FBgn0037818	3R	0.267749	5.10373e-05	m
FBgn0037822	3R	0.171807	0.0108463	m
FBgn0037838	3R	0.11304	0.0388067	m
FBgn0037852	3R	-0.157125	1.74763e-10	f
FBgn0037875	3R	-0.130012	0.00762095	f
FBgn0037877	3R	-0.082242	0.03199	f
FBgn0037891	3R	0.205898	6.74011e-07	m
FBgn0037913	3R	-0.637494	1.69984e-12	f
FBgn0037917	3R	-0.115366	0.000109614	f
FBgn0037958	3R	-0.1289	0.0456382	f
FBgn0038002	3R	0.583029	0.00130706	m
FBgn0038013	3R	-0.184999	0.00057911	f
FBgn0038020	3R	0.254585	0.0221152	m
FBgn0038053	3R	0.118756	0.000233769	m
FBgn0038063	3R	-0.171659	0.0387824	f
FBgn0038072	3R	-0.386419	0.0003113	f
FBgn0038074	3R	-0.825986	0.00272057	f
FBgn0038115	3R	-0.424761	5.87927e-11	f
FBgn0038146	3R	-0.110729	0.0276149	f
FBgn0038172	3R	-0.133769	0.0453028	f
FBgn0038180	3R	-0.92005	7.28954e-05	f
FBgn0038194	3R	-1.1479	3.90886e-09	f
FBgn0038195	3R	0.073729	0.00391528	m
FBgn0038214	3R	-0.996612	0.000173411	f
FBgn0038236	3R	0.835002	9.3463e-05	m
FBgn0038248	3R	-0.569594	0.00753023	f
FBgn0038250	3R	-0.674226	0.00670449	f
FBgn0038251	3R	-0.10709	0.00174405	f
FBgn0038256	3R	-0.176889	0.00574172	f
FBgn0038279	3R	0.186678	0.00294389	m
FBgn0038290	3R	-1.04471	0.0239395	f
FBgn0038299	3R	-0.970343	0.00397567	f
FBgn0038304	3R	0.118116	3.25513e-06	m
FBgn0038309	3R	0.523394	0.00171766	m
FBgn0038337	3R	0.423957	3.28071e-05	m
FBgn0038349	3R	-0.187639	0.00300134	f
FBgn0038354	3R	0.306545	6.49413e-08	m
FBgn0038380	3R	0.335112	0.0334124	m
FBgn0038398	3R	2.85633	4.32494e-23	m
FBgn0038407	3R	0.526937	9.65552e-08	m
FBgn0038460	3R	-0.211017	0.0327987	f
FBgn0038462	3R	0.176269	0.019019	m
FBgn0038470	3R	0.237051	0.00527341	m
FBgn0038476	3R	-0.103864	8.10716e-06	f
FBgn0038488	3R	0.0999406	0.00685175	m
FBgn0038516	3R	-1.02156	0.00502549	f
FBgn0038524	3R	-0.142737	2.324e-05	f
FBgn0038533	3R	-0.190609	0.00360187	f
FBgn0038546	3R	-0.129701	0.00300134	f
FBgn0038552	3R	-0.216601	0.0118152	f
FBgn0038564	3R	0.195428	8.12508e-07	m
FBgn0038576	3R	-0.136694	0.0109196	f
FBgn0038638	3R	-0.132101	0.025094	f
FBgn0038641	3R	0.256168	9.12551e-05	m
FBgn0038660	3R	0.207078	0.000931558	m
FBgn0038665	3R	-0.285639	0.000711181	f
FBgn0038706	3R	-1.03159	0.0134412	f
FBgn0038721	3R	0.1851	0.00227727	m
FBgn0038732	3R	0.794783	1.15938e-05	m
FBgn0038734	3R	-0.382163	0.00573649	f
FBgn0038744	3R	-0.32608	0.000540159	f
FBgn0038747	3R	0.120596	0.0045504	m
FBgn0038761	3R	0.634016	0.000518018	m
FBgn0038803	3R	0.0713237	0.0183283	m
FBgn0038818	3R	0.116911	0.00657261	m
FBgn0038829	3R	-0.178079	3.3497e-10	f
FBgn0038832	3R	-1.13191	2.10836e-05	f
FBgn0038837	3R	-0.33695	8.72355e-11	f
FBgn0038874	3R	0.168631	0.0423852	m
FBgn0038894	3R	-0.558594	0.0356082	f
FBgn0038914	3R	-4.06603	5.43308e-28	f
FBgn0038922	3R	0.194992	5.15929e-09	m
FBgn0038956	3R	-0.178453	0.0427793	f
FBgn0038957	3R	-0.172056	0.00039174	f
FBgn0038961	3R	0.111919	0.0078911	m
FBgn0038965	3R	-0.0857598	0.0188269	f
FBgn0039016	3R	0.237957	0.00259606	m
FBgn0039022	3R	-0.613098	0.0308605	f
FBgn0039031	3R	-0.931978	0.0012505	f
FBgn0039051	3R	-1.32109	0.000120082	f
FBgn0039052	3R	-1.18075	0.000722429	f
FBgn0039053	3R	-1.05621	0.00599151	f
FBgn0039083	3R	0.39545	0.000684966	m
FBgn0039094	3R	0.517751	5.15365e-10	m
FBgn0039102	3R	-0.706457	0.0211686	f
FBgn0039109	3R	-0.210142	3.06442e-07	f
FBgn0039115	3R	0.128109	0.0483944	m
FBgn0039136	3R	0.11272	0.00645316	m
FBgn0039145	3R	0.237697	0.00114814	m
FBgn0039149	3R	-0.135528	0.0378071	f
FBgn0039151	3R	-0.982548	0.00136576	f
FBgn0039152	3R	-1.74454	4.27423e-13	f
FBgn0039178	3R	0.284754	0.000101541	m
FBgn0039207	3R	-0.195483	0.00396661	f
FBgn0039223	3R	0.10625	1.78345e-05	m
FBgn0039232	3R	-0.304679	5.9244e-16	f
FBgn0039239	3R	-0.99361	0.0465618	f
FBgn0039249	3R	-0.0982111	0.0179205	f
FBgn0039252	3R	0.115121	0.00399923	m
FBgn0039283	3R	0.118204	0.00841282	m
FBgn0039296	3R	0.134449	0.00839519	m
FBgn0039297	3R	-1.24025	0.0238034	f
FBgn0039307	3R	0.623216	0.00030825	m
FBgn0039308	3R	0.159257	0.00943548	m
FBgn0039312	3R	0.453702	3.91741e-12	m
FBgn0039313	3R	0.210651	0.000903095	m
FBgn0039319	3R	0.251762	0.0148302	m
FBgn0039321	3R	-0.637228	1.07391e-17	f
FBgn0039324	3R	-0.757287	2.76989e-05	f
FBgn0039328	3R	-0.159426	0.024478	f
FBgn0039332	3R	0.28367	7.3178e-11	m
FBgn0039349	3R	0.152328	0.00297568	m
FBgn0039350	3R	-0.241011	1.90675e-19	f
FBgn0039358	3R	0.138146	1.47066e-06	m
FBgn0039385	3R	0.129149	0.00241171	m
FBgn0039464	3R	0.199748	6.14273e-09	m
FBgn0039509	3R	-0.174427	0.00599007	f
FBgn0039531	3R	0.180171	0.00214051	m
FBgn0039552	3R	-1.36286	0.000959702	f
FBgn0039561	3R	0.134252	0.00048834	m
FBgn0039568	3R	1.22043	0.0413478	m
FBgn0039613	3R	-0.822458	5.58948e-05	f
FBgn0039629	3R	-1.20483	7.95126e-06	f
FBgn0039634	3R	0.133488	0.00228222	m
FBgn0039635	3R	0.132356	0.0458669	m
FBgn0039640	3R	-0.244928	1.43816e-07	f
FBgn0039644	3R	-0.252754	3.00978e-08	f
FBgn0039665	3R	-0.276834	0.0412452	f
FBgn0039674	3R	0.14953	0.00244875	m
FBgn0039676	3R	-1.8034	0.000470532	f
FBgn0039678	3R	-4.49633	1.28644e-34	f
FBgn0039685	3R	4.62439	4.05896e-17	m
FBgn0039711	3R	-0.213956	0.0224662	f
FBgn0039714	3R	-0.120602	0.000194032	f
FBgn0039722	3R	-0.332839	0.000213467	f
FBgn0039741	3R	0.0943634	0.0133548	m
FBgn0039756	3R	-0.727862	8.71994e-32	f
FBgn0039790	3R	-0.0944475	4.96108e-08	f
FBgn0039801	3R	1.19537	0.000158234	m
FBgn0039816	3R	0.0656016	0.0497385	m
FBgn0039820	3R	0.3617	0.0116869	m
FBgn0039846	3R	0.121577	0.035575	m
FBgn0039854	3R	0.152694	4.8983e-05	m
FBgn0039861	3R	0.108987	0.00468108	m
FBgn0039876	3R	-0.11684	0.0405689	f
FBgn0039886	3R	-2.05557	1.5446e-61	f
FBgn0039909	4	0.10517	0.0287823	m
FBgn0039915	4	0.195197	0.000105479	m
FBgn0039930	4	0.191709	0.0181521	m
FBgn0039941	X	-0.513444	2.14147e-07	f
FBgn0039946	X	-0.232943	1.21798e-05	f
FBgn0039993	2R	-0.195356	0.000166355	f
FBgn0040001	3L	-0.636033	0.000466609	f
FBgn0040091	2R	-0.356858	0.000540159	f
FBgn0040099	2L	-0.799154	0.0048753	f
FBgn0040102	2L	-1.14769	3.90896e-07	f
FBgn0040153	X	-0.187375	0.00160104	f
FBgn0040212	3R	0.253275	6.75598e-10	m
FBgn0040234	X	0.113847	0.0339718	m
FBgn0040235	X	-0.347252	4.34307e-11	f
FBgn0040237	3R	0.181423	3.35811e-05	m
FBgn0040259	3R	-0.294011	1.77207e-05	f
FBgn0040281	3L	0.0730817	0.0336052	m
FBgn0040299	2L	0.444594	0.00534721	m
FBgn0040321	3L	-0.49559	0.0184551	f
FBgn0040323	3L	-0.181924	0.0419755	f
FBgn0040333	X	4.11167	1.49824e-46	m
FBgn0040336	X	0.652793	6.15309e-18	m
FBgn0040341	X	-1.10148	0.0176326	f
FBgn0040342	X	4.35131	2.06237e-83	m
FBgn0040346	X	0.369006	2.73585e-14	m
FBgn0040347	X	0.443703	4.49301e-13	m
FBgn0040351	X	0.273394	3.60335e-09	m
FBgn0040352	X	-1.18171	0.000966441	f
FBgn0040364	X	0.521516	1.68335e-06	m
FBgn0040373	X	-0.589609	0.0200221	f
FBgn0040376	X	0.24483	0.00291522	m
FBgn0040377	X	0.48337	2.65919e-05	m
FBgn0040382	X	-0.147463	1.71996e-05	f
FBgn0040383	X	-0.189752	0.0383512	f
FBgn0040384	X	-0.62954	2.74474e-143	f
FBgn0040388	X	1.0909	3.09914e-33	m
FBgn0040389	X	0.39543	1.487e-06	m
FBgn0040394	X	-0.144289	0.00221763	f
FBgn0040396	X	-0.416891	2.98133e-06	f
FBgn0040398	X	-1.07596	9.4157e-06	f
FBgn0040465	2R	-0.143595	6.34417e-07	f
FBgn0040467	X	0.260624	0.0023816	m
FBgn0040503	2R	-1.99055	0.0471453	f
FBgn0040529	3R	0.183611	0.0145241	m
FBgn0040600	3R	0.524764	0.000817513	m
FBgn0040651	X	-1.7178	0.00221827	f
FBgn0040697	3L	0.299408	0.0411423	m
FBgn0040726	2R	-0.101938	0.0116042	f
FBgn0040735	2R	-0.817995	0.0150275	f
FBgn0040777	2R	0.0618401	0.022727	m
FBgn0040801	3L	-2.01779	4.81802e-11	f
FBgn0040813	3L	-0.762235	0.0154418	f
FBgn0040859	X	-0.61654	6.03768e-05	f
FBgn0040877	X	-0.356746	7.71224e-09	f
FBgn0040918	X	0.194478	2.31358e-10	m
FBgn0040929	X	0.276249	0.0302802	m
FBgn0040941	X	-7.90708	1.71672e-50	f
FBgn0040942	X	0.320001	0.0237809	m
FBgn0041150	2L	0.133474	0.000778083	m
FBgn0041183	2L	-0.617612	0.000168355	f
FBgn0041186	3R	-0.128515	0.0450786	f
FBgn0041205	2R	-0.097396	0.0188977	f
FBgn0041243	2R	-0.810753	2.62318e-08	f
FBgn0041629	X	-0.356211	1.01128e-10	f
FBgn0041709	3L	-1.0831	0.023762	f
FBgn0041711	3R	1.09005	0.0182513	m
FBgn0041713	2L	0.287157	0.00250118	m
FBgn0042132	X	-0.128926	0.0275922	f
FBgn0042175	2L	-0.115511	0.00101975	f
FBgn0043005	3R	0.210568	1.49507e-05	m
FBgn0043069	3R	-0.279731	0.0049301	f
FBgn0043070	2R	0.142477	6.49123e-05	m
FBgn0043364	2L	-0.471341	3.792e-08	f
FBgn0043456	2L	-0.0727553	0.000512952	f
FBgn0043791	3R	-2.86815	3.94969e-15	f
FBgn0043796	X	-0.112258	0.0110756	f
FBgn0043903	X	0.301833	1.10155e-06	m
FBgn0044047	X	0.376719	4.31617e-08	m
FBgn0044048	3L	-0.661279	9.85082e-08	f
FBgn0044050	3L	-1.58711	3.28987e-39	f
FBgn0044328	3L	0.142989	1.64253e-08	m
FBgn0044810	3R	1.45198	8.36124e-09	m
FBgn0044826	3R	0.166847	0.0395609	m
FBgn0044872	X	1.20553	3.11767e-56	m
FBgn0045038	2L	-0.388321	6.10974e-16	f
FBgn0045800	2R	-0.196462	0.0304209	f
FBgn0045842	2L	-0.172821	0.0449539	f
FBgn0046776	2L	0.449579	8.34832e-05	m
FBgn0046876	3R	-2.48311	2.59011e-09	f
FBgn0046878	3R	-1.59556	2.30405e-08	f
FBgn0050015	2R	0.163761	0.00553275	m
FBgn0050021	2R	0.0627505	0.00530152	m
FBgn0050026	2R	-0.925794	0.0263373	f
FBgn0050046	2R	-1.13913	5.19618e-06	f
FBgn0050053	2R	0.305107	0.00169417	m
FBgn0050065	2R	-1.39018	0.0172052	f
FBgn0050082	2R	0.863913	0.00734287	m
FBgn0050148	2R	-1.78167	7.86808e-06	f
FBgn0050269	2R	-0.429361	0.0321007	f
FBgn0050344	2R	-0.148776	0.000355275	f
FBgn0050350	2R	-0.789885	0.0137803	f
FBgn0050354	2R	0.644818	0.0362732	m
FBgn0050362	2R	-0.831622	0.0449051	f
FBgn0050364	2R	-1.39752	0.000217428	f
FBgn0050384	2R	0.895556	0.0185117	m
FBgn0050424	2R	0.580449	1.03857e-25	m
FBgn0050431	2R	-0.567699	0.000862694	f
FBgn0050432	2R	0.864475	0.025185	m
FBgn0050466	2R	-0.311818	1.24042e-05	f
FBgn0050503	2R	-0.277233	0.00561724	f
FBgn0051053	3R	-0.552629	0.00943548	f
FBgn0051064	3R	0.0960628	0.0266387	m
FBgn0051068	3R	0.255601	0.0449093	m
FBgn0051098	3R	-0.0707578	0.0155407	f
FBgn0051111	3R	-0.157074	0.0223644	f
FBgn0051116	3R	0.120033	0.0138294	m
FBgn0051118	3R	-0.0752202	0.0237809	f
FBgn0051217	3R	-0.648422	0.0019408	f
FBgn0051235	3R	0.240739	0.000185568	m
FBgn0051244	3R	-0.9417	0.0432158	f
FBgn0051274	3R	-0.211429	0.0395302	f
FBgn0051324	3R	-0.160091	0.00300094	f
FBgn0051345	3R	0.273255	1.86297e-08	m
FBgn0051371	3R	0.518117	0.048056	m
FBgn0051414	3R	-0.27151	0.000354525	f
FBgn0051441	3R	-0.180171	0.0329022	f
FBgn0051445	3R	-0.799917	7.30332e-05	f
FBgn0051457	3R	0.183712	0.00740379	m
FBgn0051514	3R	0.244234	0.0403231	m
FBgn0051627	2L	0.205756	0.00658151	m
FBgn0051637	2L	0.135083	1.43816e-07	m
FBgn0051638	2L	0.171145	0.000418852	m
FBgn0051683	2L	-0.138776	0.00139626	f
FBgn0051690	2L	0.166693	0.000450132	m
FBgn0051694	2L	0.0815253	0.0102516	m
FBgn0051708	2L	0.20636	0.0319947	m
FBgn0051710	2L	-0.198703	0.0238627	f
FBgn0051729	2L	0.108004	0.00453851	m
FBgn0051776	2L	-0.324477	0.0196074	f
FBgn0051777	2L	-0.901357	0.000244534	f
FBgn0051778	2L	-1.56999	1.7159e-10	f
FBgn0051849	2L	0.125928	0.0121302	m
FBgn0051866	2L	-0.1581	0.0162889	f
FBgn0051952	2L	-1.53296	0.000483417	f
FBgn0051953	2L	0.269029	0.00115884	m
FBgn0052026	3L	-0.699317	0.00841705	f
FBgn0052099	3L	0.129381	0.0215782	m
FBgn0052107	3L	0.277993	0.0244357	m
FBgn0052119	3L	-1.14166	0.0346463	f
FBgn0052176	3L	-0.0952451	0.0222115	f
FBgn0052179	3L	0.139117	0.00261653	m
FBgn0052183	3L	0.14114	0.000166418	m
FBgn0052195	3L	0.240788	0.017274	m
FBgn0052207	3L	-0.386251	2.40542e-05	f
FBgn0052226	3L	0.0994293	0.0294899	m
FBgn0052280	3L	-0.157953	0.00287039	f
FBgn0052364	3L	0.439298	2.42969e-05	m
FBgn0052392	3L	-0.157025	0.00378385	f
FBgn0052412	3L	-0.369199	0.00844276	f
FBgn0052425	3L	0.197851	4.65192e-06	m
FBgn0052446	3L	0.193928	2.19391e-05	m
FBgn0052450	3L	-1.78387	0.000715073	f
FBgn0052457	3L	-0.576441	0.032442	f
FBgn0052496	X	1.40914	1.78522e-09	m
FBgn0052512	X	0.674601	7.69897e-07	m
FBgn0052521	X	-0.164092	0.00103316	f
FBgn0052533	X	-0.116615	0.0423219	f
FBgn0052537	X	0.151829	0.00286577	m
FBgn0052548	X	-0.735415	0.0194233	f
FBgn0052549	X	-0.169693	2.29864e-11	f
FBgn0052551	X	-1.75309	0.0218778	f
FBgn0052572	X	-1.65899	2.31393e-06	f
FBgn0052573	X	-1.00114	4.53985e-05	f
FBgn0052580	X	2.88478	2.93975e-24	m
FBgn0052581	X	-0.135853	0.000716522	f
FBgn0052591	X	-0.457761	0.00480503	f
FBgn0052601	X	-1.26604	0.0497398	f
FBgn0052625	X	3.21928	2.1675e-12	m
FBgn0052626	X	-0.218766	2.51045e-19	f
FBgn0052636	X	-1.60272	3.71885e-08	f
FBgn0052638	X	0.226517	1.46597e-10	m
FBgn0052655	X	-0.786424	3.46102e-06	f
FBgn0052669	X	-0.291925	0.00231614	f
FBgn0052672	X	-0.115968	0.0379197	f
FBgn0052673	X	-0.969021	0.0156409	f
FBgn0052695	X	-0.923611	0.000415114	f
FBgn0052702	X	-0.292258	0.000303916	f
FBgn0052706	X	0.949306	4.52458e-44	m
FBgn0052713	X	-0.587859	0.00103935	f
FBgn0052732	X	-0.514902	8.66532e-19	f
FBgn0052745	X	0.786032	1.44451e-17	m
FBgn0052750	X	-1.57732	0.0176874	f
FBgn0052756	X	0.321888	1.24487e-08	m
FBgn0052773	X	-0.563694	0.0355209	f
FBgn0052783	X	0.386969	1.24042e-05	m
FBgn0052803	X	-0.362655	8.27606e-06	f
FBgn0052808	X	-0.179571	0.000837779	f
FBgn0052813	X	-0.274978	2.23564e-05	f
FBgn0052814	X	-0.662806	0.0125438	f
FBgn0052823	X	-0.225455	3.09325e-06	f
FBgn0052845	3L	0.287871	0.0353598	m
FBgn0052857	X	-0.447691	4.92079e-18	f
FBgn0053080	X	0.421345	2.89255e-13	m
FBgn0053120	2L	-1.3229	7.5198e-10	f
FBgn0053126	2L	-0.234587	0.0404284	f
FBgn0053145	2R	0.0814595	0.0378071	m
FBgn0053172	X	0.285772	0.00477244	m
FBgn0053177	X	0.809274	0.000197698	m
FBgn0053193	3R	-0.19829	0.0276149	f
FBgn0053223	X	-0.568163	0.010738	f
FBgn0053281	2L	-0.844531	0.00858987	f
FBgn0053301	2L	-2.30407	0.00113983	f
FBgn0053307	2L	-1.20407	0.000270217	f
FBgn0053329	3R	-0.902946	0.0271114	f
FBgn0053476	2R	-2.04383	0.0182542	f
FBgn0053491	X	-0.276682	0.0170253	f
FBgn0053494	3R	-0.887168	4.48678e-05	f
FBgn0053497	X	-1.10785	0.0126759	f
FBgn0053502	X	-0.443815	4.3777e-18	f
FBgn0053517	X	-0.27983	0.00316894	f
FBgn0053519	2R	-0.33611	0.0212984	f
FBgn0053635	2L	-0.182538	0.00182477	f
FBgn0053639	X	-0.166805	0.0189199	f
FBgn0053640	2L	-0.884456	0.0289956	f
FBgn0053642	2L	-1.48999	0.0391029	f
FBgn0053645	2L	-1.7774	0.018506	f
FBgn0053648	2L	1.84965	0.0182314	m
FBgn0053914	2R	-0.371526	0.0165201	f
FBgn0053970	3R	0.634953	1.98189e-06	m
FBgn0054003	2L	-1.04392	0.00256592	f
FBgn0054045	2R	0.526436	0.0404284	m
FBgn0058469	X	-0.41348	0.000447118	f
FBgn0060296	2R	0.214241	0.0234947	m
FBgn0062928	3L	-0.257448	0.0298622	f
FBgn0063083	3L	1.31676	0.00929042	m
FBgn0063494	2R	-0.272298	0.00114933	f
FBgn0063496	2R	0.426531	0.0359033	m
FBgn0063498	2R	0.156123	0.0192562	m
FBgn0063667	3L	-0.612657	0.00424	f
FBgn0063923	3L	-0.455385	0.000318014	f
FBgn0064116	X	0.186304	0.0091887	m
FBgn0064123	X	0.601452	0.031594	m
FBgn0064237	2R	-0.897454	0.000475914	f
FBgn0065032	X	-0.913388	0.00240774	f
FBgn0065035	X	0.403858	3.5959e-05	m
FBgn0066114	X	-0.524519	8.43828e-45	f
FBgn0067102	2R	0.165969	5.13266e-05	m
FBgn0067783	3R	-0.190494	0.0353675	f
FBgn0067861	X	-0.17327	0.00995695	f
FBgn0082924	X	-2.06593	1.76287e-17	f
FBgn0082997	X	-2.56141	1.0051e-20	f
FBgn0082998	X	0.532939	0.0491585	m
FBgn0083013	X	-0.934622	0.0188269	f
FBgn0083027	X	-0.526485	7.5198e-10	f
FBgn0083967	3R	1.1258	0.0165201	m
FBgn0083972	2L	-0.231048	0.0354303	f
FBgn0083987	3L	0.560766	0.00132233	m
FBgn0083991	3R	0.220809	0.00145555	m
FBgn0084017	3L	-0.193829	0.0305097	f
FBgn0084049	2R	0.664515	0.0119112	m
FBgn0085195	2L	-2.06714	1.60384e-10	f
FBgn0085229	2R	0.219693	0.00600894	m
FBgn0085279	3L	0.250873	0.00390772	m
FBgn0085282	3L	-1.1109	0.00402658	f
FBgn0085290	3L	-0.183684	0.026871	f
FBgn0085362	X	-0.441282	0.00943302	f
FBgn0085367	X	0.814106	0.0102516	m
FBgn0085369	2L	-0.143346	0.00378385	f
FBgn0085405	3R	-0.146424	0.0168076	f
FBgn0085425	2R	-0.629548	0.0075207	f
FBgn0085440	X	-0.157736	0.0355209	f
FBgn0085451	X	-0.290826	9.20049e-06	f
FBgn0085453	2R	-0.760534	2.30067e-06	f
FBgn0085478	X	-0.195088	0.0190345	f
FBgn0085638	2R	-0.134575	0.0252276	f
FBgn0085732	2R	-0.718957	6.88286e-05	f
FBgn0086251	2L	-0.240731	0.00921829	f
FBgn0086347	2L	0.15675	0.0439226	m
FBgn0086365	3R	-0.546066	1.67877e-10	f
FBgn0086368	X	-1.59545	2.44235e-10	f
FBgn0086450	X	-0.153749	0.00545987	f
FBgn0086602	X	-0.969028	0.0340144	f
FBgn0086674	X	-0.155585	0.0387824	f
FBgn0086677	2R	0.227311	0.00488036	m
FBgn0086681	2L	0.409298	0.0397272	m
FBgn0086693	X	0.474705	0.000992222	m
FBgn0086695	3R	0.165203	0.045422	m
FBgn0086711	2L	0.348105	1.54948e-05	m
FBgn0086712	2R	0.0967457	0.0208733	m
FBgn0086907	2L	0.570178	0.000773308	m
FBgn0087002	4	-0.418776	0.000927577	f
FBgn0087007	3L	-1.02443	2.00976e-20	f
FBgn0243512	3R	0.197032	0.000171431	m
FBgn0243514	3R	-0.950994	6.61449e-05	f
FBgn0243586	3R	-0.867157	0.0149108	f
FBgn0250731	X	1.90295	0.00146041	m
FBgn0250788	X	0.149911	0.0313567	m
FBgn0250791	3L	0.0715746	0.0321109	m
FBgn0250827	2R	-1.3026	0.000404673	f
FBgn0250835	2L	0.392476	0.0450786	m
FBgn0250839	3R	-0.260463	0.000311716	f
FBgn0250869	X	-0.109925	0.0491585	f
FBgn0250874	X	0.230285	2.53388e-06	m
FBgn0259162	X	-0.255104	3.71051e-05	f
FBgn0259170	X	-0.178238	0.00435816	f
FBgn0259178	3R	-0.104632	0.000120848	f
FBgn0259188	X	-2.48655	1.67738e-11	f
FBgn0259195	X	4.24601	5.35293e-12	m
FBgn0259198	X	1.491	1.60903e-06	m
FBgn0259209	2R	-0.822694	0.00246938	f
FBgn0259223	X	-0.779923	2.74597e-08	f
FBgn0259226	2R	0.631119	4.74842e-06	m
FBgn0259229	2L	-1.71379	0.0266686	f
FBgn0259233	3R	0.702735	6.48288e-28	m
FBgn0259682	2R	-0.454263	0.00520157	f
FBgn0259700	X	0.323502	2.38307e-07	m
FBgn0259715	2L	-0.630308	0.0231026	f
FBgn0259722	X	-0.266031	7.06859e-05	f
FBgn0259741	X	0.671934	0.013971	m
FBgn0259849	211000022278436	4.80813	7.82357e-12	m
FBgn0259878	2R	0.187966	0.0220652	m
FBgn0259896	2L	-1.13153	4.68525e-08	f
FBgn0259923	X	-0.195833	0.000103158	f
FBgn0259933	3L	0.083274	0.0189165	m
FBgn0259937	2R	-0.166983	0.000246068	f
FBgn0259979	2R	-0.0905903	0.0201533	f
FBgn0259993	X	-0.888335	4.20977e-36	f
FBgn0260008	3L	0.27214	0.000143843	m
FBgn0260011	2L	-0.902713	5.12598e-07	f
FBgn0260229	3R	-0.180016	0.00451899	f
FBgn0260238	X	1.56894	0.00223208	m
FBgn0260429	2R	-0.451401	0.000805217	f
FBgn0260450	X	1.28862	1.09861e-73	m
FBgn0260461	3L	-0.243556	0.00186213	f
FBgn0260484	X	0.263215	4.87945e-24	m
FBgn0260632	2L	-1.46941	1.30988e-21	f
FBgn0260658	X	0.188625	0.0193716	m
FBgn0260722	3R	-0.218665	0.0476381	f
FBgn0260742	3R	0.0474305	0.01888	m
FBgn0260743	3R	0.0707252	0.0250418	m
FBgn0260745	3R	0.152379	0.00357695	m
FBgn0260747	X	-0.189421	0.00254589	f
FBgn0260748	X	0.301104	5.80257e-06	m
FBgn0260750	2L	0.115771	0.0248892	m
FBgn0260753	X	-0.171424	6.40799e-05	f
FBgn0260756	3L	-0.189358	0.00214051	f
FBgn0260766	3R	-0.276955	0.00608011	f
FBgn0260770	2R	-0.261803	0.00013382	f
FBgn0260789	X	0.232267	0.0466069	m
FBgn0260795	3L	0.0875556	0.0394957	m
FBgn0260817	2L	0.176667	0.000158234	m
FBgn0260874	3L	-0.261234	0.00460315	f
FBgn0260944	3R	-0.120392	0.0120226	f
FBgn0260954	2L	-1.62439	0.0258221	f
FBgn0260959	2R	-0.226235	0.017471	f
FBgn0260960	3L	0.067559	0.0495007	m
FBgn0260964	2R	0.292833	0.014471	m
FBgn0261004	3R	-0.518775	6.73706e-10	f
FBgn0261245	X	0.538542	2.29975e-05	m
FBgn0261261	3R	0.136771	0.0123088	m
FBgn0261276	2R	0.15891	4.70997e-06	m
FBgn0261277	X	0.479525	0.0413774	m
FBgn0261278	2L	0.0706176	0.0123667	m
FBgn0261284	X	0.488801	0.00203763	m
FBgn0261380	3R	0.106169	0.0294799	m
FBgn0261393	3R	-0.260289	0.0314387	f
FBgn0261395	3R	0.820402	0.0219944	m
FBgn0261429	2R	-1.85794	0.00231614	f
FBgn0261439	2R	0.0982641	0.00795998	m
FBgn0261444	X	0.410868	0.0179827	m
FBgn0261445	3L	-0.114698	6.27286e-05	f
FBgn0261456	2R	0.115676	0.00141131	m
FBgn0261477	2R	-0.140637	0.000162017	f
FBgn0261505	2R	-0.445689	0.0122464	f
FBgn0261522	X	4.05215	1.21387e-05	m
FBgn0261524	X	0.156295	5.09987e-08	m
FBgn0261550	3R	0.108687	0.0211097	m
FBgn0261560	2L	-0.667548	0.00457674	f
FBgn0261562	3L	-0.24522	9.71864e-11	f
FBgn0261563	2L	0.269431	0.0128236	m
FBgn0261565	3L	0.139181	3.21922e-05	m
FBgn0261573	X	0.104841	0.0425729	m
FBgn0261575	3R	-1.51592	4.95762e-05	f
FBgn0261584	2R	-0.74021	0.000114176	f
FBgn0261625	2R	0.181132	5.38711e-06	m
FBgn0261628	2L	-1.10913	5.05689e-05	f
FBgn0261673	2R	-0.181839	0.0308605	f
FBgn0261674	3L	0.146544	0.00610909	m
FBgn0261704	3R	0.213721	0.00258331	m
FBgn0261791	X	0.284202	0.000101902	m
FBgn0261799	3L	-1.43723	0.00973119	f
FBgn0261805	2L	-0.585949	0.0274981	f
FBgn0261834	X	0.331797	0.0115545	m
FBgn0261837	3R	-0.21064	0.000483735	f
FBgn0261862	2R	-0.139443	0.000187232	f
FBgn0261930	X	-0.672378	9.2379e-05	f
FBgn0261953	3L	-0.137111	0.00339528	f
FBgn0261955	X	0.116072	0.0275026	m
FBgn0261989	2R	-0.963227	0.0403231	f
FBgn0262103	2R	0.245316	0.00163447	m
FBgn0262116	2R	0.163741	0.0346688	m
FBgn0262123	2R	-0.273023	0.0145241	f
FBgn0262178	X	1.59286	0.0394957	m
FBgn0262266	X	-1.04067	0.012466	f
FBgn0262307	2R	0.378984	0.0412707	m
FBgn0262353	2L	-0.79322	0.000383185	f
FBgn0262467	2L	0.195912	0.0117375	m
FBgn0262532	3L	-0.896541	0.00314297	f
FBgn0262533	3L	-1.5251	0.00573826	f
FBgn0262560	2R	-0.206786	0.00673998	f
FBgn0262579	3L	0.201036	0.000107899	m
FBgn0262599	2L	0.275159	0.0324208	m
FBgn0262656	X	-0.534106	8.06938e-12	f
FBgn0262685	X	-0.297408	0.00246178	f
FBgn0262699	X	-0.0908137	7.32746e-05	f
[truncated: 237 more rows]

## Sheet: Dsim
Sex-biased genes in D. simulans
gene_id	chrom	log2fc	qval	sex
FBgn0012846	Scf_X	-0.357298	2.6732e-09	f
FBgn0012849	Scf_X	0.299853	0.032461	m
FBgn0012859	Scf_X	-7.01288	0	f
FBgn0012860	Scf_X	0.656124	0.00206075	m
FBgn0012866	Scf_4	-0.316728	0.00293374	f
FBgn0012901	Scf_3L	-0.448754	5.05254e-07	f
FBgn0015169	Scf_X	0.491652	0.00020144	m
FBgn0016343	Scf_X	-1.11037	3.5509e-17	f
FBgn0018282	Scf_X	-1.28669	4.559e-05	f
FBgn0020700	Scf_3R	0.19383	0.014138	m
FBgn0022517	Scf_4	0.177953	0.00557375	m
FBgn0024395	Scf_X	0.584012	1.13561e-05	m
FBgn0025031	Scf_3R	-0.184236	0.0181728	f
FBgn0041270	Scf_X	-0.305756	2.99469e-06	f
FBgn0041659	Scf_X	0.984346	0.00728214	m
FBgn0041663	Scf_X	0.443021	0.0244672	m
FBgn0041665	Scf_3R	-0.173634	0.0170617	f
FBgn0041666	Scf_X	-0.258499	0.0179013	f
FBgn0041673	Scf_3R	0.132955	0.00363809	m
FBgn0041892	Scf_3R	0.856982	0.000453117	m
FBgn0042857	Scf_X	0.256198	0.00060118	m
FBgn0042859	Scf_X	1.72265	1.12512e-07	m
FBgn0043395	Scf_3R	-1.29378	9.46839e-63	f
FBgn0045541	Scf_2L	0.170404	5.14604e-05	m
FBgn0045611	Scf_3R	0.127149	0.0195975	m
FBgn0063984	Scf_2R	-0.191801	0.00421873	f
FBgn0063993	Scf_X	0.772783	0.0169731	m
FBgn0066168	Scf_2L	-0.170607	0.0301942	f
FBgn0067172	Scf_3R	0.351851	0.000155733	m
FBgn0067177	Scf_2L	0.201695	0.0212859	m
FBgn0067495	Scf_2R	-0.234613	0.0455407	f
FBgn0068584	Scf_X	-0.178838	0.0216152	f
FBgn0068586	Scf_X	-0.200909	6.54012e-10	f
FBgn0068590	Scf_X	-0.261823	0.0180595	f
FBgn0068654	Scf_X	-0.413521	2.91386e-14	f
FBgn0068655	Scf_X	-0.14414	0.0337229	f
FBgn0068656	Scf_X	-0.408463	0.0129	f
FBgn0068659	Scf_X	-0.268222	4.4268e-12	f
FBgn0068685	Scf_X	0.467738	1.115e-10	m
FBgn0068698	Scf_X	-0.116908	0.0237816	f
FBgn0069480	Scf_3R	-0.149806	0.00761619	f
FBgn0069498	Scf_4	-0.263996	6.85565e-05	f
FBgn0082753	Scf_2R	0.303107	0.0148508	m
FBgn0083416	Scf_3R	0.125599	0.0499083	m
FBgn0083441	Scf_3L	0.223584	0.0238058	m
FBgn0083467	Scf_X	0.796355	1.71911e-37	m
FBgn0083468	Scf_3R	-0.438216	0.00924472	f
FBgn0083472	Scf_X	-0.569087	1.06053e-06	f
FBgn0084063	Scf_X	0.190885	0.000412553	m
FBgn0084108	Scf_X	1.58208	3.53909e-32	m
FBgn0084335	Scf_3R	0.287657	0.00406407	m
FBgn0084546	Scf_2R	-0.264822	0.0273646	f
FBgn0084635	Scf_X	0.246445	0.00399164	m
FBgn0084645	Scf_X	0.132666	0.0372983	m
FBgn0085863	Scf_2R	-0.241336	2.0713e-06	f
FBgn0085876	Scf_X	1.27	9.41784e-12	m
FBgn0085901	Scf_X	0.226867	0.00931299	m
FBgn0085902	Scf_X	0.535052	6.42929e-13	m
FBgn0085956	Scf_2L	0.31822	0.000364862	m
FBgn0085958	Scf_3L	0.241138	0.0337229	m
FBgn0085963	Scf_2R	0.356633	3.85086e-05	m
FBgn0085967	Scf_X	-0.169073	0.00098393	f
FBgn0085975	Scf_2L	-0.581618	0.00395215	f
FBgn0181842	Scf_2R	0.414387	0.0238072	m
FBgn0181853	Scf_2R	-0.254453	9.75967e-05	f
FBgn0181891	Scf_2R	1.57911	0.000273116	m
FBgn0181953	Scf_2R	0.174881	0.0228544	m
FBgn0181954	Scf_2R	0.280892	0.0139862	m
FBgn0181985	Scf_2R	0.118045	0.022285	m
FBgn0182029	Scf_2R	-0.115577	0.0208119	f
FBgn0182038	Scf_2R	-0.510488	0.0329953	f
FBgn0182076	Scf_2R	0.279696	0.00363809	m
FBgn0182091	Scf_2R	-1.68689	1.41547e-23	f
FBgn0182092	Scf_2R	0.191677	0.00166192	m
FBgn0182100	Scf_2R	0.115495	0.0389276	m
FBgn0182137	Scf_2R	-0.303384	0.00389894	f
FBgn0182156	Scf_2R	0.328095	0.000994357	m
FBgn0182164	Scf_2R	0.136331	0.00598107	m
FBgn0182187	Scf_2R	0.357499	0.00769232	m
FBgn0182188	Scf_2R	-0.195895	0.0412463	f
FBgn0182215	Scf_2R	-0.219095	0.00895788	f
FBgn0182221	Scf_2R	0.13952	0.0447019	m
FBgn0182318	Scf_2R	0.118827	0.00513548	m
FBgn0182326	Scf_X	-0.143182	0.000928465	f
FBgn0182332	Scf_2R	0.637924	0.00393039	m
FBgn0182338	Scf_2R	-0.233376	0.000110801	f
FBgn0182374	Scf_2R	-0.268934	0.0274523	f
FBgn0182378	Scf_2R	-0.116169	0.0424266	f
FBgn0182386	Scf_2R	0.241173	0.0197305	m
FBgn0182400	Scf_2R	0.278837	0.00686405	m
FBgn0182402	Scf_2R	-0.523717	6.56788e-07	f
FBgn0182432	Scf_2R	0.234134	0.0067762	m
FBgn0182462	Scf_2R	-0.281368	0.0156242	f
FBgn0182467	Scf_2R	-0.14287	0.0016901	f
FBgn0182475	Scf_2R	0.294665	0.0255839	m
FBgn0182499	Scf_2R	-2.17544	1.58376e-27	f
FBgn0182519	Scf_2R	0.268884	0.0347175	m
FBgn0182543	Scf_2R	1.40597	0.0191029	m
FBgn0182549	Scf_2R	0.265853	0.0233072	m
FBgn0182562	Scf_2R	-0.279913	0.00810603	f
FBgn0182570	Scf_2R	-0.2828	0.0197305	f
FBgn0182573	Scf_2R	-0.173922	0.0297273	f
FBgn0182584	Scf_2R	-0.195762	0.000472548	f
FBgn0182599	Scf_2R	-0.283782	8.5312e-15	f
FBgn0182612	Scf_2R	-0.195251	0.00609221	f
FBgn0182622	Scf_2R	-0.117039	0.0449334	f
FBgn0182640	Scf_2R	1.08039	0.0391452	m
FBgn0182666	Scf_2R	-0.188513	0.0021091	f
FBgn0182673	Scf_2R	0.131952	0.00994714	m
FBgn0182680	Scf_2R	0.149736	0.0388415	m
FBgn0182707	Scf_2R	0.134584	0.0490869	m
FBgn0182715	Scf_2R	-0.164543	0.00270314	f
FBgn0182729	Scf_2R	0.236315	0.000109409	m
FBgn0182756	Scf_2R	0.144937	0.00992446	m
FBgn0182768	Scf_3L	-0.381982	0.00534962	f
FBgn0182792	Scf_2R	-0.540067	0.00316477	f
FBgn0182832	Scf_2R	0.253923	0.00919313	m
FBgn0182838	Scf_2R	0.116362	0.0170243	m
FBgn0182880	Scf_2R	0.215588	0.00332272	m
FBgn0182914	Scf_2R	-0.324003	5.45764e-05	f
FBgn0182916	Scf_2R	0.771215	0.00469009	m
FBgn0182926	Scf_2R	0.332155	0.000265998	m
FBgn0182931	Scf_2R	0.298705	0.00675675	m
FBgn0182934	Scf_2R	0.287059	0.0159984	m
FBgn0182958	Scf_2R	0.679238	0.00953979	m
FBgn0182960	Scf_2R	-0.412677	0.000381032	f
FBgn0182992	Scf_2R	-0.249276	0.0122291	f
FBgn0183001	Scf_2R	0.227271	0.000115819	m
FBgn0183002	Scf_2R	0.358775	0.031209	m
FBgn0183013	Scf_2R	0.245957	0.00852618	m
FBgn0183017	Scf_2R	0.954566	7.94094e-150	m
FBgn0183024	Scf_2R	0.54349	0.0124852	m
FBgn0183039	Scf_2R	-0.327611	0.00918999	f
FBgn0183072	Scf_2R	-0.448655	0.00146955	f
FBgn0183092	Scf_2R	0.178532	0.000295387	m
FBgn0183133	Scf_2R	-0.244216	1.15072e-05	f
FBgn0183147	Scf_2R	-0.437344	0.0223733	f
FBgn0183196	Scf_2R	-0.373994	4.41967e-06	f
FBgn0183227	Scf_2R	-1.29731	0.00104088	f
FBgn0183236	Scf_2R	-0.6628	0.0388312	f
FBgn0183297	Scf_2R	-0.234638	9.50034e-07	f
FBgn0183298	Scf_2R	0.289354	0.00545668	m
FBgn0183301	Scf_2R	-0.198582	0.000594092	f
FBgn0183302	Scf_2R	-0.530555	0.0376203	f
FBgn0183336	Scf_2R	-1.72924	1.96756e-05	f
FBgn0183350	Scf_2R	-0.210332	0.00117337	f
FBgn0183418	Scf_2R	0.780503	0.0468491	m
FBgn0183421	Scf_2R	-0.188273	0.0397731	f
FBgn0183444	Scf_2R	0.251642	0.0015327	m
FBgn0183518	Scf_2R	-0.276393	0.024801	f
FBgn0183528	Scf_2R	0.308579	2.2211e-06	m
FBgn0183530	Scf_2R	-0.215529	0.0056544	f
FBgn0183570	Scf_2R	-0.186747	0.00854971	f
FBgn0183577	Scf_2R	-0.219903	0.00433219	f
FBgn0183587	Scf_2R	-0.19072	0.0207556	f
FBgn0183610	Scf_2R	-0.252159	7.27706e-05	f
FBgn0183629	Scf_2R	0.263212	0.00205206	m
FBgn0183640	Scf_2R	-0.229026	0.0010632	f
FBgn0183667	Scf_2L	-0.394658	0.000372443	f
FBgn0183669	Scf_3L	0.206076	0.0169731	m
FBgn0183681	Scf_3L	-0.300526	0.0124036	f
FBgn0183683	Scf_2R	-0.291459	0.00328494	f
FBgn0183705	Scf_2L	-0.622825	0.00212395	f
FBgn0183730	Scf_2L	-0.199368	6.61508e-05	f
FBgn0183756	Scf_X	-0.365138	0.000488567	f
FBgn0183783	Scf_3L	-0.255126	0.00364821	f
FBgn0183793	Scf_3L	-0.382374	0.01382	f
FBgn0183810	Scf_3L	0.21353	7.52295e-05	m
FBgn0183822	Scf_3L	0.239293	0.0155728	m
FBgn0183840	Scf_3L	-0.248932	7.4082e-06	f
FBgn0183843	Scf_3L	0.375796	3.17788e-09	m
FBgn0183875	Scf_3L	0.24372	0.0015039	m
FBgn0183883	Scf_3L	0.278676	8.62807e-05	m
FBgn0183916	Scf_3L	-0.358519	0.000304152	f
FBgn0183923	Scf_3L	0.112538	0.0489079	m
FBgn0183926	Scf_3L	0.11302	0.0344232	m
FBgn0183938	Scf_3L	0.148691	0.00588762	m
FBgn0183956	Scf_X	0.27384	0.0018721	m
FBgn0183980	Scf_3L	0.121061	0.0297257	m
FBgn0183995	Scf_X	-0.25307	0.000230251	f
FBgn0184001	Scf_3L	0.120659	0.0329953	m
FBgn0184009	Scf_3L	0.191368	0.00154403	m
FBgn0184025	Scf_3L	-0.357059	0.0343642	f
FBgn0184028	Scf_3L	-0.235201	0.00555594	f
FBgn0184059	Scf_3L	-0.302491	0.0197305	f
FBgn0184085	Scf_3L	-0.271952	0.00956394	f
FBgn0184089	Scf_3L	-0.328418	0.032129	f
FBgn0184090	Scf_3L	-0.268261	0.0188936	f
FBgn0184100	Scf_3L	0.185219	0.0458954	m
FBgn0184115	Scf_3L	0.511267	0.0327879	m
FBgn0184122	Scf_3L	-0.851932	0.0233842	f
FBgn0184136	Scf_3L	0.13134	0.00345415	m
FBgn0184137	Scf_3L	0.255338	0.000300178	m
FBgn0184142	Scf_3L	-0.311983	0.0114167	f
FBgn0184154	Scf_3L	0.183175	0.000556573	m
FBgn0184155	Scf_3L	-0.285362	0.0480721	f
FBgn0184173	Scf_3L	0.143909	0.0438377	m
FBgn0184200	Scf_3L	-0.237932	0.000203755	f
FBgn0184210	Scf_3L	0.788509	0.0180595	m
FBgn0184239	Scf_3L	-0.320738	0.0183796	f
FBgn0184259	Scf_3L	-0.36294	0.00320342	f
FBgn0184261	Scf_3L	-0.394764	2.60439e-05	f
FBgn0184262	Scf_3L	-0.205654	0.0228471	f
FBgn0184325	Scf_3L	-0.202181	0.000883451	f
FBgn0184340	Scf_3L	-0.192702	0.0200086	f
FBgn0184343	Scf_3L	-0.281663	0.0249547	f
FBgn0184344	Scf_3L	-0.457467	0.00134793	f
FBgn0184347	Scf_3L	-0.286525	0.000650825	f
FBgn0184378	Scf_3L	-0.325931	0.000383081	f
FBgn0184408	Scf_3L	0.317873	0.00173091	m
FBgn0184435	Scf_3L	0.223124	0.00146256	m
FBgn0184437	Scf_3L	-0.109498	0.0257913	f
FBgn0184453	Scf_3L	0.157641	0.0197305	m
FBgn0184477	Scf_3L	-0.16671	0.00322551	f
FBgn0184505	Scf_3L	-4.13329	0.000159683	f
FBgn0184540	Scf_3L	-0.225252	0.000655049	f
FBgn0184545	Scf_3L	0.170496	0.041709	m
FBgn0184549	Scf_3L	0.813866	0.0195399	m
FBgn0184553	Scf_3L	-0.195223	0.0352098	f
FBgn0184561	Scf_3L	0.363353	4.24362e-10	m
FBgn0184590	Scf_3L	-0.80781	0.0137156	f
FBgn0184617	Scf_3L	-1.17894	8.15836e-07	f
FBgn0184627	Scf_3L	-0.10658	0.0449811	f
FBgn0184651	Scf_3L	0.101914	0.00687806	m
FBgn0184666	Scf_3L	-0.224218	0.0282241	f
FBgn0184677	Scf_3L	0.262343	0.00206075	m
FBgn0184709	Scf_3L	-0.246967	0.022452	f
FBgn0184736	Scf_3L	0.250173	0.00854971	m
FBgn0184754	Scf_3L	-0.296294	6.70602e-06	f
FBgn0184757	Scf_3L	-0.374438	0.043784	f
FBgn0184796	Scf_3L	-0.0937352	0.00295363	f
FBgn0184805	Scf_3L	-1.14842	0.0367411	f
FBgn0184824	Scf_3L	0.258284	0.0128269	m
FBgn0184826	Scf_3L	0.230558	0.01203	m
FBgn0184838	Scf_3L	-0.469757	1.1623e-12	f
FBgn0184854	Scf_3L	-0.313444	1.06376e-05	f
FBgn0184863	Scf_3L	-0.263561	0.00803644	f
FBgn0184892	Scf_3L	-0.567004	0.00436137	f
FBgn0184915	Scf_3L	-0.698795	4.61469e-14	f
FBgn0184922	Scf_3L	0.229417	0.0195975	m
FBgn0184924	Scf_3L	0.100386	0.00446342	m
FBgn0184950	Scf_3L	0.204552	0.0170513	m
FBgn0184961	Scf_3L	0.212798	0.0105006	m
FBgn0185009	Scf_3L	0.149787	0.000311082	m
FBgn0185014	Scf_3L	0.207878	2.85646e-09	m
FBgn0185032	Scf_3L	0.444453	2.51109e-07	m
FBgn0185062	Scf_3L	-0.189741	0.0256564	f
FBgn0185069	Scf_3L	0.295115	0.000756603	m
FBgn0185075	Scf_3L	-0.256288	1.75995e-06	f
FBgn0185080	Scf_3L	-0.357275	0.0192174	f
FBgn0185096	Scf_3L	0.242143	7.79801e-08	m
FBgn0185101	Scf_3L	0.259255	0.0121884	m
FBgn0185108	Scf_3L	0.195848	0.00418342	m
FBgn0185133	Scf_3L	-0.258305	0.00126637	f
FBgn0185154	Scf_3L	-3.33996	4.75548e-106	f
FBgn0185194	Scf_3L	0.697249	0.0368297	m
FBgn0185202	Scf_3L	0.376449	0.0405565	m
FBgn0185226	Scf_3L	-0.269984	0.00678632	f
FBgn0185247	Scf_3L	0.126566	0.0201083	m
FBgn0185248	Scf_3L	-0.809415	0.000120425	f
FBgn0185259	Scf_3L	-1.61821	7.72493e-52	f
FBgn0185281	Scf_3L	-0.195502	0.0228953	f
FBgn0185290	Scf_3L	-0.115649	0.000110801	f
FBgn0185319	Scf_3L	-2.00252	3.35688e-07	f
FBgn0185334	Scf_3L	-0.207298	0.0423221	f
FBgn0185351	Scf_3L	0.29888	0.00189471	m
FBgn0185389	Scf_3L	-0.173447	0.0177797	f
FBgn0185395	Scf_3L	-0.177711	0.00952616	f
FBgn0185404	Scf_3L	0.253217	0.00262011	m
FBgn0185413	Scf_3L	0.157658	0.0447271	m
FBgn0185418	Scf_3L	-0.234455	0.0497394	f
FBgn0185428	Scf_3L	0.157491	0.0301527	m
FBgn0185432	Scf_3L	-0.277376	0.000462463	f
FBgn0185471	Scf_2R	-0.232322	0.0318026	f
FBgn0185480	Scf_3L	0.223272	0.00119649	m
FBgn0185494	Scf_3L	-0.270711	0.0323367	f
FBgn0185524	Scf_3L	0.268053	0.0124838	m
FBgn0185540	Scf_3L	-0.16735	0.000555142	f
FBgn0185553	Scf_3L	0.229537	0.00179867	m
FBgn0185560	Scf_3L	0.197804	0.0286877	m
FBgn0185580	Scf_3L	0.231687	0.00122481	m
FBgn0185586	Scf_3L	-0.144509	0.0274782	f
FBgn0185596	Scf_3L	0.159438	0.0367411	m
FBgn0185684	Scf_3L	-0.265195	0.0472964	f
FBgn0185700	Scf_3L	0.143934	0.0434306	m
FBgn0185706	Scf_3L	-0.256876	1.41544e-05	f
FBgn0185725	Scf_3L	-0.279622	0.000364585	f
FBgn0185726	Scf_3L	-0.337413	1.17803e-05	f
FBgn0185753	Scf_3L	-0.121552	0.0132422	f
FBgn0185775	Scf_3L	-0.229677	0.00406407	f
FBgn0185884	Scf_3L	-0.20171	0.0409776	f
FBgn0185899	Scf_3L	-0.198396	0.00186721	f
FBgn0185900	Scf_3L	0.308643	0.00104088	m
FBgn0185904	Scf_3L	-0.50692	0.00414517	f
FBgn0185911	Scf_3L	-0.305062	0.000155074	f
FBgn0185960	Scf_3L	-0.16834	1.14456e-05	f
FBgn0185971	Scf_3L	0.234822	0.0152204	m
FBgn0185979	Scf_3L	-1.00318	1.64107e-55	f
FBgn0185984	Scf_3L	-0.239672	0.021162	f
FBgn0185997	Scf_3L	0.184532	0.041627	m
FBgn0186002	Scf_3L	0.127657	0.0187402	m
FBgn0186011	Scf_3L	-0.281475	0.03559	f
FBgn0186049	Scf_3L	-0.298591	0.0101814	f
FBgn0186104	Scf_3L	0.300178	0.00146955	m
FBgn0186173	Scf_3L	0.221372	0.000193221	m
FBgn0186176	Scf_3L	-0.25387	0.0249547	f
FBgn0186199	Scf_3L	0.216095	0.000380185	m
FBgn0186203	Scf_3L	0.202055	2.44094e-05	m
FBgn0186206	Scf_3L	-0.719735	2.61297e-05	f
FBgn0186211	Scf_3L	0.144631	0.0311945	m
FBgn0186212	Scf_3L	0.245158	0.000138487	m
FBgn0186254	Scf_3L	-0.442074	0.0288031	f
FBgn0186263	Scf_3L	0.269792	0.000159002	m
FBgn0186268	Scf_3L	0.162882	0.0476025	m
FBgn0186311	Scf_3L	0.239521	0.0176494	m
FBgn0186327	Scf_3L	0.296055	0.000119128	m
FBgn0186382	Scf_3L	0.268806	0.0140575	m
FBgn0186384	Scf_3L	0.173119	0.0433453	m
FBgn0186400	Scf_3L	0.100216	0.0286877	m
FBgn0186405	Scf_3L	0.216103	0.00052633	m
FBgn0186489	Scf_3L	-0.178576	0.00775162	f
FBgn0186510	Scf_3L	0.131927	0.0318258	m
FBgn0186521	Scf_3L	0.13763	0.0228953	m
FBgn0186522	Scf_3L	-0.215631	0.0183796	f
FBgn0186530	Scf_3L	0.338891	0.00641457	m
FBgn0186564	Scf_3L	0.281525	7.68199e-05	m
FBgn0186569	Scf_3L	0.147823	0.000372443	m
FBgn0186578	Scf_3L	-0.25053	0.0119075	f
FBgn0186580	Scf_3L	0.234691	0.00138328	m
FBgn0186597	Scf_3L	-0.324264	0.0119844	f
FBgn0186607	Scf_3L	0.125494	0.03339	m
FBgn0186654	Scf_3L	0.825022	4.53583e-06	m
FBgn0186656	Scf_3L	0.182314	0.00166839	m
FBgn0186681	Scf_3L	0.206183	1.15699e-05	m
FBgn0186703	Scf_3L	-0.256317	0.00126173	f
FBgn0186730	Scf_3L	0.176655	0.0423564	m
FBgn0186735	Scf_3L	-0.137311	0.0474628	f
FBgn0186738	Scf_3L	-0.380828	0.0164596	f
FBgn0186745	Scf_3R	-0.128646	0.01203	f
FBgn0186747	Scf_3R	0.15832	0.0372873	m
FBgn0186756	Scf_3R	0.290411	0.00506493	m
FBgn0186758	Scf_3R	-0.211357	0.0369761	f
FBgn0186759	Scf_3R	-0.129168	0.00119659	f
FBgn0186763	Scf_3R	-0.631366	1.0883e-05	f
FBgn0186764	Scf_3R	-0.897329	8.4713e-12	f
FBgn0186770	Scf_3R	0.586187	0.000534755	m
FBgn0186778	Scf_3R	-0.112917	0.0244429	f
FBgn0186806	Scf_3R	0.182145	0.0293394	m
FBgn0186812	Scf_2R	-0.264243	1.24678e-05	f
FBgn0186867	Scf_2R	-0.42512	0.00955896	f
FBgn0186901	Scf_2R	0.178394	2.14461e-09	m
FBgn0186924	Scf_2R	0.301937	5.00207e-05	m
FBgn0186968	Scf_2R	-0.147625	0.0162171	f
FBgn0187023	Scf_2R	-0.287711	0.00517024	f
FBgn0187108	Scf_2R	0.182898	0.0154244	m
FBgn0187131	Scf_2R	0.161818	0.0413518	m
FBgn0187134	Scf_NODE_62956	-0.318533	5.76191e-06	f
FBgn0187136	Scf_2R	-0.136365	0.00588762	f
FBgn0187137	Scf_2R	-0.477134	4.99643e-05	f
FBgn0187141	Scf_4	-0.423122	6.11429e-09	f
FBgn0187142	Scf_4	-0.329477	8.09324e-06	f
FBgn0187143	Scf_4	-0.427726	5.7314e-09	f
FBgn0187150	Scf_X	-1.27438	0.00803147	f
FBgn0187152	Scf_X	-0.135559	0.0392626	f
FBgn0187155	Scf_NODE_37002	-0.205796	0.000291209	f
FBgn0187156	Scf_NODE_13260	-0.21242	0.000137423	f
FBgn0187157	Scf_NODE_13320	-0.197399	0.00955896	f
FBgn0187165	Scf_X	-0.244868	2.31914e-05	f
FBgn0187168	Scf_X	0.504716	2.12714e-07	m
FBgn0187175	Scf_X	0.589189	3.83864e-06	m
FBgn0187181	Scf_X	1.04191	2.78263e-22	m
FBgn0187182	Scf_X	-0.279396	1.99357e-06	f
FBgn0187216	Scf_X	-0.218637	8.63669e-05	f
FBgn0187231	Scf_X	0.881314	3.40254e-16	m
FBgn0187234	Scf_X	0.295201	0.0185056	m
FBgn0187246	Scf_X	-0.368892	0.0275134	f
FBgn0187253	Scf_X	0.379225	3.30038e-08	m
FBgn0187256	Scf_X	-0.412738	0.0080013	f
FBgn0187267	Scf_X	-0.261923	0.000137728	f
FBgn0187276	Scf_X	0.632395	2.81446e-14	m
FBgn0187282	Scf_NODE_39788	0.270534	0.00020144	m
FBgn0187301	Scf_X	-0.257651	7.89659e-12	f
FBgn0187309	Scf_X	-0.886512	0.000650825	f
FBgn0187324	Scf_X	1.50151	6.91049e-13	m
FBgn0187337	Scf_X	0.223631	0.020601	m
FBgn0187338	Scf_X	0.287997	0.000932144	m
FBgn0187340	Scf_X	-0.28636	0.00154862	f
FBgn0187342	Scf_X	-0.362638	5.69996e-16	f
FBgn0187380	Scf_X	0.426804	0.000138749	m
FBgn0187384	Scf_X	0.775207	1.23049e-08	m
FBgn0187388	Scf_X	-0.352835	0.0432896	f
FBgn0187393	Scf_X	-0.578618	0.000372443	f
FBgn0187394	Scf_X	0.110028	0.00966513	m
FBgn0187395	Scf_X	0.607598	0.00462544	m
FBgn0187406	Scf_X	-0.151714	0.0156242	f
FBgn0187408	Scf_X	-0.380052	0.0137156	f
FBgn0187422	Scf_X	-0.232363	0.0104817	f
FBgn0187435	Scf_X	-0.146565	0.00161807	f
FBgn0187443	Scf_X	0.424157	0.0377507	m
FBgn0187451	Scf_X	-0.193274	2.20942e-05	f
FBgn0187456	Scf_X	0.255768	0.00222901	m
FBgn0187460	Scf_X	0.173571	0.00742113	m
FBgn0187465	Scf_X	-0.519635	0.000123709	f
FBgn0187467	Scf_X	0.338359	7.16511e-08	m
FBgn0187468	Scf_X	0.522663	0.0237198	m
FBgn0187482	Scf_X	0.320462	2.51617e-06	m
FBgn0187497	Scf_X	-0.371083	0.000956639	f
FBgn0187503	Scf_X	0.508283	7.89522e-09	m
FBgn0187509	Scf_X	-0.213524	0.000317276	f
FBgn0187513	Scf_X	1.87451	3.75787e-29	m
FBgn0187528	Scf_NODE_24415	0.22765	4.65788e-06	m
FBgn0187529	Scf_X	0.108608	0.0293394	m
FBgn0187535	Scf_X	-3.18831	6.14371e-05	f
FBgn0187547	Scf_X	0.43138	9.21581e-08	m
FBgn0187552	Scf_X	-0.303047	0.0447761	f
FBgn0187553	Scf_X	-0.167668	0.017568	f
FBgn0187557	Scf_X	0.279042	1.17481e-06	m
FBgn0187559	Scf_X	-0.197614	0.0128269	f
FBgn0187561	Scf_X	-1.14992	7.70638e-10	f
FBgn0187566	Scf_X	-0.3248	0.024719	f
FBgn0187568	Scf_X	-0.578178	0.000367185	f
FBgn0187572	Scf_X	0.142296	0.0191034	m
FBgn0187573	Scf_X	-0.207733	0.0233108	f
FBgn0187602	Scf_X	-0.293806	0.0145602	f
FBgn0187607	Scf_X	-0.211311	0.0112074	f
FBgn0187608	Scf_X	0.422402	0.000300178	m
FBgn0187611	Scf_X	0.283507	1.19013e-08	m
FBgn0187615	Scf_X	-0.36427	0.000238423	f
FBgn0187618	Scf_X	0.210703	0.00112889	m
FBgn0187619	Scf_X	-0.850353	7.31336e-18	f
FBgn0187629	Scf_X	0.465119	3.09152e-06	m
FBgn0187630	Scf_X	0.251523	0.014163	m
FBgn0187632	Scf_X	1.52567	1.18931e-09	m
FBgn0187638	Scf_X	0.241946	4.53583e-06	m
FBgn0187641	Scf_X	-0.33426	0.00401097	f
FBgn0187644	Scf_X	0.30223	0.00232945	m
FBgn0187654	Scf_X	0.232736	2.22963e-11	m
FBgn0187655	Scf_X	0.176071	0.00661144	m
FBgn0187665	Scf_X	1.18145	5.51377e-06	m
FBgn0187672	Scf_X	3.4515	1.68536e-05	m
FBgn0187675	Scf_X	-0.199429	0.000286609	f
FBgn0187680	Scf_X	-0.122514	0.028703	f
FBgn0187681	Scf_X	-0.167724	0.00706141	f
FBgn0187686	Scf_NODE_12414	-2.78843	3.0832e-46	f
FBgn0187693	Scf_X	0.329136	1.94982e-11	m
FBgn0187697	Scf_X	-0.335303	0.000951338	f
FBgn0187709	Scf_X	0.38021	3.09152e-06	m
FBgn0187715	Scf_X	0.192963	0.012201	m
FBgn0187718	Scf_X	0.224545	0.0391452	m
FBgn0187719	Scf_X	0.281954	0.00069001	m
FBgn0187721	Scf_X	0.154363	0.0346474	m
FBgn0187724	Scf_X	0.619659	1.11601e-12	m
FBgn0187731	Scf_X	0.166185	0.000879988	m
FBgn0187733	Scf_X	0.936022	5.03849e-18	m
FBgn0187734	Scf_X	0.193523	0.0232128	m
FBgn0187735	Scf_X	-0.243957	0.000808341	f
FBgn0187754	Scf_X	-0.18785	0.0120569	f
FBgn0187755	Scf_X	0.265517	9.63552e-08	m
FBgn0187756	Scf_X	-0.39131	0.000165611	f
FBgn0187757	Scf_X	-0.752745	2.62561e-06	f
FBgn0187759	Scf_X	-0.248653	0.0447761	f
FBgn0187762	Scf_X	0.223976	0.0474971	m
FBgn0187770	Scf_X	-1.57201	1.21743e-13	f
FBgn0187775	Scf_X	-0.981461	0.00548628	f
FBgn0187776	Scf_X	-0.167662	0.0352793	f
FBgn0187788	Scf_X	-0.89027	0.0124838	f
FBgn0187792	Scf_X	0.561315	1.90196e-05	m
FBgn0187795	Scf_X	-0.330351	3.10836e-06	f
FBgn0187797	Scf_X	-0.28105	9.1501e-08	f
FBgn0187799	Scf_X	-0.235294	2.60439e-05	f
FBgn0187814	Scf_X	-0.334065	4.82569e-06	f
FBgn0187815	Scf_X	0.190591	0.0223834	m
FBgn0187816	Scf_X	-0.234495	0.000640222	f
FBgn0187826	Scf_X	-0.345585	0.00337208	f
FBgn0187829	Scf_X	0.262681	0.00318025	m
FBgn0187846	Scf_X	0.256693	4.99036e-09	m
FBgn0187849	Scf_X	-0.149636	0.0212873	f
FBgn0187850	Scf_X	-3.272	2.79485e-25	f
FBgn0187851	Scf_X	-0.18222	0.0323486	f
FBgn0187852	Scf_X	0.216316	1.3224e-06	m
FBgn0187862	Scf_X	-0.162785	0.000879988	f
FBgn0187880	Scf_X	-0.156267	0.0350276	f
FBgn0187881	Scf_X	-0.170665	0.0329953	f
FBgn0187884	Scf_X	-0.163122	0.0256564	f
FBgn0187897	Scf_X	0.18548	0.00311987	m
FBgn0187907	Scf_X	-0.235586	0.000174858	f
FBgn0187914	Scf_X	0.644754	7.56543e-10	m
FBgn0187919	Scf_X	0.202367	0.0114167	m
FBgn0187940	Scf_X	0.346961	7.82457e-15	m
FBgn0187943	Scf_X	0.217283	0.0473874	m
FBgn0187951	Scf_X	0.255193	3.39559e-06	m
FBgn0187964	Scf_X	1.58522	0.0403575	m
FBgn0187965	Scf_X	-0.210967	0.0125029	f
FBgn0187971	Scf_3R	0.244984	0.017604	m
FBgn0187975	Scf_X	-0.406031	4.30178e-23	f
FBgn0187976	Scf_X	0.20422	0.01203	m
FBgn0187978	Scf_X	0.290273	4.13497e-05	m
FBgn0187995	Scf_X	0.179397	0.0137729	m
FBgn0187997	Scf_X	-0.389794	2.38097e-20	f
FBgn0188002	Scf_X	0.32844	0.00170074	m
FBgn0188006	Scf_X	0.562809	1.23642e-05	m
FBgn0188021	Scf_X	-0.25791	0.0391043	f
FBgn0188027	Scf_X	0.264647	0.0177797	m
FBgn0188033	Scf_X	-0.40686	1.02953e-06	f
FBgn0188035	Scf_X	-0.375238	0.0323367	f
FBgn0188037	Scf_X	1.05872	2.07269e-08	m
FBgn0188042	Scf_X	4.94195	5.85967e-79	m
FBgn0188060	Scf_X	1.0021	0.0203321	m
FBgn0188064	Scf_X	0.307833	7.4082e-06	m
FBgn0188072	Scf_X	-0.464614	0.0062197	f
FBgn0188075	Scf_X	-0.728877	0.000395638	f
FBgn0188079	Scf_X	1.17471	0.00931299	m
FBgn0188081	Scf_X	-0.220657	0.00211338	f
FBgn0188088	Scf_X	0.782852	3.82295e-31	m
FBgn0188091	Scf_X	0.17041	0.00660228	m
FBgn0188097	Scf_X	-1.85812	4.3351e-23	f
FBgn0188098	Scf_X	-0.470702	8.14721e-06	f
FBgn0188099	Scf_X	-0.325967	9.22528e-09	f
FBgn0188100	Scf_X	-1.70433	6.93558e-38	f
FBgn0188101	Scf_X	-1.01528	3.94768e-11	f
FBgn0188102	Scf_X	0.351605	0.0424847	m
FBgn0188105	Scf_X	0.295354	0.000702586	m
FBgn0188107	Scf_X	-0.728987	1.53982e-22	f
FBgn0188108	Scf_X	-1.21313	4.21448e-25	f
FBgn0188109	Scf_X	-1.25167	0.00249926	f
FBgn0188115	Scf_X	-0.109822	0.0199562	f
FBgn0188116	Scf_X	-0.541324	3.7823e-05	f
FBgn0188120	Scf_X	-0.723742	0.00893294	f
FBgn0188122	Scf_X	0.207667	0.00487116	m
FBgn0188125	Scf_X	0.376888	5.92877e-08	m
FBgn0188129	Scf_3R	0.184237	0.0391452	m
FBgn0188130	Scf_X	0.18097	0.0493675	m
FBgn0188146	Scf_X	0.259993	0.0209403	m
FBgn0188149	Scf_X	0.622933	1.25125e-05	m
FBgn0188156	Scf_X	0.696597	1.78402e-10	m
FBgn0188157	Scf_X	6.27424	3.69817e-14	m
FBgn0188159	Scf_X	0.109688	0.00199217	m
FBgn0188177	Scf_X	0.547688	6.13019e-11	m
FBgn0188180	Scf_X	0.453859	5.63729e-07	m
FBgn0188181	Scf_X	0.26422	2.77403e-05	m
FBgn0188187	Scf_X	0.267282	0.00282906	m
FBgn0188188	Scf_X	0.619757	2.87442e-22	m
FBgn0188190	Scf_X	0.469881	1.55862e-12	m
FBgn0188196	Scf_X	0.325356	1.14082e-08	m
FBgn0188206	Scf_X	0.231922	0.0275432	m
FBgn0188222	Scf_X	0.729755	3.04936e-06	m
FBgn0188224	Scf_X	-0.392003	1.28694e-09	f
FBgn0188231	Scf_X	-0.291847	0.000820542	f
FBgn0188233	Scf_X	-0.588387	0.00661472	f
FBgn0188245	Scf_3R	0.223507	0.00992446	m
FBgn0188246	Scf_X	-0.334903	0.000901333	f
FBgn0188249	Scf_X	0.757797	0.000601712	m
FBgn0188251	Scf_X	1.23244	0.0406876	m
FBgn0188256	Scf_X	-0.186927	0.01203	f
FBgn0188260	Scf_X	-0.221005	0.0018913	f
FBgn0188262	Scf_X	-0.314195	9.76402e-09	f
FBgn0188273	Scf_NODE_111243	0.8964	0.0486052	m
FBgn0188280	Scf_X	-0.325648	6.88665e-06	f
FBgn0188282	Scf_X	0.23422	0.0164596	m
FBgn0188284	Scf_X	0.524234	8.71774e-09	m
FBgn0188288	Scf_X	2.369	1.15072e-05	m
FBgn0188291	Scf_X	-0.0890592	0.0452612	f
FBgn0188303	Scf_X	-0.142884	0.0333231	f
FBgn0188320	Scf_X	-0.523651	4.77753e-05	f
FBgn0188324	Scf_X	-0.314391	9.4317e-06	f
FBgn0188325	Scf_X	-0.203898	4.53583e-06	f
FBgn0188327	Scf_X	0.239365	0.0147927	m
FBgn0188330	Scf_X	-0.596176	0.00318025	f
FBgn0188335	Scf_X	0.238869	0.0199405	m
FBgn0188339	Scf_X	-0.12642	0.0369779	f
FBgn0188342	Scf_X	0.240338	0.000238423	m
FBgn0188352	Scf_X	0.314636	4.84967e-07	m
FBgn0188353	Scf_X	-2.45322	4.3896e-14	f
FBgn0188354	Scf_X	-0.241343	0.00956394	f
FBgn0188356	Scf_X	-0.293771	2.17705e-06	f
FBgn0188357	Scf_X	-0.387318	0.00679272	f
FBgn0188362	Scf_X	0.230833	0.0157791	m
FBgn0188373	Scf_X	0.374213	5.62055e-08	m
FBgn0188379	Scf_X	0.271669	0.00269858	m
FBgn0188380	Scf_X	0.45715	0.0274782	m
FBgn0188389	Scf_X	-0.409483	0.00193078	f
FBgn0188393	Scf_X	-0.129971	0.0322525	f
FBgn0188395	Scf_X	2.42584	0.000601712	m
FBgn0188397	Scf_X	-0.289017	6.6422e-05	f
FBgn0188398	Scf_X	0.88323	1.44847e-09	m
FBgn0188403	Scf_X	0.719725	1.27174e-14	m
FBgn0188404	Scf_X	1.02839	2.69188e-05	m
FBgn0188406	Scf_X	0.23827	0.00218542	m
FBgn0188411	Scf_X	-1.85442	9.90436e-29	f
FBgn0188412	Scf_X	0.527399	0.02296	m
FBgn0188413	Scf_X	0.190933	0.00820289	m
FBgn0188417	Scf_X	0.315016	0.0164596	m
FBgn0188420	Scf_X	-0.329839	1.00891e-08	f
FBgn0188421	Scf_X	-0.442546	8.3786e-08	f
FBgn0188422	Scf_3R	2.16308	5.13128e-10	m
FBgn0188425	Scf_X	1.24934	1.90178e-31	m
FBgn0188426	Scf_X	1.7655	3.45463e-06	m
FBgn0188430	Scf_X	0.300494	0.00173091	m
FBgn0188431	Scf_3R	1.32624	0.00354606	m
FBgn0188436	Scf_X	-0.575349	7.12661e-07	f
FBgn0188437	Scf_X	0.335292	0.000464682	m
FBgn0188439	Scf_X	-0.288389	1.11804e-05	f
FBgn0188449	Scf_X	0.684156	1.02697e-23	m
FBgn0188450	Scf_X	-0.340849	0.000582659	f
FBgn0188466	Scf_X	0.414253	0.000711403	m
FBgn0188467	Scf_X	0.254487	0.00640454	m
FBgn0188471	Scf_X	0.151882	0.0394952	m
FBgn0188472	Scf_X	-0.450996	0.0176494	f
FBgn0188480	Scf_X	-0.206817	0.0178313	f
FBgn0188491	Scf_X	-0.185133	0.0129674	f
FBgn0188492	Scf_X	-0.71954	6.00165e-09	f
FBgn0188496	Scf_X	-0.25636	0.0148594	f
FBgn0188507	Scf_X	0.208351	0.0190164	m
FBgn0188512	Scf_X	-0.398798	4.92976e-22	f
FBgn0188517	Scf_X	0.240635	0.0468587	m
FBgn0188529	Scf_X	0.487999	8.3786e-08	m
FBgn0188538	Scf_X	-0.257296	0.0149593	f
FBgn0188539	Scf_X	-0.511837	2.28926e-65	f
FBgn0188542	Scf_X	-0.486429	5.62055e-08	f
FBgn0188546	Scf_X	-1.19312	5.13128e-10	f
FBgn0188548	Scf_X	-7.00193	5.08018e-301	f
FBgn0188552	Scf_X	-0.211176	1.10533e-06	f
FBgn0188554	Scf_X	0.80994	3.38485e-36	m
FBgn0188555	Scf_X	0.568248	9.32284e-12	m
FBgn0188557	Scf_X	0.73268	5.44206e-11	m
FBgn0188566	Scf_X	-0.425911	0.00334583	f
FBgn0188576	Scf_X	0.44072	0.00130115	m
FBgn0188577	Scf_X	2.00298	8.53723e-06	m
FBgn0188580	Scf_X	0.245938	0.000601712	m
FBgn0188587	Scf_X	-0.115585	0.016972	f
FBgn0188592	Scf_X	-0.310173	7.01172e-08	f
FBgn0188594	Scf_X	-0.328303	0.00893294	f
FBgn0188606	Scf_X	1.30374	3.12037e-17	m
FBgn0188608	Scf_X	0.446529	1.26787e-10	m
FBgn0188610	Scf_X	0.123685	0.031234	m
FBgn0188613	Scf_X	-0.30721	2.46403e-07	f
FBgn0188615	Scf_X	-0.210416	5.55753e-06	f
FBgn0188616	Scf_X	0.227187	0.000501182	m
FBgn0188623	Scf_X	-0.218802	0.00222777	f
FBgn0188626	Scf_X	0.796748	0.0247501	m
FBgn0188656	Scf_X	-0.241562	0.00055999	f
FBgn0188661	Scf_X	-0.234948	0.00191832	f
FBgn0188663	Scf_X	-1.19496	0.0422968	f
FBgn0188673	Scf_X	-1.03852	0.00448524	f
FBgn0188680	Scf_X	0.16003	0.00142669	m
FBgn0188691	Scf_X	0.270209	0.0287006	m
FBgn0188696	Scf_X	-0.815039	0.0207719	f
FBgn0188707	Scf_X	2.9098	3.46868e-13	m
FBgn0188709	Scf_X	0.705562	3.16575e-09	m
FBgn0188710	Scf_X	0.30855	0.00055999	m
FBgn0188718	Scf_X	-0.339802	3.14666e-07	f
FBgn0188726	Scf_3R	-0.143637	0.0447019	f
FBgn0188731	Scf_X	0.368253	4.19397e-08	m
FBgn0188732	Scf_X	0.303548	0.00614822	m
FBgn0188738	Scf_X	-1.30783	0.00935932	f
FBgn0188743	Scf_X	0.402839	0.00128268	m
FBgn0188752	Scf_X	0.161975	0.0247102	m
FBgn0188753	Scf_X	0.25201	0.00721057	m
FBgn0188754	Scf_X	-0.648819	0.000188356	f
FBgn0188762	Scf_X	-0.340306	0.000192606	f
FBgn0188768	Scf_X	-0.242553	0.00103155	f
FBgn0188775	Scf_3R	-0.254309	0.00933581	f
FBgn0188776	Scf_X	-0.171656	6.94508e-05	f
FBgn0188783	Scf_X	0.810324	0.000358678	m
FBgn0188798	Scf_X	0.285496	0.00426853	m
FBgn0188799	Scf_X	0.262901	5.0737e-05	m
FBgn0188802	Scf_X	0.324253	3.72373e-05	m
FBgn0188809	Scf_X	0.191632	0.0295008	m
FBgn0188810	Scf_X	-0.321869	3.52263e-07	f
FBgn0188820	Scf_X	-0.360514	0.0053619	f
FBgn0188821	Scf_X	-1.11516	0.0102609	f
FBgn0188823	Scf_X	-0.181284	0.00661144	f
FBgn0188835	Scf_X	-0.137155	0.0147927	f
FBgn0188836	Scf_X	2.05305	2.38457e-07	m
FBgn0188838	Scf_X	1.08036	1.14931e-11	m
FBgn0188840	Scf_X	-0.319958	0.000128209	f
FBgn0188841	Scf_3R	0.185385	0.00399164	m
FBgn0188843	Scf_X	0.264735	0.000187586	m
FBgn0188845	Scf_X	0.800853	1.23371e-08	m
FBgn0188852	Scf_X	0.928548	2.39481e-59	m
FBgn0188854	Scf_X	0.832647	0.0408238	m
FBgn0188856	Scf_X	0.897187	1.62706e-09	m
FBgn0188857	Scf_X	-1.68489	2.00423e-06	f
FBgn0188862	Scf_X	-1.78101	2.59712e-06	f
FBgn0188877	Scf_X	1.12162	5.5975e-24	m
FBgn0188887	Scf_X	-0.220959	0.000804911	f
FBgn0188902	Scf_X	0.224033	0.00361174	m
FBgn0188905	Scf_X	-1.40113	1.93761e-44	f
FBgn0188908	Scf_X	0.3156	0.00308154	m
FBgn0188911	Scf_X	2.43232	1.18492e-10	m
FBgn0188913	Scf_X	-0.195854	4.1315e-05	f
FBgn0188915	Scf_X	1.2515	9.88935e-22	m
FBgn0188918	Scf_X	-0.366936	1.18931e-09	f
FBgn0188919	Scf_X	-0.588059	1.14086e-08	f
FBgn0188935	Scf_X	-0.459665	5.97093e-08	f
FBgn0188937	Scf_X	0.749073	1.57386e-13	m
FBgn0188950	Scf_X	0.226255	0.010522	m
FBgn0188980	Scf_X	-0.256379	2.48616e-06	f
FBgn0188985	Scf_X	0.121722	0.00906167	m
FBgn0188991	Scf_X	0.670467	0.000265824	m
FBgn0189001	Scf_X	0.338527	1.78855e-13	m
FBgn0189004	Scf_X	0.227116	0.0377082	m
FBgn0189008	Scf_X	-0.219871	0.0072689	f
FBgn0189010	Scf_X	0.294069	5.08721e-06	m
FBgn0189014	Scf_X	0.450218	9.4475e-20	m
FBgn0189028	Scf_2R	-0.321754	0.00042572	f
FBgn0189034	Scf_X	-0.103155	0.0445062	f
FBgn0189044	Scf_X	0.435863	0.00539232	m
FBgn0189047	Scf_X	-0.440346	0.00164151	f
FBgn0189057	Scf_X	0.749724	8.54376e-40	m
FBgn0189060	Scf_X	-0.43859	6.21613e-07	f
FBgn0189064	Scf_X	-0.614591	6.7853e-21	f
FBgn0189069	Scf_3R	-0.174718	0.0264563	f
FBgn0189077	Scf_X	0.175564	0.0129674	m
FBgn0189078	Scf_X	0.197679	0.0297916	m
FBgn0189087	Scf_X	0.513707	6.85565e-05	m
FBgn0189091	Scf_X	-0.239143	9.97807e-08	f
FBgn0189106	Scf_X	-0.367148	0.000659795	f
FBgn0189108	Scf_3L	0.165462	2.18917e-09	m
FBgn0189134	Scf_3L	-0.19981	0.000419394	f
FBgn0189139	Scf_3L	-0.2621	0.00976488	f
FBgn0189171	Scf_3L	0.122252	0.02742	m
FBgn0189182	Scf_3L	-0.263926	0.0196971	f
FBgn0189195	Scf_3L	-0.307245	0.0316151	f
FBgn0189222	Scf_3R	0.304537	0.000317276	m
FBgn0189227	Scf_3R	0.192426	0.0390933	m
FBgn0189239	Scf_3R	0.365694	0.02838	m
FBgn0189244	Scf_2R	-0.276801	0.00660377	f
FBgn0189366	Scf_2L	-0.128138	0.0245479	f
FBgn0189393	Scf_4	-0.268195	0.0275432	f
FBgn0189400	Scf_3R	-0.222397	1.06268e-05	f
FBgn0189452	Scf_3R	0.207758	0.0154415	m
FBgn0189485	Scf_3R	-0.251682	0.0254319	f
FBgn0189521	Scf_X	-0.359896	2.64431e-14	f
FBgn0189575	Scf_3R	0.240846	0.0269325	m
FBgn0189629	Scf_3R	0.214452	0.0349941	m
FBgn0189652	Scf_3R	0.21904	6.31835e-05	m
FBgn0189659	Scf_3R	-0.108136	0.00848963	f
FBgn0189715	Scf_3R	0.232529	0.0394952	m
FBgn0189722	Scf_3R	0.217302	0.000143964	m
FBgn0189729	Scf_3R	0.182588	1.50901e-05	m
FBgn0189746	Scf_3R	-0.361866	0.000188356	f
FBgn0189751	Scf_3R	0.226986	0.0386187	m
FBgn0189757	Scf_3R	0.157933	0.00679272	m
FBgn0189767	Scf_3R	-0.251145	0.00443715	f
FBgn0189772	Scf_3R	0.213964	3.60282e-05	m
FBgn0189777	Scf_3R	-0.139056	0.0170539	f
FBgn0189779	Scf_3R	-0.153689	0.0260378	f
FBgn0189818	Scf_3R	-0.361421	0.0154877	f
FBgn0189821	Scf_3R	-0.116951	0.00213072	f
FBgn0189849	Scf_3R	-0.489566	0.00800011	f
FBgn0189858	Scf_3R	0.0959889	0.01382	m
FBgn0189891	Scf_3R	0.224496	0.000474674	m
FBgn0189912	Scf_3R	-0.220128	0.00514923	f
FBgn0189927	Scf_3R	-0.496573	1.14847e-05	f
FBgn0189929	Scf_3R	0.342179	0.00650283	m
FBgn0189937	Scf_3R	-0.495456	0.0138364	f
FBgn0189938	Scf_3R	1.07919	0.0389276	m
FBgn0189955	Scf_3R	-0.375909	0.000125567	f
FBgn0190005	Scf_3R	0.176724	0.0228953	m
FBgn0190007	Scf_3R	0.183095	0.000131227	m
FBgn0190009	Scf_3R	0.156097	0.0194147	m
FBgn0190016	Scf_3R	-4.37347	3.15198e-16	f
FBgn0190020	Scf_3R	-0.212257	0.0107349	f
FBgn0190061	Scf_3R	0.102439	0.0496863	m
FBgn0190083	Scf_3R	0.178045	0.00216829	m
FBgn0190084	Scf_3R	0.229567	0.0182219	m
FBgn0190103	Scf_3R	0.178196	0.00421873	m
FBgn0190128	Scf_3R	-0.28256	0.00120549	f
FBgn0190135	Scf_3R	-4.68342	0.00555594	f
FBgn0190139	Scf_3R	-3.85658	6.23674e-10	f
FBgn0190156	Scf_3R	-0.24919	0.00164151	f
FBgn0190166	Scf_3R	-0.272647	0.000606814	f
FBgn0190229	Scf_3R	-0.239292	8.59907e-13	f
FBgn0190264	Scf_3R	0.15167	0.025273	m
FBgn0190266	Scf_3R	0.220937	0.00101331	m
FBgn0190310	Scf_3R	0.10572	0.0247432	m
FBgn0190348	Scf_3R	0.471146	0.0270043	m
FBgn0190351	Scf_3R	0.174321	0.00709101	m
FBgn0190356	Scf_3R	-0.375828	0.000321573	f
FBgn0190365	Scf_3R	-1.17331	0.00447794	f
FBgn0190371	Scf_3R	0.442622	2.81395e-06	m
FBgn0190385	Scf_3R	-0.136255	0.0203432	f
FBgn0190391	Scf_3R	0.0982071	0.0464523	m
FBgn0190413	Scf_3R	0.182957	0.0219944	m
FBgn0190427	Scf_3R	-0.205824	0.00364821	f
FBgn0190430	Scf_3R	0.145954	0.0164543	m
FBgn0190434	Scf_3R	0.221417	0.00205389	m
FBgn0190440	Scf_3R	-1.66169	0.00119823	f
FBgn0190450	Scf_3R	0.319389	3.62056e-07	m
FBgn0190473	Scf_3R	1.35442	2.844e-09	m
FBgn0190476	Scf_3R	-0.146666	0.00249926	f
FBgn0190492	Scf_3R	0.248335	0.0022252	m
FBgn0190503	Scf_3R	0.165807	0.0471595	m
FBgn0190510	Scf_3R	0.310224	0.000387733	m
FBgn0190520	Scf_3R	0.260847	0.00992446	m
FBgn0190527	Scf_3R	0.224252	0.00655095	m
FBgn0190533	Scf_X	0.234775	0.00847536	m
FBgn0190535	Scf_3R	0.596221	0.0391168	m
FBgn0190545	Scf_3R	0.256919	0.0126132	m
FBgn0190580	Scf_3R	2.94909	1.30157e-10	m
FBgn0190611	Scf_3R	-0.255126	0.0350276	f
FBgn0190685	Scf_3R	-0.212429	0.00933581	f
FBgn0190689	Scf_3R	-0.378624	1.18931e-09	f
FBgn0190691	Scf_3R	-0.277561	0.0351265	f
FBgn0190700	Scf_3R	0.178813	0.00864119	m
FBgn0190736	Scf_3R	0.203402	0.0159262	m
FBgn0190751	Scf_3R	0.139859	0.022452	m
FBgn0190770	Scf_3R	0.24037	0.0299892	m
FBgn0190789	Scf_3R	2.45377	0.0486052	m
FBgn0190795	Scf_3R	-0.335865	0.000416425	f
FBgn0190812	Scf_3R	-0.263247	0.0402096	f
FBgn0190813	Scf_3R	0.605432	0.0343624	m
FBgn0190834	Scf_3R	0.151356	0.0468587	m
FBgn0190852	Scf_X	-0.606664	4.91555e-09	f
FBgn0190947	Scf_3R	0.670314	8.65016e-08	m
FBgn0190952	Scf_3R	0.106462	0.00304985	m
FBgn0190965	Scf_3R	-0.734816	1.87929e-10	f
FBgn0190985	Scf_3R	-0.291294	0.0372873	f
FBgn0191030	Scf_3R	0.184919	0.0490552	m
FBgn0191071	Scf_X	0.272141	0.00139306	m
FBgn0191078	Scf_3R	0.251955	0.0390587	m
FBgn0191079	Scf_3R	0.25326	0.0175995	m
FBgn0191107	Scf_3R	0.22894	0.00178663	m
FBgn0191120	Scf_X	0.421197	0.00355262	m
FBgn0191125	Scf_3R	0.266621	0.00397511	m
FBgn0191152	Scf_3R	-0.181579	0.0254283	f
FBgn0191171	Scf_3R	-0.142209	0.00345651	f
FBgn0191179	Scf_X	0.535917	3.44428e-14	m
FBgn0191208	Scf_3R	-2.92031	0.000102463	f
FBgn0191241	Scf_3R	-0.27454	0.0104423	f
FBgn0191286	Scf_3R	0.100277	0.0489018	m
FBgn0191306	Scf_3R	0.122594	0.00153095	m
FBgn0191316	Scf_3R	-0.207837	0.0388312	f
FBgn0191351	Scf_3R	2.31173	1.3805e-06	m
FBgn0191366	Scf_3R	-0.609536	0.000541566	f
FBgn0191387	Scf_3R	1.79321	4.70432e-07	m
FBgn0191392	Scf_3R	0.165827	0.041648	m
FBgn0191396	Scf_3R	0.131916	0.0471595	m
FBgn0191398	Scf_3R	0.245273	2.10896e-06	m
FBgn0191423	Scf_3R	0.147056	0.0203097	m
FBgn0191429	Scf_3R	-0.399154	0.0197305	f
FBgn0191445	Scf_3R	-0.135158	0.00154403	f
FBgn0191454	Scf_3R	-0.444042	0.0240072	f
FBgn0191473	Scf_3R	-0.229985	0.0351767	f
FBgn0191477	Scf_3R	-0.380749	0.00884808	f
FBgn0191507	Scf_3R	-0.418054	4.98592e-14	f
FBgn0191513	Scf_3R	-0.227247	0.000508754	f
FBgn0191525	Scf_3R	0.822548	0.0344232	m
FBgn0191533	Scf_3R	-0.109045	0.00742113	f
FBgn0191540	Scf_3R	-0.146339	0.0286913	f
FBgn0191543	Scf_3R	0.323726	0.0129674	m
FBgn0191568	Scf_3R	0.495464	0.0165097	m
FBgn0191611	Scf_3R	0.291935	0.0195975	m
FBgn0191617	Scf_3R	0.199611	0.00735528	m
FBgn0191621	Scf_3R	-0.30089	0.00222643	f
FBgn0191658	Scf_3R	0.250553	0.00217066	m
FBgn0191681	Scf_3R	0.296949	1.98632e-05	m
FBgn0191689	Scf_3R	-0.270172	0.00997953	f
FBgn0191750	Scf_3R	0.271341	0.0103616	m
FBgn0191755	Scf_3R	0.275952	0.00361174	m
FBgn0191769	Scf_3R	-0.738387	0.046504	f
FBgn0191777	Scf_3R	0.185841	0.00735528	m
FBgn0191795	Scf_3R	0.101728	0.0114474	m
FBgn0191799	Scf_3R	0.192881	0.0301709	m
FBgn0191828	Scf_3R	0.120027	0.00800011	m
FBgn0191835	Scf_3R	0.173163	0.0268657	m
FBgn0191846	Scf_3R	0.165889	0.0230344	m
FBgn0191868	Scf_3R	0.190771	0.00905799	m
FBgn0191873	Scf_3R	0.605593	0.0223613	m
FBgn0191880	Scf_3R	-0.222801	0.00350569	f
FBgn0191885	Scf_3R	-0.627344	0.00270565	f
FBgn0191899	Scf_3R	-0.138101	0.00679272	f
FBgn0191948	Scf_3R	0.3422	0.000257243	m
FBgn0191997	Scf_3R	0.700059	0.0422968	m
FBgn0192009	Scf_3R	0.214409	0.000607061	m
FBgn0192023	Scf_3R	-0.768149	0.0399074	f
FBgn0192037	Scf_3R	0.240177	0.000579828	m
FBgn0192057	Scf_3R	0.538205	0.000730918	m
FBgn0192078	Scf_3R	0.119961	0.0468491	m
FBgn0192080	Scf_3R	0.190216	0.0430183	m
FBgn0192103	Scf_3R	-0.476387	2.1618e-06	f
FBgn0192121	Scf_3R	-0.614704	4.6051e-06	f
FBgn0192154	Scf_X	-0.237415	0.00130115	f
FBgn0192157	Scf_3R	-0.265447	0.009237	f
FBgn0192175	Scf_3R	-0.332445	1.87653e-09	f
FBgn0192177	Scf_3R	-1.04854	0.0277252	f
FBgn0192182	Scf_3R	0.510364	2.4022e-09	m
FBgn0192187	Scf_3R	0.152968	0.00237013	m
FBgn0192194	Scf_3R	-0.472864	0.00820567	f
FBgn0192207	Scf_3R	0.311973	3.31981e-06	m
FBgn0192254	Scf_3R	0.209443	0.00182088	m
FBgn0192261	Scf_3R	-0.241097	0.000550044	f
FBgn0192265	Scf_3R	0.283266	0.0226067	m
FBgn0192266	Scf_3R	0.149476	0.0219617	m
FBgn0192305	Scf_3R	0.316032	0.000114679	m
FBgn0192322	Scf_3R	0.486731	0.000746353	m
FBgn0192335	Scf_3R	0.269027	0.000126509	m
FBgn0192344	Scf_3R	-0.323187	6.31835e-05	f
FBgn0192349	Scf_3R	-0.22196	0.0116783	f
FBgn0192374	Scf_3R	0.201059	0.00270565	m
FBgn0192376	Scf_3R	-0.436727	0.00238359	f
FBgn0192395	Scf_3R	0.153671	0.0490897	m
FBgn0192396	Scf_3R	0.177634	0.00692739	m
FBgn0192416	Scf_3R	-0.304049	0.000951338	f
FBgn0192435	Scf_3R	-0.242389	0.00307636	f
FBgn0192479	Scf_3R	-1.08378	0.042551	f
FBgn0192488	Scf_3R	-0.174178	0.00248229	f
FBgn0192502	Scf_3R	-0.264945	0.0141164	f
FBgn0192503	Scf_3R	-0.154552	0.0391168	f
FBgn0192507	Scf_3R	-0.14143	0.0295671	f
FBgn0192520	Scf_3R	-1.48535	2.12714e-07	f
FBgn0192523	Scf_3R	-0.78977	0.0403424	f
FBgn0192539	Scf_3R	-0.188335	0.0240072	f
FBgn0192542	Scf_3R	-0.200212	0.0484562	f
FBgn0192546	Scf_3R	-0.266326	6.56184e-05	f
FBgn0192557	Scf_3R	0.113129	0.00523793	m
FBgn0192563	Scf_3R	-0.148709	0.00543771	f
FBgn0192574	Scf_3R	-0.38248	0.00793018	f
FBgn0192579	Scf_3R	0.296727	0.00278036	m
FBgn0192587	Scf_3R	-0.369091	3.01029e-09	f
FBgn0192598	Scf_3R	-0.24658	0.000994357	f
FBgn0192599	Scf_3R	-0.389218	0.00582235	f
FBgn0192601	Scf_3R	0.131144	0.0100885	m
FBgn0192637	Scf_3R	0.964462	0.00273814	m
FBgn0192678	Scf_3R	-0.241544	1.87479e-06	f
FBgn0192751	Scf_3R	0.232854	0.00116681	m
FBgn0192752	Scf_3R	-0.180987	0.0474628	f
FBgn0192780	Scf_3R	-0.189289	0.033657	f
FBgn0192792	Scf_3R	0.143323	0.0388312	m
FBgn0192798	Scf_3R	0.399414	0.0398876	m
FBgn0192849	Scf_3R	0.205323	0.00992446	m
FBgn0192855	Scf_3R	-0.366861	0.00112889	f
FBgn0192857	Scf_3R	-0.236758	3.13117e-05	f
FBgn0192862	Scf_3R	-0.142191	0.0466041	f
FBgn0192878	Scf_3R	0.139349	0.0218258	m
FBgn0192881	Scf_3R	-5.20399	1.47985e-41	f
FBgn0192940	Scf_3R	-0.256703	0.00205206	f
FBgn0193021	Scf_3R	-0.364772	0.00676651	f
FBgn0193033	Scf_3R	-0.535627	0.033657	f
FBgn0193038	Scf_2L	-0.181254	0.0106157	f
FBgn0193041	Scf_2L	-0.15105	0.0445062	f
FBgn0193071	Scf_2L	0.23392	7.24105e-05	m
FBgn0193072	Scf_2L	0.0987478	0.0496672	m
FBgn0193130	Scf_2L	0.13734	0.0341874	m
FBgn0193139	Scf_2L	-0.240199	0.00178663	f
FBgn0193156	Scf_2L	-0.32402	2.0713e-06	f
FBgn0193167	Scf_2L	-0.197803	1.49733e-06	f
FBgn0193198	Scf_2L	0.294352	1.12097e-05	m
FBgn0193204	Scf_2L	0.204702	0.00138481	m
FBgn0193213	Scf_2L	0.109947	0.0254976	m
FBgn0193214	Scf_2L	0.193516	0.000615513	m
FBgn0193226	Scf_2L	-0.179115	0.0307649	f
FBgn0193232	Scf_2L	-0.239834	0.00285486	f
FBgn0193235	Scf_2L	-0.15543	0.00313678	f
FBgn0193252	Scf_2L	0.175889	8.75772e-06	m
FBgn0193280	Scf_2L	0.233003	0.00184197	m
FBgn0193285	Scf_2L	-0.227661	0.00589251	f
FBgn0193320	Scf_2L	0.170251	2.16231e-06	m
FBgn0193336	Scf_2L	0.26749	0.000570123	m
FBgn0193358	Scf_2L	0.406825	2.8774e-07	m
FBgn0193359	Scf_2L	-0.433662	0.00335439	f
FBgn0193399	Scf_2L	-0.954029	4.49708e-18	f
FBgn0193435	Scf_2L	-0.276255	0.0430446	f
FBgn0193468	Scf_2L	-0.302263	0.000643072	f
FBgn0193470	Scf_2L	0.139707	0.0396593	m
FBgn0193480	Scf_2L	0.261356	0.0035915	m
FBgn0193498	Scf_2L	0.183577	0.000381032	m
FBgn0193509	Scf_2L	-0.145401	0.000416275	f
FBgn0193539	Scf_2L	0.113964	0.0477282	m
FBgn0193552	Scf_2L	0.143022	0.0446306	m
FBgn0193577	Scf_2L	-0.191909	4.36664e-05	f
FBgn0193607	Scf_2L	-0.133462	0.0417871	f
FBgn0193616	Scf_2L	0.317941	0.00120549	m
FBgn0193627	Scf_2L	0.209608	0.00188026	m
FBgn0193628	Scf_2L	3.15232	0.0204491	m
FBgn0193631	Scf_2L	-0.170959	0.00780493	f
FBgn0193640	Scf_X	0.571034	0.00016568	m
FBgn0193666	Scf_2L	0.238348	0.00330154	m
FBgn0193675	Scf_2L	0.110725	0.0190164	m
FBgn0193679	Scf_2L	-0.273283	0.00298916	f
FBgn0193695	Scf_2L	-0.352812	0.000259583	f
FBgn0193696	Scf_2L	0.167837	0.0126907	m
FBgn0193698	Scf_2L	-0.239228	0.00113223	f
FBgn0193700	Scf_2L	-0.268129	0.0114167	f
FBgn0193701	Scf_2L	-0.147302	0.0389276	f
FBgn0193708	Scf_2L	-0.407183	0.0323118	f
FBgn0193733	Scf_4	-0.254793	0.0136494	f
FBgn0193740	Scf_2L	-0.389524	0.00285486	f
FBgn0193747	Scf_2L	1.37951	0.01627	m
FBgn0193748	Scf_2L	-0.265878	0.0471775	f
FBgn0193761	Scf_2L	0.130146	0.00108801	m
FBgn0193775	Scf_2L	-0.672803	0.010866	f
FBgn0193800	Scf_2L	0.336357	0.0057422	m
FBgn0193803	Scf_2L	0.129673	0.0387358	m
FBgn0193829	Scf_2L	-0.236693	0.000272571	f
FBgn0193837	Scf_2L	-0.216752	0.0199562	f
FBgn0193855	Scf_2L	-1.65771	1.7907e-10	f
FBgn0193863	Scf_2L	-0.42308	2.44529e-16	f
FBgn0193881	Scf_2L	0.319491	0.0466465	m
FBgn0193905	Scf_2L	-0.161761	0.0203432	f
FBgn0193908	Scf_2L	0.179368	0.00270737	m
FBgn0193950	Scf_2L	-0.721499	0.0325814	f
FBgn0193951	Scf_2L	0.978602	0.000664351	m
FBgn0193976	Scf_2L	0.166049	0.0164596	m
FBgn0193978	Scf_2L	0.119592	0.00144869	m
FBgn0194003	Scf_2L	0.153263	0.00214939	m
FBgn0194005	Scf_2L	0.131576	0.041648	m
FBgn0194009	Scf_2L	-0.147556	0.0362759	f
FBgn0194019	Scf_2L	0.949924	0.00030799	m
FBgn0194052	Scf_2L	-0.251635	0.00271505	f
FBgn0194055	Scf_2L	0.164406	0.0262973	m
FBgn0194059	Scf_2L	0.209413	0.0343996	m
FBgn0194070	Scf_2L	-0.388289	0.000396938	f
FBgn0194071	Scf_2L	0.300247	5.488e-05	m
FBgn0194077	Scf_2L	0.244674	0.00277084	m
FBgn0194104	Scf_2L	0.205614	0.0175169	m
FBgn0194127	Scf_2L	-0.884023	0.00992446	f
FBgn0194128	Scf_2L	-1.10999	0.00969782	f
FBgn0194145	Scf_2L	0.185614	0.00122481	m
FBgn0194158	Scf_2L	-0.294456	0.0343364	f
FBgn0194169	Scf_2L	0.313992	0.0105321	m
FBgn0194177	Scf_2L	0.138865	0.0486147	m
FBgn0194202	Scf_2L	-0.240471	0.00305912	f
FBgn0194204	Scf_2L	0.215375	0.00715106	m
FBgn0194205	Scf_2L	-0.708311	0.0466465	f
FBgn0194214	Scf_2L	0.224468	0.00251807	m
FBgn0194219	Scf_2L	1.60036	5.76074e-05	m
FBgn0194233	Scf_2L	0.34289	0.0465042	m
FBgn0194269	Scf_2L	-0.834436	0.0347175	f
FBgn0194277	Scf_2L	-0.179994	0.00757878	f
FBgn0194295	Scf_2L	0.250783	0.0124212	m
FBgn0194332	Scf_2L	-0.142346	0.00742113	f
FBgn0194337	Scf_2L	0.117408	0.028301	m
FBgn0194348	Scf_2L	-0.460006	9.50034e-07	f
FBgn0194382	Scf_2L	-0.394779	0.00533465	f
FBgn0194385	Scf_2L	0.553865	2.39618e-08	m
FBgn0194386	Scf_2L	-0.708587	8.52497e-07	f
FBgn0194387	Scf_2L	-0.647028	5.49669e-08	f
FBgn0194389	Scf_2L	-0.248891	0.0414057	f
FBgn0194396	Scf_2L	0.203712	0.0433517	m
FBgn0194403	Scf_2L	-0.881274	2.29803e-06	f
FBgn0194459	Scf_2L	-0.256259	0.00282109	f
FBgn0194501	Scf_2L	0.251238	0.00249998	m
FBgn0194502	Scf_2L	-0.168466	0.0020142	f
FBgn0194517	Scf_2L	0.135084	0.000367185	m
FBgn0194524	Scf_2L	0.235634	0.000396938	m
FBgn0194528	Scf_2L	0.175179	0.00597119	m
FBgn0194545	Scf_2L	0.193779	0.00627461	m
FBgn0194548	Scf_2L	-0.153549	0.0391881	f
FBgn0194566	Scf_2L	-0.196046	0.0109602	f
FBgn0194571	Scf_2L	0.253603	0.0093065	m
FBgn0194623	Scf_2L	0.267771	0.0238973	m
FBgn0194630	Scf_2L	0.552245	0.00147341	m
FBgn0194634	Scf_2L	-0.185785	0.0388481	f
FBgn0194645	Scf_2L	-0.326108	0.0159163	f
FBgn0194691	Scf_2L	-0.22824	0.0473567	f
FBgn0194700	Scf_2L	0.183778	0.00628321	m
FBgn0194715	Scf_2L	0.534526	0.024466	m
FBgn0194750	Scf_2L	-0.370788	0.0343364	f
FBgn0194768	Scf_2L	0.27811	0.000729289	m
FBgn0194772	Scf_2L	-0.22948	0.00793018	f
FBgn0194780	Scf_2L	-0.226208	0.0212859	f
FBgn0194800	Scf_2L	-1.03208	0.00285486	f
FBgn0194807	Scf_2L	0.141436	0.00884808	m
FBgn0194810	Scf_2L	0.262754	0.00150644	m
FBgn0194837	Scf_2L	-0.184062	0.00077977	f
FBgn0194848	Scf_2L	-0.519741	7.68199e-05	f
FBgn0194857	Scf_2L	4.61191	3.6671e-07	m
FBgn0194932	Scf_2L	-0.317709	0.000627101	f
FBgn0194934	Scf_2L	-0.342699	0.044402	f
FBgn0194968	Scf_2L	0.157817	0.0479306	m
FBgn0194974	Scf_2L	0.117509	1.82845e-05	m
FBgn0194996	Scf_2L	0.123019	1.24678e-05	m
FBgn0195007	Scf_2L	-0.123704	0.0180595	f
FBgn0195009	Scf_2L	0.183028	0.00893294	m
FBgn0195019	Scf_2L	0.20685	0.000309791	m
FBgn0195084	Scf_2L	0.23036	0.040698	m
FBgn0195091	Scf_2L	2.99676	0.0139862	m
FBgn0195134	Scf_2L	-0.155321	0.00055999	f
FBgn0195148	Scf_2L	0.235455	0.0270043	m
FBgn0195171	Scf_2L	1.08727	5.57903e-07	m
FBgn0195176	Scf_2L	0.14841	0.0477282	m
FBgn0195181	Scf_2L	0.1244	0.0138482	m
FBgn0195185	Scf_2L	0.225454	0.00919313	m
FBgn0195188	Scf_2L	0.206493	9.71202e-06	m
FBgn0195201	Scf_2L	-0.318421	0.000904719	f
FBgn0195232	Scf_2L	0.156065	0.0170816	m
FBgn0195249	Scf_2L	1.35468	4.28029e-05	m
FBgn0195296	Scf_2L	0.189671	0.0403533	m
FBgn0195304	Scf_2L	-1.10586	0.000732118	f
FBgn0195370	Scf_2L	0.107126	0.043784	m
FBgn0195414	Scf_2L	-0.353233	0.00126173	f
FBgn0195430	Scf_2L	0.16457	0.0383261	m
FBgn0195463	Scf_2L	-0.249993	0.012117	f
FBgn0195500	Scf_2L	0.143306	0.00820567	m
FBgn0195517	Scf_2L	-0.130345	0.0474328	f
FBgn0195528	Scf_2L	0.175813	0.00966955	m
FBgn0195555	Scf_2L	0.244627	0.015733	m
FBgn0195646	Scf_2L	-0.377641	1.53778e-09	f
FBgn0195647	Scf_2L	0.135508	0.00994714	m
FBgn0195652	Scf_2L	-0.182098	0.0151387	f
FBgn0195654	Scf_2L	0.197648	0.000106938	m
FBgn0195660	Scf_2L	0.129949	0.0454213	m
FBgn0195663	Scf_2L	-0.112721	0.00470267	f
FBgn0195671	Scf_2R	-0.17392	0.0109445	f
FBgn0195704	Scf_4	-0.271116	0.00471164	f
FBgn0195705	Scf_4	-0.290898	0.00299303	f
FBgn0195706	Scf_4	-0.255041	0.0102855	f
FBgn0195711	Scf_4	-0.299857	0.00116681	f
FBgn0195712	Scf_4	-0.188276	0.0398318	f
FBgn0195718	Scf_X	-1.37642	0.00124998	f
FBgn0195728	Scf_4	-0.336173	0.024719	f
FBgn0195729	Scf_4	-0.197158	0.0303897	f
FBgn0195730	Scf_4	-0.277596	0.00181504	f
FBgn0195731	Scf_4	-0.18994	0.041489	f
FBgn0195732	Scf_4	0.45536	7.24105e-05	m
FBgn0195738	Scf_4	-0.26743	0.0186945	f
FBgn0195742	Scf_ICT25	-0.205851	0.0307649	f
FBgn0195746	Scf_4	-0.124273	0.0352098	f
FBgn0195759	Scf_4	-0.304108	0.00340644	f
FBgn0195760	Scf_4	-0.390616	0.000192685	f
FBgn0195764	Scf_X	-0.412435	8.95737e-07	f
FBgn0195767	Scf_X	-0.482561	0.000115819	f
FBgn0195786	Scf_X	-0.164753	0.0387042	f
FBgn0195789	Scf_X	0.190136	0.00231619	m
FBgn0195805	Scf_NODE_39788	-0.808385	0.00855741	f
FBgn0195806	Scf_NODE_39788	0.278074	1.57386e-13	m
FBgn0195809	Scf_X	-3.12453	2.5809e-33	f
FBgn0195821	Scf_X	0.183874	0.000838964	m
FBgn0195830	Scf_X	0.730726	2.2488e-13	m
FBgn0195833	Scf_X	-0.216877	0.00364383	f
FBgn0195847	Scf_X	-0.179571	0.0477282	f
FBgn0195850	Scf_X	1.9686	0.00103065	m
FBgn0195855	Scf_X	3.26449	2.1481e-41	m
FBgn0195863	Scf_X	0.238454	0.0473567	m
FBgn0195865	Scf_X	-0.159463	0.0260378	f
FBgn0195872	Scf_X	1.71945	0.000437081	m
FBgn0195875	Scf_X	-0.268222	9.46802e-06	f
FBgn0195885	Scf_X	-0.328836	0.00848963	f
FBgn0195896	Scf_X	0.382278	0.0293394	m
FBgn0195902	Scf_X	-0.54265	1.27982e-11	f
FBgn0195910	Scf_X	-0.255671	0.00040879	f
FBgn0195913	Scf_X	-0.176408	0.0408238	f
FBgn0195914	Scf_X	-0.22057	5.05254e-07	f
FBgn0195928	Scf_X	-0.260827	1.23259e-06	f
FBgn0195933	Scf_X	0.105346	0.0261417	m
FBgn0195935	Scf_X	-0.5612	1.49324e-05	f
FBgn0195940	Scf_X	0.672492	4.06454e-15	m
FBgn0195943	Scf_X	0.721598	1.47219e-62	m
FBgn0195944	Scf_X	2.97877	6.08867e-24	m
FBgn0195948	Scf_X	0.145532	0.0249815	m
FBgn0195950	Scf_X	0.189364	0.00803147	m
FBgn0195953	Scf_X	2.37694	1.01355e-75	m
FBgn0195954	Scf_X	0.183444	0.00980193	m
FBgn0195962	Scf_X	0.626578	0.0390428	m
FBgn0195964	Scf_X	0.473072	0.000341398	m
FBgn0195970	Scf_X	-0.278351	0.00108321	f
FBgn0195971	Scf_X	0.241106	1.99171e-05	m
FBgn0195974	Scf_X	-0.271754	0.000351617	f
FBgn0195976	Scf_X	-0.339225	0.000996171	f
FBgn0195979	Scf_X	-7.27656	1.98558e-15	f
FBgn0195981	Scf_X	-1.05195	1.56264e-49	f
FBgn0195982	Scf_X	-0.436391	2.10896e-06	f
FBgn0195987	Scf_X	-0.303541	4.07194e-06	f
FBgn0195992	Scf_X	-0.342774	0.00244293	f
FBgn0195993	Scf_X	-1.22735	0.0332356	f
FBgn0195997	Scf_X	-0.430617	2.86792e-32	f
FBgn0196000	Scf_X	0.717654	6.91626e-07	m
FBgn0196002	Scf_X	-0.226139	0.00843487	f
FBgn0196005	Scf_X	0.274198	0.0100885	m
FBgn0196008	Scf_X	0.86668	1.36544e-10	m
FBgn0196009	Scf_X	-0.171587	0.034227	f
FBgn0196012	Scf_X	1.03317	1.67961e-05	m
FBgn0196015	Scf_X	-0.477575	1.83494e-05	f
FBgn0196016	Scf_X	1.68391	8.14721e-06	m
FBgn0196022	Scf_X	-0.324553	0.00474149	f
FBgn0196035	Scf_X	0.120491	0.0134695	m
FBgn0196037	Scf_X	-0.213906	0.0172757	f
FBgn0196039	Scf_X	-0.21893	0.00863629	f
FBgn0196055	Scf_X	0.784539	1.15072e-11	m
FBgn0196062	Scf_X	-0.372937	0.000583598	f
FBgn0196069	Scf_X	-0.355905	2.36552e-05	f
FBgn0196073	Scf_X	1.41677	2.52862e-13	m
FBgn0196078	Scf_X	-0.274518	9.95537e-15	f
FBgn0196081	Scf_X	-0.212958	0.00304985	f
FBgn0196092	Scf_X	0.699601	1.62298e-07	m
FBgn0196093	Scf_X	0.217779	0.0300236	m
FBgn0196096	Scf_X	0.307031	2.69776e-08	m
FBgn0196100	Scf_X	0.152034	0.0179013	m
FBgn0196101	Scf_X	0.252256	0.0286877	m
FBgn0196116	Scf_X	-0.587159	2.37082e-07	f
FBgn0196117	Scf_X	-0.242959	0.00182088	f
FBgn0196118	Scf_X	-0.175486	0.000104323	f
FBgn0196142	Scf_X	-0.283175	0.0181166	f
FBgn0196143	Scf_X	-0.160165	0.0203276	f
FBgn0196144	Scf_X	-0.126386	0.0232297	f
FBgn0196145	Scf_X	0.641085	5.19995e-10	m
FBgn0196152	Scf_X	0.503968	2.44094e-05	m
FBgn0196160	Scf_X	-0.314054	1.57874e-32	f
FBgn0196167	Scf_X	-0.569254	2.25978e-09	f
FBgn0196171	Scf_X	0.413225	7.15811e-06	m
FBgn0196172	Scf_X	-2.35422	1.96683e-13	f
FBgn0196173	Scf_NODE_39788	0.247854	0.0403424	m
FBgn0196188	Scf_X	0.219454	0.00541633	m
FBgn0196203	Scf_X	0.163932	0.000121167	m
FBgn0196225	Scf_2R	-0.450464	1.60242e-05	f
FBgn0196286	Scf_2R	-0.17747	0.0356104	f
FBgn0196287	Scf_2R	0.243654	0.0107745	m
FBgn0196295	Scf_2R	-0.288068	0.0141615	f
FBgn0196315	Scf_2R	0.176096	0.0216112	m
FBgn0196319	Scf_2R	-0.216268	0.000203014	f
FBgn0196325	Scf_2R	0.238105	2.95301e-05	m
FBgn0196334	Scf_2R	0.140469	0.043784	m
FBgn0196353	Scf_2R	-2.99884	5.62421e-05	f
FBgn0196365	Scf_2R	0.241108	0.0493625	m
FBgn0196404	Scf_2R	-0.120287	0.0395712	f
FBgn0196435	Scf_2R	-0.142755	0.000662976	f
FBgn0196442	Scf_2R	-0.251247	0.00497166	f
FBgn0196443	Scf_2R	-0.127809	0.00686405	f
FBgn0196486	Scf_2R	-0.364397	0.00137386	f
FBgn0196530	Scf_2R	-0.206514	0.0175995	f
FBgn0196536	Scf_2R	-0.650402	8.8497e-49	f
FBgn0196551	Scf_2R	0.151767	0.00869714	m
FBgn0196557	Scf_2R	0.419081	0.0449811	m
FBgn0196561	Scf_2R	-0.179696	0.0422811	f
FBgn0196617	Scf_2R	0.199018	0.0203182	m
FBgn0196623	Scf_2R	0.145637	0.000901333	m
FBgn0196653	Scf_2R	-0.223542	0.000541017	f
FBgn0196668	Scf_2R	-3.10602	0.0120162	f
FBgn0196673	Scf_X	-0.181001	0.0369423	f
FBgn0196689	Scf_2R	-0.124782	0.0139862	f
FBgn0196707	Scf_2R	-0.145332	0.0458954	f
FBgn0196720	Scf_2R	-1.31295	0.00637339	f
FBgn0196747	Scf_2R	-0.16645	0.0274782	f
FBgn0196748	Scf_2R	0.212062	0.00360439	m
FBgn0196754	Scf_2R	-0.429555	0.0100885	f
FBgn0196755	Scf_2R	0.231974	0.00988146	m
FBgn0196757	Scf_2R	0.359311	0.00232332	m
FBgn0196787	Scf_2R	0.140981	0.0350276	m
FBgn0196798	Scf_2R	0.216438	0.00562647	m
FBgn0196806	Scf_2R	0.324026	0.0029212	m
FBgn0196811	Scf_2R	-0.230322	0.00280421	f
FBgn0196838	Scf_2R	0.152809	0.00251807	m
FBgn0196853	Scf_2R	0.160468	0.00421873	m
FBgn0196930	Scf_2R	1.33055	9.24841e-06	m
FBgn0196932	Scf_2R	0.203597	0.0182219	m
FBgn0196958	Scf_2R	-0.145762	0.017568	f
FBgn0196977	Scf_2R	0.147262	0.0453114	m
FBgn0196979	Scf_2R	0.201996	0.000141968	m
FBgn0197012	Scf_2R	-0.365597	0.00487116	f
FBgn0197093	Scf_2R	0.310274	0.000651648	m
FBgn0197095	Scf_2R	0.148981	0.0228622	m
FBgn0197097	Scf_2R	0.156832	0.0471595	m
FBgn0197103	Scf_2R	-0.22364	0.0203432	f
FBgn0197106	Scf_2R	-8.98446	3.55012e-08	f
FBgn0197150	Scf_2R	-0.673013	0.0245267	f
FBgn0197151	Scf_2R	0.169223	0.0225337	m
FBgn0197171	Scf_2R	-0.195845	0.0193755	f
FBgn0197172	Scf_2R	0.135348	0.0345702	m
FBgn0197181	Scf_2R	0.319335	7.5178e-11	m
FBgn0197228	Scf_2R	0.363363	1.15334e-06	m
FBgn0197256	Scf_2R	-0.151474	0.00280421	f
FBgn0197260	Scf_2R	-0.564856	0.00742113	f
FBgn0197288	Scf_2R	-0.340554	0.0185174	f
FBgn0250777	Scf_X	-0.167002	0.00976488	f
FBgn0256524	Scf_X	-0.576734	1.13433e-08	f
FBgn0262162	Scf_X	-0.21091	4.0734e-06	f
FBgn0264925	Scf_X	-0.128545	0.0376203	f
FBgn0266091	Scf_X	-0.325118	0.00574647	f
FBgn0268070	Scf_NODE_24415	-0.12324	6.85034e-05	f
FBgn0268080	Scf_X	0.478566	2.15682e-18	m
FBgn0268101	Scf_2L	-0.196596	0.0207556	f
FBgn0268143	Scf_3L	-0.190568	0.0249547	f
FBgn0268144	Scf_X	0.337522	7.85863e-09	m
FBgn0268146	Scf_2R	0.185928	0.0331718	m
FBgn0268151	Scf_X	8.37785	1.60266e-18	m
FBgn0268154	Scf_X	3.2011	1.15985e-93	m
FBgn0268179	Scf_X	0.211601	0.00884808	m
FBgn0268185	Scf_X	0.235978	0.0226121	m
FBgn0268199	Scf_X	-1.77655	2.58548e-40	f
FBgn0268206	Scf_X	0.816408	7.02062e-05	m
FBgn0268221	Scf_X	0.269945	6.21613e-07	m
FBgn0268222	Scf_3L	-0.440979	0.00089023	f
FBgn0268259	Scf_X	-0.825367	0.0113448	f
FBgn0268268	Scf_X	0.164873	0.0221974	m
FBgn0268320	Scf_2R	-0.301677	0.0108323	f
FBgn0268339	Scf_NODE_115073	-0.52683	0.000292166	f
FBgn0268353	Scf_X	2.77253	4.9613e-29	m
FBgn0268387	Scf_X	0.379301	0.00401097	m
FBgn0268396	Scf_X	0.202467	1.06268e-05	m
FBgn0268400	Scf_X	-0.70813	0.000144725	f
FBgn0268408	Scf_NODE_12770	-0.65797	0.0168158	f
FBgn0268424	Scf_2L	-0.267104	0.00529423	f
FBgn0268431	Scf_X	-0.31329	0.0334823	f
FBgn0268440	Scf_2L	-0.289638	0.00651346	f
FBgn0268443	Scf_X	0.237074	0.000782024	m
FBgn0268468	Scf_X	-0.158434	0.00234791	f
FBgn0268472	Scf_X	1.68744	2.62877e-25	m
FBgn0268525	Scf_X	0.43152	7.40034e-09	m
FBgn0268563	Scf_3L	-0.223721	0.0390533	f
FBgn0268564	Scf_X	0.348638	3.13117e-05	m
FBgn0268580	Scf_X	1.40837	0.000160776	m
FBgn0268600	Scf_2L	-0.181288	0.00694143	f
FBgn0268614	Scf_X	-0.399777	0.0363946	f
FBgn0268622	Scf_3L	0.215644	0.00824422	m
FBgn0268680	Scf_4	-0.286399	0.0165069	f
FBgn0268686	Scf_3L	-0.39267	0.00984837	f
FBgn0268708	Scf_X	-0.177397	0.0482247	f
FBgn0268741	Scf_3R	-0.30001	0.0373946	f
FBgn0268745	Scf_3R	-0.42907	0.0169069	f
FBgn0268764	Scf_3R	-0.239525	0.0173352	f
FBgn0268773	Scf_X	0.278503	0.000121167	m
FBgn0268798	Scf_2R	0.218766	0.02296	m
FBgn0268813	Scf_3R	-10.0146	0.000170345	f
FBgn0268817	Scf_X	-2.97381	4.61084e-45	f
FBgn0268819	Scf_X	-0.222087	0.00493092	f
FBgn0268823	Scf_3R	-0.205504	0.0319711	f
FBgn0268829	Scf_X	-0.133451	0.0490552	f
FBgn0268844	Scf_X	-0.179471	0.0254976	f
FBgn0268851	Scf_X	-1.03349	0.000504127	f
FBgn0268862	Scf_X	-0.52526	0.00820567	f
FBgn0268873	Scf_X	0.201262	0.00104072	m
FBgn0268896	Scf_X	2.864	6.26696e-10	m
FBgn0268901	Scf_X	-0.14483	0.0192933	f
FBgn0268904	Scf_2R	-0.271201	0.00128347	f
FBgn0268916	Scf_X	0.443645	0.0465871	m
FBgn0268919	Scf_3L	-0.228475	0.0331524	f
FBgn0268932	Scf_3L	-0.296972	0.0035915	f
FBgn0268936	Scf_X	0.240566	2.27389e-05	m
FBgn0268947	Scf_2L	-0.360264	0.00931872	f
FBgn0268949	Scf_2L	0.745991	0.00709101	m
FBgn0268953	Scf_3R	-0.286886	0.000468369	f
FBgn0268966	Scf_3L	0.162916	0.0394952	m
FBgn0268998	Scf_4	-0.244435	0.0155733	f
FBgn0269015	Scf_2L	-0.24748	0.00321224	f
FBgn0269030	Scf_2R	-1.18908	1.94103e-09	f
FBgn0269056	Scf_3L	-0.267032	0.0203276	f
FBgn0269063	Scf_2R	-0.28661	0.018162	f
FBgn0269068	Scf_X	0.407351	0.00635601	m
FBgn0269074	Scf_2L	0.356721	0.00212441	m
FBgn0269082	Scf_X	1.00011	7.89494e-37	m
FBgn0269109	Scf_X	1.54788	0.02776	m
FBgn0269137	Scf_X	0.248498	0.00103921	m
FBgn0269157	Scf_X	-0.165689	0.00320695	f
FBgn0269212	Scf_2R	-0.14047	0.0348521	f
FBgn0269260	Scf_3L	0.334582	0.010148	m
FBgn0269274	Scf_X	-0.349104	2.5918e-10	f
FBgn0269292	Scf_2L	-1.41099	0.0248192	f
FBgn0269293	Scf_3R	0.158091	0.0307036	m
FBgn0269297	Scf_X	0.208776	5.07356e-09	m
FBgn0269335	Scf_X	6.71919	3.83213e-12	m
FBgn0269364	Scf_X	0.322187	2.46282e-08	m
FBgn0269365	Scf_3R	-0.220947	0.00661845	f
FBgn0269369	Scf_2R	-0.310256	8.11595e-06	f
FBgn0269379	Scf_X	-0.203181	0.00107238	f
FBgn0269389	Scf_3R	0.196042	0.00803644	m
FBgn0269394	Scf_2R	-0.376564	0.000155074	f
FBgn0269418	Scf_2R	-0.17019	0.034276	f
FBgn0269420	Scf_X	0.35648	0.0187803	m
FBgn0269422	Scf_X	-0.181721	0.000260343	f
FBgn0269427	Scf_X	0.329068	0.000106857	m
FBgn0269459	Scf_3R	-0.151558	0.00598107	f
FBgn0269466	Scf_2L	-0.321086	0.00247315	f
FBgn0269473	Scf_X	0.242437	0.0323367	m
FBgn0269484	Scf_2L	-0.237682	0.0362759	f
FBgn0269497	Scf_X	-0.296633	0.0368625	f
FBgn0269514	Scf_X	-3.28256	9.74336e-05	f
FBgn0269520	Scf_X	-0.511254	5.74135e-10	f
FBgn0269529	Scf_2R	-0.383711	0.000225944	f
FBgn0269567	Scf_X	-1.16637	1.00845e-05	f
FBgn0269570	Scf_X	1.01726	7.66602e-05	m
FBgn0269581	Scf_X	-0.169782	0.00992446	f
FBgn0269598	Scf_NODE_39788	0.178633	0.00216829	m
FBgn0269601	Scf_X	-0.616691	2.92851e-33	f
FBgn0269606	Scf_X	-0.56918	0.0241067	f
FBgn0269612	Scf_4	-0.279191	0.0382919	f
FBgn0269618	Scf_2R	-0.460677	0.03339	f
FBgn0269634	Scf_2L	0.275273	0.00216829	m
FBgn0269656	Scf_3L	1.41306	0.00253466	m
FBgn0269657	Scf_3R	-0.262916	0.0250204	f
FBgn0269710	Scf_X	0.402296	6.49618e-05	m
FBgn0269715	Scf_2R	0.345217	0.000137423	m
FBgn0269719	Scf_3L	0.539143	0.0461081	m
FBgn0269723	Scf_X	0.912887	0.0318258	m
FBgn0269728	Scf_2L	0.212092	0.0118245	m
FBgn0269740	Scf_X	-0.291211	3.35688e-07	f
FBgn0269755	Scf_X	0.287602	0.000946196	m
FBgn0269765	Scf_X	0.429332	0.0372873	m
FBgn0269770	Scf_X	0.230094	7.14777e-07	m
FBgn0269773	Scf_X	0.198842	0.000801921	m
FBgn0269775	Scf_X	-0.15313	0.00923905	f
FBgn0269778	Scf_X	0.25599	0.0120363	m
FBgn0269785	Scf_X	0.463744	0.0439918	m
FBgn0269794	Scf_X	0.326259	0.000168185	m
FBgn0269799	Scf_2L	0.196297	0.00640454	m
FBgn0269814	Scf_X	-0.756047	1.00094e-07	f
FBgn0269829	Scf_X	0.0963556	0.0193057	m
FBgn0269884	Scf_3L	0.214992	0.00905416	m
FBgn0269893	Scf_2R	-1.25726	0.0439918	f
FBgn0269926	Scf_3L	-0.195582	0.0477282	f
FBgn0269939	Scf_X	-6.44634	0	f
FBgn0269968	Scf_3L	-0.401377	5.4868e-05	f
FBgn0269973	Scf_3L	-0.309025	0.022015	f
FBgn0269974	Scf_3R	-1.21382	0.0272643	f
FBgn0269997	Scf_2L	0.172168	0.0451461	m
FBgn0270004	Scf_X	0.328423	1.48162e-06	m
FBgn0270025	Scf_X	-0.346472	0.000140933	f
FBgn0270038	Scf_2L	2.22237	0.00100882	m
FBgn0270058	Scf_X	0.294787	0.000141968	m
FBgn0270085	Scf_2L	-0.153866	0.0311202	f
FBgn0270105	Scf_2R	-0.275708	0.00775162	f
FBgn0270109	Scf_2L	0.491733	0.000367185	m
FBgn0270117	Scf_X	-0.24681	0.00188038	f
FBgn0270124	Scf_2R	-0.346294	0.00111484	f
FBgn0270132	Scf_NODE_6885	-0.30253	0.0422398	f
FBgn0270134	Scf_NODE_115087	-0.366348	0.00284991	f
FBgn0270146	Scf_X	0.294784	5.61144e-06	m
FBgn0270159	Scf_NODE_24415	0.324007	3.50144e-05	m
FBgn0270178	Scf_X	-0.132646	0.0157791	f
FBgn0270189	Scf_2L	-0.355881	0.0337621	f
FBgn0270191	Scf_3R	-0.314481	0.0147578	f
FBgn0270208	Scf_2L	0.459451	0.0341676	m
FBgn0270209	Scf_X	-0.315685	0.0169069	f
FBgn0270242	Scf_X	-3.03356	0.000361976	f
FBgn0270246	Scf_2R	-2.26833	0.00182199	f
FBgn0270256	Scf_X	-0.471205	0.000546599	f
FBgn0270257	Scf_4	-0.411117	0.00513548	f
FBgn0270280	Scf_4	0.245481	5.05254e-07	m
FBgn0270312	Scf_X	-0.179812	0.00990637	f
FBgn0270316	Scf_2R	0.333618	0.00440444	m
FBgn0270322	Scf_2L	0.27067	0.000711403	m
FBgn0270330	Scf_NODE_26091	-0.103035	0.0403424	f
FBgn0270332	Scf_2R	0.274922	0.000467887	m
FBgn0270345	Scf_X	-0.484622	0.000370032	f
FBgn0270348	Scf_2L	-0.256485	0.00433136	f
FBgn0270349	Scf_2L	-0.197549	0.0219893	f
FBgn0270359	Scf_2L	-2.7359	5.1384e-10	f
FBgn0270382	Scf_3R	0.205315	0.00164204	m
FBgn0270385	Scf_2R	-0.181371	2.8196e-05	f
FBgn0270410	Scf_X	0.131662	0.0482475	m
FBgn0270431	Scf_3L	0.624111	0.0307036	m
FBgn0270433	Scf_X	0.642894	1.31186e-09	m
FBgn0270441	Scf_X	5.25997	1.04057e-13	m
FBgn0270443	Scf_4	-0.252278	0.0113737	f
FBgn0270445	Scf_X	-0.654342	5.78533e-06	f
FBgn0270460	Scf_3R	-0.555196	0.0403424	f
FBgn0270469	Scf_X	0.393618	6.65779e-08	m
FBgn0270478	Scf_3L	-0.257491	0.0185056	f
FBgn0270485	Scf_4	0.129988	0.00923905	m
FBgn0270487	Scf_3R	-0.276642	0.0101406	f
FBgn0270494	Scf_X	0.450766	0.000295731	m
FBgn0270528	Scf_2L	-0.439546	0.00113993	f
FBgn0270531	Scf_X	-0.336399	0.0112074	f
FBgn0270533	Scf_X	-0.355106	2.59717e-07	f
FBgn0270556	Scf_3R	-0.36596	0.0471595	f
FBgn0270580	Scf_X	-0.165811	0.010817	f
FBgn0270592	Scf_NODE_25117	-0.260683	0.0403424	f
FBgn0270600	Scf_X	1.66243	7.58675e-20	m
FBgn0270604	Scf_4	-0.318981	0.0389276	f
FBgn0270611	Scf_X	-0.397141	0.00380324	f
FBgn0270614	Scf_3L	-0.349035	0.0195854	f
FBgn0270647	Scf_3L	-0.426237	0.00555594	f
FBgn0270655	Scf_X	-0.316124	1.059e-09	f
FBgn0270658	Scf_2R	-0.394716	1.05279e-08	f
FBgn0270662	Scf_2R	-0.226781	0.0484562	f
FBgn0270665	Scf_X	-0.601706	9.09679e-05	f
FBgn0270677	Scf_X	8.47759	6.61358e-46	m
FBgn0270681	Scf_X	-0.196214	0.0225096	f
FBgn0270693	Scf_X	-0.199457	0.0029509	f
FBgn0270710	Scf_2L	-0.251426	0.0318026	f
FBgn0270744	Scf_X	-0.220459	0.00513548	f
FBgn0270749	Scf_X	1.98261	0.00020144	m
FBgn0270760	Scf_X	0.210278	0.0498315	m
FBgn0270784	Scf_2R	-0.293025	0.014534	f
FBgn0270798	Scf_2R	-0.894294	7.21498e-07	f
FBgn0270800	Scf_X	0.160732	0.0147733	m
FBgn0270811	Scf_X	0.661711	0.00307307	m
FBgn0270812	Scf_4	-0.765896	2.38816e-11	f
FBgn0270819	Scf_X	-0.76704	0.000189535	f
FBgn0270834	Scf_3L	0.102497	8.62807e-05	m
FBgn0270840	Scf_2R	0.207521	0.0177797	m
FBgn0270847	Scf_X	-0.573753	0.0383919	f
FBgn0270854	Scf_2L	0.61493	0.0085196	m
FBgn0270857	Scf_X	0.607567	0.0367751	m
FBgn0270861	Scf_X	-0.443282	0.00492684	f
FBgn0270892	Scf_2L	0.12679	0.00357071	m
FBgn0270893	Scf_2R	-0.291284	0.0126286	f
FBgn0270895	Scf_3R	-0.265704	0.0320826	f
FBgn0270899	Scf_X	-0.292289	0.0260378	f
FBgn0270900	Scf_3L	-0.384186	1.73284e-05	f
FBgn0270922	Scf_NODE_22823	0.211937	0.0447019	m

## Sheet: Dyak
Sex-biased genes in D. yakuba
gene_id	chrom	log2fc	qval	sex
FBgn0013165	2R	-0.834037	0.00585179	f
FBgn0015691	X	0.389139	0.025707	m
FBgn0022816	X	-0.155417	0.00466191	f
FBgn0022818	X	-0.880166	0.00309096	f
FBgn0028749	X	-4.41174	6.42343e-11	f
FBgn0041638	X	0.48735	4.24843e-06	m
FBgn0042724	X	0.98633	0.00032061	m
FBgn0043389	3R	-1.33146	1.1506e-32	f
FBgn0043598	X	-0.352059	0.000249224	f
FBgn0043603	X	0.54488	2.96414e-23	m
FBgn0044136	2R	-0.759242	0.000856071	f
FBgn0046713	X	1.30045	1.34752e-20	m
FBgn0066138	X	0.185664	0.00488579	m
FBgn0067423	3R	-0.11478	0.0226562	f
FBgn0067425	3R	-0.344743	0.0190598	f
FBgn0067439	2L	-1.10206	3.0777e-05	f
FBgn0067442	X	-0.734553	0.0241253	f
FBgn0067449	X	1.40344	5.37662e-57	m
FBgn0067930	X	0.213853	0.00406799	m
FBgn0067951	3L	-0.494952	0.00280878	f
FBgn0067969	3L	0.239474	0.0493447	m
FBgn0067973	X	0.50331	1.06462e-07	m
FBgn0067987	2L	-0.217838	0.000752241	f
FBgn0068009	2L	-0.206624	0.0228504	f
FBgn0068031	X	-0.947217	0.000264986	f
FBgn0068032	2R	0.292834	0.0160511	m
FBgn0068086	3R	-0.286088	0.0317062	f
FBgn0068090	3R	0.195939	0.00742372	m
FBgn0068109	3R	-3.88398	6.82545e-18	f
FBgn0068142	X	0.469525	3.2549e-12	m
FBgn0068153	X	-0.511669	2.90508e-05	f
FBgn0068163	3R	-0.147104	0.0179224	f
FBgn0068173	X	0.638919	2.44287e-20	m
FBgn0068185	2R	-1.42218	2.65421e-05	f
FBgn0068210	2L	-0.283167	0.000292165	f
FBgn0068214	2L	-0.674579	0.0139131	f
FBgn0068231	2L	0.0919744	0.039978	m
FBgn0068253	3R	0.326763	0.00489595	m
FBgn0068259	X	0.453272	8.4183e-09	m
FBgn0068266	2L	-0.220589	0.0105913	f
FBgn0068272	3R	-0.742999	0.014654	f
FBgn0068283	2L	0.947915	0.0277791	m
FBgn0068309	X	-0.129769	0.0495671	f
FBgn0068316	X	0.279462	0.000166792	m
FBgn0068318	X	0.55724	1.39286e-08	m
FBgn0068321	X	-0.923261	5.74748e-18	f
FBgn0068345	3R	0.104614	0.0281835	m
FBgn0068378	v2_chr2L_random_001	-0.145711	0.0102397	f
FBgn0068390	3R	-1.05765	0.00215578	f
FBgn0068407	X	1.81083	3.32372e-06	m
FBgn0068408	X	-0.366879	3.12228e-08	f
FBgn0068419	3R	-0.889817	0.00149007	f
FBgn0068436	2R	-0.862644	0.0432805	f
FBgn0068438	X	-0.688841	0.0173875	f
FBgn0068452	v2_chr3L_random_058	1.34901	0.0299155	m
FBgn0068453	X	0.644215	6.68535e-05	m
FBgn0068494	3L	0.181533	3.92925e-06	m
FBgn0068537	X	0.190184	0.0197314	m
FBgn0068539	2L	0.198661	0.00251051	m
FBgn0068541	3R	0.228871	0.0325077	m
FBgn0068548	2R	0.202765	0.0129847	m
FBgn0082380	X	0.844071	4.83885e-18	m
FBgn0084316	X	0.204958	0.00209496	m
FBgn0084618	X	-0.384913	4.76508e-05	f
FBgn0084643	X	-0.751855	1.6826e-05	f
FBgn0084814	X	0.612926	5.06036e-10	m
FBgn0085838	2R	-0.569484	0.0238539	f
FBgn0228057	3R	-1.12665	0.0149407	f
FBgn0228067	3R	-0.968769	0.0443543	f
FBgn0228074	3R	-0.711237	0.0289202	f
FBgn0228108	3R	-0.940761	0.00878252	f
FBgn0228259	3R	-0.534396	0.0330164	f
FBgn0228273	3R	-0.14469	0.0337224	f
FBgn0228299	3R	2.95618	0.0116571	m
FBgn0228319	3R	-1.21933	0.021355	f
FBgn0228320	3R	-0.178137	0.000235525	f
FBgn0228345	3R	1.22708	0.0233163	m
FBgn0228370	3R	-0.977758	2.07921e-06	f
FBgn0228378	3R	0.210952	0.0122132	m
FBgn0228402	3R	-0.222758	0.00290688	f
FBgn0228441	3R	-0.247015	0.0226869	f
FBgn0228444	3R	-0.606453	0.0298762	f
FBgn0228460	3R	0.131722	0.00858187	m
FBgn0228503	2L	-0.97405	1.98429e-06	f
FBgn0228529	3R	0.204481	0.00707243	m
FBgn0228538	3R	0.0995527	0.0436218	m
FBgn0228544	2L	-0.302327	0.0383382	f
FBgn0228580	3R	-0.297424	0.00432092	f
FBgn0228611	3R	-0.172686	0.0436218	f
FBgn0228618	3R	-0.538709	0.0203137	f
FBgn0228664	3R	-0.610067	0.00448711	f
FBgn0228669	3R	-0.982596	0.0180547	f
FBgn0228680	3R	0.12444	0.00702249	m
FBgn0228709	3R	-0.1564	0.00141723	f
FBgn0228716	2L	-5.33727	0.00415091	f
FBgn0228768	2L	0.321584	0.00245394	m
FBgn0228836	v2_chrX_random_001	0.481137	9.29761e-08	m
FBgn0228843	v2_chrX_random_001	1.11532	2.37418e-12	m
FBgn0228969	2L	-0.188404	0.0364201	f
FBgn0229064	v2_chr2L_random_028	-0.490465	0.00162468	f
FBgn0229074	2L	-0.473018	1.65987e-05	f
FBgn0229191	2L	-1.22314	0.000843846	f
FBgn0229193	2R	0.307548	0.0428784	m
FBgn0229310	2R	0.31101	0.0208741	m
FBgn0229325	2R	-0.198413	0.00599118	f
FBgn0229331	2R	-0.828962	4.67122e-09	f
FBgn0229332	2R	0.142141	0.0326257	m
FBgn0229416	2R	-2.0232	0.00966693	f
FBgn0229418	2R	-0.271312	0.0352386	f
FBgn0229424	2R	0.123494	0.0394459	m
FBgn0229448	2R	-0.432457	0.0251349	f
FBgn0229449	2R	-0.905921	6.39946e-05	f
FBgn0229459	2R	-2.06697	0.0171359	f
FBgn0229480	2R	0.364684	3.08589e-05	m
FBgn0229533	2R	1.68113	0.0118858	m
FBgn0229603	2R	-0.574239	6.78044e-08	f
FBgn0229691	2L	0.222872	0.00768421	m
FBgn0229734	2R	-1.00592	0.00459685	f
FBgn0229749	2R	-0.130401	0.0359736	f
FBgn0229756	2L	0.117911	0.0200268	m
FBgn0229770	2R	0.264368	0.0330164	m
FBgn0229780	2R	0.158693	0.0107779	m
FBgn0229858	2R	-1.78702	2.61205e-08	f
FBgn0229867	2R	-1.05835	4.32793e-06	f
FBgn0230003	2R	-0.780826	0.0088464	f
FBgn0230075	2R	0.241199	3.05534e-07	m
FBgn0230078	2R	0.183918	3.67105e-05	m
FBgn0230082	2R	0.113179	0.00316017	m
FBgn0230098	2R	0.146095	0.0133426	m
FBgn0230135	2R	-0.237112	6.63934e-06	f
FBgn0230196	2R	1.06592	5.64762e-06	m
FBgn0230230	2R	0.381585	0.00310985	m
FBgn0230236	2R	0.154881	0.00702249	m
FBgn0230259	2L	0.124436	0.0247347	m
FBgn0230274	2R	-0.71912	0.024551	f
FBgn0230304	2R	0.337836	6.26777e-07	m
FBgn0230329	2R	0.153361	0.0408834	m
FBgn0230338	2R	-0.158366	0.0246235	f
FBgn0230373	2R	0.100204	0.00448711	m
FBgn0230396	2R	0.231677	0.000385197	m
FBgn0230404	2R	0.19441	0.0488267	m
FBgn0230417	2R	-1.14636	5.07907e-07	f
FBgn0230435	2R	-0.149462	0.0371623	f
FBgn0230438	2R	-0.128272	0.0436218	f
FBgn0230454	2R	0.173121	8.13165e-05	m
FBgn0230468	2R	0.0953982	0.0448585	m
FBgn0230559	2R	-0.176062	0.0344228	f
FBgn0230564	2R	-0.430114	0.0457641	f
FBgn0230604	2R	-0.404549	0.0332287	f
FBgn0230608	2R	-0.557533	4.74021e-05	f
FBgn0230617	2R	0.142797	0.00116754	m
FBgn0230673	2L	-0.26725	0.0138047	f
FBgn0230678	2L	-0.52139	7.78489e-08	f
FBgn0230704	2R	-0.297782	0.0443264	f
FBgn0230740	2R	0.142623	0.0352577	m
FBgn0230760	2R	4.40413	0.00036122	m
FBgn0230774	2R	0.749971	7.89119e-10	m
FBgn0230788	2R	-0.125366	0.0124828	f
FBgn0230804	2R	-0.181627	0.0293817	f
FBgn0230808	2R	-0.388192	0.000136775	f
FBgn0230856	2R	-0.133286	0.0456511	f
FBgn0230866	2R	0.175193	0.0129847	m
FBgn0230933	2R	-0.828025	0.0250753	f
FBgn0230974	2R	0.229253	0.0447815	m
FBgn0231106	2R	0.275869	0.0224924	m
FBgn0231110	2R	0.162429	0.0210316	m
FBgn0231146	2R	0.344617	0.00313159	m
FBgn0231189	2R	-1.78775	0.0166259	f
FBgn0231191	2R	0.319181	0.0187203	m
FBgn0231212	2R	1.24584	6.97704e-09	m
FBgn0231217	2R	0.178155	0.0332287	m
FBgn0231265	2L	-0.619941	0.00561042	f
FBgn0231277	2R	-0.265286	0.0493084	f
FBgn0231298	2R	0.188819	0.0160511	m
FBgn0231339	2R	-0.701815	4.12986e-09	f
FBgn0231351	2R	-0.535569	0.000562019	f
FBgn0231386	2R	-0.518877	0.0433912	f
FBgn0231388	2R	-0.33438	0.0107638	f
FBgn0231396	2R	-0.501906	5.95982e-11	f
FBgn0231496	2R	0.156967	0.00212674	m
FBgn0231521	2R	0.143616	0.0421082	m
FBgn0231524	2R	-0.241814	0.000137701	f
FBgn0231531	2R	-0.753726	0.0162258	f
FBgn0231544	2R	0.223362	0.00683022	m
FBgn0231598	2R	-0.336323	0.0324968	f
FBgn0231601	2R	0.153649	0.0415483	m
FBgn0231610	2R	0.317847	0.000937343	m
FBgn0231616	2R	-0.389105	0.038145	f
FBgn0231653	2R	0.23986	4.07598e-09	m
FBgn0231678	2R	0.387857	0.000413293	m
FBgn0231705	2R	0.117397	0.0243646	m
FBgn0231722	2R	0.215837	0.00299135	m
FBgn0231735	2L	0.207444	0.0408834	m
FBgn0231782	2R	0.276487	0.00462253	m
FBgn0231802	2R	0.254033	0.00111946	m
FBgn0231803	2R	0.345881	0.0281835	m
FBgn0231922	2R	-0.33529	0.0148722	f
FBgn0231930	2R	0.151563	0.0494053	m
FBgn0232001	2R	-0.385971	0.00564774	f
FBgn0232065	2R	-0.770693	0.00223639	f
FBgn0232114	4	0.155899	0.0231916	m
FBgn0232150	2L	0.177773	0.000170581	m
FBgn0232163	4	-0.659581	9.63129e-05	f
FBgn0232172	v2_chrUn_6779	0.435935	1.02568e-05	m
FBgn0232226	2L	-0.411264	0.0181972	f
FBgn0232237	2L	-1.03032	0.000239095	f
FBgn0232281	v2_chrUn_3116	6.54282	2.37418e-12	m
FBgn0232300	2L	1.22641	0.0310069	m
FBgn0232321	v2_chrUn_1807	5.74439	0.000467583	m
FBgn0232333	v2_chrUn_1678	-0.431427	0.000287462	f
FBgn0232380	v2_chrUn_763	5.66488	1.15193e-05	m
FBgn0232400	2L	-0.944399	0.00514779	f
FBgn0232431	v2_chrUn_101	0.345101	0.00776718	m
FBgn0232491	2L	-0.285008	0.037404	f
FBgn0232499	2L	-0.208599	0.0332519	f
FBgn0232586	2L	-1.28366	0.0386313	f
FBgn0232589	2L	-1.44655	0.00401036	f
FBgn0232602	v2_chrUn_1209	7.62846	4.95616e-19	m
FBgn0232630	2L	5.18525	0.00415091	m
FBgn0232658	v2_chrUn_2286	3.93408	0.0102707	m
FBgn0232661	2L	0.277064	0.0193554	m
FBgn0232709	2L	-0.297135	0.0211832	f
FBgn0232735	v2_chrUn_5157	5.20941	0.00581806	m
FBgn0232827	chrXh	-0.42131	1.48115e-07	f
FBgn0232828	chrXh	-0.143837	0.034173	f
FBgn0232838	chrXh	0.584557	2.81748e-10	m
FBgn0232843	X	-0.399144	4.1113e-06	f
FBgn0232857	X	0.207087	0.00197533	m
FBgn0232859	X	0.323928	0.00126421	m
FBgn0232871	X	-0.167275	5.62206e-06	f
FBgn0232873	X	2.1982	5.00957e-09	m
FBgn0232876	X	-0.590412	3.82673e-12	f
FBgn0232884	X	-0.19832	0.0233472	f
FBgn0232889	X	0.276423	0.00643516	m
FBgn0232890	X	3.16543	5.07795e-11	m
FBgn0232894	X	-0.268988	0.00425252	f
FBgn0232901	X	-0.285396	0.0243646	f
FBgn0232904	X	0.343496	0.000397552	m
FBgn0232906	X	-0.371787	3.68614e-07	f
FBgn0232926	X	0.236083	0.0239839	m
FBgn0232933	X	4.69731	9.83778e-11	m
FBgn0232941	X	0.223029	0.0145071	m
FBgn0232946	X	2.08995	8.17362e-09	m
FBgn0232951	X	-0.657456	0.0287722	f
FBgn0232953	X	0.172761	0.000692345	m
FBgn0232960	X	0.700253	0.0166259	m
FBgn0232966	X	-0.335927	0.0043908	f
FBgn0232970	X	1.64941	9.29292e-06	m
FBgn0232982	X	-0.318926	0.000294341	f
FBgn0232989	X	-4.62961	1.45026e-36	f
FBgn0232996	X	-6.30647	1.01921e-09	f
FBgn0233002	X	-0.331141	0.000736648	f
FBgn0233017	X	0.218214	0.0301899	m
FBgn0233020	X	-1.1718	0.0238539	f
FBgn0233022	X	1.35749	7.31736e-17	m
FBgn0233023	X	-0.246445	0.000498699	f
FBgn0233029	X	-0.42581	1.59e-07	f
FBgn0233038	X	1.8355	8.37408e-11	m
FBgn0233041	X	1.46559	0.00373431	m
FBgn0233042	X	2.90627	4.50119e-21	m
FBgn0233051	X	-0.2397	0.0308577	f
FBgn0233052	X	-1.50897	0.00366154	f
FBgn0233059	X	0.175493	0.0249059	m
FBgn0233062	X	0.701394	2.88525e-11	m
FBgn0233064	X	-0.151714	0.0296579	f
FBgn0233077	X	-1.07137	6.35496e-05	f
FBgn0233080	X	0.165753	0.005422	m
FBgn0233092	X	0.996348	5.51219e-05	m
FBgn0233096	X	-1.5171	0.0107358	f
FBgn0233097	X	0.468223	0.000844327	m
FBgn0233099	X	-0.68709	0.000681758	f
FBgn0233100	X	-0.256057	0.0254158	f
FBgn0233105	X	-0.192163	0.000783233	f
FBgn0233126	X	0.195406	0.0195562	m
FBgn0233136	X	0.259834	5.09475e-05	m
FBgn0233141	X	1.14331	3.82471e-21	m
FBgn0233150	X	-1.49106	1.47208e-20	f
FBgn0233152	X	0.308252	2.79079e-08	m
FBgn0233154	X	0.172098	0.000876972	m
FBgn0233155	X	4.31567	4.95616e-19	m
FBgn0233157	X	-0.205166	1.14439e-07	f
FBgn0233165	X	-0.337809	1.02914e-06	f
FBgn0233174	X	-0.239414	2.69292e-09	f
FBgn0233201	X	-0.15819	0.0191997	f
FBgn0233202	X	1.76617	1.38957e-08	m
FBgn0233206	X	0.231992	0.00454289	m
FBgn0233212	X	0.394984	2.94891e-05	m
FBgn0233213	X	0.416011	1.85171e-05	m
FBgn0233215	X	0.297756	0.000521533	m
FBgn0233216	X	-0.212427	0.0305357	f
FBgn0233222	X	0.158177	6.83462e-11	m
FBgn0233223	X	0.508864	3.37643e-19	m
FBgn0233232	X	0.170631	0.00326863	m
FBgn0233235	X	-0.871426	0.00439128	f
FBgn0233245	X	1.86691	7.06445e-11	m
FBgn0233260	X	2.01507	1.31644e-23	m
FBgn0233269	X	-0.579072	0.000188986	f
FBgn0233270	X	-0.247716	0.0142064	f
FBgn0233271	X	-0.420466	0.00784764	f
FBgn0233276	X	1.4068	3.05585e-26	m
FBgn0233279	X	1.71997	1.43575e-05	m
FBgn0233295	X	0.207369	0.00119451	m
FBgn0233298	X	0.172038	0.014654	m
FBgn0233308	X	-1.7605	6.85768e-08	f
FBgn0233310	X	0.390643	9.80746e-05	m
FBgn0233329	X	2.44656	0.0281835	m
FBgn0233330	X	0.347057	9.99165e-05	m
FBgn0233333	X	0.536189	3.20284e-12	m
FBgn0233338	X	0.15598	0.0460497	m
FBgn0233339	X	1.22758	4.9333e-09	m
FBgn0233347	X	-0.242292	0.0121211	f
FBgn0233358	X	0.169811	0.0461363	m
FBgn0233364	2L	0.144299	0.0107638	m
FBgn0233381	X	0.283525	1.05554e-05	m
FBgn0233382	X	0.438919	3.8614e-05	m
FBgn0233390	X	0.776554	1.00007e-06	m
FBgn0233395	X	0.335438	0.00493054	m
FBgn0233402	X	0.292932	5.92318e-05	m
FBgn0233408	X	0.176473	0.00497817	m
FBgn0233409	X	-0.268594	0.0012134	f
FBgn0233412	X	0.434041	5.871e-12	m
FBgn0233425	X	-0.357864	2.39276e-05	f
FBgn0233429	X	0.358279	7.08791e-05	m
FBgn0233431	X	0.126274	0.000528302	m
FBgn0233438	X	0.357122	8.35738e-14	m
FBgn0233439	X	0.468785	0.00291277	m
FBgn0233462	X	0.527015	0.000208528	m
FBgn0233466	X	1.53272	1.22231e-07	m
FBgn0233468	X	0.279901	5.00957e-09	m
FBgn0233474	X	-0.158224	0.00589004	f
FBgn0233482	X	6.14057	7.94923e-09	m
FBgn0233483	X	-0.241322	2.31159e-05	f
FBgn0233490	X	-0.449589	0.0167846	f
FBgn0233495	X	-0.387514	0.0359736	f
FBgn0233496	X	0.31452	0.00407106	m
FBgn0233506	X	1.71095	0.0102241	m
FBgn0233511	X	0.379455	0.019202	m
FBgn0233513	X	0.359317	0.00308648	m
FBgn0233519	2L	-0.970311	0.00248187	f
FBgn0233536	X	0.223582	0.00415091	m
FBgn0233540	X	-0.364813	0.00164132	f
FBgn0233545	X	-0.340442	0.0259015	f
FBgn0233546	X	0.287981	0.00673242	m
FBgn0233559	X	0.155365	0.0123141	m
FBgn0233561	X	-0.286496	0.0411613	f
FBgn0233563	X	0.727104	4.56392e-05	m
FBgn0233567	X	0.214471	0.000690388	m
FBgn0233569	X	0.430559	0.000137977	m
FBgn0233571	X	-0.21166	1.45508e-07	f
FBgn0233573	X	2.06768	8.90986e-42	m
FBgn0233574	X	-0.670062	0.00223639	f
FBgn0233577	X	0.31715	0.000779626	m
FBgn0233578	X	0.564434	6.23729e-08	m
FBgn0233579	X	0.950141	4.77163e-10	m
FBgn0233581	2L	-0.708279	0.000143312	f
FBgn0233585	X	-1.22503	3.82658e-05	f
FBgn0233594	X	0.579569	2.72458e-12	m
FBgn0233595	X	0.453461	1.02762e-13	m
FBgn0233597	X	0.257251	0.00564774	m
FBgn0233603	X	-0.652413	0.0281835	f
FBgn0233605	X	0.278064	0.00101104	m
FBgn0233606	X	0.33242	0.0499736	m
FBgn0233618	X	-0.221383	0.0355861	f
FBgn0233632	2L	-0.34711	0.0011269	f
FBgn0233635	X	0.397894	0.0102241	m
FBgn0233639	X	-0.596603	0.0017922	f
FBgn0233658	X	-1.17153	0.017416	f
FBgn0233661	X	-0.908387	0.0254158	f
FBgn0233664	X	0.146304	0.00233517	m
FBgn0233682	X	0.164079	0.0263105	m
FBgn0233690	X	0.306016	0.0127993	m
FBgn0233692	X	0.14663	0.0306059	m
FBgn0233693	X	-0.17999	0.0225976	f
FBgn0233696	X	2.32689	2.88698e-24	m
FBgn0233703	X	-0.130067	0.0166259	f
FBgn0233704	X	0.265749	0.00520291	m
FBgn0233707	X	0.235286	0.00492612	m
FBgn0233713	X	0.204096	0.00644198	m
FBgn0233718	X	0.277288	5.82543e-06	m
FBgn0233730	X	-0.361123	0.00205456	f
FBgn0233733	X	-0.180357	0.0414743	f
FBgn0233735	X	-0.526864	0.0162258	f
FBgn0233749	X	0.187193	0.0115033	m
FBgn0233750	X	-0.271304	0.0318387	f
FBgn0233754	X	2.96693	2.44093e-13	m
FBgn0233764	X	0.307726	4.24372e-10	m
FBgn0233769	X	0.30476	0.0225633	m
FBgn0233770	X	0.873697	0.0353782	m
FBgn0233771	X	0.28409	0.00453335	m
FBgn0233777	X	0.330544	4.44712e-05	m
FBgn0233779	X	1.72591	5.77638e-12	m
FBgn0233782	X	0.49305	4.32422e-10	m
FBgn0233784	X	1.1007	0.00758541	m
FBgn0233792	X	0.24723	4.79197e-05	m
FBgn0233802	X	0.224108	0.0126823	m
FBgn0233806	X	0.615614	1.56353e-19	m
FBgn0233811	X	0.261684	0.0275321	m
FBgn0233812	X	0.967567	6.21219e-45	m
FBgn0233813	X	8.287	1.97893e-89	m
FBgn0233814	X	2.25988	0.0048078	m
FBgn0233815	X	5.16897	0.0330575	m
FBgn0233834	X	-4.75423	0.0145071	f
FBgn0233849	X	0.934024	0.00256091	m
FBgn0233853	X	0.291244	0.000451346	m
FBgn0233880	X	0.26721	0.0177657	m
FBgn0233882	X	0.318635	0.0383171	m
FBgn0233890	X	-0.175484	0.00152793	f
FBgn0233904	X	-0.213273	0.00472884	f
FBgn0233906	X	0.313298	3.72344e-07	m
FBgn0233924	X	0.311204	5.49191e-06	m
FBgn0233940	X	2.04212	1.55554e-43	m
FBgn0233941	X	0.198846	0.0200421	m
FBgn0233958	X	0.241328	0.000948787	m
FBgn0233963	X	0.913099	9.55435e-13	m
FBgn0233970	X	0.397621	0.0303378	m
FBgn0233972	X	0.418722	3.23687e-05	m
FBgn0233974	X	-0.256353	0.000287462	f
FBgn0233975	X	-0.156163	0.0486838	f
FBgn0233981	X	0.292291	0.00900856	m
FBgn0233982	2L	-0.341989	0.0117397	f
FBgn0234004	X	0.176732	0.0264316	m
FBgn0234008	X	0.375189	1.08357e-08	m
FBgn0234013	X	1.10253	0.0436218	m
FBgn0234024	X	2.27309	1.05263e-71	m
FBgn0234030	X	-0.244818	0.0228504	f
FBgn0234043	X	0.254575	0.00197582	m
FBgn0234045	X	0.625786	3.2572e-20	m
FBgn0234046	X	0.350939	9.09252e-06	m
FBgn0234047	X	-0.968296	0.000240517	f
FBgn0234048	X	-0.465533	0.000690634	f
FBgn0234054	X	0.356028	4.10965e-05	m
FBgn0234062	X	0.220421	0.026027	m
FBgn0234065	X	0.140907	0.0354187	m
FBgn0234071	X	0.557136	2.98619e-16	m
FBgn0234072	X	4.07405	2.71961e-20	m
FBgn0234084	X	-2.01722	0.00161215	f
FBgn0234096	X	0.208976	0.0126651	m
FBgn0234105	X	-0.560884	0.0202059	f
FBgn0234107	X	0.524012	0.037404	m
FBgn0234108	X	0.851049	0.00685975	m
FBgn0234113	X	-1.14569	0.0114595	f
FBgn0234116	X	0.586547	1.40067e-14	m
FBgn0234125	X	0.313066	0.000296686	m
FBgn0234128	X	0.487923	7.2627e-09	m
FBgn0234133	X	-0.15667	0.00473113	f
FBgn0234135	X	0.704758	0.000387672	m
FBgn0234138	X	0.497812	1.12653e-21	m
FBgn0234149	X	0.379968	0.0150178	m
FBgn0234153	X	0.587589	3.72525e-09	m
FBgn0234154	X	0.69428	3.51653e-05	m
FBgn0234155	X	0.746538	2.55913e-12	m
FBgn0234176	X	0.862704	3.04546e-06	m
FBgn0234179	X	-0.905372	0.000665555	f
FBgn0234182	X	-0.234451	0.00180425	f
FBgn0234187	X	-0.187355	0.0175981	f
FBgn0234208	X	-0.369859	0.00653045	f
FBgn0234209	X	0.5607	3.40344e-09	m
FBgn0234210	X	0.568522	9.24697e-05	m
FBgn0234218	X	2.65268	8.58516e-11	m
FBgn0234221	X	0.674715	0.0281889	m
FBgn0234224	X	0.21244	0.00472884	m
FBgn0234229	X	0.276335	0.000202012	m
FBgn0234243	X	-0.524741	1.51028e-06	f
FBgn0234245	X	0.154546	0.0367182	m
FBgn0234249	X	-0.390093	0.0282651	f
FBgn0234257	X	0.506501	5.01717e-06	m
FBgn0234258	X	1.31943	0.00702161	m
FBgn0234259	X	-0.246784	1.65987e-05	f
FBgn0234263	X	-0.383029	0.0161818	f
FBgn0234268	X	0.869115	1.0181e-37	m
FBgn0234269	X	2.11113	3.32372e-06	m
FBgn0234271	X	-0.126827	0.037404	f
FBgn0234272	X	-0.235678	6.72716e-05	f
FBgn0234282	X	-0.117404	0.032824	f
FBgn0234287	X	0.279141	0.000109028	m
FBgn0234304	X	-1.22996	0.00287447	f
FBgn0234312	X	3.81533	0.0393049	m
FBgn0234316	X	-0.905376	0.0032805	f
FBgn0234323	X	-0.751847	0.00457428	f
FBgn0234331	X	-0.303953	6.61477e-06	f
FBgn0234333	X	-0.21105	7.38508e-05	f
FBgn0234334	X	0.659845	0.000528302	m
FBgn0234340	X	0.933347	9.67329e-08	m
FBgn0234343	X	0.276023	0.00393228	m
FBgn0234366	X	-0.367461	0.0297436	f
FBgn0234367	X	0.238824	0.000543719	m
FBgn0234374	X	0.360372	0.00361838	m
FBgn0234376	X	-0.196003	0.000330286	f
FBgn0234377	X	0.557896	2.19916e-05	m
FBgn0234381	2L	-0.981092	0.0037895	f
FBgn0234384	X	-4.70197	0.00126735	f
FBgn0234408	X	-0.49624	0.00373431	f
FBgn0234409	X	-0.524155	1.1921e-34	f
FBgn0234411	X	-0.158605	0.0231916	f
FBgn0234412	X	0.293594	3.42372e-05	m
FBgn0234418	X	0.175042	0.00401036	m
FBgn0234420	X	-0.688812	6.84794e-09	f
FBgn0234421	X	1.2597	1.04533e-06	m
FBgn0234425	X	0.244492	1.96143e-05	m
FBgn0234426	X	-0.633853	0.000413109	f
FBgn0234431	X	0.809193	2.33195e-16	m
FBgn0234440	X	0.511706	9.78248e-05	m
FBgn0234451	X	0.337466	2.15265e-06	m
FBgn0234459	X	1.2791	1.93811e-21	m
FBgn0234460	X	3.06051	4.61079e-15	m
FBgn0234467	X	1.16962	2.22484e-18	m
FBgn0234470	X	0.194611	0.00360502	m
FBgn0234475	X	0.226059	0.00359556	m
FBgn0234477	X	0.266171	0.00173487	m
FBgn0234480	X	0.266302	1.1998e-05	m
FBgn0234482	X	2.40417	0.000399856	m
FBgn0234504	X	-0.441819	5.69928e-05	f
FBgn0234505	X	-0.249127	0.000408745	f
FBgn0234546	X	-0.285738	0.00665978	f
FBgn0234553	X	-0.84733	0.0142779	f
FBgn0234578	X	1.98078	3.11788e-11	m
FBgn0234581	X	0.304676	0.0209188	m
FBgn0234588	X	-6.47047	4.34509e-10	f
FBgn0234593	X	0.2494	0.000207244	m
FBgn0234595	X	-0.197868	0.00736842	f
FBgn0234609	X	0.353871	0.00101826	m
FBgn0234615	X	-0.431879	4.2962e-11	f
FBgn0234629	X	0.284157	0.0316475	m
FBgn0234640	X	0.356749	4.84148e-08	m
FBgn0234641	X	-1.36167	3.68476e-40	f
FBgn0234642	X	3.02615	0.000240161	m
FBgn0234654	X	-0.204334	0.00695878	f
FBgn0234659	X	-0.16299	7.29922e-06	f
FBgn0234681	X	-1.50363	0.00547122	f
FBgn0234683	X	2.70003	0.0193554	m
FBgn0234692	X	0.424276	4.22489e-12	m
FBgn0234693	X	0.564124	2.59296e-08	m
FBgn0234695	X	0.265533	0.000316186	m
FBgn0234697	X	0.421042	0.0017591	m
FBgn0234700	X	1.11096	1.23262e-17	m
FBgn0234702	X	0.452583	1.6826e-05	m
FBgn0234707	X	0.795782	1.87638e-10	m
FBgn0234708	X	-0.180242	0.0300134	f
FBgn0234716	X	-0.14313	1.1215e-06	f
FBgn0234723	X	0.6803	9.34418e-14	m
FBgn0234724	X	2.30322	1.22468e-13	m
FBgn0234740	X	0.508013	4.79965e-05	m
FBgn0234741	X	-0.221664	0.0436218	f
FBgn0234742	X	0.151759	0.0129192	m
FBgn0234746	X	-0.16215	0.017416	f
FBgn0234747	X	0.440682	0.00128384	m
FBgn0234757	X	0.524019	0.000708246	m
FBgn0234761	X	0.429432	0.00262319	m
FBgn0234765	X	1.85655	5.55252e-22	m
FBgn0234778	X	-0.50464	0.0035999	f
FBgn0234796	X	-0.271262	0.000170282	f
FBgn0234802	X	-0.306844	0.0142714	f
FBgn0234807	X	0.100886	0.00702249	m
FBgn0234810	X	0.278124	0.00525352	m
FBgn0234819	X	1.18331	0.000175315	m
FBgn0234826	X	2.11335	8.17231e-109	m
FBgn0234828	X	0.276512	0.00916897	m
FBgn0234832	X	0.290566	5.39545e-06	m
FBgn0234838	X	0.474526	4.95616e-19	m
FBgn0234839	X	1.24645	9.39791e-14	m
FBgn0234841	X	0.219958	0.00432221	m
FBgn0234848	X	0.372289	9.0672e-10	m
FBgn0234852	X	0.306978	0.0243646	m
FBgn0234872	X	-0.698715	2.24389e-05	f
FBgn0234879	X	0.370321	3.63025e-05	m
FBgn0234880	X	-0.245282	0.00240012	f
FBgn0234887	X	-0.380836	0.000276372	f
FBgn0234888	X	-1.01153	0.000543719	f
FBgn0234899	X	-0.22041	0.00472884	f
FBgn0234900	X	0.5081	5.32343e-09	m
FBgn0234901	X	0.360836	0.000141035	m
FBgn0234909	X	-2.87763	0.000172356	f
FBgn0234912	X	0.913031	1.35295e-07	m
FBgn0234913	X	0.280061	0.000398377	m
FBgn0234916	X	-1.16327	0.0081268	f
FBgn0234922	X	0.261763	0.0129847	m
FBgn0234924	X	-0.307378	0.000709379	f
FBgn0234925	X	0.230811	3.63327e-05	m
FBgn0234929	X	-0.677984	1.13e-06	f
FBgn0234933	X	-0.303211	0.000205875	f
FBgn0234940	X	0.253684	1.12655e-07	m
FBgn0234943	X	0.389371	0.00266107	m
FBgn0234950	X	-0.604318	0.00563499	f
FBgn0234953	X	-2.6782	1.50935e-31	f
FBgn0234963	X	1.6754	1.23548e-06	m
FBgn0234965	X	-4.0559	0.0078388	f
FBgn0234973	X	0.205865	0.0436896	m
FBgn0234974	X	-0.401652	2.80942e-13	f
FBgn0234989	X	1.86049	0.0146372	m
FBgn0234991	X	-0.177209	0.0102241	f
FBgn0234999	X	-0.363394	2.86803e-14	f
FBgn0235003	X	-0.840073	0.0130494	f
FBgn0235008	X	-0.196076	0.0053646	f
FBgn0235013	X	-0.344003	2.48188e-10	f
FBgn0235018	X	-0.332472	0.000350053	f
FBgn0235022	X	-0.401287	0.00014112	f
FBgn0235027	X	1.00795	0.00800776	m
FBgn0235035	X	2.26447	1.5961e-06	m
FBgn0235050	X	3.59468	0.010101	m
FBgn0235063	X	0.709957	4.12986e-09	m
FBgn0235064	X	0.240514	3.49027e-05	m
FBgn0235067	X	-1.28147	4.95741e-29	f
FBgn0235069	X	-1.41218	0.0115033	f
FBgn0235080	X	0.347787	0.00411091	m
FBgn0235084	X	2.03557	1.33995e-60	m
FBgn0235121	X	0.167968	0.0490142	m
FBgn0235123	X	0.332074	0.010547	m
FBgn0235125	X	-0.235418	0.000155841	f
FBgn0235149	X	0.440549	5.98296e-30	m
FBgn0235157	X	0.490012	0.00967269	m
FBgn0235207	X	0.142293	0.043502	m
FBgn0235219	X	-0.244566	0.000171545	f
FBgn0235222	X	0.145205	0.0388406	m
FBgn0235224	X	-0.728785	0.00434652	f
FBgn0235228	X	0.151433	0.0410324	m
FBgn0235231	X	0.240822	0.0258592	m
FBgn0235237	X	-0.277346	1.89479e-05	f
FBgn0235248	X	-0.934024	7.38508e-05	f
FBgn0235257	X	0.470019	0.000544751	m
FBgn0235266	X	-0.267023	0.0199282	f
FBgn0235268	X	-6.14461	1.56289e-09	f
FBgn0235283	X	-0.202347	0.000368256	f
FBgn0235289	X	0.300103	0.012963	m
FBgn0235301	X	0.132594	0.0388406	m
FBgn0235303	X	2.39955	0.0220356	m
FBgn0235321	X	0.263708	0.0107638	m
FBgn0235324	X	1.21585	2.50751e-28	m
FBgn0235330	X	-0.535995	0.00890685	f
FBgn0235339	X	-0.527861	1.48747e-10	f
FBgn0235344	X	-0.351886	1.22231e-07	f
FBgn0235346	X	0.653504	0.0320685	m
FBgn0235354	X	0.170232	0.00033231	m
FBgn0235359	X	-0.178008	0.00066121	f
FBgn0235362	X	0.0921827	0.0372786	m
FBgn0235363	X	0.752347	0.000571627	m
FBgn0235375	X	0.708564	1.96109e-09	m
FBgn0235450	3L	0.280498	0.0287766	m
FBgn0235596	2L	0.573295	0.0050329	m
FBgn0235606	2L	0.357227	0.00188093	m
FBgn0235612	2L	-0.831728	0.0200421	f
FBgn0235649	2L	-0.365438	1.4121e-05	f
FBgn0235673	2L	0.785417	0.00536912	m
FBgn0235675	2L	-0.427384	0.0408834	f
FBgn0235709	2L	-1.33491	1.68422e-07	f
FBgn0235760	2L	1.24917	0.0236099	m
FBgn0235765	2L	-0.64567	0.00299167	f
FBgn0235781	2L	-0.314559	0.00239094	f
FBgn0235794	2L	-0.457534	0.0275393	f
FBgn0235802	2L	-0.496951	0.00162417	f
FBgn0235857	2L	0.239096	0.0400148	m
FBgn0235859	2L	-0.223916	0.0368245	f
FBgn0235863	2L	-0.831203	0.00402159	f
FBgn0235922	2L	-0.124321	0.0456524	f
FBgn0235956	2L	-0.370498	0.0402872	f
FBgn0235957	2L	-0.847684	0.00143396	f
FBgn0236101	2L	0.186122	0.00921665	m
FBgn0236109	2L	-0.424835	8.25904e-09	f
FBgn0236272	2L	1.04268	0.046499	m
FBgn0236289	2L	-0.197632	0.049029	f
FBgn0236330	2L	-0.177503	0.0117304	f
FBgn0236339	2L	0.209136	0.0457734	m
FBgn0236376	2L	-0.530869	8.22893e-06	f
FBgn0236383	2L	-0.9596	0.0263932	f
FBgn0236400	2L	-0.149675	0.000558101	f
FBgn0236409	2L	-3.16997	0.00107157	f
FBgn0236442	2L	-0.434281	0.0301699	f
FBgn0236458	2L	0.883566	0.0435869	m
FBgn0236490	2L	0.13972	0.0354187	m
FBgn0236503	2L	0.198676	0.0417707	m
FBgn0236528	2L	-0.989213	0.0148122	f
FBgn0236612	2L	-0.459959	0.0439126	f
FBgn0236656	2L	-0.266537	0.00889131	f
FBgn0236676	2L	0.213519	0.0160511	m
FBgn0236701	2L	-0.898348	5.37456e-09	f
FBgn0236752	2L	-0.426553	0.0286686	f
FBgn0236764	2L	0.389705	0.000610221	m
FBgn0236780	2L	2.8265	5.73987e-08	m
FBgn0236858	3L	0.179023	7.21954e-05	m
FBgn0236996	3L	-2.2145	0.00420719	f
FBgn0237024	3L	0.269839	0.0119785	m
FBgn0237110	3L	-0.111034	0.0455931	f
FBgn0237143	chrYh	5.65724	2.5519e-06	m
FBgn0237192	3L	0.220649	0.0276705	m
FBgn0237248	3L	-0.361208	0.00653045	f
FBgn0237260	3L	0.21411	0.0432805	m
FBgn0237261	3L	0.190837	0.0250753	m
FBgn0237302	3L	-0.184281	0.00746751	f
FBgn0237320	3L	-0.271551	0.00432092	f
FBgn0237326	3L	-0.183057	0.00593074	f
FBgn0237343	3L	-0.547321	6.58739e-05	f
FBgn0237346	3L	-0.588441	5.39545e-06	f
FBgn0237362	3L	0.285593	1.33888e-05	m
FBgn0237377	3L	2.97193	0.0401087	m
FBgn0237447	3L	0.189927	0.00488579	m
FBgn0237467	3L	0.174518	0.0231706	m
FBgn0237566	3L	0.327534	0.00865183	m
FBgn0237568	3L	0.251716	6.20913e-05	m
FBgn0237618	3L	-0.870428	1.26965e-09	f
FBgn0237619	3L	-0.811274	0.00017894	f
FBgn0237717	3L	-2.09488	0.0100652	f
FBgn0237723	3L	-0.831745	0.0461681	f
FBgn0237738	3L	-0.893496	8.16389e-07	f
FBgn0237741	3L	-0.529347	0.00563607	f
FBgn0237782	3L	-0.425446	0.00401282	f
FBgn0237804	3L	-0.908888	4.45909e-55	f
FBgn0237809	3L	-0.348195	0.0431438	f
FBgn0237834	3L	-0.331756	0.000243425	f
FBgn0237867	3L	-0.323804	0.000119049	f
FBgn0237874	3L	0.134667	0.039384	m
FBgn0237918	3L	4.54192	0.00301915	m
FBgn0237937	3L	0.351301	0.00758271	m
FBgn0237950	3L	0.173953	8.52721e-05	m
FBgn0237956	3L	0.185585	0.00014112	m
FBgn0237979	3L	0.249181	0.0208026	m
FBgn0237990	3L	0.143118	0.00375035	m
FBgn0238035	3L	-0.205603	0.00229185	f
FBgn0238036	3L	-0.422833	0.00653045	f
FBgn0238058	2L	-1.19206	0.00307165	f
FBgn0238098	3L	-0.331813	0.0178054	f
FBgn0238125	3L	1.25807	0.00878252	m
FBgn0238153	3L	0.181384	0.021355	m
FBgn0238164	3L	0.290697	0.0199008	m
FBgn0238188	3L	-0.476777	6.03245e-08	f
FBgn0238207	3L	-1.50057	2.27538e-47	f
FBgn0238230	3L	-0.162369	0.00558902	f
FBgn0238293	3L	-0.154523	0.0461681	f
FBgn0238296	3L	-0.711773	0.0117715	f
FBgn0238299	3L	0.312742	0.00873475	m
FBgn0238327	3L	0.238568	0.00350258	m
FBgn0238354	3L	0.308264	0.023223	m
FBgn0238379	2L	-0.731621	0.0487159	f
FBgn0238398	3L	-1.11626	0.00952328	f
FBgn0238436	3L	0.249348	0.0179224	m
FBgn0238558	3L	-2.72978	0.00126421	f
FBgn0238658	2L	-0.18255	0.00146729	f
FBgn0238660	3L	-1.1145	0.000748327	f
FBgn0238674	3L	-0.174696	0.000806284	f
FBgn0238704	3L	-0.170718	0.00311534	f
FBgn0238746	3L	0.230638	0.00665978	m
FBgn0238822	3L	0.174788	0.0314691	m
FBgn0238844	3L	-1.377	4.43825e-10	f
FBgn0238887	3L	-0.292372	0.0143882	f
FBgn0238922	3L	-0.191872	0.00217034	f
FBgn0238936	2L	0.625605	0.0139696	m
FBgn0238946	3L	0.168438	2.16693e-05	m
FBgn0238966	3L	-0.763871	4.91074e-16	f
FBgn0239042	2L	0.0862511	0.0207681	m
FBgn0239044	3L	-0.300296	0.00217034	f
FBgn0239054	3L	-0.676468	0.0107638	f
FBgn0239126	3L	-3.81831	8.34909e-06	f
FBgn0239128	2L	-0.208597	0.0336453	f
FBgn0239162	3L	0.148689	0.0238539	m
FBgn0239181	3L	0.23705	0.0212832	m
FBgn0239216	3L	-0.834348	1.04509e-05	f
FBgn0239247	3L	0.158435	3.63025e-05	m
FBgn0239251	3L	-0.36539	0.0106448	f
FBgn0239285	3L	-0.290361	0.00365938	f
FBgn0239306	3L	-0.3193	0.0401087	f
FBgn0239339	3L	0.222068	0.000913453	m
FBgn0239396	3L	0.199629	0.000278104	m
FBgn0239611	3L	0.108902	0.00834828	m
FBgn0239617	3L	-0.293988	2.87331e-05	f
FBgn0239641	3L	0.144976	0.025707	m
FBgn0239661	3L	0.204908	0.0461681	m
FBgn0239752	3L	-0.130531	0.00341433	f
FBgn0239944	v2_chr3L_random_238	-1.20995	3.16717e-08	f
FBgn0239946	v2_chr3L_random_236	-0.347691	0.00033231	f
FBgn0239983	v2_chr3L_random_170	0.504793	0.0249311	m
FBgn0240005	v2_chr3L_random_135	0.228306	0.0170279	m
FBgn0240061	v2_chr3L_random_068	7.90364	5.96186e-83	m
FBgn0240065	v2_chr3L_random_067	6.5428	1.09184e-89	m
FBgn0240066	v2_chr3L_random_067	4.40835	1.42711e-16	m
FBgn0240075	v2_chr3L_random_063	0.214041	0.018188	m
FBgn0240079	v2_chr3L_random_063	0.227254	0.0059226	m
FBgn0240139	v2_chr3L_random_042	-0.167876	0.0456511	f
FBgn0240162	v2_chr3L_random_027	0.210574	0.00288779	m
FBgn0240424	v2_chr3L_random_218	0.207433	0.0152649	m
FBgn0240438	v2_chr3L_random_236	0.148402	0.0341379	m
FBgn0240464	2L	0.0940511	0.0382307	m
FBgn0240553	3R	2.052	1.12662e-14	m
FBgn0240592	3R	-1.02341	2.22836e-17	f
FBgn0240625	3R	-0.144185	0.0226085	f
FBgn0240646	3R	-0.277097	0.00702249	f
FBgn0240699	3R	-0.271739	1.41231e-05	f
FBgn0240705	3R	-0.429866	0.00203902	f
FBgn0240746	3R	0.116455	0.0387826	m
FBgn0240759	3R	0.266336	0.00216633	m
FBgn0240760	3R	-1.11048	0.00195518	f
FBgn0240787	3R	-0.393599	3.54338e-05	f
FBgn0240815	2L	0.386979	0.0209188	m
FBgn0240827	3R	0.919024	0.0251815	m
FBgn0240893	3R	1.65824	0.0132116	m
FBgn0240929	3R	0.212076	0.000260158	m
FBgn0240996	3R	-0.549095	6.63934e-06	f
FBgn0241003	3R	-3.55885	0.0281835	f
FBgn0241004	3R	-1.79669	0.0167297	f
FBgn0241075	3R	-0.96413	0.0246235	f
FBgn0241082	3R	0.313005	0.02353	m
FBgn0241144	3R	0.370874	0.0112119	m
FBgn0241175	2L	-1.0232	0.000429103	f
FBgn0241204	3R	0.148049	0.000622111	m
FBgn0241205	3R	0.144416	0.00698118	m
FBgn0241213	3R	-0.658742	0.00036901	f
FBgn0241215	3R	-5.527	2.02026e-41	f
FBgn0241291	2L	1.4231	0.0179957	m
FBgn0241335	3R	0.301151	0.0493447	m
FBgn0241392	3R	0.213811	0.0145071	m
FBgn0241413	3R	0.320125	0.0155771	m
FBgn0241478	3R	-0.815904	0.00457965	f
FBgn0241489	3R	1.34932	0.000588089	m
FBgn0241539	3R	-0.124703	0.0113519	f
FBgn0241567	3R	0.159279	0.0255128	m
FBgn0241604	3R	0.123168	0.0410806	m
FBgn0241696	3R	0.155077	8.61925e-05	m
FBgn0241699	3R	0.265679	0.0384138	m
FBgn0241712	3R	-0.970495	0.0278914	f
FBgn0241740	3R	0.164093	0.00144991	m
FBgn0241742	2L	-0.124683	0.00768421	f
FBgn0241777	3R	-0.414988	0.00547122	f
FBgn0241782	2L	0.22042	3.00788e-05	m
FBgn0241792	3R	0.119765	0.0499736	m
FBgn0241800	3R	-0.237468	0.00266233	f
FBgn0241851	3R	0.187531	0.00401036	m
FBgn0241921	2L	-1.47867	3.68294e-27	f
FBgn0241953	3R	0.240507	0.0107779	m
FBgn0242002	3R	0.246992	0.0010702	m
FBgn0242073	3R	-0.115382	0.0118877	f
FBgn0242120	3R	-0.415543	1.1197e-09	f
FBgn0242125	3R	-0.16184	0.0234011	f
FBgn0242158	3R	0.380208	2.29071e-08	m
FBgn0242184	3R	0.654945	0.023907	m
FBgn0242207	3R	0.290038	0.00497817	m
FBgn0242267	3R	-0.51277	0.00014278	f
FBgn0242287	2L	-0.841737	0.00275323	f
FBgn0242356	3R	0.111981	0.012086	m
FBgn0242383	3R	-0.157185	0.0460476	f
FBgn0242419	3R	0.318774	0.00108713	m
FBgn0242421	2L	-1.05121	0.00036901	f
FBgn0242550	2L	-0.274695	0.0045359	f
FBgn0242577	3R	0.823996	0.000245551	m
FBgn0242619	3R	0.221508	0.0482391	m
FBgn0242638	3R	-0.295649	0.0200421	f
FBgn0242647	3R	-0.272572	7.38508e-05	f
FBgn0242683	3R	0.312964	0.037404	m
FBgn0242752	3R	-1.76357	0.0394989	f
FBgn0242755	3R	0.255525	0.0204994	m
FBgn0242788	3R	-0.257716	0.00881657	f
FBgn0242815	3R	2.06065	2.96993e-23	m
FBgn0242845	3R	-0.150582	0.00133474	f
FBgn0242869	3R	-0.621251	4.70811e-15	f
FBgn0242903	3R	-2.0268	1.63778e-07	f
FBgn0242914	3R	0.239037	0.0111497	m
FBgn0242961	3R	0.25425	0.0296976	m
FBgn0242964	3R	0.185832	0.00616113	m
FBgn0243013	3R	0.184122	0.00408464	m
FBgn0243039	3R	-0.518228	0.0303378	f
FBgn0243092	3R	-0.339437	0.047059	f
FBgn0243128	3R	0.187651	0.00160096	m
FBgn0243131	3R	0.23027	0.00380502	m
FBgn0243233	3R	0.181165	0.00101104	m
FBgn0243242	3R	-2.97463	0.0100966	f
FBgn0243250	3R	0.211508	0.0417707	m
FBgn0243296	3R	-3.90603	0.0199046	f
FBgn0243405	3R	0.310554	0.00508767	m
FBgn0243445	3R	-0.448563	0.018981	f
FBgn0243462	3R	-0.318222	0.0105103	f
FBgn0258311	v2_chrUn_252	0.635579	0.0170279	m
FBgn0258319	v2_chrUn_1311	0.702658	0.00503827	m
FBgn0258330	v2_chrUn_4933	0.643405	0.0157738	m
FBgn0258331	v2_chrUn_5158	0.723825	0.00466191	m
FBgn0258333	v2_chrUn_5394	0.79788	0.0493447	m
FBgn0258335	v2_chrUn_5502	0.746199	0.00695194	m
FBgn0259025	X	-0.364829	0.0319539	f
FBgn0259033	X	-2.02617	0.000384737	f
FBgn0259036	X	-2.34056	0.000708246	f
FBgn0259042	X	1.01847	0.0203947	m
FBgn0259048	X	1.71409	0.0190936	m
FBgn0275452	X	1.40209	1.44716e-06	m
FBgn0275471	v2_chrUn_6910	3.87546	1.05672e-46	m
FBgn0275501	v2_chrUn_1752	7.01508	3.01615e-22	m
FBgn0275511	v2_chrUn_3896	6.05087	2.28254e-12	m
FBgn0275515	v2_chrUn_2456	4.21631	0.00057827	m
FBgn0275529	3L	-1.38424	1.01786e-09	f
FBgn0275556	v2_chrUn_061	7.4536	3.67676e-15	m
FBgn0275557	2L	-0.172314	0.0443264	f
FBgn0275576	v2_chrUn_875	2.9578	5.78648e-51	m
FBgn0275590	2L	-0.945708	0.00146578	f
FBgn0275610	3L	-0.241179	0.000165862	f
FBgn0275635	v2_chr2h_random_005	1.19908	0.0249059	m
FBgn0275641	v2_chrUn_2616	4.92476	0.00415091	m
FBgn0275680	v2_chr3R_random_487	-0.484118	4.15005e-06	f
FBgn0275689	X	0.16698	0.000555169	m
FBgn0275690	3L	-1.13233	2.9805e-06	f
FBgn0275731	X	0.847223	7.06445e-11	m
FBgn0275742	v2_chrUn_5782	8.59358	2.08082e-09	m
FBgn0275768	v2_chrUn_6910	5.55817	4.47231e-36	m
FBgn0275796	X	-0.344486	0.00359556	f
FBgn0275849	3R	2.09507	0.00416921	m
FBgn0275852	v2_chrUn_073	7.28007	7.40782e-23	m
FBgn0275893	v2_chrUn_6102	6.16785	1.01786e-09	m
FBgn0275895	v2_chrUn_427	2.09024	0.00085666	m
FBgn0275905	X	3.66328	0.00192287	m
FBgn0275913	2R	0.124136	0.0498532	m
FBgn0275929	3L	0.405727	0.0490312	m
FBgn0275951	v2_chr3R_random_176	-4.21659	0.00558988	f
FBgn0276016	v2_chrUn_5942	6.38166	7.50358e-08	m
FBgn0276066	v2_chrUn_6681	4.02214	4.84812e-05	m
FBgn0276104	v2_chrUn_3433	5.18489	0.000277556	m
FBgn0276117	v2_chrUn_2397	-0.608478	0.00592803	f
FBgn0276154	2L	-0.261367	0.0213423	f
FBgn0276182	v2_chrUn_6331	5.59592	8.02981e-14	m
FBgn0276192	v2_chrUn_433	10.5164	2.37199e-46	m
FBgn0276210	v2_chr2h_random_021	4.37924	7.39167e-15	m
FBgn0276262	v2_chrUn_1017	-0.344754	0.0277375	f
FBgn0276318	3R	1.11898	0.0145071	m
FBgn0276335	v2_chr2L_random_032	-0.882498	0.00120252	f
FBgn0276365	v2_chrUn_6929	1.29142	3.20284e-12	m
FBgn0276402	3R	0.242713	0.0315056	m
FBgn0276469	2R	0.122441	0.0400148	m
FBgn0276470	v2_chr2h_random_021	5.41076	3.13385e-10	m
FBgn0276475	v2_chrUn_6578	6.12587	4.57972e-12	m
FBgn0276513	v2_chrUn_4227	6.24023	2.99845e-24	m
FBgn0276535	3L	-1.35825	6.33909e-14	f
FBgn0276552	v2_chrUn_2738	9.6984	1.0168e-82	m
FBgn0276570	v2_chr3L_random_291	0.209385	0.0062407	m
FBgn0276616	2R	0.188051	0.0401087	m
FBgn0276656	X	2.27623	1.89479e-05	m
FBgn0276662	v2_chrUn_752	4.30989	1.87203e-18	m
FBgn0276672	v2_chrUn_3923	11.3328	1.49947e-38	m
FBgn0276690	v2_chrUn_1339	6.68826	1.13113e-10	m
FBgn0276730	v2_chrUn_5358	6.15166	2.9281e-16	m
FBgn0276733	3L	-0.508488	0.0090662	f
FBgn0276735	v2_chr2L_random_032	-0.548497	0.000116516	f
FBgn0276762	v2_chr3L_random_069	7.68679	2.96414e-23	m
FBgn0276774	v2_chrUn_572	3.87765	3.90534e-45	m
FBgn0276804	v2_chrUn_6829	6.30254	1.87203e-18	m
FBgn0276825	v2_chrUn_881	11.7814	6.87539e-59	m
FBgn0276850	v2_chrUn_077	11.1004	3.13426e-41	m
FBgn0276855	v2_chrUn_2262	-0.46897	0.0126823	f
FBgn0276885	3L	-0.55605	0.0378108	f
FBgn0276891	v2_chrUn_5782	10.5761	3.64097e-35	m
FBgn0276904	v2_chrUn_4531	2.45959	0.0150449	m
FBgn0276906	2R	-0.490207	1.62123e-08	f
FBgn0276970	v2_chrUn_4160	5.43393	4.93354e-06	m
FBgn0276977	v2_chrUn_2342	4.4497	3.02388e-05	m
FBgn0276997	v2_chrUn_3341	3.61222	1.52011e-54	m
FBgn0277031	v2_chrUn_065	13.1953	4.56767e-53	m
FBgn0277049	v2_chrUn_1067	7.13652	3.84242e-17	m
FBgn0277116	X	0.87416	8.78664e-13	m
FBgn0277139	v2_chrUn_6824	2.05141	0.00253872	m
FBgn0277144	v2_chrUn_3752	0.732752	1.21732e-05	m
FBgn0277177	X	3.80491	7.6048e-13	m
FBgn0277186	v2_chr3L_random_067	6.80446	6.83462e-11	m
FBgn0277215	X	1.49254	1.01786e-09	m
FBgn0277218	3R	-2.54731	0.00448711	f
FBgn0277228	2L	0.541233	0.0126651	m
FBgn0277230	chrYh	6.81169	3.1147e-11	m
FBgn0277236	v2_chrUn_665	0.702443	0.0107638	m
FBgn0277251	v2_chrUn_769	11.0195	7.3822e-73	m
FBgn0277260	v2_chrUn_533	12.1963	1.4185e-45	m
FBgn0277263	v2_chrUn_4625	5.13837	4.14729e-06	m
FBgn0277265	v2_chrUn_6215	8.50146	1.40094e-25	m
FBgn0277266	3R	-2.44974	1.94068e-87	f
FBgn0277282	v2_chrUn_3680	0.795061	0.00391368	m
FBgn0277291	v2_chrUn_6910	10.7509	1.38375e-38	m
FBgn0277336	v2_chrUn_4206	-0.278804	0.012086	f
FBgn0277354	2L	-1.86424	3.85893e-05	f
FBgn0277392	v2_chrUn_3178	-1.28687	1.72801e-06	f
