# Supplementary material for: The evolution of sex-biased gene expression in the Drosophila brain
Source: HighWire-hosted journal article supplement (doi:10.1101/gr.259069.119), 2020-06-01
Supplement: Supplementary_Table_S2.xlsx [file Supplementary_Table_S2.xlsx]

## Sheet: Legend
Table S2. Gene Ontology anslysis of diffferent sets of genes in D. melanogaster, D. simulans, and D. yakuba.
Column name	Description
GO biological process complete	GO term
all_exp.txt - REFLIST	Total number of expressed genes corresponding to term
observed	Number of genes in category of interest (i.e. female-biased autosomal) that correspond to term
expected	Number of genes in category of interest (i.e. female-biased autosomal) expected to correspond to term
over/under	Over/under represented
fold Enrichment	Fold enrichment
raw P-value	Significance of enrichment/depletion
FDR	Benjamini-Hochberg corrected p-value

## Sheet: f_a_dmel
GO analysis: female-biased autosomal genes in D. melanogaster
GO biological process complete	all_exp.txt - REFLIST	observed	expected	over/under	fold Enrichment	raw P-value	FDR
cellular macromolecule metabolic process (GO:0044260)	2099	77	132.29	-	0.58	4.3e-08	0.000337
protein localization (GO:0008104)	678	13	42.73	-	0.3	1.95e-07	0.000763
cellular macromolecule localization (GO:0070727)	592	12	37.31	-	0.32	3.3e-06	0.00517
macromolecule localization (GO:0033036)	821	22	51.74	-	0.43	4.85e-06	0.00542
intracellular protein transport (GO:0006886)	383	5	24.14	-	0.21	5.68e-06	0.00556
establishment of protein localization (GO:0045184)	466	8	29.37	-	0.27	6.45e-06	0.00561
macromolecule metabolic process (GO:0043170)	2953	132	186.11	-	0.71	4.37e-06	0.00571
cellular protein localization (GO:0034613)	541	10	34.1	-	0.29	2.93e-06	0.00575
cellular protein metabolic process (GO:0044267)	1555	56	98	-	0.57	2.4e-06	0.00627
peptide transport (GO:0015833)	453	8	28.55	-	0.28	1.24e-05	0.00969
protein transport (GO:0015031)	449	8	28.3	-	0.28	1.74e-05	0.0105
cellular localization (GO:0051641)	896	27	56.47	-	0.48	1.69e-05	0.0111
gene expression (GO:0010467)	1065	35	67.12	-	0.52	1.69e-05	0.0121
amide transport (GO:0042886)	458	9	28.87	-	0.31	3.47e-05	0.0194
cellular component organization or biogenesis (GO:0071840)	2607	118	164.31	-	0.72	4.12e-05	0.0215
drug catabolic process (GO:0042737)	57	14	3.59	+	3.9	5.99e-05	0.0293
cellular component organization (GO:0016043)	2463	112	155.23	-	0.72	9.5e-05	0.0438

## Sheet: m_a_dmel
GO analysis: male-biased autosomal genes in D. melanogaster
GO biological process complete	all_exp.txt - REFLIST	observed	expected	over/under	fold Enrichment	raw P-value	FDR
cellular respiration (GO:0045333)	114	23	5.19	+	4.43	2.27e-08	5.94e-05
aerobic respiration (GO:0009060)	56	17	2.55	+	6.67	1.03e-08	8.1e-05
generation of precursor metabolites and energy (GO:0006091)	177	29	8.06	+	3.6	2.12e-08	8.32e-05
energy derivation by oxidation of organic compounds (GO:0015980)	136	24	6.19	+	3.88	1.05e-07	0.000206
ion transport (GO:0006811)	447	47	20.36	+	2.31	4e-07	0.000627
phosphorylation (GO:0016310)	415	44	18.9	+	2.33	9.11e-07	0.00102
carboxylic acid metabolic process (GO:0019752)	349	39	15.89	+	2.45	1.38e-06	0.00108
organic acid metabolic process (GO:0006082)	365	40	16.62	+	2.41	1.27e-06	0.0011
transmembrane transport (GO:0055085)	546	53	24.86	+	2.13	8.52e-07	0.00111
oxoacid metabolic process (GO:0043436)	363	40	16.53	+	2.42	1.16e-06	0.00114
localization (GO:0051179)	2025	137	92.21	+	1.49	2.18e-06	0.00156
oxidative phosphorylation (GO:0006119)	83	16	3.78	+	4.23	5.29e-06	0.00276
ATP metabolic process (GO:0046034)	125	20	5.69	+	3.51	4.61e-06	0.00278
transport (GO:0006810)	1542	109	70.22	+	1.55	4.99e-06	0.00279
small molecule metabolic process (GO:0044281)	690	60	31.42	+	1.91	4.48e-06	0.00292
phosphate-containing compound metabolic process (GO:0006796)	813	67	37.02	+	1.81	6.48e-06	0.00317
electron transport chain (GO:0022900)	86	16	3.92	+	4.09	7.86e-06	0.00362
phosphorus metabolic process (GO:0006793)	831	67	37.84	+	1.77	1.21e-05	0.00527
respiratory electron transport chain (GO:0022904)	83	15	3.78	+	3.97	2.04e-05	0.0084
mitochondrial ATP synthesis coupled electron transport (GO:0042775)	73	14	3.32	+	4.21	2.15e-05	0.00841
ion transmembrane transport (GO:0034220)	258	29	11.75	+	2.47	2.38e-05	0.00887
establishment of localization (GO:0051234)	1600	109	72.86	+	1.5	2.93e-05	0.0104
tricarboxylic acid cycle (GO:0006099)	30	9	1.37	+	6.59	3.46e-05	0.0118
ATP synthesis coupled electron transport (GO:0042773)	77	14	3.51	+	3.99	3.61e-05	0.0118
anion transport (GO:0006820)	187	23	8.52	+	2.7	4.36e-05	0.0137
anion transmembrane transport (GO:0098656)	88	14	4.01	+	3.49	0.00013	0.0391
inorganic ion transmembrane transport (GO:0098660)	176	21	8.01	+	2.62	0.000137	0.0397

## Sheet: f_a_dsim
GO analysis: female-biased autosomal genes in D. simulans
GO biological process complete	all_exp.txt - REFLIST	observed	expected	over/under	fold Enrichment	raw P-value	FDR
neuropeptide signaling pathway (GO:0007218)	51	12	2.04	+	5.88	3.99e-06	0.0304

## Sheet: m_a_dsim
GO analysis: male-biased autosomal genes in D. simulans
GO biological process complete	all_exp.txt - REFLIST	observed	expected	over/under	fold Enrichment	raw P-value	FDR
ATP metabolic process (GO:0046034)	90	40	3.68	+	10.88	1.47e-25	1.13e-21
cellular respiration (GO:0045333)	86	39	3.51	+	11.11	3.42e-25	1.31e-21
energy derivation by oxidation of organic compounds (GO:0015980)	108	40	4.41	+	9.07	3.48e-23	8.85e-20
generation of precursor metabolites and energy (GO:0006091)	142	44	5.8	+	7.59	7.39e-23	1.41e-19
electron transport chain (GO:0022900)	63	32	2.57	+	12.44	5.36e-22	8.19e-19
respiratory electron transport chain (GO:0022904)	60	31	2.45	+	12.65	1.65e-21	2.1e-18
oxidative phosphorylation (GO:0006119)	59	30	2.41	+	12.45	1.07e-20	1.02e-17
mitochondrial ATP synthesis coupled electron transport (GO:0042775)	53	29	2.16	+	13.4	1.02e-20	1.12e-17
ATP synthesis coupled electron transport (GO:0042773)	54	29	2.21	+	13.15	1.52e-20	1.29e-17
mitochondrion organization (GO:0007005)	156	37	6.37	+	5.81	3.99e-16	3.05e-13
oxidation-reduction process (GO:0055114)	398	55	16.25	+	3.38	2.78e-14	1.93e-11
mitochondrial translation (GO:0032543)	88	26	3.59	+	7.24	1.62e-13	1.03e-10
mitochondrial gene expression (GO:0140053)	107	28	4.37	+	6.41	2.32e-13	1.37e-10
phosphorylation (GO:0016310)	342	46	13.97	+	3.29	1.06e-11	5.8e-09
aerobic respiration (GO:0009060)	40	17	1.63	+	10.41	2.83e-11	1.44e-08
metabolic process (GO:0008152)	3504	207	143.09	+	1.45	3.27e-11	1.56e-08
mitochondrial electron transport, NADH to ubiquinone (GO:0006120)	26	14	1.06	+	13.19	1.46e-10	6.57e-08
cellular metabolic process (GO:0044237)	3080	186	125.77	+	1.48	2.24e-10	9.51e-08
phosphorus metabolic process (GO:0006793)	688	65	28.09	+	2.31	8.12e-10	3.26e-07
phosphate-containing compound metabolic process (GO:0006796)	674	64	27.52	+	2.33	1.03e-09	3.94e-07
organonitrogen compound biosynthetic process (GO:1901566)	633	59	25.85	+	2.28	9.15e-09	3.33e-06
ATP biosynthetic process (GO:0006754)	17	10	0.69	+	14.41	3.54e-08	1.23e-05
proton transmembrane transport (GO:1902600)	45	14	1.84	+	7.62	4.25e-08	1.41e-05
translation (GO:0006412)	262	33	10.7	+	3.08	4.57e-08	1.45e-05
peptide biosynthetic process (GO:0043043)	266	33	10.86	+	3.04	6.33e-08	1.93e-05
nucleoside triphosphate biosynthetic process (GO:0009142)	26	11	1.06	+	10.36	9.94e-08	2.92e-05
amide biosynthetic process (GO:0043604)	289	34	11.8	+	2.88	1.27e-07	3.58e-05
small molecule metabolic process (GO:0044281)	567	52	23.15	+	2.25	1.35e-07	3.69e-05
purine nucleoside triphosphate metabolic process (GO:0009144)	21	10	0.86	+	11.66	1.62e-07	3.86e-05
purine nucleoside triphosphate biosynthetic process (GO:0009145)	21	10	0.86	+	11.66	1.62e-07	3.99e-05
purine ribonucleoside triphosphate metabolic process (GO:0009205)	21	10	0.86	+	11.66	1.62e-07	4.12e-05
nucleoside triphosphate metabolic process (GO:0009141)	28	11	1.14	+	9.62	1.82e-07	4.2e-05
purine ribonucleoside triphosphate biosynthetic process (GO:0009206)	21	10	0.86	+	11.66	1.62e-07	4.26e-05
energy coupled proton transport, down electrochemical gradient (GO:0015985)	16	9	0.65	+	13.78	2.33e-07	5.09e-05
ATP synthesis coupled proton transport (GO:0015986)	16	9	0.65	+	13.78	2.33e-07	5.24e-05
ion transport (GO:0006811)	373	39	15.23	+	2.56	2.95e-07	6.25e-05
cellular amide metabolic process (GO:0043603)	393	40	16.05	+	2.49	3.48e-07	7.18e-05
mitochondrial respiratory chain complex assembly (GO:0033108)	39	12	1.59	+	7.54	4.41e-07	8.42e-05
ribonucleoside triphosphate metabolic process (GO:0009199)	24	10	0.98	+	10.2	4.31e-07	8.43e-05
ribonucleoside triphosphate biosynthetic process (GO:0009201)	24	10	0.98	+	10.2	4.31e-07	8.66e-05
mitochondrial transport (GO:0006839)	76	16	3.1	+	5.16	4.68e-07	8.71e-05
biosynthetic process (GO:0009058)	1093	79	44.63	+	1.77	7.22e-07	0.000131
peptide metabolic process (GO:0006518)	329	35	13.43	+	2.61	1.09e-06	0.000193
ion transmembrane transport (GO:0034220)	220	27	8.98	+	3.01	1.27e-06	0.000221
cellular biosynthetic process (GO:0044249)	1041	75	42.51	+	1.76	2.12e-06	0.00036
regulation of biological process (GO:0050789)	3179	87	129.81	-	0.67	2.21e-06	0.000367
organic substance biosynthetic process (GO:1901576)	1054	75	43.04	+	1.74	3.6e-06	0.000586
tricarboxylic acid cycle (GO:0006099)	25	9	1.02	+	8.82	4.38e-06	0.000682
cellular nitrogen compound biosynthetic process (GO:0044271)	625	51	25.52	+	2	4.52e-06	0.00069
mitochondrial membrane organization (GO:0007006)	25	9	1.02	+	8.82	4.38e-06	0.000696
regulation of cellular process (GO:0050794)	2928	80	119.56	-	0.67	9.42e-06	0.00141
transmembrane transport (GO:0055085)	449	40	18.33	+	2.18	1.04e-05	0.00152
biological regulation (GO:0065007)	3533	104	144.27	-	0.72	1.7e-05	0.00244
aerobic electron transport chain (GO:0019646)	10	6	0.41	+	14.69	2.01e-05	0.00269
mitochondrial electron transport, ubiquinol to cytochrome c (GO:0006122)	10	6	0.41	+	14.69	2.01e-05	0.00273
regulation of gene expression (GO:0010468)	1278	25	52.19	-	0.48	1.97e-05	0.00278
mitochondrial electron transport, cytochrome c to oxygen (GO:0006123)	10	6	0.41	+	14.69	2.01e-05	0.00278
organonitrogen compound metabolic process (GO:1901564)	1985	117	81.06	+	1.44	2.2e-05	0.0029
cellular process (GO:0009987)	5168	251	211.03	+	1.19	2.39e-05	0.00309
inner mitochondrial membrane organization (GO:0007007)	17	7	0.69	+	10.08	2.62e-05	0.00328
inorganic ion transmembrane transport (GO:0098660)	147	19	6	+	3.17	2.58e-05	0.00328
cell differentiation (GO:0030154)	1321	27	53.94	-	0.5	3.61e-05	0.00445
multicellular organismal process (GO:0032501)	2487	67	101.56	-	0.66	4.26e-05	0.00516
nervous system development (GO:0007399)	935	16	38.18	-	0.42	4.47e-05	0.00533
regulation of RNA metabolic process (GO:0051252)	1042	19	42.55	-	0.45	4.74e-05	0.00557
tRNA aminoacylation (GO:0043039)	36	9	1.47	+	6.12	5.04e-05	0.00584
neurogenesis (GO:0022008)	793	12	32.38	-	0.37	5.48e-05	0.00624
ribose phosphate metabolic process (GO:0019693)	117	16	4.78	+	3.35	6.12e-05	0.00677
amino acid activation (GO:0043038)	37	9	1.51	+	5.96	6.06e-05	0.0068
purine ribonucleotide metabolic process (GO:0009150)	106	15	4.33	+	3.47	7.32e-05	0.00799
purine ribonucleotide biosynthetic process (GO:0009152)	60	11	2.45	+	4.49	8.98e-05	0.00952
monovalent inorganic cation transport (GO:0015672)	108	15	4.41	+	3.4	8.86e-05	0.00953
purine nucleotide metabolic process (GO:0006163)	110	15	4.49	+	3.34	0.000107	0.0112
regulation of nucleobase-containing compound metabolic process (GO:0019219)	1071	21	43.73	-	0.48	0.00012	0.0124
cytochrome complex assembly (GO:0017004)	23	7	0.94	+	7.45	0.000126	0.0128
system development (GO:0048731)	1448	33	59.13	-	0.56	0.000133	0.0132
generation of neurons (GO:0048699)	753	12	30.75	-	0.39	0.000135	0.0132
cation transport (GO:0006812)	222	23	9.07	+	2.54	0.000139	0.0132
purine nucleotide biosynthetic process (GO:0006164)	63	11	2.57	+	4.28	0.000132	0.0133
multicellular organism development (GO:0007275)	1827	46	74.61	-	0.62	0.000137	0.0133
oxoacid metabolic process (GO:0043436)	307	28	12.54	+	2.23	0.000142	0.0134
primary metabolic process (GO:0044238)	3014	159	123.08	+	1.29	0.000145	0.0135
organic acid metabolic process (GO:0006082)	308	28	12.58	+	2.23	0.000148	0.0136
ribonucleotide metabolic process (GO:0009259)	114	15	4.66	+	3.22	0.000153	0.0139
regulation of cellular macromolecule biosynthetic process (GO:2000112)	1063	21	43.41	-	0.48	0.000159	0.0143
carboxylic acid metabolic process (GO:0019752)	293	27	11.96	+	2.26	0.000172	0.0153
ribonucleotide biosynthetic process (GO:0009260)	67	11	2.74	+	4.02	0.000213	0.0183
regulation of macromolecule metabolic process (GO:0060255)	1636	40	66.81	-	0.6	0.000212	0.0184
anion transport (GO:0006820)	160	18	6.53	+	2.75	0.00021	0.0184
inorganic cation transmembrane transport (GO:0098662)	132	16	5.39	+	2.97	0.000219	0.0186
cellular developmental process (GO:0048869)	1360	31	55.54	-	0.56	0.000223	0.0187
tRNA aminoacylation for protein translation (GO:0006418)	35	8	1.43	+	5.6	0.000226	0.0187
nucleoside phosphate metabolic process (GO:0006753)	147	17	6	+	2.83	0.000233	0.0191
regulation of macromolecule biosynthetic process (GO:0010556)	1068	22	43.61	-	0.5	0.000243	0.0197
ribose phosphate biosynthetic process (GO:0046390)	69	11	2.82	+	3.9	0.000268	0.0215
positive regulation of cellular process (GO:0048522)	1222	27	49.9	-	0.54	0.000291	0.0229
cation transmembrane transport (GO:0098655)	150	17	6.13	+	2.78	0.00029	0.023
purine-containing compound biosynthetic process (GO:0072522)	70	11	2.86	+	3.85	0.000299	0.0231
regulation of nitrogen compound metabolic process (GO:0051171)	1494	36	61.01	-	0.59	0.000297	0.0232
protein-containing complex assembly (GO:0065003)	322	28	13.15	+	2.13	0.000338	0.0258
establishment of protein localization to mitochondrion (GO:0072655)	38	8	1.55	+	5.16	0.000366	0.0259
protein localization to mitochondrion (GO:0070585)	38	8	1.55	+	5.16	0.000366	0.0262
purine-containing compound metabolic process (GO:0072521)	124	15	5.06	+	2.96	0.000349	0.0264
protein targeting to mitochondrion (GO:0006626)	38	8	1.55	+	5.16	0.000366	0.0264
regulation of nucleic acid-templated transcription (GO:1903506)	924	18	37.73	-	0.48	0.000365	0.0265
regulation of transcription, DNA-templated (GO:0006355)	924	18	37.73	-	0.48	0.000365	0.0268
regulation of RNA biosynthetic process (GO:2001141)	924	18	37.73	-	0.48	0.000365	0.027
neuron differentiation (GO:0030182)	612	9	24.99	-	0.36	0.000363	0.0272
developmental process (GO:0032502)	2144	59	87.55	-	0.67	0.000408	0.0286
regulation of primary metabolic process (GO:0080090)	1516	37	61.91	-	0.6	0.000416	0.0289
regulation of biosynthetic process (GO:0009889)	1109	24	45.29	-	0.53	0.00042	0.0289
positive regulation of biological process (GO:0048518)	1382	33	56.43	-	0.58	0.000452	0.0308
cellular amino acid metabolic process (GO:0006520)	142	16	5.8	+	2.76	0.00046	0.0311
NADH dehydrogenase complex assembly (GO:0010257)	13	5	0.53	+	9.42	0.000507	0.0337
mitochondrial respiratory chain complex I assembly (GO:0032981)	13	5	0.53	+	9.42	0.000507	0.034
nucleotide metabolic process (GO:0009117)	144	16	5.88	+	2.72	0.00053	0.0349
regulation of cellular biosynthetic process (GO:0031326)	1105	24	45.12	-	0.53	0.000544	0.0352
compound eye development (GO:0048749)	314	2	12.82	-	0.16	0.000543	0.0354
nucleoside phosphate biosynthetic process (GO:1901293)	89	12	3.63	+	3.3	0.000566	0.0363
regulation of cellular metabolic process (GO:0031323)	1612	41	65.83	-	0.62	0.000581	0.037
anion transmembrane transport (GO:0098656)	77	11	3.14	+	3.5	0.000619	0.039
cellular protein-containing complex assembly (GO:0034622)	301	26	12.29	+	2.12	0.000651	0.0408
drug metabolic process (GO:0017144)	163	17	6.66	+	2.55	0.000693	0.043
nucleobase-containing small molecule metabolic process (GO:0055086)	189	19	7.72	+	2.46	0.000739	0.0455

## Sheet: m_x_dyak
GO analysis: male-biased X chromosome genes in D. yakuba
GO biological process complete	all_exp.txt - REFLIST	observed	expected	over/under	fold Enrichment	raw P-value	FDR
cell cycle process (GO:0022402)	452	30	11.63	+	2.58	3.71e-06	0.0286
nuclear chromosome segregation (GO:0098813)	117	13	3.01	+	4.32	2.2e-05	0.0424

## Sheet: f_a_dyak
GO analysis: female-biased autosomal genes in D. yakuba
GO biological process complete	all_exp.txt - REFLIST	observed	expected	over/under	fold Enrichment	raw P-value	FDR
amino sugar catabolic process (GO:0046348)	15	6	0.29	+	20.79	1.79e-06	0.00691
glucosamine-containing compound catabolic process (GO:1901072)	15	6	0.29	+	20.79	1.79e-06	0.0138
chitin catabolic process (GO:0006032)	13	5	0.25	+	19.99	1.6e-05	0.041

## Sheet: m_a_dyak
GO analysis: male-biased autosomal genes in D. yakuba
GO biological process complete	all_exp.txt - REFLIST	observed	expected	over/under	fold Enrichment	raw P-value	FDR
cellular respiration (GO:0045333)	100	15	1.58	+	9.52	2.33e-10	8.96e-07
ATP metabolic process (GO:0046034)	106	15	1.67	+	8.98	4.84e-10	1.24e-06
generation of precursor metabolites and energy (GO:0006091)	158	18	2.49	+	7.23	2.07e-10	1.6e-06
energy derivation by oxidation of organic compounds (GO:0015980)	122	15	1.92	+	7.81	2.81e-09	5.42e-06
oxidation-reduction process (GO:0055114)	448	27	7.06	+	3.83	3.68e-09	5.67e-06
aerobic respiration (GO:0009060)	48	10	0.76	+	13.23	1.66e-08	2.14e-05
small molecule metabolic process (GO:0044281)	609	29	9.59	+	3.02	1.31e-07	0.000145
oxidative phosphorylation (GO:0006119)	69	10	1.09	+	9.2	3.48e-07	0.000335
electron transport chain (GO:0022900)	73	10	1.15	+	8.7	5.57e-07	0.000476
ATP synthesis coupled electron transport (GO:0042773)	64	9	1.01	+	8.93	1.72e-06	0.0011
tricarboxylic acid cycle (GO:0006099)	31	7	0.49	+	14.34	1.59e-06	0.00111
mitochondrial ATP synthesis coupled electron transport (GO:0042775)	63	9	0.99	+	9.07	1.52e-06	0.00117
respiratory electron transport chain (GO:0022904)	70	9	1.1	+	8.16	3.36e-06	0.00199
proton transmembrane transport (GO:1902600)	54	8	0.85	+	9.41	4.65e-06	0.00256
oxoacid metabolic process (GO:0043436)	329	18	5.18	+	3.47	6.8e-06	0.00349
organic acid metabolic process (GO:0006082)	331	18	5.21	+	3.45	7.37e-06	0.00355
carboxylic acid metabolic process (GO:0019752)	315	17	4.96	+	3.43	1.48e-05	0.00668
mitochondrion organization (GO:0007005)	165	12	2.6	+	4.62	1.89e-05	0.00811
purine ribonucleotide metabolic process (GO:0009150)	116	10	1.83	+	5.47	2.49e-05	0.0101
energy coupled proton transport, down electrochemical gradient (GO:0015985)	19	5	0.3	+	16.71	2.82e-05	0.0103
ATP synthesis coupled proton transport (GO:0015986)	19	5	0.3	+	16.71	2.82e-05	0.0109
purine nucleotide metabolic process (GO:0006163)	120	10	1.89	+	5.29	3.27e-05	0.0114
mitochondrial protein processing (GO:0034982)	9	4	0.14	+	28.22	3.57e-05	0.0115
ATP biosynthetic process (GO:0006754)	20	5	0.32	+	15.87	3.48e-05	0.0117
phosphate-containing compound metabolic process (GO:0006796)	727	27	11.45	+	2.36	3.82e-05	0.0118
protein folding (GO:0006457)	99	9	1.56	+	5.77	4.36e-05	0.0124
ribonucleotide metabolic process (GO:0009259)	124	10	1.95	+	5.12	4.24e-05	0.0126
ribose phosphate metabolic process (GO:0019693)	127	10	2	+	5	5.13e-05	0.0136
phosphorus metabolic process (GO:0006793)	742	27	11.69	+	2.31	5.08e-05	0.014
nucleotide metabolic process (GO:0009117)	156	11	2.46	+	4.48	5.55e-05	0.0142
neurotransmitter metabolic process (GO:0042133)	24	5	0.38	+	13.23	7.4e-05	0.0158
nucleoside phosphate metabolic process (GO:0006753)	159	11	2.5	+	4.39	6.52e-05	0.0162
purine nucleoside triphosphate metabolic process (GO:0009144)	24	5	0.38	+	13.23	7.4e-05	0.0163
purine nucleoside triphosphate biosynthetic process (GO:0009145)	24	5	0.38	+	13.23	7.4e-05	0.0168
purine-containing compound metabolic process (GO:0072521)	135	10	2.13	+	4.7	8.29e-05	0.0173
purine ribonucleoside triphosphate metabolic process (GO:0009205)	24	5	0.38	+	13.23	7.4e-05	0.0173
purine ribonucleoside triphosphate biosynthetic process (GO:0009206)	24	5	0.38	+	13.23	7.4e-05	0.0178
ribonucleoside triphosphate metabolic process (GO:0009199)	27	5	0.43	+	11.76	0.000121	0.0239
ribonucleoside triphosphate biosynthetic process (GO:0009201)	27	5	0.43	+	11.76	0.000121	0.0245
ion transmembrane transport (GO:0034220)	240	13	3.78	+	3.44	0.000151	0.0291
carboxylic acid catabolic process (GO:0046395)	93	8	1.46	+	5.46	0.000167	0.0306
organic acid catabolic process (GO:0016054)	93	8	1.46	+	5.46	0.000167	0.0314
nucleoside triphosphate biosynthetic process (GO:0009142)	30	5	0.47	+	10.58	0.000188	0.0336
cellular amino acid catabolic process (GO:0009063)	49	6	0.77	+	7.77	0.000196	0.0343
nucleoside triphosphate metabolic process (GO:0009141)	32	5	0.5	+	9.92	0.000246	0.042
small molecule catabolic process (GO:0044282)	128	9	2.02	+	4.46	0.000272	0.0456
