# Supplementary material for: The evolution of sex-biased gene expression in the Drosophila brain
Source: HighWire-hosted journal article supplement (doi:10.1101/gr.259069.119), 2020-06-01
Supplement: Supplementary_Table_S3.xlsx [file Supplementary_Table_S3.xlsx]

## Sheet: Legend
Table S3.	Sex-biased genes which have ‘switched’ their sex-bias status in at least one species.
Column name	description
gene_id	Flybase ID of D. melanogaster ortholog
dmel_sex	sex-bias in D .mel (NS is unbiased)
dsim_sex	sex-bias in D. sim (NS is unbiased)
dyak_sex	sex-biased in D. yak (NS is unbiased)
f	Female-biased
m	Male_biased
NS	Unbiased

## Sheet: Gene_list
Sex-bias of orthologs
gene_id	dmel_sex	dsim_sex	dyak_sex
FBgn0031765	m	f	m
FBgn0263050	m	NS	f
FBgn0033033	m	NS	f
FBgn0264339	m	f	NS
FBgn0060296	m	f	NS
FBgn0285958	m	NS	f
FBgn0052179	m	NS	f
FBgn0027527	m	NS	f
FBgn0037448	m	f	m
FBgn0017577	m	NS	f
FBgn0260745	m	m	f
FBgn0039178	m	f	f
FBgn0261704	m	f	NS
FBgn0000826	m	m	f
FBgn0029573	m	m	f
FBgn0024365	m	m	f
FBgn0024364	m	m	f
FBgn0011606	m	m	f
FBgn0029768	m	NS	f
FBgn0030051	m	NS	f
FBgn0030137	m	f	m
FBgn0030360	m	NS	f
FBgn0030437	m	m	f
FBgn0030715	m	f	NS
FBgn0030745	m	NS	f
FBgn0030777	m	f	NS
FBgn0030816	m	f	NS
FBgn0030997	m	f	NS
FBgn0052512	m	m	f
FBgn0024251	m	NS	f
FBgn0044872	m	NS	f
FBgn0022355	NS	m	f
FBgn0037140	f	m	m
FBgn0027342	NS	m	f
FBgn0023522	f	m	m
FBgn0051997	NS	m	f
FBgn0030048	f	m	m
FBgn0014024	f	m	NS
FBgn0030339	NS	m	f
FBgn0259923	f	m	m
FBgn0086450	f	m	NS
FBgn0029929	f	m	f
FBgn0002709	f	m	m
FBgn0001612	NS	m	f
FBgn0026374	f	m	m
FBgn0029866	f	m	f
FBgn0052573	f	m	NS
FBgn0011297	f	m	NS
FBgn0030406	f	m	m
FBgn0040383	f	m	NS
FBgn0016034	NS	m	f
FBgn0030099	f	m	NS
FBgn0036995	f	m	NS
FBgn0054039	NS	m	f
FBgn0026872	NS	m	f
FBgn0029924	NS	f	m
FBgn0000316	f	f	m
FBgn0029915	f	NS	m
FBgn0263748	NS	f	m
FBgn0030027	NS	f	m
FBgn0030040	f	NS	m
FBgn0030787	f	NS	m
FBgn0031080	f	NS	m
FBgn0029719	f	NS	m
FBgn0029689	NS	f	m
FBgn0030927	NS	f	m
FBgn0031184	NS	f	m
FBgn0030102	f	NS	m
FBgn0025616	NS	f	m
FBgn0030039	NS	f	m
FBgn0031099	f	NS	m
FBgn0033475	f	NS	m
FBgn0029710	f	NS	m
FBgn0035231	f	f	m
FBgn0030697	NS	f	m
FBgn0030892	f	NS	m
FBgn0040373	f	NS	m
FBgn0029833	f	NS	m
FBgn0259098	NS	f	m
FBgn0015799	NS	f	m
FBgn0030329	f	f	m
FBgn0034379	f	NS	m
FBgn0261989	f	NS	m
FBgn0030447	f	NS	m
FBgn0031195	f	NS	m
FBgn0029819	f	f	m
FBgn0040850	NS	f	m
FBgn0051098	f	NS	m
FBgn0027588	f	f	m
FBgn0031703	f	NS	m
FBgn0031209	NS	f	m
FBgn0265190	f	NS	m
FBgn0261446	NS	f	m
FBgn0003559	NS	f	m
FBgn0030482	f	NS	m
FBgn0024897	f	NS	m
FBgn0038172	f	NS	m
