# Supplementary material for: The evolution of sex-biased gene expression in the Drosophila brain
Source: HighWire-hosted journal article supplement (doi:10.1101/gr.259069.119), 2020-06-01
Supplement: Supplementary_Table_S4.xlsx [file Supplementary_Table_S4.xlsx]

## Sheet: Legend
Tbale S4. Interspecific and intraspecific variability in males and females.
Column name	Description
gene_id	FlyBase ID
MS_sp	Mean sum of squares for species
MS_st	Mean sum of squares for strain
MS_sp/MS_st	MS_sp/MS_st
TPM_dmel	TPM of the genes in D. melanogaster.
TPM_dsim	TPM of the genes in D. simulans.
TPM_dyak	TPM of the genes in D. yakuba.

## Sheet: anova_male
Interspecific and intraspecific variability in males
gene_id	MS_sp	MS_st	MS_sp/MS_st	TPM_dmel	TPM_dsim	TPM_dyak
FBgn0250851	71.7168	0.00587082	12215.8	51.121	0.00161509	32.6767
FBgn0035795	78.0827	0.006932	11264.1	0	24.0859	0.557633
FBgn0259726	65.03	0.00943135	6895.09	75.7087	0.0930032	0.0703338
FBgn0026064	56.7714	0.013326	4260.21	0	0.812271	1.32178
FBgn0039341	99.8107	0.0252185	3957.84	0	33.8069	31.7296
FBgn0259933	58.3058	0.0150035	3886.14	59.9959	5.06414	0.0368149
FBgn0261839	69.4014	0.0212273	3269.44	0.0226962	28.7893	40.1069
FBgn0264605	74.4147	0.0228526	3256.3	9.10976	16.0578	5.80868e-06
FBgn0000116	31.724	0.0106551	2977.36	137.401	3896.8	3693.13
FBgn0044419	32.8464	0.0157679	2083.12	89.2202	127.558	1.60292
FBgn0260237	56.6988	0.0281938	2011.04	57.3243	0.0733632	0.301507
FBgn0035413	80.6438	0.0460359	1751.76	0	0.797373	14.2113
FBgn0038285	34.3546	0.0273308	1256.99	0.148977	20.1735	0.23206
FBgn0037549	32.3603	0.0270609	1195.83	39.9884	37.7917	0.60174
FBgn0037431	76.84	0.0644327	1192.56	3.5623	0	0
FBgn0260223	35.1278	0.0336109	1045.13	158.42	1.49695	220.505
FBgn0028525	49.5516	0.067739	731.507	2.50137	0.382445	0
FBgn0265968	40.3123	0.0565204	713.234	70.8527	0.289814	78.0554
FBgn0261843	28.7486	0.0404882	710.048	1.92183	34.6052	45.2161
FBgn0027507	11.7482	0.016849	697.266	36.7176	62.6794	165.692
FBgn0029971	17.0176	0.0265898	640.006	372.974	36.5138	351.275
FBgn0266672	21.6288	0.0385535	561.008	42.0227	750.018	197.389
FBgn0023535	26.02	0.0489422	531.647	1.49331	20.9121	25.114
FBgn0260468	16.6419	0.031333	531.131	12.8852	71.2608	77.6796
FBgn0260759	23.7404	0.0448424	529.419	6.36161	104.439	67.2675
FBgn0037652	14.2785	0.0294015	485.637	35.3627	9.91253	6.68888
FBgn0033592	66.4949	0.137784	482.604	0	0	3.13902
FBgn0259725	37.1373	0.0787723	471.452	8.08889	0.0929389	0.118719
FBgn0036035	17.5109	0.0371583	471.252	16.6632	179.556	18.5928
FBgn0263656	61.35	0.130493	470.141	2.54536	0.092603	0
FBgn0040929	9.18671	0.0199509	460.467	5.51035	12.1923	15.7187
FBgn0263755	27.0834	0.0611955	442.571	3.67084	59.2338	68.0149
FBgn0036188	11.7834	0.0269037	437.984	73.2089	19.6957	20.7126
FBgn0262820	23.4711	0.0546242	429.682	9.71391	6.96462	0.492167
FBgn0034175	56.9549	0.133722	425.921	2.12667	0	0
FBgn0261840	25.3177	0.0600361	421.708	2.90513	35.586	42.6298
FBgn0053100	22.2736	0.0533459	417.532	288.048	346.967	17.7891
FBgn0039130	17.4907	0.042067	415.783	9.83584	22.0768	88.1353
FBgn0034649	43.4712	0.105083	413.685	1.19132	126.515	97.27
FBgn0022288	5.49499	0.0133963	410.187	13.4933	13.9867	27.5976
FBgn0037229	71.8499	0.185608	387.106	90.8665	6.42033	0
FBgn0035238	12.1865	0.0319737	381.143	22.821	42.7474	113.599
FBgn0041781	6.47215	0.0173994	371.975	91.5947	186.267	170.051
FBgn0038860	8.99567	0.0245685	366.146	9.75365	15.392	30.2495
FBgn0260392	29.0344	0.0796425	364.559	20.6201	1.07294	135.776
FBgn0038927	36.6817	0.103002	356.127	0.894984	48.8071	44.2785
FBgn0061360	54.9632	0.154845	354.957	3.49374	0.00215991	12.9309
FBgn0039165	7.924	0.0227604	348.149	15.6823	39.9092	36.0758
FBgn0054015	9.55302	0.0279947	341.243	17.0837	14.091	54.0621
FBgn0022985	6.6708	0.0203513	327.783	52.6154	104.605	107.974
FBgn0010258	33.1906	0.101465	327.113	1.10471	1.0447	77.7335
FBgn0036929	23.6308	0.0738986	319.774	26.5761	65.0737	1.92635
FBgn0016975	12.9225	0.0408635	316.236	140.606	589.995	429.566
FBgn0039929	9.46078	0.0302715	312.531	199.89	87.3898	66.0545
FBgn0039645	37.8442	0.124555	303.836	0.80325	0.720164	83.129
FBgn0027358	37.1491	0.123296	301.3	3.88026	0.387454	0.00165952
FBgn0029809	49.0527	0.163413	300.176	0.339519	31.7113	76.1412
FBgn0040009	35.1947	0.118243	297.646	0.198021	3.81617	20.1814
FBgn0035934	8.36602	0.0282216	296.44	4.25758	6.32961	12.8251
FBgn0000392	62.9958	0.221026	285.015	0	0.338028	1.60843
FBgn0029703	69.9642	0.247653	282.509	0	0.117429	8.89641
FBgn0060296	24.5541	0.0873045	281.247	19.4864	187.935	333.26
FBgn0053111	12.7871	0.0464564	275.25	13.9464	60.4204	52.1244
FBgn0053116	6.20069	0.0225953	274.425	36.9586	66.8869	75.807
FBgn0033960	6.69366	0.0245397	272.768	39.09	15.1857	28.4235
FBgn0003278	13.507	0.0496902	271.824	6.30624	42.746	7.01714
FBgn0053198	12.4231	0.0459808	270.181	15.0668	76.1719	40.2607
FBgn0051109	5.53542	0.0205376	269.526	36.5936	51.4404	74.3723
FBgn0015338	5.85962	0.0219165	267.362	73.8905	110.656	157.614
FBgn0037228	29.0734	0.112867	257.591	14.2074	26.2445	0.428177
FBgn0036920	5.32457	0.020757	256.519	49.5265	87.4914	84.0106
FBgn0038956	66.702	0.261637	254.941	5.75814	5.10277	0
FBgn0037324	19.106	0.0750413	254.607	6.97063	0.870575	0.784722
FBgn0035375	12.184	0.04804	253.622	13.9536	47.9099	53.8806
FBgn0265178	14.1733	0.0560849	252.712	75.6672	163.553	489.719
FBgn0030813	8.78502	0.0349003	251.717	3.40069	4.04327	11.1549
FBgn0025616	69.645	0.278009	250.513	0	7.00364	3.11365
FBgn0054025	69.5379	0.278078	250.066	7.34033	95.0931	0
FBgn0085346	22.0257	0.0883428	249.321	40.8431	5.75913	3.07358
FBgn0260430	79.9373	0.325718	245.419	0	1.57869	24.0002
FBgn0260775	16.2416	0.0664168	244.541	12.2532	71.4272	94.4897
FBgn0051634	20.6799	0.0853575	242.274	0.907063	14.8295	0.803537
FBgn0027866	8.703	0.0360894	241.151	62.7678	111.069	188.605
FBgn0035436	25.8822	0.109183	237.053	5.19464	81.7117	99.6
FBgn0262364	36.8354	0.155693	236.59	1.01654	180.407	9.79857
FBgn0031638	5.11451	0.0216253	236.506	20.3597	37.6831	32.7471
FBgn0032100	7.71926	0.0331383	232.941	59.1835	89.941	152.246
FBgn0033133	12.3462	0.0534336	231.056	47.8766	30.6269	9.44423
FBgn0032404	20.4609	0.0893017	229.121	53.5524	4.84924	77.3326
FBgn0046247	4.80239	0.0209859	228.839	109.709	135.488	204.165
FBgn0037322	77.7712	0.342427	227.118	0	8.61222	10.5156
FBgn0038769	7.88623	0.0347665	226.834	4.22879	4.47299	11.9762
FBgn0031189	5.98072	0.0265481	225.279	18.2406	42.9331	22.2992
FBgn0032721	11.9459	0.0538263	221.934	28.2451	45.9306	127.256
FBgn0052669	24.7288	0.111595	221.593	1.58776	55.9353	2.24374
FBgn0031227	8.98023	0.0405873	221.257	5.69769	12.4135	16.6894
FBgn0000449	69.107	0.322134	214.529	0	0.0285589	24.3265
FBgn0029525	6.11067	0.028621	213.503	10.1556	22.5602	15.7317
FBgn0083973	60.124	0.282982	212.465	2.77436	0	41.4088
FBgn0015520	9.46271	0.045029	210.147	33.7674	15.7215	76.5833
FBgn0031003	11.5152	0.0548571	209.913	4.49185	4.85364	18.6028
FBgn0033905	13.2699	0.0636055	208.629	21.6874	3.78565	40.5943
FBgn0037120	8.40082	0.0402805	208.558	95.0142	67.6055	30.5196
FBgn0030320	11.6633	0.0564373	206.659	23.7055	37.9684	106.955
FBgn0261838	30.0136	0.145651	206.066	1.17975	27.7752	24.1781
FBgn0033569	7.5318	0.0368447	204.42	6.88626	12.5751	17.5422
FBgn0260860	7.94911	0.0389808	203.924	30.5166	59.1615	79.8735
FBgn0263251	5.78335	0.0285749	202.393	56.0592	31.2537	30.5746
FBgn0000928	20.2591	0.101092	200.403	0.460039	0.563395	6.45102
FBgn0002909	19.7218	0.0988635	199.485	2.38421	17.946	24.8673
FBgn0039342	45.9076	0.230361	199.285	2.35916	0.0885207	0
FBgn0085482	24.5184	0.123923	197.852	1.72732	0.0619919	2.03917
FBgn0039565	27.7467	0.141163	196.558	21.7089	0.491097	28.5384
FBgn0037241	5.17089	0.0264679	195.365	22.5985	20.4775	42.5934
FBgn0030228	8.01619	0.0418071	191.743	19.5644	36.4605	52.7077
FBgn0264816	8.16581	0.0427805	190.877	11.3182	16.9637	33.4494
FBgn0032050	6.70447	0.0354475	189.138	8.27841	15.804	18.7457
FBgn0038110	6.33768	0.0338861	187.029	18.7719	38.8393	34.0282
FBgn0039966	8.19659	0.0440996	185.865	51.4848	112.598	129.465
FBgn0002899	9.48461	0.0510542	185.775	1.28199	0.608178	3.13822
FBgn0033844	5.98717	0.0324009	184.784	146.686	299.626	239.993
FBgn0038309	32.0605	0.173636	184.642	0.720192	38.6442	0.226104
FBgn0039561	5.93812	0.0321931	184.453	73.6356	123.994	150.631
FBgn0004648	6.65619	0.0361161	184.3	528.771	635.937	250.403
FBgn0030936	34.8842	0.190359	183.255	1.77517	0.4921	0
FBgn0261068	8.83732	0.0485564	182.001	16.5235	22.5359	51.4031
FBgn0024958	6.21894	0.0341702	181.999	50.9027	43.9968	23.1588
FBgn0003141	8.15699	0.0450245	181.168	33.0756	27.7045	87.2199
FBgn0032919	5.05527	0.02803	180.352	59.8388	83.7083	36.9796
FBgn0031194	6.46686	0.0359528	179.871	38.3373	69.1142	79.4276
FBgn0032922	11.5017	0.064226	179.082	23.1547	45.7222	92.444
FBgn0040514	26.3546	0.147204	179.034	0.656218	30.7262	3.83965
FBgn0033117	10.0458	0.0579145	173.459	24.9894	75.6911	69.5325
FBgn0030739	7.64096	0.0442822	172.551	8.4106	20.2619	17.477
FBgn0033032	5.81056	0.0338657	171.577	31.8658	42.7532	68.4112
FBgn0040089	42.3982	0.248126	170.874	0.304957	6.36361	61.9361
FBgn0032859	5.84102	0.0344824	169.391	38.3064	48.4011	82.9658
FBgn0265184	16.2186	0.0960771	168.808	3.7476	23.8348	18.8479
FBgn0037703	11.2334	0.0666508	168.541	21.0146	102.048	29.0328
FBgn0265101	6.70647	0.0398266	168.392	59.498	98.4004	130.703
FBgn0035000	10.5055	0.0624704	168.169	2.17289	9.31797	5.77252
FBgn0027081	4.7044	0.0279861	168.098	101.878	152.398	177.902
FBgn0033375	6.77974	0.040354	168.007	14.6435	25.023	34.7759
FBgn0030880	55.7934	0.33251	167.794	1.97405	0.296248	0
FBgn0030208	5.75884	0.0346394	166.251	99.9081	45.5544	110.384
FBgn0024912	21.4679	0.129813	165.376	16.9301	28.9355	1.41962
FBgn0030719	5.68806	0.0353331	160.984	259.304	370.066	537.336
FBgn0032515	6.46733	0.0402554	160.658	181.443	250.269	412.109
FBgn0266124	5.71372	0.0359876	158.769	95.4134	127.118	206.071
FBgn0037293	4.87152	0.0306853	158.757	25.0399	19.0166	40.1883
FBgn0039238	27.1205	0.172372	157.337	0.805739	1.15362	26.57
FBgn0038056	5.57272	0.0354656	157.131	39.413	56.6036	76.7442
FBgn0034104	48.2101	0.307347	156.859	0.238514	0	2.41952
FBgn0024371	6.16694	0.0397374	155.193	25.735	33.063	56.2025
FBgn0029689	8.19906	0.05284	155.168	23.2049	28.5884	66.7457
FBgn0038588	5.21807	0.0338339	154.226	12.5468	16.5332	25.143
FBgn0031142	32.5977	0.211986	153.773	1.34957	12.7096	88.7196
FBgn0051251	10.6936	0.0697105	153.4	11.3823	40.0734	6.3416
FBgn0001612	4.84892	0.0318424	152.279	19.2397	36.436	26.7363
FBgn0030976	6.53591	0.0431435	151.492	94.689	172.109	201.585
FBgn0037231	6.40135	0.0424159	150.919	157.684	195.407	362.366
FBgn0030695	7.89939	0.0524077	150.73	21.7989	13.8083	8.10477
FBgn0052537	8.24235	0.055098	149.594	10.5799	16.2701	31.0332
FBgn0026323	4.38853	0.0296218	148.152	35.9509	59.2907	55.6385
FBgn0030963	6.96851	0.0470724	148.038	9.9741	8.16482	3.9416
FBgn0032020	9.83456	0.06652	147.844	21.9	87.0644	50.2098
FBgn0029747	45.4877	0.308625	147.388	1.30393	0	0.729285
FBgn0036372	3.10865	0.021151	146.974	40.1206	49.6884	59.5988
FBgn0266195	45.6313	0.311252	146.606	18.2751	13.7931	0.0328316
FBgn0050503	17.7499	0.121476	146.118	32.2622	24.247	3.41171
FBgn0031256	7.54028	0.0518291	145.484	32.8492	48.5113	85.5775
FBgn0086445	8.3798	0.0576355	145.393	7.44873	10.5058	21.4168
FBgn0250819	16.986	0.116891	145.315	8.87098	67.2673	49.824
FBgn0263051	5.72093	0.0400183	142.958	81.129	34.8316	73.8043
FBgn0024364	7.10706	0.0497339	142.902	10.3677	12.315	26.0008
FBgn0039280	13.6365	0.0956233	142.606	3.9633	18.9907	13.32
FBgn0030970	9.97187	0.069977	142.502	13.6766	16.4288	48.2136
FBgn0033362	44.0829	0.31017	142.125	0	1.02839	0.0325856
FBgn0028741	26.3772	0.185721	142.026	3.43228	56.8547	62.7115
FBgn0037254	38.4925	0.272031	141.501	0.167184	1.49575	27.0469
FBgn0052850	9.11501	0.0646851	140.913	70.1584	78.09	237.375
FBgn0002783	3.98164	0.0287087	138.691	57.3133	75.2225	91.3634
FBgn0085279	13.7345	0.0993882	138.191	58.3619	8.36742	59.4374
FBgn0086856	6.26268	0.045641	137.216	16.3249	25.1967	36.2877
FBgn0039160	4.95476	0.0363398	136.345	32.4366	43.7077	59.3468
FBgn0031858	7.04951	0.0517158	136.313	47.9041	102.518	100.526
FBgn0015803	8.04778	0.0592531	135.82	27.5927	11.2982	41.4397
FBgn0033050	7.06096	0.0520687	135.609	36.9426	42.7503	92.7827
FBgn0033031	5.43673	0.0401034	135.568	294.571	368.541	157.068
FBgn0035101	3.77585	0.0279968	134.867	83.8787	62.8872	118.69
FBgn0052755	64.2828	0.484035	132.806	3.84388	0	0.0400645
FBgn0038262	19.7469	0.148934	132.588	3.16315	21.6288	29.2545
FBgn0003353	5.9739	0.0451227	132.392	76.2958	117.747	164.269
FBgn0010926	5.53486	0.0419195	132.035	8.01771	14.9647	14.6958
FBgn0032454	4.31471	0.0327293	131.83	32.1525	44.8936	58.0958
FBgn0259231	2.41717	0.0184069	131.319	14.3166	20.0344	14.5524
FBgn0027617	13.5157	0.103468	130.626	6.55559	8.86564	35.7188
FBgn0002023	3.15714	0.0241827	130.553	27.3572	28.0274	42.5475
FBgn0039930	16.7683	0.129131	129.856	51.3158	7.25881	8.11189
FBgn0003130	8.34352	0.0645203	129.316	4.43499	1.64479	5.60373
FBgn0259204	14.864	0.115565	128.62	53.7735	8.06937	107.599
FBgn0037536	6.55803	0.0510656	128.423	98.7208	154.037	232.555
FBgn0036039	3.658	0.0285453	128.147	45.0446	53.6762	72.1194
FBgn0034372	35.8326	0.279735	128.095	1.2719	91.7047	92.1324
FBgn0000482	6.60696	0.0518732	127.367	19.1336	25.7244	44.8502
FBgn0000056	43.5915	0.343276	126.987	6.7204	1451.2	1.62496
FBgn0004957	11.3895	0.0898052	126.825	10.1958	49.3266	10.8381
FBgn0027607	3.83796	0.0302686	126.797	35.3722	41.8098	58.2216
FBgn0058439	12.9986	0.102852	126.382	66.6419	341.968	256.779
FBgn0260233	28.7649	0.22777	126.289	44.6216	1.05996	0.54618
FBgn0286507	30.6799	0.244689	125.383	0.417044	40.4047	0.704909
FBgn0002626	10.0531	0.0804704	124.929	524.682	1426.96	1521.72
FBgn0028974	8.03754	0.0645772	124.464	6.43861	3.02687	11.5474
FBgn0267790	5.11973	0.0411653	124.37	111.467	81.5538	193.998
FBgn0034262	17.6656	0.142222	124.212	16.9164	1.47831	10.637
FBgn0025642	41.5678	0.334856	124.136	0.530354	0	1.68115
FBgn0037031	9.37766	0.0756642	123.938	45.6668	90.1416	19.0426
FBgn0032800	4.41829	0.0356604	123.899	76.7773	113.72	126.457
FBgn0033459	23.1777	0.187328	123.727	0.956707	9.3534	12.3986
FBgn0264426	51.2046	0.414591	123.506	1.55304	0	0.229889
FBgn0004841	3.745	0.0304038	123.175	14.107	18.8234	23.12
FBgn0026576	6.92096	0.0563192	122.888	30.3403	58.8285	68.7889
FBgn0039229	4.5162	0.0371347	121.617	227.443	400.504	333.071
FBgn0035272	9.69216	0.0797098	121.593	35.9299	140.188	32.5334
FBgn0033504	5.78815	0.0476125	121.568	36.2068	17.0445	48.0062
FBgn0029656	12.6579	0.10428	121.384	1.24508	0.353725	0.240232
FBgn0001992	14.6165	0.120681	121.117	1.30266	5.53348	0.496308
FBgn0033891	6.32219	0.0522594	120.977	19.9244	23.8802	46.6021
FBgn0004583	14.1901	0.117471	120.797	0.619524	3.02872	2.98572
FBgn0030326	29.6457	0.246634	120.201	0.59004	7.2748	22.2309
FBgn0029745	24.2186	0.202293	119.721	1.09944	0.0270458	0.588275
FBgn0033019	4.0579	0.033983	119.41	40.5222	32.8984	65.2012
FBgn0030877	9.19413	0.0773941	118.796	7.63332	23.4403	15.788
FBgn0003495	9.24954	0.0780416	118.521	15.6801	3.69725	14.0494
FBgn0028740	18.7916	0.159133	118.088	0.573822	0.985136	7.01922
FBgn0036031	29.4549	0.249659	117.981	4.18381	0.117705	6.8149
FBgn0033357	10.9664	0.0936266	117.129	468.544	227.173	109.78
FBgn0264672	2.5196	0.0215472	116.934	11.7345	16.4317	14.4689
FBgn0042102	57.2949	0.492187	116.409	0	0	2.78467
FBgn0032940	4.47656	0.0385981	115.979	42.2533	74.2621	68.8875
FBgn0052699	5.98455	0.0517385	115.669	48.1208	84.0438	97.9019
FBgn0037689	47.9963	0.415094	115.627	0.744746	75.3573	116.29
FBgn0033609	6.50863	0.0565999	114.994	59.5402	83.6271	137.735
FBgn0040080	2.88404	0.025101	114.897	32.3954	39.0867	47.0575
FBgn0066304	43.2417	0.378559	114.227	4.78664	1.98163	0.00622411
FBgn0053995	32.1656	0.281611	114.22	15.8515	0.210584	46.5681
FBgn0267398	8.46688	0.0742487	114.034	184.321	145.345	510.986
FBgn0034442	13.7847	0.121099	113.831	7.66425	50.0592	10.7596
FBgn0037232	3.97357	0.0349478	113.7	22.2011	21.1815	36.9997
FBgn0039830	6.74716	0.0596231	113.164	1597.19	2927.63	3581.18
FBgn0264477	49.0194	0.433235	113.147	0.980409	0	1.13494
FBgn0039167	9.21455	0.0815325	113.017	1.2032	0.32007	0.668039
FBgn0039691	5.60468	0.0496473	112.89	16.5415	26.7442	33.4316
FBgn0052190	5.02602	0.0445422	112.837	120.16	159.631	233.141
FBgn0024987	7.77964	0.0692673	112.313	125.914	220.325	335.402
FBgn0263132	9.9718	0.0890389	111.994	4.40712	5.14406	1.204
FBgn0259175	4.64005	0.0415413	111.697	45.4748	47.3309	85.3533
FBgn0025111	12.2584	0.109984	111.457	3.02172	3.82762	0.935791
FBgn0021742	22.6202	0.202958	111.452	0.836733	0.248242	9.10589
FBgn0026393	10.734	0.0965981	111.12	12.3943	50.7475	23.6824
FBgn0036090	7.5685	0.0681482	111.059	34.8533	46.6832	90.9835
FBgn0260003	19.8799	0.179418	110.802	31.436	36.9374	2.30855
FBgn0051161	39.6274	0.359417	110.255	7.47801	4.79015	0.047539
FBgn0030892	7.51171	0.0687842	109.207	52.7246	32.9379	21.6673
FBgn0051627	16.3402	0.149869	109.03	11.7087	2.19764	32.4035
FBgn0034070	16.6605	0.152838	109.007	82.5447	11.7652	94.5176
FBgn0266668	5.21966	0.0479052	108.958	30.4975	50.3688	55.2925
FBgn0030012	7.68825	0.0705632	108.956	8.99128	15.1934	24.936
FBgn0038397	25.4987	0.234031	108.954	0.898174	0.176359	18.5217
FBgn0037240	7.75667	0.0712457	108.872	21.9386	26.6519	60.1665
FBgn0086906	30.8303	0.283204	108.863	0.145564	0.162056	7.76709
FBgn0003380	12.6924	0.117377	108.133	345.438	55.0088	448.278
FBgn0020388	7.14208	0.0660735	108.093	36.2472	75.9354	84.41
FBgn0035524	5.98303	0.0554717	107.857	18.1537	25.3403	39.4683
FBgn0038469	50.8264	0.471519	107.793	0	0	1.10121
FBgn0032473	26.4517	0.246235	107.424	2.5107	0.164108	0.194045
FBgn0000239	5.1232	0.047775	107.236	49.7505	75.0406	94.1878
FBgn0004858	5.39357	0.0503899	107.037	30.6025	34.0833	60.5973
FBgn0038320	3.98385	0.0372243	107.023	33.3857	48.4668	53.7378
FBgn0031144	10.7233	0.100242	106.974	6.14292	8.38541	26.3719
FBgn0266410	12.3534	0.116192	106.319	77.6781	245.897	334.293
FBgn0003449	7.54947	0.0716091	105.426	92.1212	82.4439	33.096
FBgn0035953	4.12244	0.039237	105.065	26.1942	35.6162	43.7597
FBgn0034997	8.883	0.0847488	104.816	19.023	50.9813	46.5689
FBgn0036199	5.87526	0.0561016	104.725	26.4214	37.1928	55.5565
FBgn0250911	15.0639	0.144471	104.269	58.2181	42.8202	7.20634
FBgn0039943	3.73408	0.036049	103.584	52.8098	66.6302	35.9379
FBgn0032979	4.2976	0.0415373	103.464	69.523	81.6491	122.889
FBgn0037150	15.732	0.152262	103.322	14.0151	48.4807	3.40837
FBgn0031395	3.32635	0.032252	103.136	36.8403	54.2943	50.1415
FBgn0034186	6.03968	0.0586673	102.948	7.56539	11.2694	4.18823
FBgn0033087	5.80652	0.0566688	102.464	26.9172	36.4806	56.006
FBgn0010607	6.0056	0.0586766	102.351	19.8449	18.0962	42.317
FBgn0030328	3.91946	0.0384893	101.833	86.7121	140.028	123.303
FBgn0035073	14.126	0.140423	100.596	15.4073	2.21859	15.4524
FBgn0024491	11.8161	0.11758	100.494	11.2857	44.432	44.5594
FBgn0025578	57.8933	0.577272	100.288	0	0	7.67519
FBgn0031184	16.7649	0.167168	100.288	6.27354	39.3655	31.1417
FBgn0264002	7.14708	0.0716285	99.7798	10.0424	11.1114	25.8803
FBgn0025592	5.09606	0.0510922	99.7424	53.5449	79.5304	94.7042
FBgn0039730	4.49033	0.0451416	99.4722	81.6886	102.229	145.474
FBgn0085243	36.4042	0.367243	99.1283	0.544613	1.66341	0
FBgn0011573	4.77223	0.0481462	99.1195	68.0886	70.5673	126.151
FBgn0032988	8.46281	0.0858146	98.6173	56.6084	57.5635	169.588
FBgn0027786	6.41183	0.0650769	98.527	129.94	68.1345	205.259
FBgn0039136	5.46184	0.0554751	98.4557	35.9711	17.6512	40.7366
FBgn0005778	37.3745	0.379948	98.3677	2.09004	0.624221	0.033547
FBgn0250843	3.99873	0.0408477	97.8936	49.0457	64.0699	82.1993
FBgn0029893	5.27184	0.0539089	97.7917	36.4512	56.8557	67.3439
FBgn0033757	4.62559	0.047374	97.6398	10.8227	12.0909	20.4808
FBgn0051719	8.83018	0.0907382	97.315	6.88271	13.8743	21.015
FBgn0024889	2.72499	0.0281162	96.9189	88.2966	65.2441	63.2134
FBgn0034271	3.03073	0.0313195	96.768	27.1581	35.5275	38.9867
FBgn0038429	5.7439	0.0593811	96.7295	13.2657	23.0977	26.3223
FBgn0259243	6.45359	0.0669438	96.4031	152.782	227.714	359.523
FBgn0051368	4.44259	0.0462083	96.1427	15.8406	30.1582	18.3497
FBgn0000617	7.92877	0.0825067	96.0985	15.0375	22.7692	41.3882
FBgn0036685	5.66048	0.0589065	96.0927	57.8304	67.3268	121.373
FBgn0038468	56.5097	0.588541	96.0166	0	0	2.09004
FBgn0032047	12.7494	0.132906	95.9277	5.06386	9.37543	1.28386
FBgn0003559	4.8323	0.0505024	95.6846	33.0981	34.1006	61.5114
FBgn0014092	7.71778	0.0808566	95.4503	22.5542	21.8765	55.9927
FBgn0261789	6.28936	0.0661436	95.0864	76.064	33.543	46.9142
FBgn0037297	8.13174	0.0856118	94.984	39.3946	34.5408	106.576
FBgn0029840	3.50741	0.0369433	94.9403	19.9422	24.4439	30.5989
FBgn0032582	14.6161	0.15457	94.56	0.767664	6.61954	0.615905
FBgn0030995	8.76157	0.0927083	94.5069	3.97791	6.67644	12.0021
FBgn0002905	15.5266	0.165965	93.5533	2.84353	0.43169	3.77091
FBgn0035437	3.32937	0.035633	93.4351	45.9004	63.2674	65.7654
FBgn0033000	4.59473	0.0491766	93.4333	136.106	150.096	257.784
FBgn0039612	17.5139	0.188459	92.932	1.1785	2.11505	12.1489
FBgn0010399	3.70349	0.0399543	92.6931	101.777	105.22	163.112
FBgn0034978	4.38072	0.0473547	92.5088	271.997	406.627	443
FBgn0030391	5.43476	0.0587787	92.4614	33.734	58.2275	58.7922
FBgn0050356	34.1222	0.369618	92.3173	2.77563	0.0295927	10.1344
FBgn0027539	3.02905	0.0328279	92.2707	22.7298	32.3584	18.8739
FBgn0030122	5.79593	0.0628608	92.2026	13.1218	24.7058	22.1503
FBgn0044324	5.75542	0.0629511	91.4269	40.6093	60.6386	82.3582
FBgn0014464	40.6768	0.444914	91.4262	3.97311	0	0.497829
FBgn0038371	14.842	0.162671	91.2396	2.80068	2.01893	16.9106
FBgn0038768	4.6867	0.0514257	91.1355	18.6929	25.2798	33.1314
FBgn0004179	6.45543	0.0710923	90.8035	208.948	345.176	446.752
FBgn0263973	21.9534	0.242462	90.5435	0.493353	0.540147	7.89397
FBgn0053512	3.9948	0.0442908	90.1948	121.935	186.211	192.874
FBgn0261446	17.4167	0.193807	89.8661	1.68355	2.70359	16.6031
FBgn0261015	17.5907	0.195773	89.8526	19.727	15.8159	173.561
FBgn0039907	8.99909	0.10026	89.7572	75.249	136.863	236.647
FBgn0052808	10.5146	0.117289	89.6467	11.8077	45.2172	36.0579
FBgn0036837	4.25499	0.0475218	89.5376	142.964	121.076	83.5599
FBgn0037613	7.3498	0.082165	89.4517	20.2441	58.9223	38.6273
FBgn0015331	6.2923	0.0703776	89.4078	23.7552	24.2379	54.0934
FBgn0038365	13.2968	0.148724	89.406	2.31602	6.84183	13.5994
FBgn0039710	4.94391	0.0554191	89.2095	27.7702	38.667	50.7807
FBgn0031604	5.81304	0.0662612	87.7292	17.7091	34.0975	33.3072
FBgn0040687	71.9184	0.820451	87.6571	0	5.46357	6.71039
FBgn0033769	2.17929	0.0248719	87.6206	45.7987	66.8159	49.4589
FBgn0031004	26.2923	0.300371	87.5329	0.262812	0.182649	6.84331
FBgn0032222	3.20795	0.0366782	87.4621	106.759	140.138	158.639
FBgn0028542	24.3413	0.278625	87.3621	7.99261	14.375	0.476739
FBgn0033713	3.67003	0.0421006	87.173	27.164	36.9357	42.2263
FBgn0264962	7.37223	0.0847869	86.9501	178.221	70.7799	99.3204
FBgn0261983	6.25269	0.0720047	86.8372	24.8469	41.4447	54.146
FBgn0027088	3.08007	0.0354868	86.7949	31.0371	47.7448	30.5048
FBgn0025693	25.2	0.2904	86.7771	8.47096	1.56275	0.308484
FBgn0250903	59.4935	0.685811	86.7491	17.6011	38.4738	0.00736109
FBgn0010774	5.20883	0.0600529	86.7374	140.335	180.797	276.925
FBgn0030797	13.9073	0.160419	86.6935	1.06534	7.23349	4.56426
FBgn0261086	3.52756	0.0406905	86.6926	57.9769	51.657	88.0859
FBgn0283510	5.15383	0.0595079	86.6075	65.8164	133.462	61.411
FBgn0036091	17.9064	0.206846	86.5687	5.69117	11.9315	60.1706
FBgn0038211	20.5471	0.237494	86.5164	34.4995	4.18708	3.53945
FBgn0063649	4.99144	0.0577152	86.4841	36.7215	57.1598	64.4079
FBgn0053172	8.78021	0.101562	86.4514	2.27568	4.41303	6.79901
FBgn0033081	4.99293	0.057851	86.3067	32.5551	26.7037	16.1229
FBgn0051999	14.281	0.165747	86.1611	39.4442	6.13579	66.0469
FBgn0000316	5.94286	0.0689833	86.1492	49.3988	24.9997	28.2522
FBgn0032034	25.4532	0.295892	86.0217	18.9395	25.9981	0.876743
FBgn0039419	7.12101	0.0828654	85.9347	13.3213	33.0612	28.144
FBgn0030669	6.90984	0.0806658	85.6602	105.683	95.3871	43.0274
FBgn0030688	23.2569	0.272152	85.4557	0.208858	1.11859	4.40208
FBgn0033542	18.0929	0.211773	85.4356	14.422	4.33492	1.30473
FBgn0031045	21.7154	0.25635	84.7098	1.72955	43.2395	1.57815
FBgn0040252	30.8735	0.364917	84.604	0.366243	17.1557	5.04957
FBgn0027589	4.05512	0.0479642	84.5447	53.042	90.434	80.372
FBgn0034856	54.45	0.644091	84.5377	6.44659	5.37788	0
FBgn0030468	5.33038	0.0630638	84.5236	31.7916	43.6748	65.1257
FBgn0034005	32.3338	0.382895	84.4456	0.172797	7.07634	0.0234504
FBgn0021768	5.35675	0.063553	84.2878	25.6321	31.379	53.1132
FBgn0000826	12.4687	0.148009	84.2429	1.77217	11.3322	6.07956
FBgn0053095	9.63451	0.114744	83.9652	26.0041	9.28477	33.4608
FBgn0033657	1.92009	0.0228706	83.9548	61.054	70.3613	78.5829
FBgn0033524	24.0916	0.287874	83.688	1.31264	1.66433	29.0498
FBgn0030685	1.83471	0.0219744	83.4929	60.5901	85.8453	67.9363
FBgn0011737	2.79159	0.033492	83.351	89.37	130.99	85.8153
FBgn0035578	13.3681	0.160455	83.3137	43.2668	8.20145	9.52833
FBgn0034486	24.3746	0.292594	83.3053	4.91949	144.898	5.576
FBgn0023522	2.88304	0.0347539	82.9558	23.4854	32.8564	32.0103
FBgn0015829	4.68467	0.0564946	82.9225	38.8314	76.1656	41.3689
FBgn0032671	2.25229	0.0271816	82.8607	8.42221	6.78092	11.0339
FBgn0041205	5.07188	0.0612794	82.7666	62.9684	82.1102	125.012
FBgn0037581	30.1181	0.363922	82.7598	3.48937	0.0846819	2.954
FBgn0035772	4.31056	0.0521743	82.6184	86.067	78.7626	48.528
FBgn0038746	8.89726	0.108076	82.3239	11.2085	30.0346	24.8952
FBgn0284257	4.86634	0.0591732	82.2389	125.381	168.462	237.946
FBgn0030091	3.6572	0.044648	81.9118	23.3927	32.4481	37.3403
FBgn0031908	8.41707	0.103083	81.6534	3.34814	12.9338	4.12045
FBgn0050183	7.47768	0.0919661	81.3091	4.34508	12.8991	5.58386
FBgn0035254	5.92275	0.0729109	81.2327	17.5306	14.9369	35.2418
FBgn0035199	31.0788	0.382845	81.1786	1.59638	0.160264	0.0585101
FBgn0063485	6.25264	0.0770235	81.1783	9.72448	17.7371	21.869
FBgn0261053	10.697	0.132083	80.9868	0.293981	1.41272	0.620271
FBgn0031283	66.7426	0.82459	80.9403	0	8.98857	1.35132
FBgn0026417	11.1395	0.137819	80.8266	3.98832	4.87807	16.9619
FBgn0058191	5.78509	0.071895	80.4657	57.1428	59.329	124.158
FBgn0032986	7.9778	0.0991546	80.4582	116.147	90.0729	41.2906
FBgn0034054	4.97818	0.0620046	80.2872	17.361	34.7796	24.3683
FBgn0086370	4.04574	0.0504914	80.1274	146.668	186.539	253.342
FBgn0035267	4.57297	0.0570868	80.1056	68.5439	89.7622	125.314
FBgn0040078	6.24327	0.0781597	79.8783	18.6504	21.9247	41.6971
FBgn0014073	16.5703	0.207692	79.7833	0.372857	0.716122	3.95461
FBgn0259202	53.0965	0.665513	79.7828	89.9923	0.31449	0.0932654
FBgn0013323	22.3111	0.27985	79.725	1.97825	0.164338	0.14304
FBgn0033486	3.78897	0.0476287	79.5522	46.7281	57.3626	77.1197
FBgn0052177	3.80797	0.0479	79.4983	119.641	150.162	188.884
FBgn0039712	2.31034	0.029063	79.4942	51.3655	65.0915	42.8463
FBgn0283473	6.71757	0.0846078	79.3966	43.3456	88.6276	91.6795
FBgn0038576	7.89649	0.0994588	79.3946	23.0584	16.6251	7.90813
FBgn0064117	24.8877	0.313614	79.3577	17.1324	0.994447	143.958
FBgn0035111	4.68133	0.0589977	79.3477	27.1012	48.4625	44.624
FBgn0032849	7.53144	0.0949986	79.2795	22.0508	30.5344	63.143
FBgn0032429	4.09057	0.0516294	79.2296	70.8362	110.284	58.3346
FBgn0039056	3.37556	0.0426327	79.1777	40.2809	54.625	60.4168
FBgn0038871	6.84234	0.0864275	79.1686	19.7468	33.8292	47.9321
FBgn0029755	5.27011	0.0666966	79.0163	15.7209	24.0478	28.9447
FBgn0039006	9.7135	0.123042	78.9447	3.56639	9.86525	9.82976
FBgn0038369	7.80403	0.0988742	78.9289	77.5197	26.7254	74.0422
FBgn0035109	9.9175	0.126191	78.5911	13.3184	40.7626	33.9417
FBgn0005322	3.95456	0.05043	78.4169	60.8936	70.9596	98.9923
FBgn0051064	4.64249	0.0592325	78.3774	96.1328	102.931	178.291
FBgn0051646	7.66412	0.0978165	78.3521	69.3964	34.0913	120.178
FBgn0031053	20.6639	0.263963	78.2833	1.33384	0.162776	0.114759
FBgn0033692	6.36804	0.0818622	77.7897	13.0727	32.5062	22.0842
FBgn0035558	3.07984	0.0395928	77.7878	69.6633	97.9897	106.124
FBgn0031304	5.11251	0.0660884	77.3587	42.1803	58.289	81.6643
FBgn0001986	4.70364	0.0608571	77.29	14.2177	13.9414	7.52084
FBgn0030421	9.08772	0.11758	77.29	21.8108	44.4933	65.7823
FBgn0030631	7.47487	0.0967195	77.284	15.3097	26.8792	38.2694
FBgn0031606	7.06127	0.0924048	76.4167	8.1449	18.6496	16.5559
FBgn0035286	12.7082	0.166472	76.3385	2.24392	0.437585	3.43131
FBgn0032258	4.98632	0.0653333	76.3212	26.7102	37.0793	52.9688
FBgn0030776	12.9369	0.169637	76.2625	1.85837	11.3402	1.30252
FBgn0053137	32.2745	0.423562	76.198	1.44197	5.12111	0.0667108
FBgn0264743	8.74326	0.114975	76.0451	70.5927	177.355	193.03
FBgn0015790	2.62211	0.0345578	75.8763	250.061	337.211	319.985
FBgn0030738	4.02305	0.0531383	75.709	28.6124	26.7377	47.015
FBgn0039089	2.85879	0.0378038	75.6219	93.5221	136.499	119.234
FBgn0032925	5.68525	0.075292	75.5094	12.8971	21.3098	24.4721
FBgn0035041	5.69515	0.0756339	75.2989	70.9109	101.376	149.194
FBgn0031245	7.83531	0.10407	75.2892	180.3	397.563	406.567
FBgn0051922	5.54682	0.0737634	75.1974	17.5832	28.6443	11.8246
FBgn0033405	13.1671	0.175788	74.9033	15.9537	16.3677	116.735
FBgn0037182	2.78382	0.0371753	74.8836	39.9177	60.7531	42.5606
FBgn0003295	9.20021	0.123056	74.7644	10.9034	25.4149	35.9245
FBgn0030087	3.75007	0.0501679	74.7503	77.6616	106.215	122.043
FBgn0039881	37.3861	0.500887	74.6399	2.71167	0.329033	0.042836
FBgn0038325	2.88898	0.0388294	74.402	29.817	42.0324	40.9014
FBgn0031309	4.2675	0.0573854	74.3655	7.09883	8.85106	12.8157
FBgn0035249	5.65983	0.0761342	74.3401	13.2157	21.97	26.2263
FBgn0261064	5.39235	0.0728396	74.0304	19.8631	26.6571	40.3012
FBgn0035909	2.04379	0.0276631	73.8816	44.8552	45.9849	58.889
FBgn0033885	21.9576	0.297638	73.7729	9.57666	72.7314	128.192
FBgn0013720	5.37067	0.0728487	73.7237	16.3512	26.1559	30.9906
FBgn0001206	6.16603	0.0836815	73.6845	7.18273	10.758	15.9555
FBgn0030027	21.2928	0.289938	73.4392	0.139784	1.30501	1.49538
FBgn0053144	4.78679	0.065239	73.373	77.8168	96.3734	145.743
FBgn0265784	6.7199	0.0920326	73.0165	45.5584	22.3942	71.0163
FBgn0264744	11.8063	0.16184	72.9502	5.79376	29.7947	17.5846
FBgn0033450	4.63757	0.0635982	72.9198	4.05525	4.87811	2.12679
FBgn0051712	4.50641	0.0619411	72.7531	333.629	548.135	512.787
FBgn0083962	6.66567	0.0917491	72.6511	58.8047	118.518	130.31
FBgn0030634	5.02555	0.0691819	72.6425	64.8517	96.0295	120.325
FBgn0029800	7.60658	0.104817	72.5702	36.1951	97.2521	75.2087
FBgn0030196	18.1835	0.250716	72.5263	14.5993	149.437	54.9491
FBgn0030293	4.20373	0.0580264	72.4451	34.5209	51.9569	52.9281
FBgn0027558	5.80216	0.080322	72.2362	19.4131	28.4912	40.258
FBgn0037670	4.99318	0.0692457	72.1081	17.5541	17.8217	32.8621
FBgn0266720	2.28869	0.0317807	72.0153	85.8664	107.008	111.207
FBgn0028837	4.7014	0.0653125	71.9832	34.8364	46.7033	61.4796
FBgn0037174	12.709	0.177149	71.7418	1.15314	1.89358	0.170434
FBgn0264897	49.5275	0.690488	71.7282	7.54644	0	0.855974
FBgn0283472	3.49183	0.0487415	71.6398	42.9584	25.86	29.5304
FBgn0010812	4.76064	0.066506	71.5822	20.3191	11.515	12.5357
FBgn0013342	5.2581	0.0735437	71.4962	1045.36	1746.53	1868.71
FBgn0015602	3.49477	0.0490086	71.3094	63.8316	89.9554	101.017
FBgn0028507	5.27988	0.0741428	71.2124	71.0823	137.473	132.28
FBgn0033015	3.43528	0.0482524	71.1939	80.241	76.7137	125.031
FBgn0267976	4.58341	0.0644488	71.117	177.028	288.523	302.867
FBgn0030000	4.10775	0.058066	70.7428	9.77745	15.7372	15.095
FBgn0261801	3.1959	0.0453164	70.5243	5.81181	9.40795	7.39858
FBgn0051897	27.2315	0.387133	70.3415	2.55114	4.41479	0.11768
FBgn0260655	3.73843	0.0532535	70.2008	28.6604	35.1087	48.2599
FBgn0027093	4.95456	0.0706436	70.1346	14.6257	24.8426	23.504
FBgn0032924	4.55988	0.06506	70.0873	38.1313	40.4529	70.1293
FBgn0014023	5.02662	0.0720534	69.7625	76.5723	91.2885	147.813
FBgn0035414	10.6701	0.152951	69.7616	5.43055	7.54503	24.2973
FBgn0037647	4.1892	0.0600597	69.7507	39.4973	57.2279	64.7074
FBgn0032415	32.9278	0.473713	69.5102	1.60436	1.70241	0.0481699
FBgn0260390	22.8302	0.328462	69.5063	1.64153	23.668	13.6675
FBgn0083991	9.01914	0.129957	69.4011	68.2135	18.5871	61.8309
FBgn0260760	6.33861	0.0916451	69.1648	73.9884	31.0512	48.3835
FBgn0031005	2.80953	0.0406224	69.1621	34.9832	38.2648	51.6583
FBgn0030346	5.97556	0.0865242	69.0622	51.9668	101.922	97.1368
FBgn0034242	3.05138	0.0442278	68.9923	66.1746	42.0821	46.5133
FBgn0085339	6.81591	0.0988318	68.9647	36.7698	50.1836	84.4022
FBgn0031493	4.14732	0.0601776	68.9179	34.1097	50.4235	55.9893
FBgn0033610	25.4782	0.370003	68.8595	0.684376	2.12649	23.2862
FBgn0036836	23.4435	0.341622	68.624	6.88891	0.411562	30.6516
FBgn0026679	6.1527	0.0902449	68.1778	12.0885	12.0682	27.0253
FBgn0037084	2.9252	0.0429353	68.1304	219.954	309.889	299.385
FBgn0030066	6.54956	0.0962291	68.0622	16.1307	22.3978	41.8318
FBgn0010317	31.7901	0.467197	68.0442	7.13302	3.70986	0.134335
FBgn0039848	17.5695	0.258715	67.9105	2.45677	26.5369	8.28041
FBgn0005666	21.8821	0.322309	67.8917	0.322547	0.262986	6.02235
FBgn0032974	6.79315	0.100222	67.7813	24.85	52.6163	54.3817
FBgn0030582	4.62401	0.0683102	67.6913	46.8546	61.1895	82.4466
FBgn0035245	8.82763	0.130652	67.566	52.1903	51.4684	164.191
FBgn0030787	7.77914	0.115156	67.5533	36.4665	27.9748	12.9709
FBgn0024362	2.77359	0.041072	67.53	41.5931	62.324	43.9423
FBgn0033178	5.31906	0.0791369	67.2134	28.3245	18.2044	45.0232
FBgn0263655	51.508	0.766604	67.1898	1.02589	0	0
FBgn0034642	13.3313	0.198415	67.1891	1.19351	5.10589	5.76983
FBgn0039870	5.28461	0.0786822	67.1641	20.2408	14.417	10.4955
FBgn0039404	6.16828	0.092021	67.0312	19.1936	33.2851	37.7224
FBgn0032247	8.06292	0.120374	66.9825	10.9382	17.3867	33.0351
FBgn0037612	18.7294	0.279656	66.9731	7.32019	35.5583	66.0345
FBgn0026196	4.8719	0.0728554	66.8709	10.8654	12.8139	21.1083
FBgn0259481	4.06675	0.0608589	66.8226	114.676	194.253	178.142
FBgn0264357	6.92422	0.104003	66.5774	85.0457	61.0611	200.613
FBgn0029814	1.6021	0.0240867	66.5137	443.661	595.759	487.639
FBgn0030505	6.53268	0.0987537	66.1513	62.3148	29.8394	30.1187
FBgn0015270	25.318	0.3835	66.0182	0.52308	25.2516	2.17941
FBgn0031099	7.60092	0.115489	65.8149	91.9208	132.662	37.837
FBgn0032724	5.14182	0.0781502	65.794	23.1753	11.8604	27.8767
FBgn0032913	39.3118	0.599963	65.5237	0.0306633	9.11008	0.0666317
FBgn0001084	7.15031	0.109151	65.5083	7.65471	11.0804	3.41712
FBgn0026582	9.15243	0.139949	65.3984	20.8846	34.8805	70.0366
FBgn0086908	3.49907	0.0535517	65.3399	20.3332	13.0303	14.5046
FBgn0030752	4.37483	0.0672117	65.0903	97.8089	112.931	170.331
FBgn0035401	7.05887	0.108463	65.0812	22.4434	33.9052	51.995
FBgn0033221	41.1065	0.632948	64.9445	5.01027	7.16064	0.0846248
FBgn0052062	5.78758	0.0891351	64.9304	269.563	110.218	217.661
FBgn0032851	29.5425	0.455052	64.9213	0.413926	2.29368	0.00750255
FBgn0037722	11.2393	0.1737	64.7049	9.73646	8.39787	39.5287
FBgn0032154	5.64566	0.0873089	64.6631	1.75384	2.74339	3.90149
FBgn0038140	7.32045	0.113489	64.5035	7.58862	13.5952	19.1339
FBgn0038425	5.55774	0.0862671	64.4248	24.4526	10.7843	25.2969
FBgn0001150	7.22747	0.112218	64.4054	23.1053	55.4811	21.4721
FBgn0030005	16.9989	0.264459	64.2779	0.905821	2.86877	7.94898
FBgn0030407	9.15992	0.143226	63.9544	6.1184	14.2582	18.817
FBgn0011771	4.21819	0.066027	63.8858	33.1905	46.7678	55.1719
FBgn0051546	18.9888	0.29799	63.7229	0.304691	3.59051	1.21251
FBgn0040609	24.2778	0.38152	63.6343	27.4421	50.9974	1.73193
FBgn0041712	6.8727	0.108014	63.6282	10.131	6.43532	4.1055
FBgn0039115	4.34492	0.0683104	63.6056	28.9621	23.3588	16.57
FBgn0033808	7.18083	0.112941	63.5806	19.1357	32.4279	44.1755
FBgn0034634	9.5786	0.15066	63.5776	9.71512	39.0212	18.9815
FBgn0033188	5.24918	0.0825939	63.5541	269.657	532.272	450.969
FBgn0265052	36.7297	0.578121	63.533	72.6124	0.357196	23.5047
FBgn0023518	3.99262	0.0629	63.4757	19.4753	24.7746	32.0151
FBgn0040786	10.9815	0.17372	63.2136	10.3836	5.77023	2.42828
FBgn0044823	6.39509	0.101217	63.1819	16.432	20.5417	36.7068
FBgn0002709	16.2224	0.257059	63.1076	0.7281	2.3233	6.08832
FBgn0034033	9.55694	0.151555	63.0594	18.0134	18.0297	5.36523
FBgn0051961	5.78099	0.0918588	62.9335	46.1933	68.465	108.664
FBgn0031848	24.5495	0.390639	62.8445	0.433523	6.49582	6.38121
FBgn0259704	8.90975	0.14191	62.7846	15.4656	26.0817	48.4188
FBgn0259990	29.631	0.472969	62.649	0.281227	13.6445	7.20685
FBgn0035816	8.06438	0.128733	62.6441	134.323	49.3288	69.2477
FBgn0003411	53.8598	0.859927	62.633	0	0.0744158	7.08624
FBgn0030691	20.4041	0.325918	62.6052	0.629116	0.0948856	4.13535
FBgn0260229	23.7351	0.37967	62.5152	11.0384	0.33093	1.49087
FBgn0030659	5.86114	0.0937719	62.5042	13.8863	14.8588	28.6246
FBgn0040071	5.36954	0.0860251	62.4182	42.6478	50.7519	83.5153
FBgn0052803	4.83772	0.077642	62.3081	11.92	14.3094	22.8007
FBgn0031294	2.82545	0.0453507	62.3024	2302.47	2045.5	3533.3
FBgn0052163	9.83221	0.158255	62.1287	19.2138	67.5447	27.9296
FBgn0015905	8.77139	0.141187	62.1259	5.79514	7.75702	18.603
FBgn0037249	5.07951	0.0817801	62.1118	117.066	228.835	174.429
FBgn0050338	8.15285	0.131337	62.0757	5.98487	2.27862	9.30324
FBgn0030160	16.6662	0.269657	61.8054	76.2227	467.467	450.765
FBgn0005411	3.05908	0.0496032	61.671	95.9192	107.621	145.928
FBgn0010222	7.61032	0.123435	61.6543	21.9371	57.932	17.7929
FBgn0003139	3.07656	0.0499256	61.623	43.5066	68.5438	49.8076
FBgn0036104	5.02779	0.0816661	61.5652	49.8339	69.9522	94.0993
FBgn0037347	18.7279	0.304723	61.4588	67.1485	24.0603	6.66576
FBgn0029941	3.57252	0.0581648	61.4207	137.122	176.478	216.983
FBgn0032514	5.89947	0.0962359	61.3021	14.5441	25.2451	26.9835
FBgn0031608	6.20252	0.101197	61.2915	8.91185	16.7874	18.1395
FBgn0039958	7.40695	0.121019	61.205	91.3046	249.698	90.7681
FBgn0028581	53.1843	0.869437	61.171	0	0.355343	3.05387
FBgn0030912	9.08969	0.1489	61.0457	5.82828	1.35004	2.97604
FBgn0031544	3.51131	0.0576062	60.9536	72.8908	110.53	109.765
FBgn0053509	18.799	0.308609	60.9153	0.597802	6.79441	0.496994
FBgn0037936	43.444	0.71428	60.8221	10.85	6.46195	0.0589091
FBgn0004595	10.3198	0.170053	60.6857	34.6735	57.1983	146.889
FBgn0030876	5.59164	0.0922191	60.6343	24.8876	28.3337	12.8764
FBgn0032475	3.999	0.0660047	60.5866	31.4473	32.5258	50.4409
FBgn0031054	6.24178	0.103161	60.5052	25.4791	23.836	11.6205
FBgn0036959	13.0606	0.216018	60.4607	7.96344	54.0134	12.5024
FBgn0031904	3.06339	0.0507226	60.395	85.0758	133.149	89.6735
FBgn0000032	5.12392	0.0850202	60.2671	17.8927	25.9587	35.3491
FBgn0036405	5.6723	0.0941932	60.2199	14.952	11.1207	27.3245
FBgn0004893	10.1925	0.169552	60.1147	1.156	1.2804	0.284834
FBgn0036396	3.50923	0.0584512	60.0369	10.4776	17.4268	13.7354
FBgn0260986	26.8336	0.447457	59.9693	0.82197	61.4034	0.398846
FBgn0032250	4.36552	0.0728199	59.9496	19.0663	33.0424	30.2887
FBgn0037884	2.58036	0.0431322	59.8245	57.5609	74.3664	75.6396
FBgn0030806	2.0606	0.0345888	59.5743	31.7767	43.6403	35.5772
FBgn0260768	20.2856	0.340873	59.5106	1.34255	4.22506	21.0259
FBgn0032789	21.6541	0.364391	59.4256	0.246686	2.55177	3.25111
FBgn0266580	11.1359	0.188149	59.1864	7.13517	10.046	27.847
FBgn0031238	4.55225	0.0769163	59.1845	17.4997	31.2798	27.5046
FBgn0038145	2.98429	0.0504607	59.1409	543.246	680.603	788.342
FBgn0022338	4.82239	0.0816844	59.0369	19.9071	28.4196	37.1024
FBgn0032002	10.4832	0.17799	58.8977	10.5224	26.5594	34.4882
FBgn0032688	3.23302	0.0549247	58.8628	21.9498	32.8289	28.9849
FBgn0037898	5.99025	0.101896	58.7878	21.8108	19.4744	46.3818
FBgn0030945	7.82327	0.133449	58.6236	21.6389	44.783	55.4759
FBgn0030189	9.48441	0.162191	58.4766	13.5781	13.5007	46.301
FBgn0029105	3.76522	0.0644022	58.4642	78.317	122.624	114.76
FBgn0033060	5.25833	0.08995	58.4583	25.0496	19.4095	44.7978
FBgn0010504	18.4327	0.317247	58.1021	5.04614	4.01097	45.636
FBgn0034541	19.8384	0.341792	58.0424	6.2048	1.53146	1.42762
FBgn0040056	7.97461	0.137436	58.0242	363.982	107.939	206.731
FBgn0029002	8.5408	0.147367	57.9559	20.6034	13.1332	6.87883
FBgn0038595	9.26863	0.160281	57.8273	0.459168	0.276772	1.32906
FBgn0039125	5.50711	0.095292	57.792	6.46273	13.3024	6.22493
FBgn0266464	3.94566	0.0683368	57.7384	32.508	35.4753	55.3812
FBgn0038292	59.1538	1.02537	57.6902	1.9028	5.26278	0
FBgn0041621	37.9641	0.658078	57.6894	2.84772	0.295978	0.0242213
FBgn0031321	4.19326	0.0727353	57.651	9.47923	5.02974	10.5903
FBgn0265767	6.73927	0.116949	57.6259	220.984	76.5293	148.821
FBgn0262518	4.16514	0.0722923	57.6152	52.9074	93.0115	84.1523
FBgn0040534	3.63841	0.0633076	57.4719	90.9638	122.577	62.3068
FBgn0028554	3.66569	0.0638095	57.4474	105.591	163.772	145.175
FBgn0261258	8.33376	0.145393	57.3188	115.929	173.802	42.5409
FBgn0262808	15.2708	0.266579	57.2842	4.02089	0.744883	0.873538
FBgn0023094	7.72348	0.135144	57.1498	37.1197	59.4472	106.059
FBgn0019972	5.44606	0.0953257	57.1311	11.0932	21.2767	19.7994
FBgn0029878	5.42416	0.0949463	57.1287	37.7224	64.098	71.7741
FBgn0038854	6.68155	0.116983	57.1155	11.9981	15.2377	27.7712
FBgn0052683	4.70475	0.0823807	57.1098	48.9676	56.2172	100.765
FBgn0042630	4.0564	0.0711258	57.0313	33.1505	41.9134	55.9414
FBgn0283681	3.88475	0.0683586	56.8289	10.4738	10.7022	16.9484
FBgn0003741	7.91511	0.13956	56.7148	42.1149	104.048	105
FBgn0024913	7.67072	0.13531	56.6901	75.6109	99.1934	211.95
FBgn0031062	4.06855	0.0718379	56.6351	11.2143	20.6814	13.2552
FBgn0035622	2.83244	0.0500191	56.6271	42.434	59.1016	57.459
FBgn0030742	4.56702	0.0808501	56.4876	156.977	187.555	276.703
FBgn0033463	4.03334	0.071573	56.3528	172.328	309.37	216.029
FBgn0031239	7.86707	0.140183	56.1199	34.7196	24.3692	86.1533
FBgn0035842	7.54277	0.134692	56.0001	3.70768	10.059	7.76245
FBgn0030039	6.33307	0.113108	55.9911	32.328	42.4452	16.9666
FBgn0259483	3.86476	0.0690608	55.9617	109.689	161.006	163.794
FBgn0030114	5.39069	0.0965841	55.8134	27.113	34.9981	52.5442
FBgn0035868	27.496	0.493298	55.7391	0.737611	39.2899	2.99953
FBgn0038811	9.63452	0.173074	55.667	12.0612	16.3508	41.3744
FBgn0035008	28.3243	0.509648	55.5763	0.654625	0.0193266	1.53634
FBgn0027335	4.91941	0.0885337	55.5654	36.5608	53.5306	64.992
FBgn0039149	6.82629	0.123066	55.4683	128.783	81.1125	252.602
FBgn0039904	12.0303	0.217209	55.3859	52.1624	189.29	196.027
FBgn0037654	6.81168	0.123019	55.3712	6.28053	8.637	14.7353
FBgn0066114	7.64348	0.138041	55.3709	29.992	66.5681	69.3931
FBgn0033134	16.4057	0.297242	55.193	5.57107	12.0234	46.6621
FBgn0259228	4.92947	0.0893613	55.1634	60.8726	56.2025	114.796
FBgn0044047	12.0299	0.218298	55.1075	24.1584	8.63839	5.82238
FBgn0040207	4.52228	0.0820724	55.1011	22.9286	36.3661	36.6082
FBgn0032204	5.58127	0.101389	55.0483	20.5161	31.0599	40.8064
FBgn0032488	3.14668	0.0571984	55.0134	37.5104	48.0584	56.0298
FBgn0020907	4.93805	0.0897897	54.9958	401.962	675.208	751.015
FBgn0085319	41.6728	0.758381	54.9497	0	1.39822	0.0385971
FBgn0032161	9.61842	0.175193	54.902	1.56027	4.6737	4.46234
FBgn0033434	1.93705	0.0352982	54.8769	100.669	131.736	99.6835
FBgn0010309	4.15715	0.0761021	54.6259	30.9668	40.6499	52.702
FBgn0038139	9.68409	0.1773	54.6199	4.32312	10.1313	14.5202
FBgn0264894	10.6935	0.196074	54.538	3.95161	0.904253	1.54389
FBgn0032409	1.51278	0.0278797	54.261	27.835	34.2017	33.0551
FBgn0260458	19.2936	0.355894	54.2115	2.70458	5.70447	39.4704
FBgn0038063	14.8442	0.273832	54.2094	64.4445	8.59191	32.3556
FBgn0032388	4.94257	0.0914443	54.0501	56.8526	82.0282	105.369
FBgn0033474	6.36448	0.117794	54.0305	29.1689	34.8671	64.9639
FBgn0036402	4.33244	0.0802214	54.0061	36.7847	24.6712	21.2675
FBgn0033951	5.26208	0.0974529	53.9962	53.1668	87.9839	99.8703
FBgn0033784	2.64603	0.0491134	53.876	26.9463	33.6342	38.2277
FBgn0050345	19.9825	0.371395	53.8038	2.79093	1.47347	0.157995
FBgn0038542	5.53922	0.102976	53.7913	16.752	24.3733	37.8472
FBgn0034530	16.1298	0.300065	53.7545	0.979501	3.2928	0.230855
FBgn0030057	5.72388	0.106486	53.7525	12.7695	27.0067	18.5614
FBgn0052206	10.1656	0.189239	53.7185	47.4227	66.1738	13.6034
FBgn0030082	3.61459	0.0673607	53.6602	47.6566	51.3931	29.5791
FBgn0005658	4.50209	0.0839248	53.6444	36.5911	57.6707	65.028
FBgn0032703	5.20512	0.0970827	53.6153	22.4781	24.586	44.53
FBgn0023181	17.9047	0.333991	53.6083	9.93394	1.29079	1.35975
FBgn0037757	4.07515	0.0760411	53.5914	31.7973	54.2703	43.5331
FBgn0051760	3.5883	0.0670541	53.5135	98.2717	128.493	157.458
FBgn0087039	4.69961	0.0878351	53.5049	30.6077	21.7799	16.454
FBgn0037252	3.5629	0.0666341	53.4696	38.9512	60.7395	50.4154
FBgn0037615	26.4782	0.495683	53.4177	1.55148	32.1607	34.38
FBgn0038532	9.01799	0.168821	53.4175	17.1992	20.9089	55.7299
FBgn0031143	6.24446	0.11697	53.3852	34.1424	40.2062	80.5243
FBgn0062440	5.2825	0.0989543	53.3833	187.306	356.142	371.485
FBgn0037844	19.8341	0.371598	53.3751	0.817661	2.32934	13.9972
FBgn0011708	5.01849	0.0940568	53.356	62.9584	103.563	104.214
FBgn0032639	18.4832	0.34665	53.3194	0.722795	4.0619	0.162993
FBgn0037624	5.31051	0.0997259	53.251	35.0454	40.2313	71.0696
FBgn0004597	5.15934	0.0969029	53.2424	27.0763	47.9459	47.2044
FBgn0039938	5.30044	0.0996435	53.194	72.5525	63.0108	137.838
FBgn0027564	6.07893	0.114306	53.1812	38.4779	68.4482	79.3275
FBgn0037200	8.90022	0.167517	53.1304	7.1527	8.38691	22.7632
FBgn0000319	2.53398	0.0477134	53.1084	199.619	252.145	262.923
FBgn0036038	4.77048	0.0898679	53.0832	5.17476	7.61835	9.276
FBgn0000711	4.28244	0.0807317	53.0453	181.299	203.879	334.454
FBgn0023534	7.58678	0.143227	52.9704	136.184	58.232	255.683
FBgn0051249	2.52516	0.0476986	52.9399	25.4585	19.657	17.7389
FBgn0038427	1.94811	0.0368167	52.9137	56.9576	71.5469	70.8793
FBgn0050052	18.3994	0.348168	52.8463	3.06602	22.3374	26.7505
FBgn0037137	4.2603	0.0806733	52.8093	24.2328	32.2638	42.6238
FBgn0032299	53.311	1.01069	52.7472	1.14208	1.19444	0
FBgn0038183	5.77217	0.109454	52.7361	19.6273	44.5968	25.0056
FBgn0005427	4.63936	0.0882652	52.5616	73.5425	150.478	88.1933
FBgn0029936	5.73527	0.109467	52.3928	22.7114	21.1722	45.6211
FBgn0037391	2.61662	0.050104	52.2238	122.569	159.458	164.682
FBgn0013435	3.2763	0.0627728	52.1929	24.2998	24.3893	38.0801
FBgn0035627	12.985	0.248972	52.1544	0.673729	0.684087	3.9733
FBgn0031117	8.92192	0.171147	52.1303	8.28236	14.2702	24.4271
FBgn0038016	3.47616	0.0666991	52.1171	31.2645	44.9548	24.2716
FBgn0038747	2.74512	0.0529023	51.8903	35.1077	32.3948	50.3805
FBgn0284436	4.43154	0.0854393	51.8678	71.771	67.7029	130.345
FBgn0039183	4.20559	0.0810859	51.8659	6.93246	12.4364	9.48681
FBgn0033297	64.0892	1.23603	51.851	0	0.0466955	22.1496
FBgn0035473	2.77252	0.0534872	51.8352	259.233	335.027	364.015
FBgn0000273	8.04574	0.155288	51.8119	151.282	351.057	419.687
FBgn0004401	9.49755	0.183588	51.7329	123.025	360.578	497.113
FBgn0031434	28.3425	0.547915	51.728	10.232	3.15358	0.309649
FBgn0031895	2.72232	0.0526576	51.6986	22.5518	17.2631	28.0972
FBgn0046222	3.22207	0.0623518	51.6756	18.1114	25.099	26.4562
FBgn0029665	3.9219	0.0759863	51.6133	42.501	69.4944	65.494
FBgn0000376	2.84511	0.0551243	51.6126	16.3834	18.8159	24.7094
FBgn0038488	3.77842	0.0732494	51.583	27.7176	34.1754	45.8812
FBgn0001990	6.09548	0.118207	51.566	9.90526	16.8159	21.9943
FBgn0011640	5.0522	0.0981239	51.488	103.803	208.402	155.879
FBgn0037030	25.5122	0.496529	51.3811	3.1455	146.299	9.89604
FBgn0038428	4.81105	0.0937168	51.336	62.2725	33.8303	39.0467
FBgn0003189	10.9456	0.213292	51.3174	5.07442	1.3828	1.67479
FBgn0022069	3.49383	0.0681155	51.2927	25.4195	35.5103	38.1562
FBgn0029882	5.35131	0.104361	51.277	60.4103	62.0242	120.11
FBgn0027873	6.35195	0.124266	51.1157	8.28033	10.9031	19.741
FBgn0040236	4.37201	0.0856409	51.0505	23.7782	33.0467	40.6266
FBgn0264305	8.20027	0.16096	50.9459	26.3966	76.9141	31.888
FBgn0030521	5.05181	0.0992493	50.9002	174.674	300.714	307.403
FBgn0038640	5.76363	0.113422	50.8159	12.8284	13.1307	26.6151
FBgn0016672	5.44011	0.107275	50.7119	266.951	370.569	156.569
FBgn0033551	3.36283	0.0663431	50.6885	60.4641	74.7368	96.984
FBgn0031314	3.81122	0.0752649	50.6374	8.30101	8.18715	13.7273
FBgn0043070	2.07841	0.0411566	50.5001	459.721	606.777	609.365
FBgn0030556	4.03075	0.0798717	50.4653	67.0152	91.6431	45.8872
FBgn0262719	24.7709	0.490898	50.4603	0.424989	11.8621	0.202858
FBgn0051664	39.3897	0.780857	50.4443	1.09666	0	0.0823261
FBgn0035085	10.1278	0.201013	50.3838	2.96518	2.63037	10.961
FBgn0034963	4.94767	0.0983734	50.2947	38.4458	19.7611	27.7229
FBgn0030030	3.28554	0.0653317	50.2901	76.6756	107.073	67.8083
FBgn0033226	4.52704	0.0900257	50.2861	46.1572	88.6836	62.6566
FBgn0039994	7.24531	0.144211	50.241	83.645	233.22	149.626
FBgn0266518	6.89548	0.137599	50.1127	15.8251	24.984	40.0553
FBgn0034585	4.51867	0.0902207	50.0846	40.0647	64.8162	66.316
FBgn0032216	1.60979	0.0321997	49.9938	68.1892	78.3338	83.4638
FBgn0051812	8.72733	0.174791	49.9302	8.65316	11.8132	26.3534
FBgn0029121	6.99617	0.140218	49.8951	9.42406	17.8651	23.6401
FBgn0039450	2.51115	0.0503851	49.8391	31.5346	42.3687	39.7782
FBgn0024733	2.99136	0.0600377	49.8248	1421.41	2177.5	1827.99
FBgn0030274	6.87122	0.137989	49.7954	26.2272	29.8952	65.1546
FBgn0030090	5.42492	0.10899	49.7745	39.3667	17.1122	29.6772
FBgn0037465	6.80867	0.136834	49.7587	49.9798	23.0382	25.4868
FBgn0033527	4.80551	0.0965811	49.7562	12.599	17.1582	24.7323
FBgn0052945	56.8521	1.14394	49.6986	0	26.7794	0
FBgn0052638	5.82904	0.117362	49.6672	39.6464	71.1419	79.5706
FBgn0260741	4.64791	0.0936274	49.6427	16.0836	10.7329	8.81086
FBgn0033483	6.81317	0.137618	49.508	47.4125	55.6747	109.751
FBgn0030648	5.39068	0.109038	49.4387	155.529	265.637	293.017
FBgn0035316	22.9339	0.464334	49.3908	0.504834	1.51799	0.0477073
FBgn0085377	4.43834	0.0898699	49.3863	16.8579	18.5536	30.2567
FBgn0034894	4.85632	0.0983346	49.3857	56.365	77.1532	102.2
FBgn0023023	3.75938	0.0763358	49.2479	178.095	191.869	111.06
FBgn0037538	3.73863	0.0760848	49.1377	24.3657	33.6311	38.609
FBgn0029873	5.46122	0.111154	49.1321	18.552	17.2752	35.6388
FBgn0051495	3.16738	0.064488	49.1159	0.702024	1.05667	0.614877
FBgn0039232	4.55392	0.0928077	49.0683	100.678	194.719	146.834
FBgn0039855	24.272	0.495047	49.0296	1.64695	0.490967	26.0831
FBgn0042132	2.00756	0.0410035	48.9606	88.5358	123.531	95.9751
FBgn0008635	4.00831	0.0819474	48.9132	56.6645	71.8974	98.6277
FBgn0033443	8.98578	0.183932	48.8538	2.9262	9.41971	6.47704
FBgn0000253	9.52856	0.19516	48.8243	888.822	2931.12	3157.58
FBgn0035400	2.4755	0.0507091	48.8177	180.94	259.132	179.427
FBgn0262716	3.31577	0.0679679	48.7844	48.2505	62.8432	72.8594
FBgn0036908	3.88902	0.0797419	48.77	44.8523	45.4862	27.5563
FBgn0050481	8.76786	0.180019	48.7051	32.0932	26.6395	88.5332
FBgn0264546	12.8066	0.263181	48.661	1.308	4.62441	0.466856
FBgn0031896	4.02759	0.0829033	48.5818	104.638	164.338	156.639
FBgn0027515	4.41037	0.0908704	48.5348	42.0907	51.6669	76.9148
FBgn0032691	3.98042	0.0820449	48.5152	7.91024	10.992	13.59
FBgn0039925	16.5144	0.340509	48.499	18.4362	211.262	71.1832
FBgn0001978	3.40478	0.0702095	48.4945	26.7711	43.4735	36.2953
FBgn0026239	4.13897	0.0855022	48.4078	10.093	14.7595	16.6782
FBgn0034259	2.57555	0.0532254	48.3895	110.401	129.661	153.364
FBgn0040389	5.12156	0.106019	48.3077	86.1833	185.424	117.179
FBgn0036882	4.25392	0.0881575	48.2536	129.865	83.6113	73.4721
FBgn0037489	3.02737	0.0627646	48.2338	9.9778	11.35	15.1667
FBgn0259178	2.03227	0.0421359	48.2312	79.7227	101.876	104.83
FBgn0040351	3.96687	0.082255	48.2264	119.821	189.235	180.974
FBgn0083976	23.6791	0.491726	48.155	6.48312	74.4113	0.438887
FBgn0039169	3.36592	0.0699075	48.1482	11.3313	16.3747	16.0338
FBgn0032801	6.16575	0.128331	48.0455	9.22203	9.2088	4.07732
FBgn0030932	11.7838	0.245895	47.9222	3.94759	2.47036	16.2376
FBgn0030086	4.18584	0.0873607	47.9144	64.948	79.9749	111.805
FBgn0036911	3.10846	0.0651155	47.7377	66.2623	40.7866	57.2429
FBgn0023536	4.89215	0.102573	47.6943	16.204	23.7994	31.2137
FBgn0030701	2.70486	0.056833	47.593	82.3857	97.8005	119.124
FBgn0015288	3.45273	0.0725559	47.5871	1280.05	804.036	1057
FBgn0033378	3.08391	0.0648543	47.5513	51.6538	63.5602	79.8283
FBgn0035760	8.03155	0.168951	47.5378	5.70891	1.55796	5.57535
FBgn0010482	7.54311	0.159164	47.3921	0.779667	0.903407	2.39917
FBgn0026369	4.0984	0.0866683	47.2884	55.1162	85.9573	85.5177
FBgn0052736	21.3972	0.452559	47.2805	23.5385	80.5715	1.8414
FBgn0250869	4.07355	0.0861571	47.2804	94.0545	52.1842	104.004
FBgn0002872	6.46448	0.136764	47.2675	6.53712	17.5706	10.0471
FBgn0013725	3.05155	0.0645603	47.2667	106.078	134.217	155.428
FBgn0025608	3.66188	0.0775188	47.2386	89.9095	139.158	117.018
FBgn0024754	3.021	0.0641318	47.106	145.174	185.832	217.405
FBgn0030864	5.99092	0.127822	46.8692	14.5769	20.5219	30.948
FBgn0266432	31.9423	0.681542	46.8677	0.331952	38.3163	1.17062
FBgn0030217	3.59032	0.0766185	46.8597	12.7445	7.60818	9.74156
FBgn0015781	3.27322	0.0698599	46.8541	83.57	81.343	126.769
FBgn0033911	2.73613	0.0583999	46.8515	212.816	266.498	307.015
FBgn0052792	12.6345	0.269834	46.8233	2.26136	9.00712	8.94581
FBgn0039808	4.68981	0.100386	46.7177	77.8203	132.03	132.663
FBgn0036145	9.74477	0.208888	46.6506	391.937	103.067	507.966
FBgn0041004	9.05644	0.194275	46.6166	45.7044	126.038	112.55
FBgn0020238	4.73839	0.101792	46.55	525.896	816.737	879.481
FBgn0038494	3.54248	0.0761844	46.4988	67.4408	103.693	90.9292
FBgn0030514	2.59161	0.0557497	46.4866	48.7165	67.3685	62.9088
FBgn0017577	16.3711	0.352942	46.3847	0.969538	3.94093	8.63848
FBgn0038373	22.9704	0.495216	46.3845	0.244829	0.586678	4.61563
FBgn0031753	5.65606	0.121953	46.3789	68.7422	91.297	138.924
FBgn0031710	1.70372	0.0367358	46.3775	33.5964	39.1908	41.1334
FBgn0014075	3.88569	0.0837855	46.3767	27.6155	45.4281	38.4761
FBgn0040477	33.7673	0.730146	46.2473	0.265045	46.3203	0.175899
FBgn0259722	3.92997	0.0850302	46.2185	58.146	37.6083	34.5122
FBgn0261794	3.11242	0.0673573	46.2076	1013.3	1382.61	1398.92
FBgn0039858	3.9321	0.0852325	46.1338	414.528	305.592	634.605
FBgn0030341	4.19726	0.0911424	46.0517	77.594	116.425	125.388
FBgn0263747	54.0638	1.17472	46.0227	0.0125278	0.114468	11.4748
FBgn0085292	19.6806	0.428126	45.9692	0.682464	4.12904	9.19074
FBgn0034158	4.71267	0.102561	45.9499	45.1766	75.2337	80.369
FBgn0037653	4.36554	0.0950179	45.9444	59.5182	87.4657	99.0904
FBgn0038585	5.58011	0.121506	45.9246	27.4438	42.9224	51.6857
FBgn0036789	3.03863	0.0662174	45.8886	20.1443	29.7901	26.7517
FBgn0000117	2.23653	0.0488012	45.8294	390.642	510.656	499.005
FBgn0011642	6.84382	0.149554	45.7616	186.777	449.072	153.961
FBgn0037234	3.75498	0.0820911	45.7417	66.6969	54.7188	106.134
FBgn0036973	3.87732	0.0847753	45.7364	16.6063	18.9983	10.5669
FBgn0032512	4.09052	0.0895512	45.678	13.3928	21.0262	21.917
FBgn0286051	3.21375	0.0705267	45.5678	20.0726	23.3297	31.4218
FBgn0032816	4.75443	0.104393	45.5438	42.0514	50.7347	78.9348
FBgn0040285	4.34326	0.0957503	45.3603	59.3911	88.0778	106.668
FBgn0036391	4.33252	0.0955589	45.3388	78.8556	92.4178	137.835
FBgn0020510	3.06541	0.0676248	45.3296	43.8002	54.092	67.8764
FBgn0250904	48.3506	1.06802	45.2712	0	0	8.03854
FBgn0037697	4.60448	0.101767	45.2455	22.592	30.7279	42.8497
FBgn0050051	7.50337	0.165895	45.2297	21.1913	8.00471	29.4626
FBgn0033186	5.31973	0.117623	45.2268	4.95519	7.87473	10.1098
FBgn0086687	2.13888	0.0472951	45.2242	542.346	771.158	551.222
FBgn0260238	38.8471	0.859512	45.1967	0.845316	0	2.38748
FBgn0261437	7.7894	0.172607	45.128	33.8027	36.1861	96.775
FBgn0034950	3.39703	0.0753235	45.0992	35.0727	42.6898	53.3805
FBgn0037384	6.93263	0.15375	45.0903	18.1893	23.0368	47.314
FBgn0031036	3.21416	0.07134	45.0541	22.8315	33.3052	31.1567
FBgn0040392	11.8185	0.263643	44.8278	1.50931	0.278712	0.534307
FBgn0030512	3.31389	0.0739782	44.7956	18.8734	22.6847	30.3003
FBgn0052687	8.40607	0.187708	44.7828	5.03743	8.4761	15.0341
FBgn0027508	3.33808	0.0745984	44.7473	37.972	51.9541	57.7044
FBgn0026869	10.8594	0.243081	44.6743	56.2269	82.8575	235.288
FBgn0010113	7.42336	0.166406	44.6099	27.6564	11.5896	11.7516
FBgn0033348	9.95015	0.223193	44.581	4.72519	2.11745	11.3336
FBgn0038947	3.00746	0.0675891	44.4963	161.675	222.903	220.993
FBgn0010894	2.88844	0.0649557	44.4678	14.4449	19.2788	20.6651
FBgn0033316	4.49318	0.101278	44.365	27.6265	18.0465	16.329
FBgn0032732	3.57568	0.0806302	44.3467	58.3728	75.7217	94.0122
FBgn0036641	5.80306	0.130984	44.3037	26.9242	39.8795	53.7744
FBgn0040066	3.47078	0.078362	44.2916	27.104	23.9913	40.3076
FBgn0037843	4.2437	0.0959565	44.2252	50.9106	70.3567	90.1441
FBgn0037690	3.78763	0.0856616	44.2162	107.354	142.692	180.526
FBgn0026760	25.7424	0.582498	44.1932	0.211625	5.95329	3.42107
FBgn0000064	2.18569	0.0494692	44.1827	945.768	1234.25	1194.96
FBgn0086444	9.16552	0.207447	44.1825	9.84729	12.4919	35.0416
FBgn0038156	3.95601	0.0896628	44.121	88.0502	60.204	135.861
FBgn0038855	4.11036	0.0933805	44.0173	21.9554	29.504	38.0557
FBgn0029980	5.98767	0.136148	43.9792	17.5026	30.6775	37.7453
FBgn0028475	3.10265	0.070576	43.9619	34.0856	42.439	51.181
FBgn0032005	3.0806	0.070125	43.9302	82.4054	125.746	99.4726
FBgn0030943	10.6391	0.242278	43.913	11.4194	51.3547	37.2182
FBgn0286567	3.24543	0.0739105	43.9103	24.1978	29.7618	36.0206
FBgn0052732	6.74532	0.153632	43.9057	11.3945	16.8662	27.518
FBgn0052600	6.29161	0.143405	43.873	73.9198	79.3145	28.2482
FBgn0031351	4.0003	0.091291	43.8192	8.96792	8.77622	15.2425
FBgn0004587	3.35677	0.0767226	43.752	406.068	362.141	633.885
FBgn0266916	13.1792	0.30123	43.7513	1.97519	1.32261	10.0507
FBgn0028919	9.289	0.212318	43.7504	17.2768	56.4875	23.4086
FBgn0038593	3.47056	0.0793849	43.7181	14.0446	17.0885	22.7252
FBgn0029685	3.04301	0.0697102	43.6523	26.957	36.3378	20.9457
FBgn0013334	5.16517	0.118438	43.6109	642.427	973.984	1432.95
FBgn0262102	22.8229	0.523366	43.6079	1.99953	11.4832	30.4116
FBgn0261787	4.30804	0.0988384	43.5867	27.4364	32.8997	47.72
FBgn0033683	10.3338	0.23719	43.5679	14.4282	3.32651	5.02059
FBgn0026143	3.61047	0.0828814	43.5619	15.8384	26.0853	12.8068
FBgn0042180	4.12675	0.0948699	43.4991	29.9931	41.5492	49.4692
FBgn0026403	12.5635	0.288987	43.4741	0.289651	0.675933	1.64584
FBgn0030306	6.82342	0.157108	43.4314	42.3325	95.8921	80.7717
FBgn0037877	3.54789	0.0817857	43.3804	33.4118	40.5968	22.5423
FBgn0030329	4.45435	0.10281	43.3261	100.208	119.362	176.169
FBgn0034577	3.60161	0.0831591	43.3099	35.9766	51.0336	49.0912
FBgn0262035	9.39056	0.217161	43.2423	3.31258	9.36376	2.14558
FBgn0037385	69.11	1.60305	43.1115	8.20804e-05	3.82199	38.3693
FBgn0029905	3.66242	0.0849586	43.1083	15.3833	23.7477	22.8786
FBgn0033468	2.31696	0.0537793	43.0827	20.2463	19.3214	27.8547
FBgn0004842	5.70636	0.13253	43.0571	3.2181	5.34545	6.00439
FBgn0263046	84.4026	1.96072	43.0467	0	9.08154	65.3276
FBgn0036760	4.45181	0.103422	43.045	60.0288	66.2874	107.582
FBgn0266421	6.8858	0.159982	43.0411	27.1299	74.7909	34.5011
FBgn0263240	18.5727	0.431842	43.0081	4.2274	0.65097	0.511547
FBgn0001565	5.91773	0.137642	42.9936	85.3749	89.666	185.702
FBgn0038072	10.4399	0.242867	42.9863	2.54266	5.13331	9.91579
FBgn0050008	5.98945	0.139458	42.948	1.46468	1.79283	3.63888
FBgn0037755	6.26497	0.146004	42.9097	26.7104	63.8652	31.9067
FBgn0030748	32.334	0.753605	42.9057	0.0378212	3.6341	0.638805
FBgn0014877	5.16612	0.120469	42.8835	69.0001	131.868	113.052
FBgn0037134	5.33511	0.12471	42.78	130.823	112.959	240.63
FBgn0261059	61.0578	1.4274	42.7754	2.9902	0	0
FBgn0085259	47.754	1.11779	42.722	0	0	3.00697
FBgn0030743	4.3152	0.101059	42.6999	140.621	92.1206	80.7818
FBgn0035944	4.95081	0.116	42.6795	68.2861	101.348	127.455
FBgn0013263	7.30694	0.171223	42.6751	55.1538	122.326	134.894
FBgn0039861	5.13857	0.120474	42.653	15.0869	24.3102	30.8236
FBgn0037708	4.96748	0.116502	42.6388	15.8478	11.9345	25.9707
FBgn0039560	2.4921	0.0585625	42.5545	33.3064	46.7016	30.6686
FBgn0262114	4.03427	0.094818	42.5475	82.4237	109.082	148.688
FBgn0032252	27.2022	0.639894	42.5105	7.02247	12.7107	0.290976
FBgn0025583	10.2359	0.240797	42.5086	13.1082	66.2382	19.4771
FBgn0001105	3.71452	0.0874172	42.4919	371.888	518.077	576.283
FBgn0037370	6.66935	0.157149	42.4398	22.1133	12.1956	41.0796
FBgn0032781	4.04375	0.0953068	42.4288	38.1145	19.7108	32.6367
FBgn0003963	4.35825	0.10284	42.3791	7.33065	7.44099	13.7317
FBgn0052672	2.24117	0.0529294	42.3427	716.942	790.814	970.202
FBgn0266674	2.93331	0.0692932	42.332	18.6473	18.0795	26.9743
FBgn0036136	3.55066	0.083879	42.3307	77.2193	88.0964	120.494
FBgn0035526	4.776	0.113009	42.2623	178.688	208.783	358.141
FBgn0037619	3.8943	0.0921711	42.2508	9.86645	11.0509	17.0331
FBgn0014879	4.0536	0.0959547	42.245	59.0603	65.1643	100.762
FBgn0035876	3.30172	0.0781739	42.2356	14.3334	22.5385	12.0757
FBgn0040877	5.05568	0.119704	42.2349	58.3555	96.1133	97.7465
FBgn0054027	40.0579	0.952411	42.0595	0.40143	2.71197	0
FBgn0035204	6.78176	0.16153	41.9844	93.1524	189.532	73.1151
FBgn0034371	3.12021	0.0743525	41.9651	85.5866	137.266	95.8544
FBgn0032946	7.34793	0.175135	41.9558	787.718	2266.29	1504.09
FBgn0011297	15.2955	0.364694	41.9408	11.5404	109.61	20.6483
FBgn0286508	13.8003	0.329245	41.9149	14.1652	58.6311	65.8501
FBgn0029943	1.7114	0.0408799	41.8641	34.181	38.9411	42.1998
FBgn0032339	3.67086	0.0877459	41.8351	13.5629	18.026	21.6461
FBgn0032848	18.0244	0.431198	41.8008	1.55946	0.156185	1.6807
FBgn0010342	3.39676	0.0813984	41.7301	34.3788	39.8212	55.0961
FBgn0259705	5.93309	0.142342	41.682	17.1203	28.1062	33.7076
FBgn0037609	3.40706	0.0817763	41.6631	32.0222	37.2788	51.3858
FBgn0052772	4.89398	0.117487	41.6554	56.9895	61.8765	104.563
FBgn0034009	2.8762	0.0690931	41.6279	35.7652	56.5917	42.7831
FBgn0031058	45.4099	1.09126	41.6125	0.423713	67.3685	0.0395754
FBgn0026063	36.7927	0.886074	41.5233	1.46369	0	0
FBgn0005672	3.95809	0.0953946	41.4917	205.834	347.625	308.619
FBgn0036663	4.08236	0.0984328	41.4735	438.072	590.782	738.3
FBgn0037924	2.16765	0.0522843	41.4589	12.4771	9.19865	14.6778
FBgn0031228	8.12937	0.196117	41.4515	222.744	534.513	505.395
FBgn0086384	4.20564	0.101509	41.4312	10.3889	19.3203	13.3848
FBgn0015924	5.59555	0.135189	41.3904	57.2788	131.695	76.9783
FBgn0261933	5.89276	0.14244	41.3701	11.7952	20.5752	25.9221
FBgn0284256	3.64933	0.088212	41.37	58.8556	90.2111	84.323
FBgn0030874	6.10974	0.147785	41.3419	7.58592	9.66133	16.986
FBgn0020930	4.97284	0.12039	41.3061	68.8296	114.926	116.934
FBgn0037715	3.76614	0.0912514	41.2721	101.702	174.851	142.972
FBgn0010235	3.29869	0.0799935	41.237	170.996	235.708	257.436
FBgn0053178	28.9506	0.702415	41.2159	1.7868	57.7428	17.8743
FBgn0053170	3.83513	0.093066	41.2087	176.329	106.511	115.133
FBgn0263916	5.57473	0.135321	41.1964	12.5129	24.4008	13.9164
FBgn0035036	4.10065	0.0996602	41.1463	15.2403	22.8443	25.8186
FBgn0028398	3.38034	0.0822316	41.1075	65.3336	103.456	55.0642
FBgn0038504	6.10889	0.148641	41.0982	61.0599	127.528	127.356
FBgn0037713	8.09293	0.197114	41.0571	12.5871	16.7647	37.8369
FBgn0033615	4.6346	0.112923	41.0421	16.7488	18.7187	30.5849
FBgn0040347	4.37245	0.106538	41.0414	5.41896	7.0768	3.57344
FBgn0038828	2.62943	0.064114	41.0118	90.0751	115.422	124.249
FBgn0031483	5.72677	0.139666	41.0032	46.408	53.541	24.0324
FBgn0002891	9.58916	0.233928	40.9919	4.07637	16.0238	8.35909
FBgn0051183	3.49375	0.0852379	40.9882	8.549	10.5804	13.6536
FBgn0001341	5.58457	0.136271	40.9813	8.84377	18.8002	13.9032
FBgn0036671	4.351	0.106188	40.9746	18.7033	34.577	28.0796
FBgn0035825	5.08502	0.124143	40.9609	25.8816	51.1652	23.18
FBgn0023509	6.14076	0.150237	40.8739	16.5327	29.643	31.1186
FBgn0025519	3.62416	0.0887364	40.8418	27.6828	44.6221	37.3283
FBgn0039291	3.40088	0.0834319	40.7624	16.3762	27.0181	20.7757
FBgn0050423	3.62055	0.0888511	40.7485	130.573	215.541	124.44
FBgn0087012	6.86872	0.168696	40.7166	26.3905	35.3028	61.4882
FBgn0034086	13.8948	0.342195	40.605	15.7983	153.208	19.6605
FBgn0001311	26.0931	0.642797	40.5931	0.0348196	0.0735076	1.3153
FBgn0033570	4.59124	0.113123	40.5862	353.486	529.304	589.09
FBgn0039622	55.1057	1.35865	40.5592	3.19295	15.0908	0
FBgn0000667	3.68931	0.0909676	40.5563	47.3041	61.2925	77.5301
FBgn0259216	23.7641	0.586254	40.5355	33.4596	44.7341	1.60567
FBgn0031836	2.88922	0.0713479	40.4949	114.153	138.837	164.112
FBgn0030894	4.49033	0.110989	40.4575	25.733	40.9108	44.1786
FBgn0035995	2.80046	0.0693437	40.3853	65.1895	81.6591	95.0259
FBgn0031039	6.74621	0.167239	40.3388	23.9359	17.7681	52.0485
FBgn0027084	3.38165	0.0838549	40.3274	51.2313	72.8537	40.962
FBgn0259985	3.84284	0.0953998	40.2814	27.6527	49.0916	33.6061
FBgn0031831	14.4044	0.357656	40.2746	1.62853	5.48507	7.77096
FBgn0015268	5.23576	0.130044	40.2616	209.881	464.475	269.656
FBgn0034198	18.0774	0.449451	40.2211	2.38518	4.60152	31.8071
FBgn0026777	4.91543	0.122221	40.2175	138.932	183.028	275.155
FBgn0025724	3.42961	0.0852953	40.2086	43.6963	61.0593	66.4528
FBgn0035132	3.27698	0.0815057	40.2056	7.47987	9.53004	11.3698
FBgn0261004	26.0627	0.648245	40.205	1.45123	0.174184	0.0757918
FBgn0085191	44.8262	1.11553	40.1837	0	0	1.64201
FBgn0034761	29.2661	0.728918	40.1501	9.64303	57.6321	403.234
FBgn0023513	8.69464	0.216625	40.1369	6.77779	8.20631	2.35185
FBgn0067864	3.57873	0.0892205	40.1111	30.5098	46.8264	47.436
FBgn0037750	14.9851	0.3737	40.0994	2.85986	0.919968	0.392219
FBgn0034996	16.3021	0.406585	40.0952	0.135583	0.567065	1.04829
FBgn0034788	3.21493	0.0803724	40.0005	57.4405	72.2715	89.8479
FBgn0038968	4.14144	0.103581	39.9825	5.06962	6.55335	3.28503
FBgn0038662	3.21321	0.0803656	39.9825	117.871	153.777	173.101
FBgn0031393	15.3354	0.383628	39.9746	16.8819	0.744686	4.94543
FBgn0010488	3.10469	0.077722	39.9461	171.681	247.218	231.23
FBgn0031106	4.98218	0.124968	39.8676	45.2011	57.9642	88.621
FBgn0037899	6.66565	0.16762	39.7663	518.881	1196.2	366.855
FBgn0267033	8.53299	0.214715	39.7411	76.3875	18.2923	60.3215
FBgn0015795	2.66297	0.067064	39.7079	218.559	263.815	295.276
FBgn0039385	2.78568	0.0701567	39.7066	24.4675	24.1384	15.9931
FBgn0036698	15.1615	0.382207	39.6682	1.42877	1.32945	0.175287
FBgn0034931	8.29649	0.20915	39.6676	1.21617	1.21907	4.3088
FBgn0035083	4.00018	0.100867	39.6578	167.252	293.852	231.223
FBgn0003607	3.3512	0.0845855	39.6192	146.664	82.3056	118.3
FBgn0031770	1.82104	0.0459675	39.6158	93.5769	109.114	130.207
FBgn0034989	2.6324	0.0664612	39.608	42.4328	56.3322	54.5541
FBgn0004132	7.25215	0.183105	39.6066	62.3749	66.5338	162.319
FBgn0035258	13.0283	0.32991	39.4906	0.213695	0.557028	1.67249
FBgn0026015	5.13112	0.129962	39.4816	24.323	32.883	46.164
FBgn0266452	3.53591	0.0895643	39.479	60.0543	82.3358	94.7461
FBgn0037714	10.0139	0.25371	39.4701	6.00937	25.1383	3.87366
FBgn0029870	1.76054	0.04462	39.4563	175.175	202.655	224.913
FBgn0032914	33.2505	0.843426	39.4232	1.38002	11.3758	0.179328
FBgn0031059	4.66615	0.118432	39.3994	39.0115	38.9587	20.0742
FBgn0026787	2.61975	0.0665242	39.3805	38.6144	45.1094	28.3702
FBgn0030418	5.69302	0.144675	39.3504	25.0957	45.1993	17.0461
FBgn0000346	2.39451	0.0608613	39.3437	707.932	922.305	874.712
FBgn0037578	4.15643	0.105709	39.3194	24.1194	15.4013	13.9566
FBgn0031157	32.9703	0.839322	39.282	3.85999	0.304239	0.0868917
FBgn0039465	8.91935	0.227199	39.2579	197.113	513.488	634.942
FBgn0030672	3.3621	0.0856829	39.2389	96.961	138.917	137.463
FBgn0004896	3.30543	0.0844087	39.1599	28.6815	37.8022	43.5068
FBgn0024182	7.52262	0.192108	39.1583	6.02175	18.2456	8.86461
FBgn0034246	3.83154	0.0979647	39.1114	13.3186	22.4825	16.9174
FBgn0043458	4.67366	0.11953	39.1004	89.0094	161.251	131.304
FBgn0032481	4.38209	0.112113	39.0864	13.781	20.2743	25.17
FBgn0042092	4.82892	0.123758	39.0189	6.22578	13.2125	8.20303
FBgn0034859	6.01388	0.154523	38.919	7.50286	17.8675	9.60152
FBgn0036423	12.7567	0.327859	38.909	1.32009	10.6434	3.92393
FBgn0050476	8.42492	0.217104	38.8059	52.6921	39.2215	145.192
FBgn0026150	4.03468	0.104145	38.7412	16.4981	16.7507	26.2605
FBgn0033461	6.83074	0.176555	38.689	1.37144	2.27702	3.87586
FBgn0035915	11.0367	0.285369	38.6752	2.19828	1.15376	7.64051
FBgn0034986	4.26964	0.110405	38.6726	49.2853	74.536	76.8123
FBgn0035405	2.53772	0.0656574	38.6509	25.1885	28.4032	35.2389
FBgn0030510	7.45926	0.193204	38.6083	99.6722	32.6269	47.0249
FBgn0086408	10.5584	0.273673	38.5805	9.57554	10.0369	2.6128
FBgn0051852	4.86025	0.12606	38.5551	25.4977	37.6422	45.0838
FBgn0035412	53.4351	1.38628	38.5457	0	0.539198	2.65717
FBgn0050001	22.0743	0.57421	38.4429	0.935042	0.431436	15.1351
FBgn0263397	4.12988	0.107444	38.4374	252.38	424.575	447.957
FBgn0039632	3.29579	0.0857522	38.4339	21.4039	25.4808	33.2969
FBgn0083992	16.9572	0.441393	38.4174	59.8317	3.62577	40.3939
FBgn0000152	9.90305	0.257869	38.4035	8.7768	5.83661	29.1576
FBgn0025639	2.71999	0.0709185	38.3538	79.9165	78.9746	119.97
FBgn0031882	3.02744	0.0789477	38.3474	40.3258	52.0669	59.8007
FBgn0032730	5.50135	0.143527	38.3296	2.06381	3.51799	4.58473
FBgn0052591	12.3485	0.322192	38.3267	0.754553	0.403538	3.00451
FBgn0028331	2.80029	0.0731745	38.2686	108.842	161.817	126.327
FBgn0001296	6.17451	0.161361	38.2651	27.4979	37.8609	13.8432
FBgn0027495	2.67203	0.069873	38.2412	22.8253	26.9462	32.8569
FBgn0027582	3.17802	0.0831246	38.232	21.1965	31.2651	26.5115
FBgn0000157	4.23613	0.110857	38.2125	16.4186	22.927	27.3715
FBgn0008636	3.29	0.0861478	38.1901	33.9361	49.8123	48.5515
FBgn0038334	27.5659	0.725214	38.0107	2.75282	0.1061	0.187886
FBgn0035981	3.76831	0.0991779	37.9955	52.7241	62.2417	89.753
FBgn0020545	3.70014	0.0974389	37.974	51.0906	74.3261	77.4501
FBgn0002552	5.60532	0.147851	37.9119	7.8769	8.53744	16.4585
FBgn0010314	5.47336	0.144405	37.9028	2.53752	5.77488	4.2487
FBgn0004050	2.2597	0.0596228	37.8999	44.8393	56.5303	36.739
FBgn0003209	2.86075	0.0755105	37.8854	36.4991	52.0105	51.3327
FBgn0030676	5.24371	0.138466	37.87	9.70498	11.896	21.4323
FBgn0054021	47.0841	1.2436	37.861	0	7.42395	0
FBgn0038741	5.41626	0.143118	37.8446	6.66266	3.18216	7.17628
FBgn0028375	4.43728	0.117252	37.8439	19.643	27.6963	34.3946
FBgn0024814	3.17423	0.0839452	37.8131	218.223	287.96	315.927
FBgn0265174	2.80414	0.0741602	37.8119	10.7145	13.9456	15.1934
FBgn0034362	3.53745	0.0936133	37.7879	21.8087	21.1896	35.01
FBgn0000499	3.51868	0.0932158	37.7476	40.9203	51.7124	66.3355
FBgn0023130	2.66327	0.0706735	37.6841	23.1225	27.8355	33.5588
FBgn0030891	2.96786	0.0787802	37.6727	22.5303	28.4439	33.636
FBgn0027592	2.59692	0.0689793	37.6477	22.3378	32.2983	28.0532
FBgn0001108	5.22771	0.139	37.6094	43.1613	73.0796	75.9024
FBgn0037980	3.82105	0.10161	37.6052	11.2501	15.1436	18.5391
FBgn0040212	4.191	0.111453	37.6034	31.2924	41.3984	52.8235
FBgn0001247	3.01231	0.0801227	37.5962	95.3829	103.365	145.095
FBgn0038901	59.4719	1.58223	37.5874	0	0	11.7881
FBgn0027575	3.50116	0.0931779	37.575	227.748	333.38	341.056
FBgn0087041	10.2991	0.274191	37.5618	14.2123	32.5499	46.2622
FBgn0032058	25.5645	0.680895	37.5455	0.104011	5.33841	0.339452
FBgn0027504	3.08797	0.0822729	37.5332	47.1936	60.4035	70.7401
FBgn0032013	2.62397	0.0699419	37.5164	124.289	184.312	147.403
FBgn0034945	3.69367	0.0984661	37.5121	24.9071	13.9708	23.1168
FBgn0263116	3.56671	0.0951621	37.4803	34.1447	52.4233	55.6685
FBgn0263873	2.24951	0.0600255	37.4758	52.924	65.7637	71.8403
FBgn0015789	3.31806	0.088639	37.4334	65.9361	98.7688	84.4685
FBgn0267978	3.57095	0.0956039	37.3515	53.3401	83.9228	81.2345
FBgn0028426	14.711	0.394103	37.3277	5.62766	13.3659	45.42
FBgn0039589	11.3199	0.303406	37.3093	13.4307	13.547	54.0402
FBgn0037913	9.43904	0.253138	37.2881	274.164	143.825	68.6862
FBgn0032700	3.5682	0.0956977	37.2861	27.1111	32.9082	45.3845
FBgn0026317	3.20292	0.0859305	37.2733	33.0408	43.8525	48.8662
FBgn0039016	3.60456	0.0967299	37.2641	5.69753	9.68839	7.09489
FBgn0037978	4.04671	0.10864	37.2489	58.6889	36.6371	68.8329
FBgn0042083	4.95047	0.133117	37.1888	4.8484	2.62761	6.30483
FBgn0034800	12.4381	0.334468	37.1878	1.53026	0.402253	0.390341
FBgn0266917	2.34773	0.0632739	37.1042	30.7634	33.6431	42.7565
FBgn0283536	2.73135	0.0736534	37.0839	1377.32	1061.17	1756.88
FBgn0031375	5.75652	0.155338	37.0581	25.2128	36.939	49.9466
FBgn0004864	3.95967	0.106902	37.0401	17.3223	24.9357	28.7352
FBgn0035877	2.95645	0.0798258	37.0363	46.6706	61.6987	70.9861
FBgn0037225	52.1268	1.40838	37.0119	18.6348	0.186145	0.0808017
FBgn0051632	2.66348	0.0720952	36.9439	2.55388	2.95606	4.02043
FBgn0036732	4.58877	0.124229	36.9379	25.273	19.4092	12.5528
FBgn0023169	3.13645	0.0849902	36.9037	140.733	186.077	204.931
FBgn0000246	11.0978	0.300841	36.8892	5.55935	14.7459	28.753
FBgn0030222	10.4528	0.283619	36.8552	0.283555	1.28878	0.752192
FBgn0029801	4.12765	0.112626	36.6492	83.3011	84.5835	141.704
FBgn0001491	3.76106	0.102751	36.6036	44.802	52.283	75.4269
FBgn0083981	5.15367	0.140866	36.5857	6.01558	9.74016	12.7772
FBgn0029094	4.39824	0.120374	36.5382	29.2007	30.6994	53.7529
FBgn0260639	4.9747	0.136151	36.538	46.6994	95.2329	52.3252
FBgn0040364	15.0299	0.411364	36.5368	13.6074	7.98024	85.5317
FBgn0040918	5.43928	0.149016	36.5014	70.2689	94.5938	138.175
FBgn0035372	4.88846	0.134026	36.4739	30.9518	57.7735	52.9269
FBgn0086265	30.7712	0.844445	36.4396	0.0381678	2.54426	0
FBgn0038564	4.2493	0.116717	36.4067	27.3588	34.6002	49.8968
FBgn0034910	34.9785	0.962633	36.3363	0.209033	1.00388	0
FBgn0031883	3.08273	0.0848826	36.3176	261.386	319.62	382.782
FBgn0029082	4.52392	0.124566	36.3174	16.2346	12.5614	28.9061
FBgn0000146	13.8219	0.380635	36.3129	1.67656	2.35427	0.297506
FBgn0034641	4.45621	0.122726	36.3103	14.385	21.2105	24.5765
FBgn0035120	7.13093	0.196399	36.3084	17.1755	11.1769	6.23264
FBgn0265574	1.36573	0.0376368	36.287	23.8105	28.1597	20.9254
FBgn0035102	4.83311	0.133493	36.205	27.6703	47.205	44.2965
FBgn0036144	4.37519	0.120989	36.1619	193.746	208.527	369.207
FBgn0051388	2.65818	0.073595	36.119	46.2444	62.9392	56.4451
FBgn0024314	5.62925	0.156043	36.0751	14.4936	17.0959	31.161
FBgn0023508	2.85975	0.0793832	36.0247	54.1632	61.8857	79.3498
FBgn0034731	4.90435	0.136161	36.0187	101.187	174.781	192.284
FBgn0038381	19.2784	0.535853	35.9771	10.6485	8.44512	0.964787
FBgn0028982	3.54078	0.0985152	35.9415	53.5968	60.3857	82.9456
FBgn0035077	12.4989	0.348001	35.9163	0.286647	0.933501	2.11328
FBgn0033716	5.1246	0.142936	35.8523	68.6363	62.7297	36.142
FBgn0033853	3.7595	0.104874	35.8477	35.6887	55.3402	53.0636
FBgn0053494	46.2084	1.28979	35.8263	2.30416	3.49633	0
FBgn0035528	2.6241	0.0732485	35.8246	130.06	171.738	174.282
FBgn0030946	3.4255	0.0956311	35.82	39.4752	64.0952	47.2566
FBgn0262116	3.41835	0.0954841	35.8002	703.304	716.626	1102.4
FBgn0036886	1.95822	0.0547493	35.7671	12.7203	10.9488	15.3255
FBgn0034327	27.3867	0.766493	35.73	1.27649	0.0186571	1.42196
FBgn0037408	3.43725	0.0963005	35.6929	15.5964	13.4597	23.0783
FBgn0005777	2.9453	0.0825446	35.6814	34.2454	37.9663	52.5078
FBgn0030559	4.26688	0.119634	35.6662	84.8445	104.767	154.442
FBgn0032419	14.9332	0.41917	35.6257	0.650366	4.08513	3.43582
FBgn0033358	6.34843	0.178247	35.616	497.243	567.745	223.939
FBgn0039617	2.75901	0.0775171	35.5923	77.8607	116.996	101.999
FBgn0032398	2.62336	0.0737438	35.574	97.9736	97.4778	65.9345
FBgn0033401	3.73268	0.105006	35.5473	26.0252	35.0233	42.2969
FBgn0031866	2.63067	0.0740842	35.5092	127.645	157.691	180.967
FBgn0259212	5.2008	0.146545	35.4894	48.6488	90.5908	84.7121
FBgn0038704	5.92307	0.166927	35.4831	39.0473	17.2276	49.6523
FBgn0034908	5.03105	0.141897	35.4556	11.026	22.3006	15.9976
FBgn0017418	3.70623	0.104538	35.4533	94.787	146.22	145.699
FBgn0037700	2.94645	0.0832572	35.3897	45.1005	59.3643	64.0563
FBgn0037202	4.73541	0.133937	35.3554	15.1745	18.5519	28.0045
FBgn0031865	12.3027	0.348145	35.3379	4.3616	2.45522	0.834675
FBgn0031050	4.81197	0.136189	35.3331	47.8962	103.627	50.2046
FBgn0036619	27.8406	0.788283	35.318	0.769741	15.4868	0.181793
FBgn0012058	2.35715	0.0667673	35.304	34.6557	39.9603	47.6336
FBgn0013987	1.89797	0.0538573	35.2407	82.1937	79.1429	104.073
FBgn0283680	8.55734	0.242913	35.2279	13.5248	39.4602	13.1595
FBgn0004598	2.29318	0.0650995	35.2257	75.6295	94.2708	100.494
FBgn0035050	6.73045	0.191132	35.2137	52.4661	108.123	125.593
FBgn0034796	23.4977	0.668214	35.1649	18.6178	17.7776	1.06401
FBgn0029874	4.41816	0.125657	35.1604	13.6867	19.8598	24.3915
FBgn0034145	3.83311	0.10906	35.1467	111.91	161.853	197.064
FBgn0035587	11.5226	0.327948	35.1353	0.605725	0.639584	2.76593
FBgn0267821	2.4585	0.0699794	35.1318	76.4495	76.2228	104.834
FBgn0033379	3.58066	0.101926	35.13	17.885	20.8297	28.7429
FBgn0038448	15.4475	0.439746	35.1283	0.5223	0.781589	4.0511
FBgn0031098	4.49742	0.128128	35.101	16.1156	21.9925	10.1736
FBgn0042094	3.71511	0.106006	35.0461	15.4597	23.1496	25.768
FBgn0030678	6.19034	0.176667	35.0395	6.40041	10.9445	14.7159
FBgn0019960	2.83716	0.0809787	35.0359	165.076	211.055	237.731
FBgn0004177	2.07531	0.0592586	35.0213	367.79	463.383	460.503
FBgn0027872	1.78936	0.0512865	34.8895	43.2756	48.3159	56.5737
FBgn0015299	9.88714	0.283502	34.875	88.4896	63.6538	24.8394
FBgn0028579	4.25791	0.122104	34.8712	76.8428	96.8327	139.294
FBgn0250907	23.6249	0.67981	34.7522	1.56682	0.100771	0.163764
FBgn0038772	4.13846	0.119247	34.7048	3.62317	5.98226	6.26723
FBgn0037993	4.01162	0.115636	34.6918	41.4905	50.077	73.0707
FBgn0037019	2.51734	0.0726033	34.6726	18.0988	23.3848	14.5596
FBgn0033915	2.09689	0.0605608	34.6245	103.071	129.91	130.922
FBgn0034497	15.4897	0.44745	34.6177	2.8885	3.3351	23.4454
FBgn0014184	2.8089	0.0812293	34.5799	1382.9	1253.53	919.855
FBgn0029763	3.13449	0.0907277	34.5483	20.207	25.8102	29.9935
FBgn0028471	2.86099	0.0828343	34.5387	51.0725	60.8003	74.3685
FBgn0027503	3.25354	0.094292	34.5049	20.7906	26.1633	32.8065
FBgn0021874	2.61763	0.0758638	34.5043	16.0705	24.4383	20.8659
FBgn0283468	3.06585	0.0888644	34.5003	75.7676	92.6091	111.51
FBgn0028697	3.31303	0.0960714	34.4851	2022.95	2190.02	3151.16
FBgn0038546	4.23622	0.122852	34.4822	60.6089	78.9444	107.122
FBgn0067629	4.62682	0.134233	34.4685	5.15948	8.03471	3.33589
FBgn0085263	23.9961	0.697362	34.4098	11.4144	0.739911	38.9567
FBgn0038080	4.72561	0.137584	34.3472	49.5137	75.9301	33.5745
FBgn0033724	25.3066	0.736797	34.3468	0.519501	1.07631	0.0432819
FBgn0030096	6.21797	0.18113	34.3287	14.8398	31.824	26.5962
FBgn0032456	5.08392	0.148165	34.3125	44.8921	47.39	100.082
FBgn0036248	4.08205	0.119017	34.298	28.2805	28.8445	50.2896
FBgn0033160	2.46556	0.071898	34.2925	44.5817	56.1541	59.792
FBgn0025571	3.48479	0.101632	34.2885	137.007	181.355	194.764
FBgn0015527	3.61384	0.105397	34.2879	22.5282	31.9073	37.2257
FBgn0025186	3.32735	0.0970558	34.2829	32.7969	51.2706	40.3866
FBgn0033607	2.61174	0.0762307	34.261	26.0662	26.3844	36.9542
FBgn0030961	2.25777	0.0659075	34.2567	43.828	54.4648	58.5766
FBgn0029161	4.27353	0.124753	34.2558	125.108	242.753	140.929
FBgn0014133	3.36781	0.0983279	34.2508	42.761	51.8376	71.2151
FBgn0001123	3.18973	0.0931683	34.2362	248.74	336.403	380.218
FBgn0034114	9.53213	0.278612	34.2129	10.156	57.6348	17.0921
FBgn0033244	3.08669	0.0903264	34.1726	157.098	187.423	239.704
FBgn0015396	6.09109	0.178356	34.1514	6.8408	8.4952	3.04977
FBgn0035270	4.12422	0.120788	34.1441	43.6712	65.2778	72.9546
FBgn0052707	3.93582	0.115277	34.1422	10.7257	12.4758	17.3267
FBgn0039270	4.4165	0.129544	34.0927	19.6524	25.7035	33.5355
FBgn0024689	2.86673	0.0840955	34.089	36.7844	35.0473	51.5437
FBgn0002917	3.34005	0.0980069	34.0798	129.394	136.185	204.997
FBgn0033065	44.1278	1.29492	34.0777	67.4339	19.1901	0.33234
FBgn0029131	4.48319	0.13157	34.0746	14.3498	25.1958	11.4949
FBgn0031128	42.5586	1.24942	34.0627	0	1.12627	0
FBgn0032485	3.83087	0.112528	34.0436	59.9527	74.1778	99.0356
FBgn0262519	3.61484	0.10631	34.0028	64.3058	83.925	101.67
FBgn0000416	2.17383	0.0639377	33.9992	250.145	334.262	300.5
FBgn0051174	42.2405	1.24255	33.995	8.6504	0.683831	0.0503849
FBgn0015625	14.6092	0.429991	33.9757	0.766152	0.243322	2.84848
FBgn0030406	6.36094	0.187387	33.9455	43.6372	18.213	45.7195
FBgn0004514	2.71529	0.0800095	33.9371	30.1713	41.5317	41.3126
FBgn0030266	3.18742	0.0939343	33.9325	29.6556	44.2696	42.5354
FBgn0038787	3.1321	0.0923279	33.9237	27.7001	37.7366	41.1204
FBgn0052237	51.9862	1.53522	33.8623	0	1.12807	0.0480885
FBgn0039269	2.7795	0.0821991	33.8142	187.868	262.622	249.269
FBgn0005696	14.1859	0.419657	33.8035	1.47958	0.217683	2.44913
FBgn0031359	4.33611	0.128374	33.7772	65.7842	96.1196	118.684
FBgn0043900	2.1616	0.064064	33.7412	23.3656	30.269	28.7082
FBgn0250785	4.91163	0.145693	33.7122	61.8074	83.6434	116.221
FBgn0028434	10.4701	0.31076	33.6918	6.2134	7.05985	25.5681
FBgn0038961	1.37108	0.0407052	33.683	46.5793	56.1905	52.1331
FBgn0036759	10.9914	0.326442	33.6704	7.80844	31.9533	22.0581
FBgn0085396	9.04886	0.268771	33.6675	34.5765	14.1399	10.6452
FBgn0261986	4.12103	0.122499	33.6414	55.2967	90.2362	86.3242
FBgn0032850	10.7798	0.320814	33.6014	3.11036	3.24556	13.9519
FBgn0028664	4.10727	0.122326	33.5764	17.0396	11.5342	9.51697
FBgn0026400	3.28203	0.097819	33.5521	32.0858	47.7253	45.6675
FBgn0261786	2.65302	0.0791151	33.5336	13.8191	15.4936	20.162
FBgn0029664	4.21889	0.125981	33.4884	45.3517	42.7485	81.4022
FBgn0261848	25.0685	0.748619	33.4863	0.0846738	0.585872	3.74907
FBgn0001222	2.82673	0.084421	33.4837	71.5658	92.6314	97.3411
FBgn0031008	4.52988	0.135343	33.4695	14.8095	23.6789	24.7752
FBgn0032295	3.99987	0.119651	33.4293	39.6142	59.4549	61.1445
FBgn0011741	4.73864	0.141777	33.4232	29.3247	33.9463	17.3639
FBgn0024179	2.99378	0.0896493	33.3944	53.3577	73.8015	74.5681
FBgn0025802	2.9231	0.0875345	33.3938	33.0631	42.3877	44.9052
FBgn0039631	4.32662	0.129746	33.3469	10.6296	13.6758	18.7162
FBgn0039773	3.23756	0.0973155	33.2687	25.7123	37.8161	37.7876
FBgn0034151	24.9052	0.750654	33.1781	0.282625	0.131133	3.11941
FBgn0040371	46.027	1.38752	33.1721	1.34643	11.0911	0
FBgn0037655	1.92854	0.0581531	33.1631	125.759	150.113	165.698
FBgn0030869	3.54485	0.10706	33.111	53.4808	63.3005	88.9091
FBgn0263929	2.44435	0.0738548	33.0967	48.6035	51.7719	67.7935
FBgn0027561	2.74075	0.0828294	33.0891	73.9069	99.9169	95.1906
FBgn0043012	2.77086	0.0837715	33.0764	251.897	285.744	363.811
FBgn0030286	3.63835	0.110063	33.057	71.6043	114.959	104.518
FBgn0002283	3.72342	0.112933	32.9702	43.3393	68.9637	63.8675
FBgn0035082	4.77647	0.144945	32.9538	35.9202	30.7279	67.9914
FBgn0034118	3.78484	0.114878	32.9467	27.8805	47.33	38.7638
FBgn0028856	16.9309	0.513898	32.946	0.235345	0.46322	2.50295
FBgn0051547	14.2413	0.433341	32.864	35.202	23.0509	5.34811
FBgn0010398	2.36024	0.0718452	32.8517	9.51862	12.8409	8.1567
FBgn0028538	2.63704	0.080281	32.8476	39.2274	47.0016	54.4725
FBgn0050496	5.16241	0.157283	32.8225	4.81634	10.2369	7.20131
FBgn0038541	8.36201	0.254847	32.8118	1.51984	1.60396	4.48563
FBgn0264753	3.92744	0.119709	32.8083	67.2035	69.9118	39.079
FBgn0034231	6.1283	0.186824	32.8026	15.8148	17.2129	36.4834
FBgn0028690	2.66775	0.0813376	32.7985	67.3524	91.5347	80.2052
FBgn0067622	7.53862	0.2299	32.7909	27.0147	15.1759	65.7627
FBgn0031702	7.51121	0.229085	32.7879	25.6374	47.3613	69.9904
FBgn0051223	5.7326	0.174999	32.7579	11.9021	13.0527	26.0333
FBgn0035713	2.96719	0.0907063	32.7121	47.3128	55.3009	72.2046
FBgn0261647	4.31958	0.132203	32.6739	27.7869	39.0765	46.0542
FBgn0003742	2.78388	0.0852098	32.6708	38.0534	57.7278	41.5772
FBgn0050290	32.4603	0.994014	32.6558	0.669542	33.1388	33.0391
FBgn0028487	3.71412	0.113805	32.6358	47.9419	62.2468	76.3166
FBgn0024945	5.54911	0.170059	32.6304	21.4007	38.7346	36.7021
FBgn0050273	44.7134	1.37397	32.5431	0.00317498	2.13542	0.972685
FBgn0051357	3.24307	0.0997962	32.4969	48.5293	70.79	67.3357
FBgn0027841	4.40891	0.135711	32.4874	10.9079	15.8881	20.0723
FBgn0023216	4.25652	0.131344	32.4074	17.6388	28.4373	26.199
FBgn0003319	26.8302	0.828309	32.3915	0.0640431	4.13407	1.18689
FBgn0029820	2.82337	0.0872076	32.3753	80.0232	112.365	109.098
FBgn0037950	7.89104	0.243821	32.364	7.26289	24.3943	12.3174
FBgn0031042	33.979	1.04998	32.3616	0.424166	0.000620278	6.05476
FBgn0051522	3.60071	0.111346	32.3382	98.0968	61.5316	137.359
FBgn0033902	2.18632	0.0677921	32.2504	314.26	380.3	238.197
FBgn0038499	4.17825	0.129757	32.2006	22.6569	19.9604	13.6169
FBgn0037279	2.27611	0.0706878	32.1995	28.7944	35.9942	39.1362
FBgn0010415	4.90583	0.152667	32.1343	323.636	393.152	649.64
FBgn0004507	2.92433	0.091373	32.0044	259.494	297.29	381.439
FBgn0039945	13.2178	0.413102	31.9966	6.70429	43.4786	31.709
FBgn0033347	1.65969	0.0519075	31.974	86.1682	92.3347	69.9467
FBgn0051798	11.0788	0.346992	31.9282	3.32118	2.3021	0.678228
FBgn0036052	2.57796	0.0807565	31.9226	27.5207	36.7183	38.4638
FBgn0051108	3.1001	0.0971362	31.915	34.0625	48.9235	44.5716
FBgn0010348	2.7819	0.0871981	31.9032	392.312	497.878	546.921
FBgn0266450	4.37926	0.137283	31.8996	48.1506	75.8046	89.525
FBgn0263237	3.09383	0.0970571	31.8764	19.3098	21.3433	29.0507
FBgn0039104	21.9836	0.68972	31.8732	0.477678	10.0133	0.571769
FBgn0037142	3.95452	0.124092	31.8675	51.7543	86.1735	83.1772
FBgn0037656	4.49545	0.141171	31.844	12.2403	15.0379	7.11019
FBgn0038975	2.78439	0.0875343	31.8091	201.777	313.114	258.849
FBgn0016061	4.04547	0.127275	31.7853	54.7459	74.5729	96.7404
FBgn0051860	11.9856	0.377317	31.7654	2.00563	4.20098	12.1366
FBgn0000426	5.34602	0.168326	31.7599	19.6948	28.0331	40.5371
FBgn0026741	3.84144	0.12105	31.7343	54.8395	72.9782	87.8993
FBgn0036397	5.97059	0.188144	31.7342	24.0768	46.654	51.0745
FBgn0260959	7.62312	0.240436	31.7053	3.58193	2.52022	1.22321
FBgn0030056	4.19591	0.132514	31.6639	34.0927	51.1395	58.2664
FBgn0035138	14.1817	0.448085	31.6495	1.51564	12.8956	2.88712
FBgn0045495	3.58896	0.113522	31.6146	3.52698	5.20594	6.04219
FBgn0003510	8.80433	0.278674	31.5937	1.82298	6.73747	2.20764
FBgn0031683	2.56825	0.0813343	31.5765	259.456	297.347	365.711
FBgn0035153	5.59261	0.177114	31.5763	20.8234	30.3904	48.1037
FBgn0270927	4.09417	0.12987	31.5251	19.6804	9.81821	18.5733
FBgn0035975	8.71891	0.276763	31.5032	25.7486	26.4869	9.44339
FBgn0262736	2.1569	0.0685447	31.467	1124.32	1358.86	1442.02
FBgn0034629	17.5018	0.55627	31.4628	1.37807	0.655634	0.189932
FBgn0025625	3.40191	0.108212	31.4375	44.9058	61.5025	69.8222
FBgn0039116	3.34028	0.106262	31.4342	51.6112	65.982	81.6846
FBgn0003134	3.01325	0.0959034	31.4196	182.559	181.871	277.804
FBgn0035947	4.75341	0.151299	31.4173	23.0586	45.1793	34.7484
FBgn0003308	9.10244	0.289943	31.3939	10.6576	3.88862	4.00056
FBgn0034893	4.22624	0.134648	31.3874	41.7019	73.7419	67.3137
FBgn0027363	3.93696	0.125534	31.3617	47.9058	70.0553	77.5569
FBgn0037623	3.23371	0.1032	31.3344	39.03	34.1317	60.6797
FBgn0013762	4.13153	0.13187	31.3303	36.8479	57.0553	60.654
FBgn0266284	3.91598	0.125015	31.324	19.6617	31.9599	30.8168
FBgn0003459	3.9538	0.126253	31.3165	6.21087	12.4749	7.96476
FBgn0028932	3.71535	0.118643	31.3153	23.539	35.911	34.5424
FBgn0030949	5.8415	0.186721	31.2847	2.05023	4.2614	1.42268
FBgn0033985	14.4187	0.460945	31.2807	23.966	96.1151	162.759
FBgn0035906	3.03638	0.0972113	31.2349	69.6667	87.5306	102.891
FBgn0019662	1.91521	0.0613416	31.222	120.337	134.213	154.344
FBgn0261014	2.72086	0.0871762	31.2111	108.384	140.271	152.744
FBgn0030574	1.56823	0.0502491	31.2091	139.918	167.082	182.738
FBgn0036380	13.3279	0.427268	31.1933	1.24865	1.1421	0.195079
FBgn0030456	7.50963	0.241058	31.1527	7.04191	14.7046	10.9783
FBgn0038818	5.32561	0.171099	31.1259	138.421	129.137	268.894
FBgn0015799	3.00213	0.096492	31.1128	32.4775	46.977	45.8981
FBgn0035715	3.00382	0.0965585	31.1088	73.9153	84.0673	112.33
FBgn0031240	13.4104	0.431084	31.1085	5.05124	1.27088	1.02762
FBgn0262018	6.46833	0.208079	31.086	28.4483	55.062	63.8219
FBgn0030645	3.55603	0.114471	31.0649	15.1637	16.2617	8.94991
FBgn0034214	3.20519	0.10318	31.0641	11.5639	14.4384	18.0283
FBgn0013272	5.20594	0.16765	31.0524	28.1323	44.3318	52.6616
FBgn0037902	3.80051	0.122496	31.0256	113.955	191.63	173.716
FBgn0052831	2.62639	0.0846715	31.0186	18.5574	24.7278	26.0288
FBgn0039044	6.16482	0.198752	31.0177	11.0039	6.32731	16.5251
FBgn0000370	2.63877	0.0851171	31.0017	490.691	714.489	491.378
FBgn0010217	2.88146	0.0930121	30.9794	2252.1	2877.48	3145.24
FBgn0035151	24.4218	0.78869	30.965	0.381554	7.03845	5.54917
FBgn0262515	2.90778	0.0940283	30.9246	311.949	372.036	440.835
FBgn0033581	2.64215	0.085553	30.8832	44.5065	57.6177	60.0641
FBgn0032402	5.86589	0.190006	30.8721	284.731	320.874	139.721
FBgn0031986	6.24603	0.202352	30.8671	7.67111	5.70358	3.52648
FBgn0038651	3.16015	0.102426	30.8531	15.3749	18.6139	25.1255
FBgn0034644	3.90778	0.126755	30.8294	384.09	528.492	660.736
FBgn0030686	3.49213	0.113318	30.8172	59.8291	68.4519	93.2519
FBgn0004108	3.11435	0.101124	30.7973	39.1294	41.7396	60.46
FBgn0265512	4.33998	0.140971	30.7864	265.532	230.116	141.169
FBgn0022960	4.46696	0.145156	30.7735	32.6799	47.3854	58.1164
FBgn0037482	2.18272	0.0709842	30.7493	23.5153	29.5489	30.2152
FBgn0026666	3.54559	0.115328	30.7434	155.963	188.785	258.178
FBgn0033233	3.53254	0.114927	30.7373	15.5517	19.9691	25.4388
FBgn0259241	4.51755	0.147057	30.7196	72.1563	62.4433	123.051
FBgn0033687	7.80048	0.253992	30.7115	7.84665	2.25005	5.22615
FBgn0027779	2.54106	0.0828411	30.6739	324.527	340.419	439.444
FBgn0260747	4.32501	0.141188	30.633	443.937	351.395	750.549
FBgn0000533	19.3439	0.632362	30.5899	4.17169	0.859068	0.415052
FBgn0030859	42.0958	1.37679	30.5753	0.232856	0.0983953	34.9282
FBgn0004636	2.46527	0.0806473	30.5686	109.516	150.287	145.158
FBgn0031801	23.2177	0.75988	30.5545	5.74177	15.5862	159.981
FBgn0031474	2.70755	0.0886228	30.5514	117.174	157.748	158.7
FBgn0036278	3.36835	0.110297	30.5389	11.2147	15.4042	16.8229
FBgn0010380	3.06311	0.100356	30.5225	170.503	238.208	260.54
FBgn0086348	15.0246	0.492325	30.5175	0.795049	6.32941	3.68391
FBgn0039911	2.90709	0.0952654	30.5157	431.98	555.867	337.839
FBgn0032744	2.17107	0.0711679	30.5063	44.518	47.0802	60.607
FBgn0023212	2.36265	0.0774683	30.4982	116.314	134.993	158.756
FBgn0003008	2.95087	0.0968092	30.4814	44.1989	47.0822	67.2189
FBgn0029857	4.18357	0.137363	30.4563	34.5171	37.53	61.7261
FBgn0003655	53.1728	1.74829	30.4142	0.0629492	11.6296	13.9055
FBgn0038586	6.08289	0.200078	30.4026	18.3676	18.5484	40.9134
FBgn0010602	2.89156	0.0951131	30.4013	158.394	208.579	229.326
FBgn0086758	10.2765	0.338228	30.3835	58.5139	12.6538	17.7716
FBgn0052391	49.6048	1.63316	30.3734	0	0.463105	2.00809
FBgn0030025	3.64891	0.120146	30.3705	13.9924	10.4292	20.9603
FBgn0050178	10.3466	0.340962	30.3454	4.38419	2.11276	12.8602
FBgn0033266	3.16056	0.104366	30.2833	48.282	69.8747	71.2944
FBgn0050493	3.25911	0.107984	30.1813	20.1864	25.2097	30.6239
FBgn0035134	5.69822	0.18887	30.17	25.4081	10.0923	17.7759
FBgn0038597	6.13661	0.203447	30.1631	8.15243	15.7974	17.0226
FBgn0039854	2.58008	0.0856325	30.1297	67.9739	87.9985	54.4907
FBgn0027794	4.99067	0.165903	30.0818	30.295	32.6731	15.7928
FBgn0038803	4.54564	0.151185	30.0668	65.3978	35.4739	42.0145
FBgn0032059	1.94794	0.0648089	30.0566	83.3312	88.262	115.61
FBgn0035146	3.98141	0.132489	30.0508	32.4058	57.8045	46.0952
FBgn0036333	3.4011	0.113312	30.0152	39.4134	26.968	24.0339
FBgn0027513	9.35608	0.311724	30.014	2.92187	3.47101	10.4845
FBgn0032117	6.61951	0.22061	30.0054	10.185	9.36906	4.08125
FBgn0033195	5.96914	0.199202	29.9652	5.74953	2.50651	7.4481
FBgn0050467	3.20221	0.106872	29.9632	16.7491	23.3832	25.161
FBgn0263006	3.0802	0.102824	29.9561	120.739	164.612	176.166
FBgn0005671	3.01392	0.100615	29.955	574.811	585.898	882.528
FBgn0038087	7.4301	0.248058	29.9531	59.5491	15.2965	56.0423
FBgn0030997	2.80854	0.0937767	29.9492	169.59	263.108	187.83
FBgn0025692	17.9624	0.601002	29.8874	1.30594	13.837	9.24715
FBgn0016070	3.81622	0.127841	29.8514	29.502	44.1065	46.8488
FBgn0025641	2.50834	0.0840667	29.8375	66.4839	97.9896	67.1735
FBgn0067779	7.96082	0.266887	29.8285	29.5337	26.1831	9.47623
FBgn0259173	4.44018	0.148949	29.81	56.8063	63.9458	108.643
FBgn0001112	20.4116	0.685861	29.7605	1.29883	0.206341	0.113215
FBgn0035435	5.79055	0.194719	29.738	5.27941	9.92736	8.89177
FBgn0083986	2.96298	0.0996371	29.7377	57.3602	86.53	63.8709
FBgn0038519	5.50849	0.185312	29.7255	93.2989	154.25	192.617
FBgn0040388	7.16755	0.241208	29.7152	2.11416	2.68699	5.53359
FBgn0029502	5.08138	0.171189	29.6829	109.867	103.257	52.8964
FBgn0014189	3.03928	0.102581	29.6282	84.0867	86.7651	127.33
FBgn0033391	11.4609	0.38688	29.624	57.248	171.878	174.329
FBgn0031250	13.5879	0.458873	29.6115	19.714	131.987	23.8435
FBgn0017430	5.51868	0.186795	29.544	36.8324	70.7166	75.0305
FBgn0040283	3.32681	0.112632	29.5371	39.9846	49.9642	60.9705
FBgn0014340	4.60942	0.156083	29.5319	8.06748	10.4908	15.1815
FBgn0015794	2.64494	0.0895702	29.5292	88.7935	135.454	104.574
FBgn0023167	4.39049	0.148758	29.5143	22.1721	32.4175	40.6427
FBgn0261020	4.19225	0.142069	29.5086	33.5889	46.6868	58.5563
FBgn0261985	3.2331	0.109565	29.5084	67.7991	107.335	84.4302
FBgn0267408	12.0328	0.407929	29.4972	14.0498	8.48547	2.72591
FBgn0052708	4.77122	0.161813	29.4861	19.4049	37.0286	23.9823
FBgn0027599	1.64816	0.0559138	29.4768	36.8759	33.7199	45.4572
FBgn0016038	3.1561	0.107147	29.4558	51.7486	81.7162	67.728
FBgn0038816	5.23455	0.177927	29.4196	33.7134	39.77	64.6786
FBgn0027581	6.92986	0.235715	29.3993	92.4538	209.639	197.296
FBgn0260789	3.29181	0.112079	29.3704	9.51441	14.8711	14.3064
FBgn0004055	4.22585	0.143921	29.3623	304.569	331.049	519.351
FBgn0035244	3.78248	0.128847	29.3565	87.4781	96.4687	143.296
FBgn0033428	4.05233	0.138288	29.3035	76.12	58.4528	112.698
FBgn0030460	5.28676	0.180422	29.3022	18.4368	15.0382	35.6997
FBgn0014388	3.86089	0.131783	29.2973	87.9222	114.226	148.916
FBgn0039358	3.07756	0.105176	29.2611	318.438	440.862	461.627
FBgn0034408	2.94421	0.100764	29.2189	24.9207	35.6787	36.4961
FBgn0004913	4.25196	0.145533	29.2164	22.5361	27.5991	38.6888
FBgn0030003	2.19158	0.075197	29.1445	16.0656	22.7115	20.7388
FBgn0030759	5.1381	0.176402	29.1273	8.25582	18.5376	9.3012
FBgn0262477	7.69599	0.264324	29.1157	179.033	337.45	490.812
FBgn0014006	3.61114	0.124071	29.1055	19.6209	28.4675	31.0237
FBgn0026149	3.50938	0.12077	29.0585	16.7051	21.3863	27.825
FBgn0022935	2.93624	0.101148	29.0291	30.5653	47.6859	39.2354
FBgn0031876	7.78347	0.268159	29.0255	7.61512	5.85537	2.83636
FBgn0026433	3.66697	0.126369	29.0179	9.20434	15.0572	11.5925
FBgn0029751	34.6112	1.19512	28.9605	0	0	1.55007
FBgn0024273	3.43397	0.118655	28.9407	58.429	82.784	81.6923
FBgn0027082	6.30403	0.217859	28.9363	14.7317	19.9598	34.9369
FBgn0086362	3.73157	0.128969	28.9338	26.8153	40.7044	37.0565
FBgn0033616	3.15117	0.109022	28.9041	19.8438	30.6807	29.8031
FBgn0003386	7.70451	0.26663	28.8959	75.0774	153.603	207.725
FBgn0016641	3.83811	0.132868	28.8865	61.6762	96.8022	97.8595
FBgn0003557	2.03803	0.0706134	28.8618	71.6595	83.738	92.148
FBgn0040319	5.43011	0.188245	28.846	68.8811	109.652	125.347
FBgn0038129	3.46829	0.120236	28.8457	16.2236	26.8925	21.9599
FBgn0029730	12.129	0.420616	28.8362	1.7485	0.261986	1.02086
FBgn0036257	2.38883	0.0828433	28.8355	81.5242	106.555	101.724
FBgn0039609	4.2695	0.148138	28.8211	50.3578	72.0155	89.4707
FBgn0025463	2.69133	0.0935324	28.7743	44.6438	55.3227	64.1244
FBgn0250838	3.72656	0.129592	28.7561	579.509	935.127	828.693
FBgn0037922	3.61173	0.125602	28.7552	19.9518	30.971	30.1865
FBgn0032845	3.84161	0.133607	28.7532	33.7249	30.1029	18.6521
FBgn0030734	2.45271	0.0853112	28.7502	93.7924	112.971	124.555
FBgn0264598	3.64771	0.12694	28.7356	65.7109	94.668	112.971
FBgn0025637	2.13134	0.0741791	28.7324	287.172	389.789	305.036
FBgn0030584	3.32574	0.116045	28.6591	109.347	181.722	145.196
FBgn0034937	6.49397	0.226682	28.6479	1.77685	3.8544	3.35968
FBgn0001965	2.26763	0.0791798	28.639	54.4884	68.0204	73.44
FBgn0086707	4.22499	0.147598	28.625	17.9663	28.5984	28.7628
FBgn0004432	3.98355	0.139174	28.6228	740.366	1272.22	971.717
FBgn0031217	1.7177	0.0600123	28.6225	52.0842	57.5378	65.4308
FBgn0260442	4.32667	0.15118	28.6194	88.8338	131.656	166.711
FBgn0051374	8.63388	0.30182	28.6061	4.88052	1.7725	8.229
FBgn0052110	9.96853	0.348497	28.6044	0.490649	2.50171	0.419615
FBgn0034617	4.48894	0.156942	28.6026	7.59436	6.49905	4.01108
FBgn0027359	3.46195	0.121066	28.5956	114.604	77.614	74.7803
FBgn0035047	2.90694	0.101687	28.587	24.8972	34.9656	22.705
FBgn0015797	1.33385	0.0466683	28.5815	42.978	51.2855	49.2928
FBgn0039065	4.05759	0.141978	28.579	28.6967	26.5367	15.5169
FBgn0052536	5.86545	0.205257	28.5761	11.2281	19.8487	23.2384
FBgn0250788	2.63845	0.0923348	28.5748	308.235	375.185	402.383
FBgn0032586	2.28962	0.0802284	28.5388	202.32	170.458	256.758
FBgn0039623	1.66231	0.0582883	28.5187	35.1289	44.3054	40.9642
FBgn0037911	5.75323	0.201903	28.4951	16.2222	17.4085	34.3453
FBgn0263605	5.02269	0.176513	28.4551	8.34725	13.3287	16.9318
FBgn0036710	3.91807	0.137767	28.4399	7.70422	12.4182	12.3791
FBgn0003499	10.9201	0.384104	28.43	40.1807	18.3224	7.24373
FBgn0023523	15.1038	0.532418	28.3683	0.648674	1.04725	6.03532
FBgn0011566	4.16882	0.146973	28.3645	21.3169	36.8166	36.4129
FBgn0037712	15.8692	0.559553	28.3605	15.1525	6.07036	1.69772
FBgn0086778	6.34495	0.224108	28.3121	179.514	302.25	389.759
FBgn0030638	3.91861	0.138458	28.3018	14.0351	26.2557	18.9425
FBgn0031717	8.86432	0.313221	28.3006	33.2397	25.9658	10.2216
FBgn0037943	3.2975	0.116607	28.2789	37.2902	31.4296	23.0616
FBgn0032153	4.34675	0.153804	28.2616	11.2176	20.1898	18.8879
FBgn0250848	4.65826	0.164875	28.2533	118.004	212.647	177.393
FBgn0003464	2.69855	0.0955885	28.231	79.6501	69.7092	108.864
FBgn0051694	2.75461	0.0976188	28.218	100.314	132.871	138.016
FBgn0033079	10.9581	0.388654	28.1951	3.26849	8.10509	13.9167
FBgn0085470	45.0245	1.59778	28.1794	1.61743	0	36.7497
FBgn0030697	41.989	1.49122	28.1574	0	1.60381	0.198227
FBgn0003638	2.78539	0.099046	28.1222	282.94	436.687	355.172
FBgn0003889	20.8095	0.74025	28.1115	3.01463	24.9423	24.0579
FBgn0267967	46.7243	1.66303	28.0959	0	1.03495	0.859163
FBgn0002863	33.1881	1.18185	28.0816	0.159978	17.4681	1.76691
FBgn0035581	28.2321	1.00541	28.0801	0.137531	3.73763	0.606196
FBgn0028684	4.01219	0.142946	28.0678	55.7576	71.0117	93.4549
FBgn0031774	3.6582	0.13039	28.0558	26.3684	42.1534	23.7945
FBgn0035996	6.04773	0.215591	28.0519	3.76113	9.96519	4.50391
FBgn0265190	3.9124	0.139634	28.0189	30.2857	45.3274	48.3786
FBgn0035890	5.33091	0.190261	28.0189	6.02352	4.95623	2.89941
FBgn0262126	0.806489	0.0287967	28.0063	42.119	41.966	52.5706
FBgn0015818	2.82764	0.100969	28.0051	16.3875	21.8686	23.099
FBgn0037717	3.80101	0.135787	27.9924	56.4118	86.6784	77.3559
FBgn0030653	19.4833	0.696323	27.9803	4.28808	2.16556	0.256309
FBgn0000579	8.29542	0.296548	27.9732	134.745	1197.79	1439.76
FBgn0050295	8.69295	0.310904	27.9602	1.94923	7.27417	2.25055
FBgn0034878	4.33359	0.155033	27.9527	25.1792	42.0389	41.254
FBgn0005561	8.36563	0.299377	27.9434	5.22542	9.67441	15.6983
FBgn0030067	5.83976	0.209069	27.9321	8.55678	14.7654	17.5691
FBgn0028484	2.29498	0.0821958	27.9209	44.1253	48.94	60.0083
FBgn0283509	2.23995	0.0802423	27.9149	300.942	395.243	391.931
FBgn0036258	6.72359	0.241071	27.8905	314.356	180.129	163.223
FBgn0037660	2.82754	0.101393	27.8868	37.4111	50.2146	53.7225
FBgn0030041	7.95216	0.285158	27.8868	11.0681	20.8782	4.7727
FBgn0030518	3.4573	0.123998	27.882	12.7197	11.4278	20.7734
FBgn0033783	1.41552	0.0507939	27.868	48.7318	59.8153	54.1419
FBgn0004619	2.95566	0.106212	27.8278	66.5623	90.3786	100.207
FBgn0085257	4.56754	0.164202	27.8165	53.7312	30.6145	78.7455
FBgn0028978	5.81221	0.209084	27.7985	2.28556	5.15914	4.07944
FBgn0061515	1.61125	0.0579643	27.7973	183.121	218.397	226.648
FBgn0030352	3.50732	0.126176	27.797	31.6904	54.6657	38.4667
FBgn0027567	3.30854	0.119066	27.7873	239.25	315.586	375.316
FBgn0038235	4.15074	0.149432	27.7767	13.0865	22.9364	10.5259
FBgn0031100	3.32823	0.119826	27.7755	7.85272	8.62655	13.0744
FBgn0038326	3.03785	0.10939	27.7709	36.365	44.9625	56.1512
FBgn0033480	4.51237	0.162528	27.7637	51.2207	58.8972	96.7591
FBgn0053203	6.04077	0.217623	27.758	91.9368	150.297	184.929
FBgn0004512	15.0849	0.543687	27.7457	42.1945	25.2117	6.16202
FBgn0032006	8.43117	0.304208	27.7151	10.7693	24.5034	30.142
FBgn0051720	20.8095	0.75185	27.6777	0.776868	0.0890154	1.35968
FBgn0004870	2.79967	0.101232	27.6559	12.0598	10.3218	17.2286
FBgn0031999	16.2345	0.587026	27.6555	0.840468	4.03542	7.7238
FBgn0036489	3.68442	0.13324	27.6526	15.7722	24.4821	24.2318
FBgn0028481	4.01612	0.145305	27.6393	171.556	208.392	288.064
FBgn0260858	2.86024	0.103494	27.6368	57.3195	77.3199	78.1187
FBgn0001308	2.47891	0.0897549	27.6186	87.2764	109.404	114.643
FBgn0030838	3.48908	0.126439	27.5951	66.822	74.46	43.1098
FBgn0033380	3.24028	0.117452	27.5882	19.5348	24.2442	31.0603
FBgn0053696	4.02068	0.145804	27.5759	32.9473	52.1607	53.265
FBgn0030121	3.59971	0.130574	27.5684	19.6074	34.8773	20.7769
FBgn0263998	6.01895	0.218784	27.5109	50.2582	24.5783	20.7654
FBgn0263260	5.69713	0.207163	27.5008	21.2173	15.6754	44.1719
FBgn0038387	2.71914	0.0988956	27.495	39.8036	52.2724	56.7321
FBgn0035333	2.76925	0.100771	27.4807	175.69	163.076	246.821
FBgn0035855	14.5022	0.528299	27.4508	4.53629	2.62223	0.651784
FBgn0035171	3.89654	0.142025	27.4355	113.014	162.208	193.413
FBgn0010909	4.09224	0.149272	27.4146	58.0274	94.2863	86.3302
FBgn0031048	4.66189	0.170161	27.397	93.0481	170.505	150.693
FBgn0011286	6.21888	0.227012	27.3945	40.0799	84.9038	79.1769
FBgn0036340	2.68702	0.098108	27.3884	55.5491	75.8728	72.4917
FBgn0262511	3.67698	0.134254	27.3882	354.991	444.106	603.349
FBgn0014380	8.93867	0.326417	27.3842	15.7019	26.9863	55.8745
FBgn0028969	2.49486	0.0911478	27.3716	71.3893	92.2207	96.7252
FBgn0033100	4.13706	0.151208	27.36	57.9829	36.5782	34.1963
FBgn0032076	7.062	0.258191	27.3518	8.43479	13.1101	4.05974
FBgn0045852	4.70914	0.17218	27.35	7.9656	10.7487	14.7292
FBgn0030789	5.14581	0.188557	27.2905	9.76205	20.3985	15.5531
FBgn0040373	13.554	0.497613	27.2381	0.396221	0.444758	2.50017
FBgn0003416	4.84275	0.177825	27.2332	11.1438	14.3098	21.2975
FBgn0029867	2.91766	0.10724	27.2067	54.6387	77.2591	77.0081
FBgn0034755	7.11232	0.261466	27.2017	4.73748	3.14029	1.67362
FBgn0038304	2.28709	0.084091	27.1978	29.3581	42.8695	35.0534
FBgn0034498	2.61685	0.0962327	27.193	11.8991	15.9126	15.6841
FBgn0025725	2.52002	0.0926923	27.187	51.9246	56.5394	72.9088
FBgn0051950	11.8973	0.437898	27.1692	8.52528	15.7241	36.0681
FBgn0029944	6.57278	0.242546	27.0992	2.52853	6.94483	3.08315
FBgn0000576	4.3453	0.160369	27.0957	0.687641	1.49642	1.15225
FBgn0283666	2.44214	0.0901624	27.086	127.755	157.357	179.561
FBgn0039727	3.55038	0.131098	27.0819	4.50186	7.82291	6.31358
FBgn0035923	5.13348	0.190002	27.0181	9.08456	8.54826	17.7185
FBgn0038989	4.22844	0.156668	26.9897	11.0819	19.5702	18.6491
FBgn0052076	3.34219	0.123955	26.963	12.0066	17.5075	9.50627
FBgn0284249	2.68127	0.0994502	26.9609	76.2848	108.543	99.2373
FBgn0052576	5.74022	0.213121	26.9341	60.3036	30.9067	31.5399
FBgn0037798	4.34292	0.161321	26.921	32.2693	60.5492	44.2134
FBgn0031041	10.8651	0.403866	26.9027	16.5697	3.53303	29.4213
FBgn0027535	5.16903	0.192145	26.9017	14.4666	19.5701	29.5603
FBgn0011211	3.24251	0.120532	26.9015	1479.18	1894.06	2191.56
FBgn0032151	4.05516	0.150769	26.8964	202.088	371.877	273.203
FBgn0039182	2.36425	0.0880918	26.8385	11.6191	13.7378	15.9551
FBgn0038592	4.58753	0.171137	26.8062	3.45316	4.21266	6.94082
FBgn0039156	3.76897	0.141068	26.7174	21.7665	20.8857	36.1449
FBgn0033207	38.9263	1.4582	26.6947	0	0.281063	1.24836
FBgn0050296	3.24307	0.121515	26.6886	141.42	189.507	219.624
FBgn0026059	4.81407	0.180564	26.6613	89.3707	104.681	164.587
FBgn0035210	18.8089	0.70551	26.66	4.4241	1.96539	0.520309
FBgn0003041	4.47026	0.167739	26.6501	11.0603	9.41243	19.3194
FBgn0033135	8.89014	0.333812	26.6322	4.39054	16.8883	9.10008
FBgn0051528	9.75861	0.366545	26.6232	22.1062	5.65827	6.73984
FBgn0033029	3.77398	0.14193	26.5905	87.7378	107.618	156.607
FBgn0052667	9.18704	0.346204	26.5365	20.2987	67.5129	12.4396
FBgn0026361	6.41915	0.242338	26.4884	1.54892	2.04172	3.69149
FBgn0035034	57.8514	2.1843	26.4851	0	0	10.2213
FBgn0030735	2.08887	0.0788741	26.4837	61.8322	80.6161	77.6422
FBgn0267384	2.47602	0.0935435	26.4691	88.5027	123.454	103.004
FBgn0034350	3.27087	0.123714	26.4389	59.6263	102.782	72.846
FBgn0263236	7.01824	0.265467	26.4373	69.5299	106.771	174.029
FBgn0027615	2.03579	0.0770069	26.4364	32.8592	25.4824	36.4731
FBgn0011336	3.65483	0.13829	26.4287	40.2389	51.2037	66.2482
FBgn0040342	7.84525	0.297488	26.3717	4.15143	1.35858	1.6898
FBgn0036134	3.51875	0.133438	26.37	77.1595	108.194	131.775
FBgn0035470	1.95516	0.0742021	26.3491	23.9475	31.9269	26.724
FBgn0067783	3.53817	0.134332	26.339	45.6593	59.5912	73.7923
FBgn0027498	5.00361	0.190004	26.3342	38.0959	71.4994	61.0969
FBgn0027497	4.1338	0.157028	26.3252	42.3204	57.1657	67.7449
FBgn0035951	2.00124	0.0760861	26.3023	100.547	106.199	132.908
FBgn0024997	15.279	0.580906	26.302	4.15692	30.8003	15.5482
FBgn0027583	3.99709	0.151997	26.2971	28.566	47.4847	45.6351
FBgn0031361	3.774	0.143516	26.2966	13.3105	10.0637	8.42014
FBgn0038815	4.56387	0.173816	26.257	78.1448	98.6522	145.13
FBgn0033058	2.82077	0.107497	26.2405	9.62658	12.0744	15.0497
FBgn0259707	3.91615	0.149416	26.2097	213.523	217.7	345.21
FBgn0028572	4.02244	0.153503	26.2043	167.57	264.212	244.431
FBgn0054045	38.9793	1.48916	26.1753	1.50251	0.739071	0
FBgn0030318	4.53698	0.173345	26.1731	14.2863	22.5296	24.8964
FBgn0038584	7.07907	0.270477	26.1726	8.31224	12.0731	21.3303
FBgn0022699	2.58286	0.0987124	26.1655	42.1419	62.5141	50.6728
FBgn0028382	4.03176	0.15409	26.165	32.0416	47.0638	21.8001
FBgn0033240	2.94526	0.112676	26.1393	17.8061	16.2852	26.1291
FBgn0038395	26.0787	0.999582	26.0896	1.47257	0.750389	0.123213
FBgn0000559	2.61847	0.100435	26.0713	1387.62	1783.95	1876.5
FBgn0035964	3.98653	0.152947	26.0647	87.1022	98.3584	154.235
FBgn0022153	3.13841	0.120474	26.0505	29.24	44.1917	28.4413
FBgn0023516	3.40824	0.130841	26.0487	30.5791	49.623	27.9176
FBgn0000158	49.2687	1.8936	26.0186	0	0	5.87888
FBgn0261353	53.0869	2.04167	26.0017	0.230908	0.015394	168.308
FBgn0030474	4.9153	0.189102	25.9929	17.3807	33.2811	25.8437
FBgn0033566	4.84746	0.186521	25.9888	27.9085	26.2791	49.4958
FBgn0035137	2.40437	0.0925912	25.9675	16.1349	22.154	21.8634
FBgn0037850	9.26303	0.35685	25.9578	4.69804	15.7132	4.86859
FBgn0040268	6.05425	0.233343	25.9457	7.93305	16.9861	6.28364
FBgn0038165	6.92329	0.266874	25.9422	58.8713	127.145	144.61
FBgn0003460	3.94011	0.151949	25.9304	2.03826	2.41387	1.22071
FBgn0036299	5.43102	0.209566	25.9155	15.4903	22.8181	33.2476
FBgn0038609	2.76067	0.106585	25.9011	10.0933	16.2622	10.2443
FBgn0035099	6.98251	0.269705	25.8894	5.00733	1.82066	6.06419
FBgn0003302	4.5061	0.174114	25.8801	27.4036	23.4618	48.9848
FBgn0024986	3.56873	0.137898	25.8794	120.414	70.9165	88.233
FBgn0035900	3.67741	0.142253	25.8512	41.8009	68.7997	60.6491
FBgn0035229	2.9823	0.115413	25.8403	68.7691	94.1135	96.4506
FBgn0086679	2.28328	0.0883864	25.8329	61.3356	75.0966	82.5746
FBgn0035246	2.61234	0.101126	25.8326	516.31	701.263	774.201
FBgn0038981	10.3026	0.398892	25.8281	2.05004	3.88033	8.43281
FBgn0031315	4.25292	0.164787	25.8086	33.4221	37.3039	60.2867
FBgn0030699	2.99719	0.116137	25.8073	68.0074	91.4417	95.5507
FBgn0036793	29.1954	1.13175	25.7966	1.48893	0.102702	0.0509749
FBgn0031020	2.47145	0.0958081	25.7959	24.9488	29.1692	34.7698
FBgn0028717	2.69069	0.104313	25.7944	70.5498	51.4338	89.1667
FBgn0029995	7.03067	0.272589	25.7922	4.24685	2.18065	1.89676
FBgn0029687	1.83415	0.0712068	25.758	299.289	252.107	237.678
FBgn0038092	1.61839	0.0628666	25.7432	86.45	107.466	99.2649
FBgn0259146	2.75567	0.107165	25.7143	48.9212	53.6612	77.0922
FBgn0002121	5.76071	0.224113	25.7045	8.03877	7.91309	3.53031
FBgn0020764	5.17216	0.201408	25.6799	131.938	199.51	252.859
FBgn0033028	4.15404	0.161868	25.6631	97.1884	143.325	158.561
FBgn0036110	34.1572	1.33168	25.6497	0	0.787211	1.43011
FBgn0033557	4.98773	0.194643	25.625	9.2663	12.6923	16.6649
FBgn0053094	3.18556	0.124349	25.6179	110.377	128.013	170.978
FBgn0026402	3.08529	0.120454	25.6139	28.3519	42.8835	22.9416
FBgn0023129	7.31019	0.285533	25.6019	127.376	240.232	333.448
FBgn0039780	15.4275	0.602858	25.5907	1.82993	2.78441	0.26602
FBgn0039965	2.75581	0.107691	25.59	102.845	83.147	131.58
FBgn0036915	1.23337	0.048202	25.5875	56.4915	70.337	61.374
FBgn0002736	5.80311	0.226871	25.5788	32.457	70.6345	68.5822
FBgn0028341	3.66977	0.143502	25.5729	99.315	59.0336	123.93
FBgn0032987	4.77708	0.186944	25.5536	2073.35	2151.68	3815.76
FBgn0030839	8.57284	0.335632	25.5424	1.58058	4.26702	4.00643
FBgn0037422	40.3009	1.57909	25.5216	0	0.117865	1.40037
FBgn0028707	9.81708	0.385226	25.484	3.72534	6.68044	13.5961
FBgn0029885	2.53416	0.0995151	25.4651	40.5004	56.1932	56.2189
FBgn0030777	10.294	0.404411	25.4543	2.26313	10.7687	1.59941
FBgn0037610	4.173	0.16403	25.4405	32.3332	41.4554	56.3518
FBgn0037323	34.1839	1.34396	25.4353	0.0734435	0	1.0839
FBgn0261113	3.49323	0.137366	25.4301	155.648	210.586	241.597
FBgn0031174	3.21755	0.12655	25.4251	46.2864	67.3439	65.8356
FBgn0267487	2.68088	0.105452	25.4226	37.2367	52.0197	51.0812
FBgn0034854	2.0896	0.0822339	25.4105	47.1411	56.4345	60.8858
FBgn0265607	8.86431	0.348891	25.4071	12.4271	21.44	36.5716
FBgn0037856	2.56806	0.101218	25.3717	18.9597	18.3605	27.1008
FBgn0259111	3.5852	0.141337	25.3664	88.134	98.9538	145.895
FBgn0039896	4.50508	0.17763	25.3621	2.36448	3.98899	4.20736
FBgn0037621	2.85652	0.11272	25.3418	38.0428	47.6647	56.7497
FBgn0035504	4.36124	0.172126	25.3375	24.8335	24.6203	48.1249
FBgn0262139	3.17674	0.125403	25.3322	8.78244	8.32244	13.1441
FBgn0031995	2.14232	0.0845728	25.3311	79.3703	97.1679	101.677
FBgn0030775	9.7699	0.386113	25.3032	1.70002	8.4315	1.21046
FBgn0024365	2.6983	0.106694	25.2901	22.203	27.6974	32.467
FBgn0083953	6.05852	0.239613	25.2846	63.6317	109.379	144.143
FBgn0260862	5.33348	0.210944	25.2838	40.8019	52.4625	83.0472
FBgn0002931	15.4206	0.610382	25.2639	8.72924	17.5125	1.36525
FBgn0013726	1.66013	0.0657306	25.2565	145.607	181.804	159.599
FBgn0001098	3.07044	0.12159	25.2525	409.948	546.13	604.829
FBgn0036761	1.61969	0.0641412	25.2519	49.9267	59.3495	43.6693
FBgn0029134	2.8044	0.111063	25.2506	122.347	124.407	174.554
FBgn0011206	7.26563	0.287922	25.2347	266.303	103.224	149.155
FBgn0030551	22.0275	0.872926	25.2341	0.380191	11.3839	0.392803
FBgn0051612	11.1582	0.442554	25.2131	2.47394	4.9987	8.54023
FBgn0265298	2.15211	0.0854191	25.1947	113.968	98.039	144.952
FBgn0023213	6.16448	0.244752	25.1866	105.145	194.065	208.188
FBgn0034958	2.16322	0.0859466	25.1694	213.103	267.218	266.486
FBgn0035889	5.27252	0.209514	25.1654	21.6243	20.0179	40.8488
FBgn0035112	12.8388	0.510397	25.1545	39.763	30.238	6.72369
FBgn0052183	3.2847	0.130627	25.1457	91.9158	135.277	138.243
FBgn0036754	8.16737	0.325145	25.1191	5.79925	26.0214	6.50049
FBgn0030503	10.2421	0.407785	25.1164	6.68818	31.3467	16.5251
FBgn0034734	3.62913	0.144572	25.1026	3.29475	4.56882	5.2544
FBgn0038332	7.22846	0.28806	25.0936	16.4748	21.8196	7.70915
FBgn0267378	2.38386	0.0950187	25.0883	123.129	81.9047	157.758
FBgn0030239	8.32016	0.331649	25.0872	13.0225	8.20047	3.65425
FBgn0052250	4.14734	0.165565	25.0496	57.5559	73.4729	103.367
FBgn0284254	3.58976	0.143352	25.0416	16.7833	28.5581	20.9811
FBgn0038829	3.85946	0.154127	25.0409	31.7904	44.454	50.5434
FBgn0038390	10.8324	0.432788	25.0293	0.793067	1.56811	3.67803
FBgn0032393	3.23778	0.12959	24.9848	75.191	113.148	101.989
FBgn0036688	14.8755	0.596693	24.9299	2.67306	0.45606	0.857398
FBgn0050343	13.4529	0.539666	24.9282	2.52415	9.034	13.146
FBgn0027587	3.11725	0.125073	24.9235	38.4232	59.4435	50.8428
FBgn0052649	5.15417	0.207141	24.8824	12.8392	14.8462	25.1335
FBgn0030570	31.3574	1.26166	24.8541	0	0.277483	1.03089
FBgn0035158	15.6342	0.629046	24.8538	17.0447	2.17483	4.29617
FBgn0051414	7.65476	0.308013	24.8521	6.28556	19.6322	6.24355
FBgn0053530	28.5891	1.15111	24.8362	0.713565	27.5975	9.04664
FBgn0026189	4.20226	0.169356	24.8132	108.761	183.997	164.643
FBgn0031092	6.20857	0.250289	24.8056	28.61	17.6793	11.2115
FBgn0038964	2.22431	0.0896983	24.7977	21.3249	25.6594	29.7346
FBgn0261609	3.43665	0.138612	24.7933	70.5027	104.301	103.048
FBgn0261625	3.7877	0.152808	24.7873	48.5036	63.6829	81.8681
FBgn0262579	9.33082	0.376874	24.7585	72.2142	75.7847	267.965
FBgn0051088	16.6528	0.673099	24.7405	1.62102	1.9231	0.204926
FBgn0036660	4.21074	0.170225	24.7363	9.96614	16.9163	14.4001
FBgn0002526	6.85022	0.277057	24.725	1.73362	6.12548	1.79877
FBgn0028836	2.14329	0.0867373	24.7102	69.1887	60.1411	88.6954
FBgn0030996	3.8104	0.154227	24.7064	43.2433	61.0077	30.7391
FBgn0005585	3.03424	0.122816	24.7056	323.71	366.17	469.477
FBgn0015571	9.26232	0.374949	24.7029	3.29798	10.1115	8.48783
FBgn0052280	11.9223	0.483434	24.6616	30.1193	76.0662	114.709
FBgn0039673	18.8409	0.764087	24.6581	0.715576	0.512547	7.94512
FBgn0003676	2.92247	0.118597	24.6421	45.6189	53.5553	66.7503
FBgn0033773	25.6611	1.0417	24.6339	0.537873	13.3938	0.207331
FBgn0000119	3.57433	0.145101	24.6334	18.8344	23.3138	31.1498
FBgn0259991	24.3769	0.989691	24.6308	2.39172	0.514951	16.8865
FBgn0029833	5.20003	0.211255	24.615	51.921	57.5333	107.838
FBgn0004687	1.70358	0.0692344	24.606	89.3034	115.376	98.9062
FBgn0052220	7.7775	0.31613	24.6022	246.816	86.8773	90.7894
FBgn0039776	2.86949	0.116655	24.5982	60.9485	88.7872	53.1838
FBgn0030931	19.7019	0.801067	24.5945	0.27909	0.695491	4.97683
FBgn0004863	3.42608	0.139406	24.5763	4.36234	6.40884	2.91723
FBgn0032033	4.16171	0.169341	24.5759	14.8564	9.171	9.8295
FBgn0021764	4.14813	0.168867	24.5644	12.8014	20.1925	21.4625
FBgn0015271	14.402	0.586784	24.544	3.15882	0.326109	1.35245
FBgn0039877	4.38667	0.178743	24.5417	8.45557	10.2312	5.24335
FBgn0041775	4.18529	0.170676	24.5218	91.5945	138.681	136.81
FBgn0026207	2.69798	0.110111	24.5023	11.6799	11.9606	16.8028
FBgn0051201	31.8591	1.30091	24.4899	3.2071	0.111838	0.378936
FBgn0024846	4.01693	0.164191	24.465	38.9092	50.8941	63.5983
FBgn0033886	2.62119	0.107173	24.4575	67.2208	79.818	95.4769
FBgn0036643	2.72964	0.111688	24.44	48.2455	47.5913	72.3125
FBgn0011740	2.63713	0.107937	24.432	28.9201	42.2313	36.3838
FBgn0033971	2.5155	0.103001	24.4221	22.051	28.9148	30.9462
FBgn0267977	27.1872	1.11323	24.422	4.55153	0.140262	15.1586
FBgn0000536	1.88722	0.0774105	24.3793	60.0868	81.9516	67.6082
FBgn0260648	5.98265	0.245531	24.3662	7.75099	10.795	17.3699
FBgn0031219	23.4564	0.963308	24.3498	0.465691	9.90782	1.67369
FBgn0264303	12.5857	0.516968	24.3453	11.2148	0.589664	8.5492
FBgn0010240	2.90721	0.119421	24.3442	159.692	218.212	221.956
FBgn0038363	3.42497	0.140719	24.339	53.081	36.2495	64.0294
FBgn0026479	3.23934	0.133205	24.3184	92.9534	112.461	144.24
FBgn0002780	2.30001	0.0946461	24.3012	74.1497	68.1213	100.282
FBgn0029573	9.25525	0.38099	24.2926	1.92236	7.66743	6.13719
FBgn0033672	2.50118	0.103	24.2833	46.9645	62.587	65.8606
FBgn0037584	31.6247	1.30286	24.2734	0.161064	8.02494	9.40223
FBgn0004580	4.25839	0.175474	24.2679	666.43	881.698	1150.16
FBgn0040281	3.55713	0.14669	24.2493	292.626	439.557	423.755
FBgn0042135	3.03434	0.125227	24.2308	264.497	208.489	169.838
FBgn0031270	5.09236	0.210163	24.2305	9.84887	5.4088	13.1292
FBgn0001220	2.72662	0.112534	24.2293	249.769	354.281	316.018
FBgn0029768	6.81402	0.281275	24.2254	76.8464	63.625	186.587
FBgn0031877	5.28792	0.218334	24.2194	2.22239	2.22564	4.26578
FBgn0002413	7.5793	0.313077	24.209	34.0614	94.8832	78.6587
FBgn0033539	3.51761	0.145334	24.2036	20.8182	29.1304	33.4623
FBgn0038745	2.37143	0.0980218	24.1929	77.7462	73.1082	105.851
FBgn0041171	2.47623	0.102425	24.1759	36.9243	50.8383	47.3175
FBgn0032150	5.10316	0.211346	24.146	8.71732	9.62277	17.3688
FBgn0001291	2.86721	0.118795	24.1357	54.2288	47.3148	74.7686
FBgn0261610	2.50098	0.103692	24.1192	29.1544	32.9423	41.2035
FBgn0250830	4.53186	0.187946	24.1125	99.7902	98.5311	188.561
FBgn0032900	23.3282	0.967782	24.1048	4.39698	164.426	13.8006
FBgn0032775	4.53319	0.188076	24.1029	58.298	35.0055	34.1988
FBgn0052006	36.7031	1.52294	24.1002	0.115472	0.613828	19.0763
FBgn0037265	6.675	0.277122	24.0869	29.4014	46.7114	75.5005
FBgn0037882	2.5858	0.107358	24.0857	17.9137	17.0688	26.3267
FBgn0031299	5.59684	0.23239	24.0838	83.6262	153.708	180.73
FBgn0031589	2.83114	0.117554	24.0837	47.1399	52.9799	69.9727
FBgn0032870	2.1611	0.0897622	24.0759	30.6317	22.614	33.2538
FBgn0029913	3.93969	0.163703	24.0662	16.7494	15.7361	26.3564
FBgn0086712	2.42764	0.100945	24.0491	39.0458	43.3976	55.681
FBgn0036289	12.2434	0.509201	24.0443	0.581618	1.85708	3.04044
FBgn0034183	10.627	0.442174	24.0335	0.458266	0.796151	1.93913
FBgn0039137	2.44808	0.102025	23.9949	33.9011	36.6999	47.5672
FBgn0000139	4.92828	0.205547	23.9764	25.9961	47.0151	42.8759
FBgn0030323	2.24465	0.0936249	23.9749	42.1607	42.1134	30.297
FBgn0013954	2.29175	0.0956415	23.9619	417.937	539.122	546.256
FBgn0001087	4.57395	0.191186	23.9241	44.6201	80.0577	81.4448
FBgn0265595	5.26159	0.220076	23.9081	36.7562	93.9227	41.0414
FBgn0052095	2.10178	0.0879244	23.9044	17.1053	21.6449	15.9725
FBgn0038330	3.04349	0.127424	23.8847	76.7074	95.9428	111.562
FBgn0027616	2.92221	0.122427	23.869	249.447	313.235	383.163
FBgn0032130	4.58215	0.192083	23.8551	25.6409	38.341	47.4204
FBgn0037908	2.27906	0.0955456	23.8531	67.8098	88.2394	89.3355
FBgn0028552	2.83716	0.119084	23.8248	386.684	438.175	562.136
FBgn0038051	32.8244	1.37805	23.8195	0.159815	6.57423	0
FBgn0020513	5.17524	0.217521	23.7919	29.346	48.6911	60.8697
FBgn0035878	4.42496	0.186169	23.7686	15.6932	25.9297	26.8834
FBgn0031379	4.15445	0.174911	23.7519	51.4318	71.9257	92.6435
FBgn0032867	9.04412	0.380961	23.7403	1.52868	0.356669	1.63183
FBgn0031782	3.68827	0.155399	23.7342	13.9894	18.6575	9.67089
FBgn0038872	3.22038	0.135693	23.7329	50.1041	67.7535	76.9415
FBgn0033990	5.68159	0.239672	23.7057	16.0598	16.7603	7.29788
FBgn0035409	27.4218	1.1575	23.6905	0.139603	0	3.22388
FBgn0261850	3.99917	0.168898	23.6781	7.05757	12.3827	10.8752
FBgn0034261	4.80321	0.20301	23.6599	115.881	159.677	224.027
FBgn0085261	15.6409	0.661081	23.6595	7.34901	5.6781	1.07934
FBgn0034853	3.69614	0.156266	23.6529	4.97376	7.34409	8.11401
FBgn0040153	5.98079	0.252955	23.6437	24.5385	44.6288	61.7014
FBgn0086608	5.6204	0.237864	23.6286	2.27482	1.07069	3.09663
FBgn0260756	3.18359	0.134767	23.6229	27.7616	50.3686	32.8126
FBgn0086371	5.19112	0.219753	23.6226	45.1933	47.3352	94.7696
FBgn0003447	1.34356	0.0568916	23.6162	31.7444	38.053	38.9251
FBgn0031476	6.58855	0.279158	23.6015	1.75415	1.09001	4.27327
FBgn0001137	6.12127	0.260359	23.5109	1.78056	1.27413	3.44542
FBgn0265464	2.62481	0.111663	23.5065	23.2939	33.6948	29.6817
FBgn0022343	2.50121	0.10641	23.5053	47.3954	49.9063	65.5978
FBgn0032911	2.88112	0.122614	23.4975	44.0178	66.8704	57.1585
FBgn0051072	2.92185	0.124447	23.4788	101.127	119.403	147.665
FBgn0038850	27.7633	1.18281	23.4723	1.52874	0	0.108818
FBgn0285879	3.12287	0.133195	23.4459	8.79695	10.2066	13.7382
FBgn0052813	2.92821	0.124939	23.437	28.2046	28.7184	18.8306
FBgn0032193	3.50168	0.149428	23.434	23.8111	34.4271	38.5057
FBgn0263846	4.25204	0.181458	23.4326	64.1184	94.3916	120.178
FBgn0285958	12.4689	0.532999	23.3939	11.2472	4.46165	44.9148
FBgn0036805	2.04762	0.0876461	23.3624	146.006	117.55	158.13
FBgn0016119	2.69033	0.115158	23.362	691.47	995.608	947.904
FBgn0013756	3.3616	0.143895	23.3615	21.6612	25.8964	36.7347
FBgn0038578	3.86057	0.165313	23.3531	13.5144	22.2125	19.8688
FBgn0264750	11.912	0.510483	23.3348	1.77892	9.71826	2.29445
FBgn0000077	3.69955	0.158547	23.334	26.1997	35.7576	44.6365
FBgn0039273	3.75674	0.16113	23.315	9.60833	10.8889	17.3275
FBgn0034172	4.02671	0.172753	23.309	26.8011	37.8346	42.7614
FBgn0029813	14.8125	0.636211	23.2824	0.17148	0.253797	1.41227
FBgn0015589	2.75869	0.118565	23.2672	82.9341	100.146	114.688
FBgn0263231	2.38971	0.102813	23.2432	160.636	195.195	231.655
FBgn0263738	9.7885	0.421467	23.2248	16.1361	43.8815	43.5607
FBgn0002914	2.265	0.0977463	23.1723	71.5626	83.0855	57.8379
FBgn0002579	4.9267	0.212716	23.161	2380.89	3244.98	1263.03
FBgn0052554	8.3393	0.360185	23.1528	4.95589	11.1507	14.9495
FBgn0050172	2.37524	0.102644	23.1406	506.464	357.736	419.615
FBgn0003410	1.23987	0.0535923	23.1352	49.6852	59.4049	59.7321
FBgn0035907	31.5872	1.36575	23.128	7.87421	14.9653	0.155736
FBgn0029778	4.71413	0.203872	23.123	12.5714	13.9318	24.5518
FBgn0032395	1.91827	0.082992	23.1139	18.2176	19.3484	24.3159
FBgn0039714	4.48529	0.194118	23.106	42.1837	57.0327	74.3319
FBgn0000256	2.23732	0.0968662	23.097	64.4289	87.8192	52.7134
FBgn0026060	2.148	0.0930715	23.079	44.5331	43.6877	60.3572
FBgn0031281	3.19635	0.138504	23.0777	14.8739	22.9945	20.0353
FBgn0035603	4.37365	0.189811	23.0421	127.908	181.874	82.4277
FBgn0052532	5.07584	0.220293	23.0414	8.26746	17.6816	12.2231
FBgn0025790	1.7595	0.0764206	23.0239	151.281	190.732	156.682
FBgn0030707	7.58937	0.330157	22.9871	36.8511	44.4679	100.911
FBgn0033382	4.85854	0.211529	22.9686	98.9804	87.3927	50.4908
FBgn0024956	3.32389	0.144747	22.9635	34.7803	61.5991	38.3076
FBgn0039299	43.6976	1.90354	22.956	0	0	2.05352
FBgn0038853	4.17869	0.182207	22.9337	117.71	159.189	218.128
FBgn0003360	2.49398	0.108887	22.9043	3519.14	4119.68	4971.36
FBgn0030004	2.95507	0.129029	22.9024	11.7802	18.0525	12.3261
FBgn0286199	9.88151	0.431615	22.8943	0.649606	1.55205	0.248431
FBgn0033712	2.331	0.101836	22.8897	15.6536	23.0994	14.3943
FBgn0000257	1.97005	0.0860858	22.8848	38.825	48.2837	50.4292
FBgn0003612	1.8192	0.0795784	22.8605	81.1117	94.1333	106.293
FBgn0022893	4.44911	0.194649	22.8571	169.078	247.922	308.441
FBgn0029719	8.93209	0.391311	22.8261	3.13277	0.861674	2.37554
FBgn0040636	3.65324	0.160074	22.8222	41.5885	29.2404	27.3358
FBgn0034532	28.1918	1.23591	22.8107	3.0444	1.68246	0.104115
FBgn0033685	9.96544	0.437053	22.8014	1.03473	3.01735	2.91094
FBgn0039902	11.4888	0.50389	22.8002	49.6814	144.817	210.479
FBgn0039882	3.02476	0.132734	22.7882	47.4565	41.7131	32.042
FBgn0024352	2.90407	0.127492	22.7784	58.2393	74.2828	88.3849
FBgn0013548	6.10338	0.268074	22.7675	5.87233	14.1679	5.94526
FBgn0030625	3.59767	0.158164	22.7465	12.5058	9.2458	7.62063
FBgn0020372	3.12561	0.137683	22.7014	1232.71	1873.68	1739.97
FBgn0032883	4.65486	0.205164	22.6884	14.189	21.1059	25.2342
FBgn0044872	10.6246	0.46839	22.6831	8.3243	3.62389	27.4324
FBgn0033056	22.9517	1.01209	22.6775	0.0586952	0.0460452	1.23346
FBgn0031149	2.23225	0.0984821	22.6665	62.1862	67.7377	87.001
FBgn0040077	8.07532	0.356407	22.6576	117.534	48.717	59.4458
FBgn0038783	32.9131	1.45456	22.6276	0	0	1.32549
FBgn0035044	7.18764	0.317779	22.6184	5.06492	6.68538	13.3884
FBgn0011289	2.45102	0.108474	22.5954	59.5969	91.9682	57.9025
FBgn0024238	2.62617	0.116241	22.5925	140.347	172.344	191.964
FBgn0264489	8.0664	0.357045	22.5921	6.11895	1.69254	3.74386
FBgn0031969	5.13893	0.22751	22.5877	22.4757	20.9225	10.5868
FBgn0267488	2.84195	0.125857	22.5808	13.1567	17.5489	19.7058
FBgn0029843	3.61124	0.160377	22.5171	44.1676	60.6128	31.9428
FBgn0250786	2.47693	0.11005	22.5074	52.9775	60.0327	73.9838
FBgn0030060	8.1976	0.364543	22.4873	24.9225	29.0579	80.2381
FBgn0038666	2.45867	0.109339	22.4867	29.078	33.8335	39.7249
FBgn0027512	3.40531	0.151507	22.4763	44.443	31.6575	57.5742
FBgn0025743	2.40745	0.107136	22.4711	57.7896	62.7216	42.4528
FBgn0035084	8.99185	0.400169	22.4701	3.33875	1.66499	7.93918
FBgn0038533	3.32604	0.14807	22.4627	25.0536	34.1342	40.5183
FBgn0029718	2.22115	0.0988827	22.4625	91.6825	70.7112	68.938
FBgn0010772	2.83164	0.12608	22.459	208.748	202.096	306.249
FBgn0036356	5.6087	0.249743	22.4579	8.83275	21.8345	9.40129
FBgn0000028	4.06422	0.18102	22.4517	32.011	22.424	17.659
FBgn0034750	3.33934	0.148767	22.4467	58.2355	73.6807	87.3722
FBgn0039817	16.6189	0.740541	22.4416	0.677096	2.91565	5.44782
FBgn0041627	6.54185	0.291726	22.4247	8.37558	13.2546	20.8336
FBgn0051935	3.59026	0.160238	22.4058	27.5201	46.6715	28.4063
FBgn0028360	3.9197	0.175172	22.3762	26.9815	36.2281	43.0126
FBgn0033929	3.62155	0.161866	22.3737	23.1468	39.6983	30.3848
FBgn0039505	3.57972	0.160113	22.3574	70.4837	111.487	95.9191
FBgn0053558	3.33919	0.149438	22.345	62.4681	96.1804	103.401
[truncated: 6,541 more rows]

## Sheet: anova_female
Interspecific and intraspecific variability in females
gene_id	MS_sp	MS_st	MS_sp/MS_st	TPM_dmel	TPM_dsim	TPM_dyak
FBgn0250851	80.198	0.0120335	6664.58	44.7262	0.00158376	29.4883
FBgn0039341	104.669	0.0252699	4142.03	0	38.6889	30.2685
FBgn0259933	61.1555	0.0173172	3531.49	59.5053	5.54556	0.0279326
FBgn0264605	76.7995	0.0290379	2644.81	8.62282	18.8197	6.80577e-06
FBgn0000116	32.6868	0.012437	2628.18	133.25	3481.23	3425.32
FBgn0037549	33.3987	0.0132244	2525.55	38.5683	37.5711	0.693989
FBgn0261839	73.7209	0.0311696	2365.15	0.0210247	31.6766	44.8055
FBgn0260759	25.1712	0.0126141	1995.49	6.9864	98.6764	67.163
FBgn0259202	56.4903	0.028541	1979.27	92.4437	5.39371	0.0793459
FBgn0028581	52.3748	0.030369	1724.61	0	0	1.15921
FBgn0060296	28.8602	0.0185611	1554.88	16.5474	250.991	356.002
FBgn0263046	104.768	0.0712419	1470.6	0	17.6491	71.4047
FBgn0030196	22.5029	0.0190168	1183.32	12.184	175.514	61.3012
FBgn0035375	13.8248	0.012259	1127.73	13.9187	55.6512	60.4161
FBgn0035795	85.8427	0.0845103	1015.77	0	24.322	0.729664
FBgn0028525	63.5449	0.0659765	963.145	2.76003	0.345138	0
FBgn0035413	83.5555	0.0943513	885.579	0	0.989931	16.0375
FBgn0040687	95.3602	0.114222	834.865	0	24.6364	9.52273
FBgn0032721	11.1407	0.0137585	809.733	31.133	45.6972	129.618
FBgn0266672	24.3325	0.0305452	796.606	40.8383	791.031	198.93
FBgn0034856	17.0584	0.0218708	779.961	6.57112	6.03284	2.80255
FBgn0265968	46.6566	0.061644	756.872	70.27	0.26411	84.5
FBgn0053198	14.7219	0.0201387	731.024	14.5077	85.8746	41.121
FBgn0263755	28.6065	0.0403028	709.79	3.67618	58.6072	67.0394
FBgn0029971	20.0728	0.0288324	696.189	407.708	34.5084	425.801
FBgn0266195	53.9852	0.0779381	692.667	19.2536	13.47	0.0243885
FBgn0038927	41.5573	0.0603013	689.162	0.608912	46.5039	44.4904
FBgn0261843	30.3211	0.046933	646.05	1.94857	38.6051	46.7067
FBgn0052669	27.6556	0.0442295	625.274	2.12319	62.5363	2.40266
FBgn0267398	8.99588	0.0148042	607.656	195.311	152.751	513.67
FBgn0034649	46.9106	0.0808714	580.065	1.0165	113.346	99.3844
FBgn0039130	17.7705	0.0308339	576.328	10.9773	27.4583	102.159
FBgn0083973	45.7916	0.0823924	555.775	3.38807	0.0889638	44.6038
FBgn0037322	89.617	0.163271	548.886	0	8.74234	11.3527
FBgn0039966	8.59889	0.0157895	544.594	54.4962	112.988	140.934
FBgn0264477	59.7229	0.111305	536.568	1.31014	0	1.32548
FBgn0024912	22.944	0.0428349	535.639	19.4052	26.5035	1.23627
FBgn0003278	15.8954	0.030487	521.383	6.36418	45.5993	7.08007
FBgn0085319	56.9329	0.113866	499.999	0	1.91285	0.0370446
FBgn0039165	8.82163	0.018502	476.794	15.8347	39.6637	35.8706
FBgn0039854	2.9987	0.00634753	472.42	64.3647	85.5405	50.7425
FBgn0263750	34.1599	0.0738895	462.311	2.76621	2.70495	0
FBgn0021742	23.3707	0.0508256	459.821	1.32596	0.28717	11.4849
FBgn0038860	9.59851	0.0210481	456.027	9.68445	13.7171	33.0402
FBgn0066304	51.6236	0.114023	452.749	5.03074	2.43302	0.00586948
FBgn0028741	28.8074	0.0644697	446.836	3.07492	52.7815	59.0021
FBgn0259204	12.9169	0.0289262	446.546	52.9228	15.6588	106.682
FBgn0036188	13.4679	0.0306102	439.979	73.7062	18.6281	19.488
FBgn0260223	38.5652	0.0912995	422.403	142.504	1.3562	203.9
FBgn0053100	23.1371	0.0557705	414.863	286.396	364.588	18.8509
FBgn0038468	66.6927	0.164063	406.508	0	0	4.68662
FBgn0261838	31.9929	0.0787207	406.41	1.19926	31.3809	27.308
FBgn0030012	8.77747	0.0217259	404.01	7.2741	12.3841	22.4275
FBgn0003141	9.13417	0.0227437	401.613	34.4344	28.495	97.9613
FBgn0031195	19.1009	0.0480591	397.446	38.9206	23.1725	3.43327
FBgn0004957	14.2367	0.0361083	394.28	9.17604	54.245	9.1133
FBgn0033459	25.4778	0.0648275	393.009	1.02381	10.1088	16.0152
FBgn0260229	29.9928	0.0770837	389.095	12.4024	0.315873	1.37905
FBgn0040009	38.0255	0.0982261	387.122	0.198762	3.61372	21.9667
FBgn0039645	39.3506	0.101889	386.208	0.80783	0.669394	96.1272
FBgn0053111	14.6615	0.0380135	385.692	14.3651	65.2575	61.0391
FBgn0037652	14.9455	0.0387915	385.277	35.0964	8.69278	6.98433
FBgn0030631	7.97906	0.020932	381.189	15.85	28.1334	41.1743
FBgn0085279	16.2329	0.0427713	379.527	51.2256	6.99302	61.5123
FBgn0052945	74.8706	0.197581	378.935	0	21.1827	0.047919
FBgn0037228	35.4863	0.0937353	378.58	16.6274	29.6565	0.250178
FBgn0044419	32.093	0.0875529	366.555	86.3585	113.898	2.3734
FBgn0000253	12.8955	0.035376	364.526	890.685	3380.71	3328.15
FBgn0053116	6.41129	0.018152	353.201	36.3359	66.8045	72.0676
FBgn0027507	11.8323	0.0335735	352.43	36.5942	63.3458	167.466
FBgn0030556	5.07799	0.0145017	350.166	67.3295	88.7006	40.9885
FBgn0038588	5.11009	0.0146377	349.105	12.9122	15.5072	25.2163
FBgn0038262	20.7385	0.0600392	345.416	3.17201	21.6813	29.2702
FBgn0086445	7.7621	0.0228089	340.309	7.98649	10.4438	21.4426
FBgn0260392	29.9238	0.0886071	337.714	20.9653	1.28804	128.201
FBgn0038309	40.1903	0.121217	331.557	0.5174	44.7367	0.194939
FBgn0051161	40.9474	0.125184	327.097	8.21424	5.55082	0.0489579
FBgn0051251	11.629	0.0356846	325.884	11.5102	39.1243	7.63187
FBgn0037715	5.06054	0.0157952	320.385	98.1986	177.131	152.137
FBgn0030976	6.67185	0.0209521	318.433	98.608	179.998	208.268
FBgn0264962	8.37379	0.0263081	318.297	199.051	72.0737	101.779
FBgn0033032	6.06488	0.0194753	311.413	33.6244	44.515	72.2429
FBgn0031003	14.4537	0.0464894	310.904	3.23121	2.9562	19.4765
FBgn0035238	12.662	0.041185	307.443	24.7357	40.6427	119.41
FBgn0031189	8.33328	0.0271445	306.997	15.1875	42.5342	20.9996
FBgn0039238	25.8078	0.0845645	305.185	0.848131	1.10263	28.9361
FBgn0000316	9.01001	0.0298092	302.256	60.9036	38.3721	19.8684
FBgn0038746	9.03789	0.0305404	295.932	11.6179	31.6347	25.4037
FBgn0024364	11.396	0.0385346	295.735	7.59397	7.55568	28.1899
FBgn0030659	5.6755	0.0192055	295.514	15.5714	15.247	31.2633
FBgn0033117	11.7158	0.0418539	279.921	25.1165	85.8175	72.061
FBgn0051999	17.0202	0.0625406	272.147	42.4297	6.24343	67.4196
FBgn0000482	6.48852	0.023953	270.886	19.6142	25.2331	44.3894
FBgn0030719	5.8994	0.0218584	269.891	261.61	395.84	550.137
FBgn0029809	47.5306	0.177062	268.44	0.477335	33.2894	79.0968
FBgn0039089	3.14914	0.0117936	267.02	98.6723	143.147	118.021
FBgn0010926	5.73188	0.0219806	260.769	7.97266	13.8789	14.3093
FBgn0005778	32.7655	0.126459	259.1	1.80816	0.343158	0.0525824
FBgn0036929	24.8267	0.0966197	256.953	28.7196	78.6163	2.22806
FBgn0026143	4.47641	0.0174319	256.795	15.0999	22.8343	11.4797
FBgn0040371	53.6031	0.209764	255.54	1.68222	21.0389	0
FBgn0264816	8.12738	0.0323882	250.937	12.3288	15.971	34.1477
FBgn0030995	10.4094	0.0420856	247.339	3.03478	5.70848	11.2153
FBgn0035934	9.20487	0.037242	247.164	3.9518	5.98716	12.2945
FBgn0024371	6.09727	0.0247245	246.609	26.3698	30.7703	56.8669
FBgn0054025	61.9653	0.251728	246.16	6.69989	134.227	0.0246114
FBgn0039561	6.82537	0.0278368	245.192	69.25	118.355	150.573
FBgn0038576	9.15172	0.0376505	243.071	25.7558	14.6569	8.33784
FBgn0002909	20.0803	0.0830131	241.893	2.62506	16.938	24.5952
FBgn0033609	6.88255	0.0285535	241.04	62.8628	89.7126	148.703
FBgn0000392	67.4912	0.281377	239.861	0	0.537993	1.83539
FBgn0031858	7.73811	0.0325587	237.666	50.0244	107.15	110.424
FBgn0030752	3.94142	0.0166043	237.373	96.7021	112.146	160.669
FBgn0033468	3.35305	0.0141638	236.734	20.8245	20.3625	31.8153
FBgn0032818	7.65737	0.0324343	236.089	27.7093	11.0189	26.636
FBgn0032724	6.6488	0.0282623	235.254	24.367	12.11	31.8298
FBgn0036035	19.5301	0.0836254	233.543	18.2448	187.497	18.4819
FBgn0053512	4.28589	0.0183849	233.12	127.281	192.827	199.779
FBgn0029703	69.4747	0.299594	231.896	0	0.126724	9.26561
FBgn0040514	31.5641	0.136205	231.74	0.790244	40.543	4.54076
FBgn0030208	9.69288	0.0423019	229.136	93.6918	31.4666	110.791
FBgn0034735	4.1119	0.0180204	228.18	20.6422	14.255	12.3225
FBgn0265184	18.0559	0.080236	225.035	3.68515	22.6009	22.3901
FBgn0033569	7.6411	0.0339933	224.782	7.03119	13.1301	16.9042
FBgn0051634	24.6132	0.109709	224.35	0.8933	17.5826	0.946313
FBgn0027866	8.778	0.039495	222.256	64.9577	115.616	188.225
FBgn0267977	60.9604	0.275767	221.057	2.3028	0	10.248
FBgn0030945	7.90335	0.0358549	220.426	26.0674	43.1675	65.9369
FBgn0032988	8.48453	0.0393345	215.702	60.239	65.7611	177.591
FBgn0035436	27.1263	0.125899	215.46	5.63021	78.6277	95.9611
FBgn0033845	10.3069	0.0484364	212.793	3.61456	1.01874	3.66299
FBgn0037120	8.19234	0.0385455	212.537	94.3808	71.0745	32.9514
FBgn0015520	10.2333	0.0484733	211.112	32.9808	14.5841	69.1041
FBgn0032859	5.97984	0.0286218	208.926	38.9171	49.6439	83.3781
FBgn0264426	60.0347	0.287604	208.74	2.40964	0	0.417173
FBgn0033524	25.3426	0.122641	206.64	1.08202	1.72744	30.1807
FBgn0039930	17.8631	0.0872422	204.753	44.0853	7.97529	6.93771
FBgn0263656	61.1104	0.300792	203.165	2.63747	0	0
FBgn0039929	9.92176	0.0488676	203.034	212.203	92.5006	65.3267
FBgn0262364	41.0953	0.202449	202.991	1.05224	213.566	8.9899
FBgn0015338	5.93468	0.0296105	200.425	76.7747	102.363	161.839
FBgn0029745	31.4392	0.157828	199.199	1.89061	0.0345006	0.881314
FBgn0035272	11.962	0.0601812	198.767	38.84	154.044	31.0736
FBgn0034372	41.0589	0.206627	198.711	1.58745	85.9589	90.9376
FBgn0030859	40.7155	0.205645	197.989	0.227307	0.223765	35.632
FBgn0261064	5.4208	0.0273991	197.846	19.3609	25.2215	38.6154
FBgn0260430	80.0303	0.407825	196.237	0	1.34195	25.4594
FBgn0037030	30.1535	0.155734	193.622	2.95683	149.732	8.56779
FBgn0039280	15.153	0.0785794	192.837	4.10368	21.5992	16.5168
FBgn0032922	11.6189	0.0607874	191.14	21.8332	38.4847	87.0402
FBgn0058191	6.58959	0.0344813	191.106	59.5857	74.1525	135.435
FBgn0266668	5.68584	0.0299692	189.723	30.4853	50.749	57.5737
FBgn0030970	10.6008	0.056095	188.98	14.1843	16.1416	54.2281
FBgn0053995	39.0563	0.207794	187.957	15.9589	0.201713	46.3052
FBgn0058439	13.151	0.070384	186.847	78.5288	339.027	261.899
FBgn0020381	8.92735	0.0479745	186.085	8.24905	23.2863	7.07003
FBgn0052833	55.0565	0.296139	185.914	0	0	1.26333
FBgn0030695	10.3743	0.0563613	184.069	21.5036	11.4501	6.04072
FBgn0266124	5.27706	0.0289352	182.375	101.919	135.921	208.291
FBgn0031184	19.5383	0.107437	181.859	5.39798	51.3312	26.515
FBgn0040877	5.19641	0.028642	181.427	72.5703	128.119	130.949
FBgn0029525	7.58193	0.0421643	179.819	7.9738	20.4045	14.1353
FBgn0050148	36.5066	0.203129	179.722	0.893439	1.11954	0
FBgn0050273	33.7927	0.188189	179.568	0.0226026	3.67005	1.03374
FBgn0000617	8.58831	0.0479157	179.238	14.3063	22.3621	40.6741
FBgn0034070	17.5867	0.0982461	179.007	87.9333	9.60309	93.6582
FBgn0053494	46.5967	0.261627	178.104	4.08554	4.91735	0.0320003
FBgn0037241	5.82424	0.0328207	177.456	23.9101	21.7016	45.5263
FBgn0265101	6.3156	0.0357776	176.524	55.8442	95.9221	124.06
FBgn0032914	29.7556	0.168704	176.378	1.90498	9.38652	0.199214
FBgn0052190	5.10392	0.0289382	176.373	125.23	164.25	239.542
FBgn0037232	4.47046	0.0254437	175.701	21.4713	20.2513	36.3042
FBgn0267790	5.68546	0.0325099	174.884	107.481	76.3386	191.031
FBgn0023509	6.65331	0.0380674	174.777	15.7314	31.1492	33.2735
FBgn0039994	8.79985	0.0507938	173.247	98.9999	294.019	163.821
FBgn0023535	20.9447	0.122602	170.835	3.4406	29.2373	27.5915
FBgn0027617	12.788	0.0750844	170.315	6.36553	8.70823	33.5614
FBgn0020388	7.25864	0.0427364	169.847	40.1054	76.5033	85.6829
FBgn0031144	14.8431	0.0877703	169.113	3.30275	4.31463	21.0081
FBgn0030440	31.7749	0.188187	168.848	0.55261	0	1.14957
FBgn0015270	32.9349	0.195267	168.666	0.392337	24.2212	2.39099
FBgn0030228	8.71746	0.0516879	168.656	18.6492	35.1757	50.0765
FBgn0038110	6.52981	0.0392092	166.538	19.6123	39.4916	35.8202
FBgn0000273	9.54073	0.0574397	166.1	143.177	377.426	419.134
FBgn0032250	4.97588	0.0301221	165.19	19.9053	33.2227	31.7583
FBgn0033610	25.1376	0.153097	164.194	1.02394	2.05535	26.3457
FBgn0034442	15.1874	0.0929498	163.393	7.04492	48.0432	10.2457
FBgn0011642	8.72165	0.0535046	163.008	209.501	553.98	165.85
FBgn0030286	4.59172	0.0282433	162.577	74.725	122.567	112.483
FBgn0031142	34.8101	0.216607	160.707	1.54751	13.77	114.36
FBgn0037703	12.5551	0.0785856	159.763	21.3729	105.342	29.1117
FBgn0037293	5.31605	0.033359	159.359	25.1411	18.7951	42.5535
FBgn0037005	8.53187	0.0536849	158.925	0.509847	0.48711	1.74853
FBgn0038448	16.1631	0.101993	158.472	0.540932	0.638835	4.06734
FBgn0053178	34.0488	0.216501	157.269	1.2579	61.7659	19.1433
FBgn0052808	10.8967	0.0702272	155.164	13.7647	44.9201	38.4532
FBgn0038956	64.8851	0.418593	155.008	5.92634	4.44878	0
FBgn0031194	7.00067	0.0452266	154.791	38.3594	69.3643	83.5442
FBgn0031245	7.64941	0.0497152	153.865	174.894	367.275	401.12
FBgn0267378	4.64147	0.0302545	153.414	130.142	81.9257	164.842
FBgn0052163	11.8344	0.0773051	153.086	17.9376	80.2691	24.1794
FBgn0033483	6.69296	0.0437887	152.847	44.7756	56.1335	104.174
FBgn0029747	41.0896	0.272274	150.913	2.82646	0.0254459	1.42013
FBgn0030320	11.6979	0.0779525	150.065	20.7158	31.9021	90.1502
FBgn0037225	70.164	0.467657	150.033	19.9371	0.370317	0
FBgn0266284	3.70786	0.024726	149.958	18.6742	27.7451	26.4262
FBgn0036685	5.90316	0.0393971	149.837	58.1377	66.3541	119.517
FBgn0035120	6.431	0.043145	149.055	15.9724	11.3857	7.08225
FBgn0038320	4.20723	0.0282597	148.877	34.4326	48.2559	56.5413
FBgn0037229	65.607	0.444128	147.721	79.5905	16.3057	0.0398563
FBgn0260860	8.12206	0.0551753	147.205	32.9689	60.2791	83.2913
FBgn0038369	8.30664	0.0566104	146.733	72.7654	27.0212	70.2102
FBgn0038640	6.39572	0.0437277	146.262	13.3255	13.1034	29.2123
FBgn0037031	10.4928	0.0719065	145.922	46.4259	101.255	19.7614
FBgn0260775	18.3496	0.126014	145.615	13.8921	66.5148	106.35
FBgn0010258	34.2053	0.237428	144.066	1.06435	1.65924	82.7884
FBgn0051201	43.7322	0.305294	143.246	3.05345	0.0261077	0.334751
FBgn0030787	11.4922	0.0807485	142.321	42.5507	24.9658	10.1114
FBgn0026393	11.2423	0.0794585	141.487	13.7142	52.669	24.6666
FBgn0030877	9.87011	0.0698748	141.254	7.08111	24.8328	12.643
FBgn0031304	4.65662	0.0329908	141.149	45.1458	54.8558	81.4394
FBgn0014380	10.9155	0.077407	141.014	12.5714	29.6162	53.7484
FBgn0035316	35.5862	0.254587	139.78	0.456476	1.2779	0.0107357
FBgn0024362	2.76814	0.0200356	138.161	39.7356	56.9232	41.3761
FBgn0284254	3.67027	0.026651	137.716	16.8609	27.5417	21.9351
FBgn0259175	5.0383	0.0365881	137.703	46.0853	48.8355	86.4439
FBgn0052537	8.74986	0.0635919	137.594	9.84504	14.6291	28.8332
FBgn0011771	4.52786	0.0329831	137.278	33.4038	45.667	58.0681
FBgn0026679	5.95022	0.0435758	136.549	11.1363	10.2328	22.2793
FBgn0286507	35.1296	0.257511	136.42	0.471389	42.2093	0.579267
FBgn0037431	69.6847	0.511387	136.266	3.3551	0	0
FBgn0033307	63.0372	0.464941	135.581	1.11	0	0
FBgn0032483	45.3464	0.334616	135.518	0.095925	9.81023	0.0115812
FBgn0025592	4.36336	0.0324518	134.457	57.0476	77.8452	97.4675
FBgn0004896	3.6398	0.0272473	133.584	30.9308	40.8718	47.2628
FBgn0025642	49.5251	0.371086	133.46	0.574833	0	2.46787
FBgn0030346	6.44099	0.0485625	132.633	55.3591	101.5	107.701
FBgn0033885	24.9253	0.188457	132.26	9.85135	90.9611	145.888
FBgn0040056	8.06171	0.0613155	131.479	390.067	133.103	220.465
FBgn0030892	9.25766	0.0706505	131.035	58.6988	33.2382	18.23
FBgn0037978	5.11591	0.0390436	131.031	60.344	33.2722	66.8666
FBgn0028491	11.8809	0.0907386	130.936	4.46022	1.79733	1.04574
FBgn0264897	60.3744	0.461292	130.881	7.60916	0	0.723184
FBgn0004648	7.77687	0.0595039	130.695	526.443	713.244	239.334
FBgn0260238	50.6798	0.387998	130.619	0.41789	0	1.27324
FBgn0261068	8.5472	0.0659442	129.613	16.3092	20.1208	49.8886
FBgn0023516	3.34681	0.0259228	129.106	29.3866	43.8188	26.4071
FBgn0037689	51.1414	0.397196	128.756	0.57103	70.21	114.562
FBgn0015905	8.79056	0.069185	127.059	6.28109	7.10994	17.8044
FBgn0003416	5.13653	0.0405579	126.647	9.8616	11.9313	19.3343
FBgn0262820	21.7587	0.172516	126.126	10.4756	8.20734	0.758391
FBgn0026064	59.1529	0.473232	124.998	0	0.758316	1.13402
FBgn0040780	11.3428	0.0907914	124.933	38.2785	13.2076	66.1282
FBgn0030738	4.33724	0.03477	124.741	28.59	27.2432	48.0597
FBgn0003353	5.66768	0.0454835	124.61	82.6685	117.659	163.881
FBgn0041630	4.18597	0.0336189	124.512	43.8763	51.1229	78.5012
FBgn0033348	11.1172	0.090283	123.137	4.31612	2.00724	12.116
FBgn0033401	3.38045	0.027623	122.378	26.9539	32.1446	41.4963
FBgn0032925	6.5383	0.0534645	122.292	12.6317	20.7765	26.7257
FBgn0032639	34.3599	0.281183	122.198	0.759893	4.81802	0.0444308
FBgn0038769	7.64449	0.0628016	121.724	4.32938	4.93664	11.8164
FBgn0030067	7.30536	0.0600455	121.664	6.02499	8.93574	15.3516
FBgn0033844	6.28315	0.0522472	120.258	148.571	321.321	236.915
FBgn0039691	5.49836	0.0461226	119.212	17.5358	25.2377	34.3249
FBgn0036920	4.92492	0.041717	118.055	50.2232	85.2272	77.9115
FBgn0086348	17.4776	0.149003	117.297	0.715168	6.79852	3.93276
FBgn0037249	5.63734	0.0481557	117.065	124.098	244.191	186.388
FBgn0066114	5.89207	0.0504382	116.818	43.5863	80.7452	75.0426
FBgn0039565	17.8547	0.153282	116.483	22.1572	0.863098	28.0425
FBgn0039229	5.11735	0.0440679	116.124	237.983	447.247	343.904
FBgn0030468	4.99028	0.0430129	116.018	32.8751	45.6639	61.3495
FBgn0265784	7.81412	0.0677168	115.394	46.0434	22.0809	71.8171
FBgn0033891	6.76345	0.0586613	115.297	20.3417	22.6305	48.7953
FBgn0030864	6.92108	0.0600562	115.243	12.5998	17.6568	29.9519
FBgn0038469	53.9144	0.46804	115.192	0	0	1.0086
FBgn0032800	4.43919	0.0388878	114.154	77.9281	112.986	131.078
FBgn0052850	9.63714	0.0844457	114.122	79.4249	79.4103	260.073
FBgn0037755	7.99856	0.0701372	114.042	25.7214	71.0465	31.2385
FBgn0029689	7.09059	0.0623374	113.745	23.1268	35.3841	57.2513
FBgn0010348	2.94072	0.025964	113.261	395.595	512.553	568.605
FBgn0030000	4.30894	0.0382453	112.666	9.4804	15.7952	15.5464
FBgn0260233	27.2323	0.242101	112.483	35.5548	1.223	0.607217
FBgn0004858	5.91732	0.052673	112.341	31.9221	37.8237	64.9927
FBgn0038144	24.3893	0.218428	111.659	0.668322	0.0911747	3.50434
FBgn0030742	4.48529	0.040223	111.511	165.601	192.429	288.463
FBgn0029002	10.0894	0.0906055	111.355	20.9577	12.4019	5.73532
FBgn0032415	27.1627	0.244081	111.285	1.19457	1.49221	0.0656412
FBgn0034731	5.54874	0.0498796	111.243	103.928	178.882	189.728
FBgn0040268	7.99968	0.0720645	111.007	7.36541	19.1409	5.90932
FBgn0030793	6.41045	0.0579873	110.549	13.0454	14.9585	29.7328
FBgn0003295	9.57701	0.0870735	109.988	11.161	20.6278	38.8308
FBgn0029580	8.10834	0.0739767	109.607	15.1919	41.4922	14.0647
FBgn0030963	8.56209	0.0781582	109.548	8.77504	8.28542	2.78556
FBgn0085346	22.1155	0.20196	109.505	38.8604	7.1927	2.54106
FBgn0050183	8.63966	0.0792785	108.979	4.46101	12.4156	5.70266
FBgn0039907	9.86461	0.0905901	108.893	77.0674	146.597	248.531
FBgn0032986	8.43422	0.0777392	108.494	114.173	102.116	39.8701
FBgn0031045	27.3794	0.253355	108.067	1.58734	40.7545	1.02444
FBgn0033357	11.1621	0.103796	107.539	384.572	188.778	92.7832
FBgn0003607	4.513	0.041971	107.527	153.783	81.6809	115.529
FBgn0284256	3.83689	0.0357325	107.378	52.4584	81.3051	75.9148
FBgn0261004	25.8897	0.241167	107.352	2.02068	0.149419	0.146667
FBgn0037231	6.09276	0.0568709	107.133	157.963	190.408	338.961
FBgn0031227	8.89528	0.0832907	106.798	5.69827	11.6997	15.6926
FBgn0036759	12.0372	0.113011	106.513	8.1702	30.6189	22.1757
FBgn0037670	4.85621	0.0456145	106.462	21.0688	16.9987	34.8233
FBgn0029913	7.18537	0.0675198	106.419	13.0311	9.06981	27.1594
FBgn0260760	6.64107	0.0626078	106.074	73.1683	32.7199	46.8924
FBgn0033504	6.02106	0.0567818	106.039	36.2175	17.5939	41.4296
FBgn0032388	5.01334	0.0474714	105.608	55.736	77.4327	104.276
FBgn0031232	25.3725	0.240747	105.391	0.909187	2.45199	0.0793867
FBgn0032533	79.3489	0.752933	105.386	0	11.2791	1.39988
FBgn0037759	23.4762	0.22334	105.114	2.30099	0.540905	0.113938
FBgn0033905	14.9248	0.142209	104.949	21.8651	4.42938	38.8229
FBgn0039848	20.4129	0.194586	104.904	2.36715	26.628	7.73063
FBgn0032919	4.73802	0.0452116	104.796	57.0337	81.2118	37.7316
FBgn0025111	15.4629	0.147771	104.641	8.12654	12.5098	1.447
FBgn0037385	81.5444	0.7859	103.759	8.76881e-06	3.36432	42.13
FBgn0030582	5.869	0.0566194	103.657	43.7872	64.1471	85.7486
FBgn0052772	5.96827	0.0577884	103.278	55.9023	64.011	121.509
FBgn0033087	6.78338	0.0657739	103.132	26.4105	38.9421	61.8878
FBgn0040929	11.3236	0.109932	103.006	4.45797	11.4947	16.7423
FBgn0015803	9.46529	0.0920577	102.819	28.9806	10.5368	44.0933
FBgn0050356	41.2269	0.401508	102.68	2.57006	0.0302649	12.7877
FBgn0259209	17.0727	0.166307	102.658	11.9513	1.66661	2.08793
FBgn0001206	7.67071	0.0747832	102.573	5.66526	10.0925	14.6657
FBgn0034962	2.15275	0.0210134	102.447	31.5802	30.4815	41.8765
FBgn0033592	56.5662	0.554096	102.087	0	0	2.09024
FBgn0038437	3.67981	0.0361651	101.75	26.363	24.594	40.9361
FBgn0028542	21.4416	0.210789	101.721	11.5194	18.1347	1.00833
FBgn0001123	3.34784	0.0331146	101.099	267.104	359.281	390.511
FBgn0030739	7.90923	0.0783313	100.972	8.54828	21.1531	17.5734
FBgn0030078	9.808	0.0973822	100.717	1.63857	1.68727	6.31092
FBgn0005777	3.07978	0.0306891	100.354	34.6285	37.5932	50.745
FBgn0086908	4.30022	0.0429361	100.154	20.0413	12.1407	13.6688
FBgn0034486	27.5571	0.276061	99.8229	3.82919	130.184	6.42563
FBgn0036836	24.5598	0.246314	99.7094	7.80263	0.810405	34.6288
FBgn0030813	8.76263	0.0880695	99.4968	3.63527	3.96941	10.6036
FBgn0028375	5.4216	0.0546342	99.2345	18.5276	26.7596	36.9967
FBgn0040089	30.4758	0.30713	99.2274	0.265323	0.667217	14.0756
FBgn0014189	2.91896	0.029693	98.3045	92.0697	88.5284	131.132
FBgn0083991	9.60797	0.0978654	98.1753	62.2953	17.1443	55.599
FBgn0085243	33.0577	0.336827	98.1444	0.603257	1.36963	0
FBgn0038063	17.1723	0.175097	98.0734	78.695	8.23827	35.1761
FBgn0259726	57.4371	0.586346	97.9576	73.6239	0.0916934	0.103442
FBgn0030391	5.51973	0.0565012	97.6923	34.9599	61.2546	62.5342
FBgn0033133	13.9321	0.143153	97.3229	51.7304	29.5056	8.6543
FBgn0038427	1.88539	0.0194709	96.8312	59.4349	71.5902	73.4335
FBgn0032515	6.25734	0.0646703	96.7576	174.534	238.567	397.813
FBgn0037581	34.7083	0.359052	96.6665	3.37842	0.0652515	2.59715
FBgn0003449	7.69221	0.0796386	96.589	100.822	88.0737	38.2453
FBgn0016975	12.6206	0.130922	96.3981	144.167	572.999	406.172
FBgn0037536	6.6647	0.0691708	96.3514	106.481	155.961	239.66
FBgn0039342	49.6935	0.516122	96.2824	1.92131	0	0.228475
FBgn0266421	7.56614	0.0786542	96.1949	19.3317	52.856	22.3192
FBgn0259725	39.5012	0.410777	96.1622	9.01139	0.0916253	0.170209
FBgn0030876	7.56184	0.0786493	96.1463	27.0413	28.352	10.9011
FBgn0030306	6.9491	0.0723071	96.1054	45.2672	101.015	84.8919
FBgn0028740	19.2615	0.200875	95.8878	0.699723	0.969533	8.87049
FBgn0024182	7.99106	0.0833654	95.8558	6.84375	18.2096	8.13382
FBgn0000520	2.67864	0.028039	95.5325	19.9707	13.9279	14.8231
FBgn0039710	4.89562	0.0513622	95.3156	28.7985	37.613	53.2069
FBgn0037240	8.31539	0.0872806	95.2719	21.9593	28.2359	60.646
FBgn0024987	9.58618	0.100705	95.1906	106.843	217.083	306.395
FBgn0000032	4.95935	0.052103	95.1835	18.3959	25.3636	34.222
FBgn0027786	6.70457	0.0709177	94.5403	128.548	67.9446	192.204
FBgn0035044	8.17702	0.0866761	94.3399	5.42173	7.30512	15.2829
FBgn0033247	3.86285	0.0410592	94.0801	34.1484	42.8527	22.7987
FBgn0033358	7.05752	0.0755069	93.4685	457.139	529.917	205.529
FBgn0052736	23.3402	0.250043	93.3445	22.0645	69.3759	1.99545
FBgn0039065	4.89211	0.0524674	93.241	29.8152	26.7428	15.3801
FBgn0027539	3.45382	0.0372057	92.8304	22.9724	33.2703	19.3038
FBgn0038211	20.8934	0.225212	92.7721	33.0366	4.36307	3.35656
FBgn0250911	15.5273	0.167389	92.7617	57.9853	42.4824	8.26584
FBgn0030027	18.6332	0.201593	92.4298	0.203767	1.83959	0.640482
FBgn0031054	6.10441	0.0663524	91.9998	31.4426	26.932	14.1145
FBgn0026576	6.32931	0.0688379	91.9452	37.7377	59.2051	76.9115
FBgn0035245	9.84369	0.107241	91.79	55.2544	54.775	190.642
FBgn0039160	4.40127	0.0481915	91.3288	34.3246	43.7751	61.6688
FBgn0032979	4.31794	0.0473253	91.2396	74.8765	88.6366	126.894
FBgn0031058	64.8217	0.711907	91.0535	0.400675	74.8007	0
FBgn0035816	8.47513	0.0935277	90.6162	160.978	61.5182	79.0313
FBgn0030900	31.8166	0.351445	90.5308	0.450568	29.5404	0.9411
FBgn0032047	14.6101	0.16183	90.2808	5.08936	9.63805	1.07319
FBgn0031608	6.26213	0.0694942	90.1101	9.32302	15.7561	18.7604
FBgn0037656	6.30098	0.0699294	90.1049	11.7671	15.0755	6.14413
FBgn0035073	15.5377	0.172518	90.0642	16.8022	2.347	14.9819
FBgn0033060	5.68064	0.0632483	89.8149	25.6103	18.9702	45.8551
FBgn0030789	7.54891	0.0840798	89.7827	7.0324	17.6738	12.116
FBgn0264002	6.889	0.0767973	89.7036	11.2203	12.2291	27.1233
FBgn0261989	61.2713	0.683131	89.6919	2.96589	1.68019	0
FBgn0035286	14.1938	0.158366	89.6269	2.22787	0.442637	3.69455
FBgn0032974	8.23401	0.092068	89.434	22.6095	53.3704	58.0652
FBgn0039609	4.92386	0.0551443	89.2905	45.0797	78.6114	82.4234
FBgn0030326	32.1702	0.361847	88.9056	0.413013	6.2354	18.2436
FBgn0035953	4.09161	0.0465348	87.9259	26.1148	34.9043	43.7188
FBgn0031059	6.18139	0.0703237	87.8992	44.096	37.7266	20.3682
FBgn0034978	4.6344	0.0527319	87.8861	280.743	421.466	449.645
FBgn0030421	11.1964	0.127491	87.821	18.5456	44.5544	68.6948
FBgn0014073	17.4253	0.198941	87.59	0.388446	0.713287	3.67289
FBgn0039861	5.97538	0.0683164	87.4663	14.4333	22.2776	29.4937
FBgn0032020	9.88267	0.113179	87.3186	23.1102	77.8398	45.2531
FBgn0010342	3.80674	0.0437619	86.9876	35.9594	38.9936	58.8134
FBgn0263511	2.88263	0.0331587	86.9344	21.921	25.9095	31.0148
FBgn0036402	5.01586	0.0578148	86.7574	36.6562	23.4107	20.8422
FBgn0051220	52.5658	0.606348	86.6924	0.380035	0	8.08534
FBgn0029800	7.33439	0.0851051	86.1804	36.8204	88.2536	69.2955
FBgn0004913	4.75099	0.0551857	86.0909	22.1646	27.1792	40.8261
FBgn0004583	13.9829	0.162496	86.0509	0.687188	3.22221	3.01734
FBgn0261053	11.3115	0.131693	85.8926	0.326066	1.43076	0.706764
FBgn0032050	7.20273	0.0840816	85.6636	8.48346	16.4571	19.6356
FBgn0035267	4.61946	0.0539891	85.5628	71.6112	87.859	128.123
FBgn0037653	4.32235	0.0506645	85.3133	61.4899	80.5329	102.64
FBgn0033542	16.4265	0.19294	85.138	11.6998	4.49904	1.32778
FBgn0024491	11.6711	0.137166	85.0869	12.1626	37.7431	42.6764
FBgn0051109	5.5839	0.0656471	85.0594	39.6755	54.3101	79.8594
FBgn0024314	5.9328	0.0702203	84.4884	13.7639	16.9508	30.4331
FBgn0033375	6.96015	0.082401	84.4668	14.6819	25.7227	34.1628
FBgn0033685	11.3622	0.134627	84.3972	0.804128	2.61406	2.5531
FBgn0263132	12.3173	0.146387	84.142	4.70331	13.8282	1.52755
FBgn0001612	4.93382	0.0586534	84.1182	19.1317	34.7242	28.8907
FBgn0051368	4.53923	0.0539711	84.1048	17.0089	29.6178	19.0723
FBgn0031606	7.59299	0.0905171	83.8846	7.47548	17.2195	17.0506
FBgn0051935	4.10303	0.0490777	83.6027	28.0804	47.319	27.2677
FBgn0036959	16.0993	0.192807	83.4996	7.0052	58.4813	12.4955
FBgn0267976	4.42281	0.0531071	83.2809	184.744	297.02	295.521
FBgn0051174	62.0886	0.746319	83.1931	6.41758	1.03118	0
FBgn0027873	6.15061	0.0739569	83.1647	8.63372	10.7937	19.233
FBgn0052687	9.40881	0.113235	83.0912	5.66788	7.81555	19.2317
FBgn0030114	4.90869	0.0591649	82.9662	27.8628	36.4933	51.2888
FBgn0039830	6.14334	0.0740734	82.9359	1570.82	2484.39	3248.7
FBgn0044823	7.17702	0.0866381	82.8391	16.0348	22.0925	42.1668
FBgn0265178	13.7466	0.166224	82.6992	73.153	187.418	420.328
FBgn0022985	5.75526	0.06978	82.4772	55.5433	99.7201	106.279
FBgn0051646	8.31381	0.100913	82.3857	70.0456	31.4669	118.621
FBgn0002626	10.2002	0.123824	82.3765	529.703	1415.61	1598.89
FBgn0001105	4.13186	0.0501739	82.3508	420.093	620.551	680.584
FBgn0011737	2.66147	0.0323223	82.3414	94.676	127.16	82.8868
FBgn0022288	5.21957	0.0634834	82.2195	14.2744	14.121	27.6667
FBgn0260741	3.80745	0.0464107	82.0382	15.808	11.8597	9.33471
FBgn0035909	1.85085	0.0225756	81.9846	46.3022	47.6893	59.1531
FBgn0038768	4.082	0.0499027	81.7992	19.4185	23.8382	32.4882
FBgn0035414	11.3909	0.13941	81.7084	5.44653	7.79113	24.6836
FBgn0029755	5.24324	0.0642572	81.5978	15.2838	19.3639	29.3053
FBgn0033031	5.22808	0.0641128	81.5451	289.807	352.366	163.578
FBgn0038056	5.18436	0.0637774	81.2884	38.0545	50.2124	75.1321
FBgn0027066	3.72446	0.0458406	81.2481	209.21	332.694	286.673
FBgn0051961	5.11279	0.0630299	81.1169	51.3647	77.3315	112.584
FBgn0039419	7.13136	0.0880959	80.95	14.0529	30.7953	28.3476
FBgn0032034	25.3933	0.313716	80.9436	18.1029	24.5638	1.05452
FBgn0286051	3.00987	0.0372078	80.8934	20.4983	23.7791	30.5815
FBgn0032005	3.87672	0.0479601	80.8323	83.8088	132.764	103.558
FBgn0039622	64.099	0.793252	80.8054	2.66193	16.4557	0
FBgn0005561	9.00352	0.111549	80.7134	5.15528	11.8504	16.5323
FBgn0262877	40.2129	0.498429	80.6794	3.32278	290.901	1.06014
FBgn0259173	4.91544	0.061113	80.4319	59.3478	61.5591	109.819
FBgn0004863	4.68622	0.0583871	80.2613	4.59182	5.57016	2.80691
FBgn0051547	14.0324	0.174945	80.2102	35.3794	21.4951	6.12017
FBgn0003380	14.0572	0.17538	80.1529	378.432	63.0105	459.098
FBgn0038545	3.62242	0.045212	80.1207	12.433	14.5012	20.6627
FBgn0050496	4.49574	0.0562768	79.8862	4.94272	8.75151	6.977
FBgn0040351	4.89279	0.0614705	79.5957	100.856	177.906	160.823
FBgn0035526	4.63801	0.0584428	79.3598	193.506	221.978	360.977
FBgn0039612	15.4182	0.19454	79.2545	1.37511	1.73796	10.8159
FBgn0020238	5.69346	0.0718673	79.2219	510.395	870.2	909.843
FBgn0035109	9.85345	0.124465	79.1666	13.9522	43.068	32.8213
FBgn0030996	4.45744	0.0563645	79.0824	41.3276	55.5602	27.5161
FBgn0026417	10.9707	0.138953	78.9529	3.76905	4.25898	15.4387
FBgn0260468	16.486	0.20888	78.9259	11.3267	64.8925	71.4836
FBgn0261789	7.76865	0.0984786	78.8867	76.2547	27.1109	43.9836
FBgn0036663	4.64516	0.0589026	78.8617	367.555	564.808	670.879
FBgn0002931	15.7096	0.200057	78.5259	7.35439	11.5806	1.23588
FBgn0038564	5.26983	0.0672437	78.3691	24.3238	32.0783	48.9813
FBgn0000157	4.78475	0.0612467	78.1226	17.6243	27.5779	31.1431
FBgn0037538	3.78903	0.0485114	78.1059	24.7742	33.5741	40.265
FBgn0037150	17.3618	0.222734	77.9486	15.9235	51.5084	3.66136
FBgn0086384	4.35854	0.0560545	77.7554	10.7163	18.2185	15.1502
FBgn0033221	43.8223	0.564268	77.6622	4.93512	7.05699	0.060486
FBgn0260458	19.3482	0.249813	77.4506	2.82787	4.93802	36.0089
FBgn0023536	4.05766	0.0523942	77.4448	16.799	19.7116	28.9414
FBgn0263251	6.4144	0.0830357	77.2487	58.1994	28.158	33.6387
FBgn0083953	5.71007	0.0741203	77.0378	64.9893	80.5584	143.373
FBgn0003464	2.9887	0.0388072	77.0139	82.5058	75.5372	114.938
FBgn0029730	18.7275	0.243196	77.0056	2.6705	0.234678	1.47286
FBgn0050481	9.41712	0.122495	76.8774	31.2619	20.9968	86.656
FBgn0024913	8.3243	0.108632	76.6285	79.3883	126.343	231.286
FBgn0085339	6.92154	0.0904411	76.531	34.7512	49.7654	87.6793
FBgn0051064	4.91772	0.0643119	76.4667	90.9688	104.388	173.802
FBgn0039945	15.2066	0.199194	76.3405	9.34302	49.9312	32.5589
FBgn0039965	2.5467	0.0333849	76.2829	107.558	85.7472	127.369
FBgn0038818	6.0558	0.0798628	75.8275	130.201	128.381	267.155
FBgn0031456	3.24582	0.0428643	75.7232	12.2486	18.1171	16.2326
FBgn0001965	2.81433	0.0371841	75.6863	55.5754	72.111	75.6641
FBgn0030328	4.79865	0.0635429	75.5183	84.1618	142.835	136.637
FBgn0002783	3.5485	0.0470634	75.3983	59.6722	76.6114	92.3298
FBgn0033713	3.47617	0.0461074	75.3929	25.4573	35.6404	39.1672
FBgn0030189	10.3564	0.137791	75.1603	12.9536	12.0727	46.4741
FBgn0031050	5.06878	0.067598	74.9841	47.0476	89.5854	48.488
FBgn0028507	5.10669	0.0682082	74.8691	75.0482	119.013	129.51
FBgn0030874	6.49212	0.0867353	74.8498	7.61614	9.22814	17.2643
FBgn0033581	2.80552	0.0375543	74.7057	44.2908	56.2361	61.3069
FBgn0037297	7.66706	0.102689	74.6627	44.2192	36.4046	105.41
FBgn0034908	5.22366	0.0701648	74.4485	11.3828	23.2278	16.1279
FBgn0050503	13.3986	0.180942	74.0492	38.405	29.9954	6.88685
FBgn0029105	3.76598	0.0508627	74.0421	82.3394	125.643	116.953
FBgn0036090	6.89905	0.0932543	73.981	37.9676	51.2327	86.3909
FBgn0003319	26.4953	0.358882	73.8273	0.0714435	1.77089	1.0913
FBgn0041627	6.91038	0.0937005	73.7497	8.93181	13.5235	20.4818
FBgn0033692	7.25107	0.0984953	73.6184	12.7219	31.3776	21.8863
FBgn0263051	7.57409	0.102884	73.6178	79.6138	29.0307	66.5682
FBgn0035254	6.12979	0.0834055	73.4938	18.8106	15.2996	36.4807
FBgn0261545	4.72645	0.065024	72.6879	21.9025	40.5916	32.3438
FBgn0033742	37.1651	0.511552	72.6517	0.483115	38.5419	0.249713
FBgn0037410	18.9503	0.260954	72.6191	1.03134	0.488613	0.221494
FBgn0019972	5.96431	0.0822084	72.5511	11.943	21.9332	22.3494
FBgn0028471	2.64047	0.0363975	72.5455	51.7832	59.815	72.4948
FBgn0027794	7.74239	0.106775	72.5111	23.5503	33.5894	10.6722
FBgn0034328	54.2352	0.750368	72.2781	3.88829	80.5053	0
FBgn0266432	37.177	0.514573	72.2482	0.372285	39.7336	1.04607
FBgn0283510	6.34479	0.0878295	72.2399	69.2042	149.21	60.2959
FBgn0028515	5.29483	0.0733097	72.2255	42.4198	41.9106	82.6524
FBgn0044324	5.33009	0.0738647	72.1602	44.196	65.0638	85.2632
FBgn0027564	6.18406	0.085888	72.0014	39.5689	68.0552	79.3357
FBgn0051922	5.07596	0.0705746	71.9234	18.7937	25.5094	11.2165
FBgn0264744	13.4407	0.186958	71.8914	5.37922	27.7656	17.2451
FBgn0266410	12.6279	0.175707	71.8689	86.2795	317.709	354.523
FBgn0015789	3.15076	0.0439296	71.723	70.9619	106.533	89.0504
FBgn0014340	4.80961	0.0672132	71.5575	7.27894	8.10802	13.5332
FBgn0013720	6.0721	0.084881	71.5367	18.2968	31.0692	35.0695
FBgn0010774	4.82044	0.0673871	71.5336	149.746	182.904	270.978
FBgn0286567	3.44983	0.04823	71.5287	24.1826	30.4014	37.425
FBgn0031908	7.07049	0.0989068	71.4864	3.69798	10.5874	4.0253
FBgn0029763	3.65845	0.0511945	71.4617	19.4413	24.7458	31.1758
FBgn0034997	9.01685	0.126245	71.4232	23.7183	56.898	65.5558
FBgn0031882	4.11511	0.0576473	71.3844	39.4646	47.3494	68.1436
FBgn0030943	11.7348	0.165325	70.9799	10.7234	33.7717	35.4937
FBgn0003977	2.87005	0.0404758	70.9077	12.6677	15.525	18.7437
FBgn0036660	5.33269	0.0752115	70.9026	9.8066	17.4237	15.2562
FBgn0030406	9.06	0.128019	70.7705	50.3397	14.9064	43.4625
FBgn0262788	18.1559	0.256816	70.6963	1.27299	0.728973	0.170842
FBgn0037654	6.41133	0.0907265	70.6666	6.80799	8.91708	15.9048
FBgn0030121	4.26645	0.0604023	70.634	22.6727	35.5916	19.149
FBgn0013272	4.78672	0.0677716	70.6302	31.782	47.2687	55.083
FBgn0035524	5.78292	0.0820288	70.4986	20.3919	29.1307	40.9452
FBgn0026323	4.02447	0.0571389	70.433	39.9873	64.5423	55.4624
FBgn0030932	16.5611	0.235987	70.1779	2.12953	1.88701	16.7821
FBgn0033081	4.54745	0.0648315	70.1427	32.9431	23.4585	18.2577
FBgn0033226	4.80377	0.0685974	70.0285	51.0596	91.9975	72.4235
FBgn0031702	7.85364	0.112215	69.9876	28.0334	57.7299	67.4188
FBgn0034577	3.36325	0.0481634	69.8299	35.2293	49.9409	48.7253
FBgn0037202	4.53341	0.0650235	69.7196	15.9698	16.1221	28.2253
FBgn0003209	3.07122	0.0440585	69.7078	34.8999	46.8614	49.6746
FBgn0027335	5.17147	0.0742494	69.6501	35.1348	47.2508	65.3582
FBgn0031256	6.84973	0.0986025	69.4681	31.5285	43.6256	78.5738
FBgn0037613	6.96168	0.100249	69.4439	22.8662	52.6496	39.3314
FBgn0030293	5.27406	0.0761077	69.2973	37.2797	64.0547	65.407
FBgn0024986	6.1328	0.0886187	69.2044	123.43	61.1437	68.72
FBgn0030838	3.53171	0.0510707	69.1534	72.2092	74.9896	47.3764
FBgn0043796	3.08132	0.0445933	69.0983	21.3326	28.4289	30.0159
FBgn0086608	6.94257	0.100792	68.88	2.52054	1.08345	3.20972
FBgn0033539	4.12862	0.0600207	68.7866	22.5003	29.1659	36.1041
FBgn0050423	4.34612	0.0632094	68.7574	130.773	220.195	113.651
FBgn0000346	2.78925	0.0406455	68.6239	632.496	860.574	828.556
FBgn0030555	1.96638	0.0286812	68.5598	32.5939	32.3542	25.1292
FBgn0037709	3.88946	0.0568824	68.3772	6.28547	3.76404	5.44476
FBgn0038292	60.0829	0.879608	68.3064	2.94381	6.27599	0
FBgn0036760	3.72236	0.0545005	68.2995	55.5628	60.716	92.8084
FBgn0032730	5.72705	0.0844018	67.8546	2.22688	3.92948	4.29529
FBgn0032100	6.76025	0.0996626	67.8314	58.0871	80.6109	148.614
FBgn0000826	32.7279	0.482506	67.829	0.163533	0.395105	10.9804
FBgn0034186	6.32526	0.093507	67.6448	8.24558	10.8638	4.18808
FBgn0264305	9.68876	0.143505	67.515	25.2772	81.8833	31.5339
FBgn0037324	16.3312	0.242216	67.4243	5.13356	1.06461	0.844431
FBgn0087041	9.4602	0.140354	67.4024	13.6788	35.8419	37.7263
FBgn0263747	58.0779	0.861793	67.3919	0	0.0561532	5.18436
FBgn0051798	8.04104	0.119374	67.3601	2.68849	1.91756	0.744613
FBgn0035772	4.03931	0.0600853	67.2263	85.3289	82.7691	51.3901
FBgn0032252	29.275	0.436088	67.1309	8.48389	12.9681	0.222442
FBgn0031219	31.4454	0.468541	67.1135	0.285037	13.5807	1.80046
FBgn0030648	5.33599	0.0796064	67.0297	176.017	305.923	295.457
FBgn0259483	3.76393	0.0562553	66.908	109.789	151.359	164.636
FBgn0034371	3.25676	0.0486838	66.8963	85.2472	131.838	91.3825
FBgn0035578	14.595	0.218739	66.7231	39.9552	7.97419	9.96234
FBgn0011741	7.28034	0.109396	66.5504	29.879	31.4048	11.5551
FBgn0029837	3.67532	0.0552394	66.5345	364.006	331.105	554.611
FBgn0022160	4.11681	0.0620931	66.3006	138.95	173.244	234.782
FBgn0031228	8.4356	0.127327	66.2517	192.183	472.835	425.481
FBgn0035372	3.96178	0.0599096	66.1292	35.2217	56.3079	51.7788
FBgn0037877	4.14601	0.0627311	66.0918	37.2134	40.452	21.5756
FBgn0011746	5.77083	0.0874426	65.9956	57.389	21.5812	55.6559
FBgn0265767	7.81096	0.118433	65.9526	258.463	101.304	153.645
FBgn0034175	52.5163	0.79739	65.8602	2.60056	0.00715863	0
FBgn0038325	3.34401	0.0509198	65.672	31.9385	44.7746	43.5173
FBgn0030505	6.51266	0.0991885	65.6594	68.218	37.8736	28.3322
FBgn0010812	5.00639	0.0763081	65.6076	18.7932	11.1088	11.9389
FBgn0050290	37.1956	0.567248	65.5721	0.760381	34.6748	32.3148
FBgn0034262	15.9075	0.242872	65.4973	16.1957	1.37617	9.42566
FBgn0033960	7.94299	0.121507	65.3707	42.9011	15.0557	29.1984
FBgn0029094	4.33922	0.0664336	65.3167	29.6487	29.4472	51.4166
FBgn0050467	3.11079	0.0477208	65.1873	17.7053	21.367	26.4814
FBgn0053170	4.45653	0.0684885	65.0697	163.965	93.5235	116.461
FBgn0035825	5.38128	0.082979	64.8511	25.6935	51.4541	24.2582
FBgn0039943	3.78459	0.0584126	64.7906	56.2929	71.8364	39.8587
FBgn0259985	3.79474	0.0586029	64.7535	26.744	45.3819	34.0051
FBgn0028963	49.0767	0.75832	64.7177	1.1211	0	0.0292883
FBgn0037899	8.23257	0.127239	64.7018	542.67	1284.24	384.375
FBgn0032940	4.82955	0.0746566	64.6903	45.9114	79.9807	69.1532
FBgn0033050	6.69877	0.103715	64.5881	38.4983	41.8041	91.8344
FBgn0045852	4.96894	0.0770854	64.4602	7.88897	10.3425	14.804
FBgn0051664	27.2796	0.423468	64.4195	1.11003	0.0655013	0.275624
FBgn0263116	4.41537	0.0685909	64.3725	31.906	56.4239	54.738
FBgn0030792	7.84827	0.122122	64.2659	67.532	60.1298	22.6828
FBgn0002552	5.65282	0.0879672	64.2605	8.22601	9.41067	17.0102
FBgn0011297	15.2282	0.236984	64.2585	12.5803	97.6116	18.5501
FBgn0038541	10.034	0.156269	64.2099	1.27831	1.93503	5.03341
FBgn0020930	4.91788	0.0767118	64.1085	66.3045	105.93	113.421
FBgn0021768	5.27602	0.0823557	64.0638	23.3311	27.1097	47.6744
FBgn0037722	11.5795	0.181074	63.9487	10.1842	8.70691	41.4901
FBgn0035111	5.32379	0.0833096	63.9037	28.0387	50.7289	45.8267
FBgn0261840	25.8988	0.405535	63.8632	3.02316	42.0881	47.5939
FBgn0013342	5.49013	0.0860841	63.7763	1022.96	1783.39	1788.46
FBgn0040283	3.29705	0.0517656	63.692	41.5492	51.4147	60.8399
FBgn0031099	9.70248	0.152403	63.6631	108.893	137.335	33.2338
FBgn0039828	4.33635	0.0681874	63.5945	16.2706	23.7157	28.6975
FBgn0039156	3.80807	0.0599127	63.5603	23.1824	21.0364	35.3765
FBgn0051860	13.562	0.213372	63.5602	2.29652	4.82341	12.4934
FBgn0063485	7.58732	0.119397	63.5472	8.55826	19.1001	18.8985
FBgn0086906	30.682	0.482938	63.5321	0.141421	0.15551	7.58957
FBgn0031257	2.42429	0.0381714	63.5106	72.8737	62.9079	91.5314
FBgn0030289	4.14252	0.0652295	63.5068	44.8053	57.4016	76.5099
FBgn0034033	10.6757	0.1682	63.4706	19.4587	18.1198	5.12719
FBgn0032204	5.46976	0.0864129	63.298	21.8936	31.5738	44.0052
FBgn0038828	3.07091	0.0485724	63.2235	90.3076	120.206	129.129
FBgn0250819	19.3363	0.307318	62.9194	10.7691	89.5383	43.974
FBgn0027583	4.11903	0.0657297	62.6661	27.1574	41.7138	42.9081
FBgn0262518	3.88303	0.0619815	62.6483	58.6027	92.2839	84.6406
FBgn0011573	3.89714	0.0622104	62.6445	66.7777	67.9834	117.137
FBgn0035867	3.77305	0.0602381	62.6357	17.3835	15.937	10.2787
FBgn0032775	4.43283	0.0709059	62.5171	51.7889	33.2888	31.7934
FBgn0001986	4.31486	0.0690243	62.5123	13.6299	13.1135	7.27217
FBgn0037647	3.95703	0.0634473	62.3673	40.6977	55.284	64.4478
FBgn0004893	9.59501	0.153969	62.3177	1.03921	1.02467	0.29899
FBgn0036405	5.49418	0.0882426	62.2622	14.8681	11.3336	25.7979
FBgn0038494	3.76179	0.060574	62.1024	68.5564	111.854	93.4185
FBgn0036485	2.63461	0.0424425	62.0749	57.2982	60.9513	80.5576
FBgn0052708	6.30097	0.101538	62.0552	19.9447	43.3831	18.191
FBgn0032700	4.07674	0.0657534	62.0004	25.4461	30.0115	43.1083
FBgn0029502	6.24903	0.100875	61.9484	124.243	107.872	53.6591
FBgn0002924	3.7312	0.0603516	61.8243	3.38203	2.09954	2.98844
FBgn0003495	8.33581	0.134876	61.8034	14.1981	4.97995	17.03
FBgn0031283	63.9714	1.03622	61.7353	0	7.84619	1.46344
FBgn0029941	4.02008	0.0652361	61.6237	150.96	198.665	252.736
FBgn0034878	4.24965	0.0690081	61.5819	27.8259	42.1004	42.2497
FBgn0001978	3.57433	0.0581867	61.4287	26.3573	41.4174	36.7764
FBgn0266450	4.00943	0.0653084	61.3922	58.0532	86.809	87.9444
FBgn0024889	2.64139	0.0430316	61.3826	90.8338	67.7633	65.903
FBgn0085479	19.7826	0.322431	61.3546	0.839831	0.0834537	1.43496
FBgn0038156	4.76394	0.0776889	61.3207	97.0071	64.2801	142.369
FBgn0027589	3.94232	0.0643538	61.2601	55.5378	87.3748	81.6986
FBgn0035087	1.94993	0.03186	61.2032	113.516	129.97	143.984
FBgn0037612	17.8297	0.291323	61.2026	9.11912	37.2034	73.7344
FBgn0030776	16.7715	0.274114	61.1843	1.23137	11.0314	1.39643
FBgn0004179	7.11019	0.116253	61.1613	195.696	339.197	466.024
FBgn0030039	8.6328	0.141357	61.071	32.7499	53.1803	13.8469
FBgn0030160	17.8242	0.292486	60.9405	65.6053	390.84	428.967
FBgn0000139	4.91763	0.0806997	60.9374	27.2861	47.1783	45.0412
FBgn0010607	5.9302	0.0974748	60.8383	30.0176	24.2979	55.825
FBgn0033712	3.04453	0.050044	60.837	15.8921	22.3572	13.4906
FBgn0032151	5.80229	0.0955932	60.6977	230.112	524.316	288.557
FBgn0038387	2.97629	0.0490509	60.6776	36.6803	45.7994	55.3703
FBgn0051719	8.70722	0.143507	60.6745	6.79331	14.9323	20.7244
FBgn0034894	5.21657	0.0861603	60.5449	56.9446	86.9478	102.98
FBgn0025608	4.12327	0.0681964	60.4617	90.389	149.452	121.823
FBgn0033773	27.9599	0.462713	60.426	0.667211	13.8837	0.220533
FBgn0029706	2.36887	0.0392831	60.3026	25.7733	30.379	35.6315
FBgn0034327	33.4404	0.554938	60.2597	1.52155	0.0185444	1.32694
FBgn0011708	5.47255	0.0908489	60.2379	63.5781	111.199	109.468
FBgn0033000	4.82166	0.0803472	60.0103	138.155	151.498	258.26
FBgn0034859	6.68811	0.111921	59.7573	7.34694	17.9017	10.0597
FBgn0284249	3.14054	0.0526048	59.7006	81.6	117.531	105.898
FBgn0037142	4.20355	0.0704166	59.6954	57.373	81.7208	87.1737
FBgn0030096	5.64665	0.0947091	59.621	14.7476	29.1221	23.7563
FBgn0259722	6.02614	0.101333	59.469	69.9118	41.808	33.3694
FBgn0027515	4.49089	0.0755581	59.4362	45.0213	48.5819	77.4521
FBgn0031638	5.1241	0.0862248	59.4272	21.0058	37.2502	34.5956
FBgn0038183	6.12447	0.103193	59.3496	20.6715	46.8204	22.3331
FBgn0033757	3.8797	0.0654082	59.3153	10.6875	12.1965	18.1569
FBgn0036144	4.65784	0.0785487	59.2988	191.191	213.279	355.277
FBgn0027587	3.61423	0.0609511	59.2972	40.8041	63.362	53.4509
FBgn0003638	3.19908	0.0539756	59.2689	284.158	483.602	370.936
FBgn0031895	3.09359	0.0522045	59.259	23.6263	16.5159	29.8132
FBgn0039006	10.0247	0.169362	59.1911	4.00907	9.83575	12.0342
FBgn0085263	27.2219	0.460016	59.176	13.1247	0.725852	40.4139
FBgn0037467	3.8036	0.0643843	59.0765	43.8128	35.0678	64.9702
FBgn0261787	4.77049	0.0807519	59.0759	26.5879	31.861	48.4943
FBgn0029936	5.22593	0.0885463	59.0191	29.7433	20.9268	48.2872
FBgn0054015	10.2872	0.174517	58.9469	17.6631	14.0719	57.0001
FBgn0033737	3.21475	0.054673	58.7995	15.7037	23.9157	17.0137
FBgn0033450	5.00748	0.0851886	58.7811	4.0449	4.35417	2.02795
FBgn0038532	9.54854	0.162443	58.7808	16.6556	21.7761	57.2007
FBgn0264357	7.31422	0.124482	58.7571	80.4926	63.4955	196.88
FBgn0002905	18.7842	0.320388	58.6296	2.38735	0.228804	3.53235
FBgn0003741	7.08889	0.121004	58.5838	54.1026	123.23	97.502
FBgn0039958	8.83592	0.150923	58.5459	90.2441	268.862	92.5522
FBgn0054027	45.9465	0.784806	58.545	0.408166	2.69638	0
FBgn0029878	5.52615	0.0944008	58.5392	41.5839	69.834	80.1187
FBgn0034282	2.53256	0.0432779	58.5185	176.667	253.766	214.671
FBgn0008635	3.76296	0.064304	58.5182	57.6504	72.0263	93.1318
FBgn0033915	2.27255	0.0388634	58.4753	100.415	131.038	132.075
FBgn0035944	4.57084	0.0782803	58.3907	74.6671	97.8028	131.816
FBgn0029873	5.45945	0.0935528	58.3569	18.5546	16.3908	36.656
FBgn0039291	4.23804	0.0726515	58.3339	17.0437	30.5706	22.6373
FBgn0039904	13.7971	0.23658	58.319	48.8755	228.253	210.559
FBgn0038428	5.53366	0.0949052	58.3072	62.5222	31.454	40.0008
FBgn0031904	3.25169	0.0558097	58.2639	85.2208	131.539	91.3687
FBgn0033038	4.09706	0.0703352	58.2504	35.4528	38.6405	61.7553
FBgn0024846	3.62249	0.0622426	58.1996	40.1442	49.8841	62.1038
FBgn0027582	3.94321	0.0678064	58.1539	20.7245	33.1945	27.2292
FBgn0031896	4.8719	0.0837825	58.1494	104.529	170.823	157.91
FBgn0037254	40.1389	0.69063	58.1192	0.139424	1.18264	27.4422
FBgn0038330	3.0981	0.0533305	58.0924	76.3969	86.8351	114.83
FBgn0000449	58.6696	1.01217	57.9643	0	0.118033	25.8595
FBgn0033379	3.81447	0.0658094	57.9623	17.4239	22.5028	28.9091
FBgn0030669	6.93219	0.119772	57.878	96.8617	88.9178	39.5901
FBgn0040005	3.7084	0.0641594	57.7998	142.686	97.9046	177.529
FBgn0016126	4.76196	0.0824157	57.7797	396.636	309.973	725.106
FBgn0013762	4.04503	0.0700548	57.741	38.1158	53.6236	62.2855
FBgn0002069	3.71718	0.0644117	57.7097	28.0889	42.3069	44.7234
FBgn0052707	2.88401	0.0500114	57.6671	10.1684	10.8329	14.9326
FBgn0030869	3.67421	0.0639044	57.4954	61.4903	78.6857	97.2228
FBgn0014092	7.77424	0.135418	57.4092	20.6766	19.9632	53.9656
FBgn0039925	20.7085	0.360875	57.3841	18.7919	267.401	86.3665
FBgn0035622	2.98468	0.052074	57.3161	43.184	56.7051	62.2846
FBgn0053094	2.77134	0.0484056	57.2525	113.319	126.436	161.773
FBgn0030082	4.49521	0.0785845	57.2022	52.2777	55.867	28.645
FBgn0046247	4.37975	0.0765843	57.1887	110.629	139.193	194.636
FBgn0003189	11.2865	0.197667	57.0986	3.62407	0.995858	1.24175
FBgn0052062	5.98689	0.104926	57.0584	284.898	126.146	186.759
FBgn0039881	19.1064	0.335455	56.9566	2.73594	0.38806	0.212242
FBgn0033607	2.25367	0.0397037	56.7622	25.1379	24.2765	33.3184
FBgn0039215	2.95408	0.0520956	56.705	30.0609	37.9502	42.1904
FBgn0046222	3.65269	0.0645128	56.6197	17.0601	24.1818	27.2151
FBgn0000239	5.24363	0.0927497	56.5352	50.9058	73.0359	95.2719
FBgn0260003	19.7804	0.349939	56.5253	30.9126	37.5228	2.46116
FBgn0037329	4.00637	0.070968	56.4532	72.5989	110.609	111.905
FBgn0038504	7.00956	0.12422	56.4284	60.6898	131.663	120.677
FBgn0010399	3.80527	0.0674885	56.384	93.2397	100.494	151.767
FBgn0001247	3.27675	0.0581668	56.3338	93.6169	100.845	143.268
FBgn0283680	9.43013	0.167534	56.2879	17.122	50.5759	13.482
FBgn0052576	7.98898	0.141932	56.2873	66.0676	28.5824	27.9817
FBgn0039250	17.1651	0.305137	56.2536	0.730877	6.65731	0.725798
FBgn0032329	10.4551	0.186175	56.1572	1.68964	7.03497	3.27785
FBgn0003742	3.50759	0.0625625	56.0654	40.8743	64.5717	46.5035
FBgn0015331	6.72964	0.120214	55.9806	26.3871	22.7841	58.1774
FBgn0033428	4.69799	0.0839763	55.9443	79.0224	50.1682	108.269
FBgn0034242	4.5627	0.0816955	55.8501	66.7901	37.4901	45.9497
FBgn0033527	4.9641	0.0889258	55.823	13.4958	15.6655	25.4324
FBgn0266465	2.29771	0.0411815	55.7946	67.0735	78.6404	87.5358
FBgn0050100	42.3642	0.76028	55.7219	26.3095	0.396542	0.183153
FBgn0034726	7.53312	0.135603	55.5526	30.1555	14.1815	12.8121
FBgn0261437	7.96612	0.143651	55.4546	36.3033	36.7985	98.3777
FBgn0039149	6.97234	0.125781	55.4323	150.347	83.6281	256.774
FBgn0052732	6.21858	0.11221	55.4191	16.8085	24.4163	35.8829
FBgn0010235	3.16097	0.0570642	55.3931	181.93	243.283	259.068
FBgn0028554	3.6533	0.0659618	55.3851	100.139	150.962	144.454
FBgn0053143	2.30686	0.0417059	55.3126	43.5145	41.3611	61.6595
FBgn0029944	6.94961	0.125698	55.2882	1.16721	3.06314	1.21246
FBgn0032451	2.52574	0.04572	55.2437	23.1286	29.203	35.2298
FBgn0086856	6.53698	0.118355	55.2319	17.0568	26.9924	38.574
FBgn0037408	4.50274	0.0815431	55.2191	15.5985	11.8967	23.8453
FBgn0036793	43.8124	0.793892	55.1868	2.24692	0.157086	0.00885871
FBgn0027607	4.05264	0.0734401	55.1828	34.2999	39.3006	57.1241
FBgn0027568	3.40729	0.0618768	55.0658	34.8028	38.7733	54.6064
FBgn0035878	4.12794	0.0752404	54.8633	17.1615	27.0261	26.4521
FBgn0033129	23.1765	0.422551	54.849	0.571695	0.134701	4.10093
FBgn0085377	4.78581	0.0873289	54.8022	16.9125	19.7664	30.275
FBgn0037936	49.3549	0.900626	54.8007	11.7963	11.1645	0.0629188
FBgn0030634	5.74534	0.105138	54.6456	58.3402	85.2604	117.198
FBgn0022338	5.10257	0.0934608	54.5959	19.0171	28.9203	35.8315
FBgn0032816	4.078	0.07473	54.5698	48.2105	54.5242	82.0971
FBgn0034218	9.38835	0.172061	54.564	76.6988	20.9593	72.9714
FBgn0027581	7.61843	0.139942	54.4397	96.3467	224.655	207.901
FBgn0250907	22.796	0.419763	54.3069	1.7298	0.104577	0.148017
FBgn0033266	3.35028	0.0617768	54.232	49.4429	65.9674	71.8494
FBgn0035041	5.94918	0.109747	54.208	71.4178	103.934	150.388
FBgn0000146	16.2808	0.30053	54.1738	1.52504	2.82087	0.202582
FBgn0039465	9.46538	0.175079	54.0636	200.395	550.926	648.816
FBgn0031004	27.816	0.514634	54.0501	0.218606	0.144029	6.34917
FBgn0261055	47.733	0.88388	54.004	0	1.10211	0
FBgn0053172	8.3011	0.153813	53.9688	1.81426	3.40131	4.73909
FBgn0034054	5.16513	0.0959214	53.8476	17.6801	33.0188	25.8401
FBgn0002917	3.73925	0.0694617	53.8318	125.495	142.748	222.229
FBgn0263973	19.5941	0.364304	53.7849	0.737402	0.768385	9.14612
FBgn0061360	7.41002	0.137797	53.7747	3.2712	15.0421	13.4763
FBgn0033918	2.83654	0.0529291	53.5913	39.5087	54.7587	35.4944
FBgn0041004	10.9235	0.203869	53.581	44.4029	152.208	115.31
FBgn0035348	5.92597	0.110708	53.5278	74.071	45.8008	36.9156
FBgn0010309	3.88393	0.0726056	53.4936	32.7003	39.2159	53.0773
FBgn0023534	9.32198	0.174441	53.4391	157.961	66.9548	286.926
FBgn0037621	2.52497	0.047295	53.3876	40.6154	46.858	57.0397
FBgn0031516	5.03558	0.0944394	53.3208	5.15051	4.34442	9.22382
FBgn0035437	3.49474	0.0655884	53.2829	44.4566	62.2516	66.8522
FBgn0040252	28.4476	0.534091	53.2636	0.401558	14.8237	3.97236
FBgn0027093	4.16506	0.0782301	53.2412	14.9646	24.8838	20.5242
FBgn0010238	3.49262	0.0657351	53.1317	32.6273	47.3364	49.12
FBgn0024365	6.49164	0.12223	53.1099	19.0784	23.0875	42.4933
FBgn0052755	53.8078	1.01564	52.9795	4.47104	0	0.0739485
FBgn0003130	8.83942	0.167309	52.833	4.53628	1.61853	5.15833
FBgn0032406	33.9204	0.642123	52.8254	1.43297	0.34728	0.0255654
FBgn0260431	10.829	0.205061	52.8089	4.49033	1.7797	8.93548
FBgn0032924	4.74267	0.0898638	52.7762	38.9602	37.8673	70.5865
FBgn0002023	3.23644	0.06139	52.7194	29.3223	30.8306	45.5484
FBgn0034644	4.51672	0.0856896	52.7102	380.063	602.77	631.11
FBgn0005427	5.21045	0.0988814	52.6939	99.0428	187.283	100.212
FBgn0026777	5.20693	0.098886	52.6559	152.197	227.842	286.567
FBgn0025616	66.3068	1.26119	52.5747	0	9.24327	1.74673
FBgn0037174	12.4919	0.237744	52.5436	1.08491	1.54479	0.238659
FBgn0005322	3.91621	0.0746371	52.4699	60.0187	68.8886	103.244
FBgn0262716	3.64214	0.0694923	52.4108	46.4562	62.8259	73.0809
FBgn0259704	8.14527	0.155504	52.3798	16.8091	25.3137	47.2051
FBgn0086444	9.32877	0.178223	52.3434	10.4932	11.8268	35.8506
FBgn0024945	5.56208	0.106291	52.3288	21.4446	39.3519	36.665
FBgn0029092	4.48058	0.0856381	52.3199	116.208	141.954	201.023
FBgn0003139	3.10321	0.0593524	52.2844	44.489	66.1438	48.0746
FBgn0036091	17.6998	0.339097	52.1968	7.54392	17.0286	63.9455
FBgn0033716	5.53611	0.106126	52.1656	71.1454	62.7614	35.1921
FBgn0033134	15.8562	0.303986	52.1608	5.61761	11.4401	44.6669
FBgn0037465	7.1556	0.137199	52.1549	47.8728	21.616	24.3523
FBgn0028990	8.30387	0.159376	52.1025	21.8705	28.7935	8.75882
FBgn0001341	5.8246	0.1119	52.0519	6.31782	12.9943	10.3086
FBgn0032849	7.11959	0.136908	52.0029	22.3329	30.0116	56.4629
FBgn0262114	4.22236	0.0812083	51.9942	84.1586	110.127	146.804
FBgn0035150	4.42261	0.0851159	51.9598	8.99022	13.5202	6.73516
FBgn0029121	5.96688	0.11486	51.949	9.74763	16.3541	20.2549
FBgn0050345	23.8025	0.458334	51.9327	2.63823	1.24493	0.144283
FBgn0264361	36.2751	0.699073	51.8903	1.02469	0.216213	0
FBgn0013548	6.33737	0.122276	51.8285	6.72722	14.4006	6.63746
FBgn0040918	5.89125	0.113683	51.8218	61.4707	86.9668	128.614
FBgn0035842	8.68284	0.167923	51.7072	3.90108	10.441	8.30119
FBgn0023181	21.5138	0.416156	51.6964	9.78641	0.95572	1.34746
FBgn0027779	2.38603	0.0463603	51.4671	288.182	307.703	393.6
FBgn0029079	2.4443	0.0474976	51.4616	19.7598	23.1464	28.8526
FBgn0043458	4.96576	0.0965977	51.4066	89.016	161.291	129.351
FBgn0262511	4.1655	0.0810894	51.3692	340.307	476.2	576.07
FBgn0035558	3.99581	0.0777952	51.3631	67.075	97.0761	104.717
FBgn0001565	6.65319	0.129617	51.3298	92.289	104.674	219.605
FBgn0042693	3.56603	0.0695084	51.3036	203.524	187.292	305.027
FBgn0266720	2.46341	0.0481394	51.1725	86.4946	105.8	117.44
FBgn0031393	17.4634	0.342602	50.9728	14.4171	0.952011	5.24446
FBgn0031969	4.35008	0.0853589	50.9622	27.7041	22.5115	14.4964
FBgn0034634	10.2219	0.20078	50.9107	10.1378	37.669	19.9076
FBgn0264750	10.1357	0.199102	50.9069	2.50449	11.4196	3.20513
FBgn0036199	5.85941	0.115107	50.9042	28.1838	36.1728	59.6146
FBgn0266580	11.9101	0.234168	50.8614	5.88179	11.4524	30.4123
FBgn0035401	6.43783	0.12658	50.8599	21.822	30.6234	53.4141
FBgn0030274	6.51755	0.128488	50.7251	35.1468	31.4271	74.2315
FBgn0038857	3.07896	0.0607238	50.7044	30.843	21.9665	21.7537
FBgn0052006	39.0016	0.770043	50.6486	0.136808	0.721403	23.2887
FBgn0038854	6.79689	0.134202	50.6468	12.0405	12.9846	28.2709
FBgn0051992	4.0362	0.0798126	50.5709	331.108	326.572	576.035
FBgn0032703	5.49305	0.10866	50.5528	22.5591	24.7906	45.3905
FBgn0037137	4.87574	0.096604	50.4713	24.1373	34.3138	44.8561
FBgn0037347	18.7428	0.371368	50.4697	69.9253	18.3544	7.503
FBgn0011640	5.46046	0.108273	50.4325	109.242	221.058	163.586
FBgn0261983	6.86788	0.136434	50.3384	25.1824	42.6166	61.0424
FBgn0001308	2.36214	0.0469707	50.2895	81.3249	103.895	107.945
FBgn0005658	5.45577	0.108701	50.1908	37.9625	63.8382	68.1102
FBgn0010113	7.43995	0.14874	50.0199	30.8482	13.7114	12.1334
FBgn0027558	5.72119	0.114485	49.9732	20.4107	28.1406	40.1822
FBgn0035868	30.6721	0.615054	49.8689	1.08416	46.7848	3.26908
FBgn0044510	3.18994	0.0639734	49.8635	189.077	256.204	283.915
FBgn0035050	5.20176	0.104356	49.8465	74.3392	117.879	141.152
FBgn0038811	9.13077	0.183343	49.8016	13.1016	13.76	40.3132
FBgn0035249	5.3649	0.107962	49.6924	14.6567	20.8246	28.1516
FBgn0086768	2.91204	0.0586386	49.6608	82.0563	62.3588	101.168
FBgn0033391	12.586	0.253624	49.6245	53.1822	162.905	171.878
FBgn0265052	39.0664	0.78772	49.5944	76.0094	0.507082	26.2632
FBgn0000063	16.7982	0.338987	49.554	3.35454	25.8323	5.14323
FBgn0034585	4.11566	0.083096	49.529	42.8003	61.6423	63.4209
FBgn0032429	3.8872	0.078567	49.4762	76.8314	114.605	61.8288
FBgn0030936	31.6976	0.641387	49.4205	2.09581	1.19153	0.0363217
FBgn0038300	2.67233	0.0541914	49.3128	11.5785	14.95	15.8057
FBgn0027360	23.5191	0.477775	49.2263	14.8851	196.558	9.33455
FBgn0040715	14.02	0.285191	49.1599	2.78314	6.94623	0.767691
FBgn0039730	4.27103	0.0869645	49.1124	77.8884	96.4639	137.878
FBgn0041712	5.54497	0.113252	48.9612	9.33214	7.94445	4.38291
FBgn0062440	6.05046	0.12364	48.9363	190.604	379.278	340.907
FBgn0028411	3.07432	0.0628635	48.9047	37.9481	28.5394	22.3268
FBgn0085396	9.59945	0.196371	48.8843	31.4158	13.8048	11.2633
FBgn0036837	4.27216	0.087452	48.8515	159.189	124.09	91.5761
FBgn0039829	5.79216	0.1188	48.7555	9.5828	12.0578	20.2993
FBgn0034963	5.42669	0.111569	48.6396	41.445	20.7396	27.537
FBgn0030090	8.30338	0.170907	48.5841	37.4864	13.3677	23.5341
FBgn0034045	6.15242	0.126757	48.5371	3.90041	3.15505	1.59503
FBgn0038084	3.61879	0.0746229	48.4944	38.2692	30.8566	53.9306
FBgn0265595	7.74229	0.159689	48.4836	40.4903	118.357	37.0208
FBgn0023523	17.1921	0.35473	48.4653	0.446283	0.600558	5.38918
FBgn0020764	5.03373	0.103981	48.4101	127.008	177.543	240.072
FBgn0053144	4.78105	0.09882	48.3814	78.8373	96.4212	145.307
FBgn0032234	6.58089	0.136115	48.3481	6.17706	10.5933	14.2572
FBgn0024352	3.68991	0.0763516	48.3279	52.4591	76.5671	79.1374
FBgn0030086	3.35271	0.0693809	48.3232	54.3515	69.7646	80.7666
FBgn0037610	3.72842	0.077228	48.2781	30.7742	34.0811	49.6227
FBgn0027338	2.55335	0.0528953	48.2719	160.042	217.445	205.657
FBgn0051223	5.52417	0.114479	48.2548	12.7144	12.0796	24.0798
FBgn0050491	2.91542	0.0604501	48.2286	40.3096	28.1119	29.6731
FBgn0033316	4.83227	0.100283	48.1863	27.9655	16.9867	16.5197
FBgn0040347	5.49039	0.114287	48.0403	3.87178	6.46954	2.7069
FBgn0040078	5.50827	0.114791	47.9853	19.8648	19.9393	42.1759
FBgn0052177	4.11375	0.0858252	47.9318	123.465	168.414	195.137
FBgn0260768	19.5349	0.407871	47.8948	1.83359	5.34762	22.6457
FBgn0039450	2.9217	0.0610382	47.8668	32.3017	45.4172	41.371
FBgn0036908	3.60474	0.0753614	47.8327	47.7225	49.0175	30.2161
FBgn0030521	4.92161	0.10294	47.8102	170.516	255.426	293.939
FBgn0027575	3.77861	0.0790343	47.8098	230.054	344.113	338.584
FBgn0034950	3.35467	0.0702028	47.7854	35.2323	42.5702	55.7382
FBgn0034853	3.99047	0.0838687	47.58	4.69777	6.69416	7.99834
FBgn0025725	2.40892	0.0507458	47.4703	50.6594	54.909	70.0555
FBgn0061515	1.6241	0.0342297	47.4471	199.877	229.988	241.23
FBgn0263397	5.3062	0.111855	47.4383	242.919	466.894	437.012
FBgn0263050	31.9041	0.6731	47.3988	0.791223	0.0795837	12.3374
FBgn0037898	6.10612	0.129	47.3341	18.8671	16.5639	40.8516
FBgn0039911	3.7034	0.0783918	47.2422	449.69	608.579	332.33
FBgn0034945	4.38291	0.092801	47.2292	25.8753	14.1196	25.2359
FBgn0032694	2.34708	0.0497713	47.1572	41.2744	53.1741	53.1988
FBgn0032002	10.0478	0.213081	47.1549	11.933	30.4448	34.2432
FBgn0033687	9.47212	0.200984	47.1286	7.31197	2.35738	6.42679
FBgn0038651	3.77156	0.0802517	46.9967	15.5279	18.3026	26.8725
FBgn0033616	3.44803	0.073422	46.9618	20.4246	29.1945	30.3382
FBgn0032911	3.3681	0.0718738	46.8613	44.0169	63.3309	57.4718
FBgn0017418	5.05994	0.108019	46.8433	82.5182	152.262	139.676
FBgn0019637	8.1396	0.174151	46.7389	4.74663	20.7419	14.228
FBgn0038981	10.8736	0.232754	46.7171	1.85394	5.10713	7.56203
FBgn0004087	11.7577	0.251819	46.6908	9.54944	2.39209	3.64895
FBgn0032454	4.05777	0.0870798	46.5984	32.884	43.9823	56.3223
FBgn0000064	2.34631	0.0503788	46.5735	890.044	1141.37	1157.82
FBgn0002521	5.65978	0.121548	46.5643	100.847	154.303	207.659
FBgn0034067	9.28707	0.199538	46.5429	1.65814	3.24802	6.30359
FBgn0001108	5.72206	0.122992	46.524	41.1346	72.8115	74.9624
FBgn0034447	5.03551	0.10835	46.4745	4.22188	8.21869	3.8997
FBgn0035879	3.0073	0.0648173	46.3966	83.6541	106.559	122.868
FBgn0000499	2.94014	0.0634085	46.3682	45.0133	51.8439	65.4948
FBgn0025835	15.0765	0.325284	46.3487	2.36251	2.2121	0.34694
FBgn0011570	2.39294	0.0516333	46.3449	41.2999	44.0878	58.8283
FBgn0030672	3.73394	0.0806591	46.2929	97.6697	140.047	140.362
FBgn0038597	6.25483	0.135393	46.1977	8.10804	15.3553	16.816
FBgn0042094	4.5564	0.0986574	46.184	16.5366	24.8575	27.2945
FBgn0038741	6.2321	0.134976	46.1717	6.75825	2.97438	6.6576
FBgn0010222	7.73486	0.167752	46.1088	21.1362	52.6217	15.7504
FBgn0284444	27.357	0.593732	46.0763	1.12059	0.101711	0.169341
FBgn0029840	4.20984	0.091778	45.8699	18.7524	24.3259	30.8575
FBgn0267488	3.70627	0.0808812	45.8237	13.1384	17.3669	19.5374
FBgn0040373	7.42812	0.162128	45.8165	0.606188	0.538049	1.7001
FBgn0033942	17.4203	0.380571	45.774	2.50829	24.8694	2.20803
FBgn0031039	6.32377	0.138237	45.7459	24.9796	19.2302	50.3994
FBgn0034231	6.62487	0.144846	45.7372	16.1373	18.3456	37.1441
FBgn0030217	4.14426	0.0906678	45.7082	7.15646	4.48419	8.36136
FBgn0034788	3.48547	0.0764226	45.6078	55.6409	66.046	89.5218
FBgn0034454	28.1302	0.618054	45.5141	0	0	1.00358
FBgn0030066	6.18646	0.135933	45.5111	17.1518	23.0839	40.2676
FBgn0259178	2.05999	0.0453429	45.4312	89.7198	110.83	111.057
FBgn0030318	4.57103	0.100615	45.4309	13.3437	17.02	23.7537
FBgn0033195	7.17483	0.15805	45.3959	6.15161	2.67018	7.78593
FBgn0032691	3.72705	0.0821253	45.3825	8.38281	11.75	12.9154
FBgn0036973	3.66049	0.0806743	45.3737	16.6387	18.5809	10.5127
FBgn0035112	13.2457	0.29201	45.3605	41.842	30.7646	6.56933
FBgn0052391	59.0398	1.30261	45.3241	0	0.679577	4.39248
FBgn0015790	2.94613	0.0651851	45.1963	250.591	348.479	333.452
FBgn0051712	4.58188	0.101511	45.1366	340.56	581.177	538.742
FBgn0038397	21.4533	0.475935	45.0761	0.86245	0.321549	18.3193
FBgn0038590	4.1244	0.0914997	45.0756	20.3179	12.4242	13.1976
FBgn0039420	3.12624	0.0694321	45.0259	49.8785	65.117	71.7723
FBgn0030554	6.28135	0.13953	45.0178	5.2355	8.55133	10.4964
FBgn0039136	4.16254	0.0925733	44.9648	34.2544	17.8375	43.1857
FBgn0028982	4.11057	0.0915559	44.8968	50.9579	58.9437	86.4354
FBgn0003302	4.88654	0.109008	44.8272	32.5268	23.7527	49.3027
FBgn0033566	5.28146	0.117837	44.8201	31.1128	23.9781	53.3111
FBgn0030087	3.54575	0.0792493	44.7417	84.3985	113.71	130.54
FBgn0003002	2.21814	0.0495892	44.7304	9.24855	12.3239	12.2041
FBgn0038704	7.36557	0.164881	44.6721	40.4972	17.8071	55.0343
FBgn0036104	4.71439	0.105569	44.6568	49.279	65.9934	89.8873
FBgn0086707	4.6032	0.103183	44.6121	17.6084	28.968	28.7467
FBgn0039916	9.98738	0.224167	44.5532	4.23559	4.28485	0.998742
FBgn0032247	9.95809	0.223708	44.5139	9.12589	15.1752	35.1978
FBgn0011710	3.57414	0.0803963	44.4565	34.2089	47.3059	54.0288
FBgn0040071	5.17532	0.116588	44.3898	43.0479	51.2375	82.2474
FBgn0037084	2.63855	0.0594464	44.3854	229.568	303.881	301.099
FBgn0053481	4.00579	0.0902611	44.38	342.84	475.319	252.035
FBgn0032643	2.58167	0.0581895	44.3667	33.3918	41.9522	47.8703
FBgn0263240	19.5831	0.441734	44.3324	5.23168	0.49789	0.75748
FBgn0040364	18.0722	0.408796	44.2084	10.3476	4.91484	75.05
FBgn0259818	3.40317	0.0769875	44.2042	20.0657	15.1178	26.7783
FBgn0262102	25.1294	0.56857	44.1976	1.44657	10.2381	26.6825
FBgn0025693	27.0554	0.612238	44.191	8.03794	2.11679	0.30376
FBgn0037526	5.45448	0.123499	44.1664	12.9918	7.60037	18.8706
FBgn0030122	4.84688	0.109786	44.1484	11.5322	18.1745	19.1871
FBgn0038429	5.72285	0.129667	44.1348	14.1593	23.9886	27.2622
FBgn0038420	5.97072	0.135317	44.124	42.1649	21.0774	22.0379
FBgn0023513	8.44645	0.191666	44.0685	4.15004	5.43447	1.3633
FBgn0052699	6.30638	0.143111	44.0665	48.7416	84.3688	103.778
FBgn0030645	4.40861	0.100173	44.0101	16.8789	18.9409	10.1712
FBgn0030509	63.2682	1.43813	43.9932	0	3.74163	2.69109
FBgn0031309	4.75874	0.108265	43.9544	7.46415	8.03298	13.0803
FBgn0030137	10.1886	0.232123	43.8932	9.17685	21.5628	4.25007
FBgn0036619	26.6512	0.607238	43.8892	0.773022	11.2391	0.0883593
FBgn0026582	7.99881	0.182553	43.8163	23.3831	32.4275	66.0596
FBgn0037019	2.65741	0.0606527	43.8137	19.7848	24.881	15.2061
FBgn0038593	3.52918	0.080553	43.8119	14.307	15.0487	21.984
FBgn0038371	15.4277	0.35216	43.8087	2.90244	1.68788	16.8881
FBgn0050091	61.3722	1.40199	43.7752	0	0.253953	7.39491
FBgn0040319	5.82416	0.133066	43.7691	64.3638	107.926	132.665
FBgn0263605	5.08675	0.116285	43.7438	9.37123	13.0244	17.6056
FBgn0031048	4.8426	0.110706	43.743	103.714	180.643	151.933
FBgn0033479	5.16857	0.118245	43.7106	3.98158	3.14302	6.92688
FBgn0037200	8.92893	0.206521	43.235	6.63052	7.62145	22.6198
FBgn0053177	29.3267	0.679402	43.1655	0.853249	1.73131	0.069575
FBgn0037884	2.46855	0.0571958	43.1595	56.3455	73.9684	74.0445
FBgn0286199	15.0129	0.348227	43.1125	0.626719	1.73225	0.179891
FBgn0027592	2.57251	0.0596924	43.096	22.9178	31.7384	27.9268
FBgn0087012	7.36375	0.170949	43.0758	26.1297	36.6077	69.3571
FBgn0031146	16.7328	0.389262	42.9859	4.83391	25.2179	29.6135
FBgn0031454	13.3896	0.311529	42.9803	31.5306	171.262	59.0055
FBgn0032475	4.07158	0.0949741	42.8704	30.2152	32.1316	51.2623
FBgn0026189	5.46371	0.127474	42.8613	104.841	186.02	173.079
FBgn0259718	27.4534	0.640592	42.8563	0.584152	22.138	27.8858
FBgn0036333	3.55571	0.0831319	42.7719	41.8275	28.3925	28.4782
FBgn0035900	3.82936	0.0896863	42.6973	46.6473	71.6829	64.2921
FBgn0035085	11.3972	0.267385	42.6248	2.9506	2.21183	12.8333
FBgn0040236	3.83899	0.0900949	42.6105	24.5094	32.0966	38.9033
FBgn0035504	4.35528	0.102286	42.5792	25.7211	28.5422	46.1741
FBgn0003411	62.5334	1.46936	42.5581	0	0	9.64317
FBgn0030946	2.91241	0.0684541	42.5454	37.0461	53.4552	42.5112
FBgn0035812	13.0968	0.307956	42.5281	3.78301	0.901128	0.981774
FBgn0027081	3.94042	0.0926929	42.5104	94.6293	133.472	157.618
FBgn0031119	16.6099	0.390804	42.5018	88.9433	12.672	14.6881
FBgn0004619	3.1297	0.0737443	42.4399	69.2473	87.1688	103.085
FBgn0023023	3.42483	0.0808523	42.3591	177.176	186.426	111.95
FBgn0031098	4.35609	0.103058	42.2683	18.1174	21.6768	11.2843
FBgn0031315	4.55432	0.107868	42.2214	35.4318	37.7514	64.7683
FBgn0024179	3.15343	0.0747588	42.1814	55.3017	74.8049	77.5916
FBgn0035138	16.0612	0.380865	42.1703	1.86147	14.4198	3.47503
FBgn0262477	8.28736	0.197354	41.9924	199.596	375.243	506.561
FBgn0038803	4.69219	0.11188	41.9397	63.6848	34.9831	45.0947
FBgn0037609	3.18634	0.0759858	41.9333	36.1351	36.8409	54.2361
FBgn0032848	22.4994	0.536654	41.9254	1.39892	0.11213	2.22115
FBgn0042092	5.71383	0.136358	41.903	6.57923	14.2612	9.33786
FBgn0037690	3.87291	0.0924831	41.8769	106.745	136.756	179.695
FBgn0031299	5.97211	0.142768	41.8308	82.2146	139.561	164.466
FBgn0037655	1.68615	0.0403153	41.824	133.636	153.093	164.266
FBgn0033015	2.99946	0.0717178	41.8231	91.7749	85.3482	131.227
FBgn0035632	5.33824	0.127675	41.8111	15.0163	28.2153	25.5929
FBgn0039733	3.6403	0.087094	41.7973	39.4943	59.4478	56.4614
FBgn0031999	16.1078	0.385586	41.7749	0.937293	2.02169	7.43727
FBgn0038381	21.1983	0.507772	41.7476	11.2796	8.46971	0.843865
FBgn0038139	9.10226	0.218306	41.695	4.42955	8.59294	13.2533
FBgn0262117	5.2341	0.125578	41.68	74.2429	119.869	136.856
FBgn0031240	14.3661	0.344707	41.6762	7.51148	2.53418	1.20372
FBgn0052536	5.67655	0.136215	41.6736	12.6937	21.1557	22.748
FBgn0031250	15.9659	0.383212	41.6635	19.8369	147.413	26.3676
FBgn0022361	7.46634	0.179277	41.647	294.538	561.587	700.098
FBgn0037716	3.73788	0.0897673	41.6396	13.5707	19.0437	22.634
FBgn0027513	8.95705	0.215358	41.5915	3.19921	3.22121	9.96779
FBgn0003510	9.47993	0.228355	41.5141	2.01957	6.80063	1.96283
FBgn0031493	3.32671	0.0801937	41.4835	34.416	49.2609	53.7734
FBgn0017577	19.539	0.471493	41.4408	0.722902	3.0821	9.12593
FBgn0028932	3.61384	0.0874999	41.3011	23.7859	35.8954	35.3498
FBgn0051183	3.84574	0.0931769	41.2736	8.18584	9.73425	13.751
FBgn0038129	3.61279	0.0876053	41.2394	17.1291	25.4193	22.9704
FBgn0033463	4.91085	0.119142	41.2185	179.448	326.63	220.09
FBgn0040285	4.28508	0.104005	41.2006	63.8202	95.3276	102.133
FBgn0037943	3.33774	0.08103	41.1914	39.4326	33.5651	24.1704
FBgn0042083	4.94452	0.120184	41.1412	4.9493	2.87856	5.50352
FBgn0283473	6.84008	0.166351	41.1185	47.1555	82.3342	99.3754
FBgn0261794	3.34836	0.0814453	41.1117	950.603	1339.78	1327.73
FBgn0027343	16.7706	0.408188	41.0855	2.07836	0.179039	1.93289
FBgn0038861	4.65109	0.113286	41.0561	25.0609	15.5586	14.9364
FBgn0085446	3.48431	0.0848806	41.0495	12.3668	18.8815	10.557
FBgn0014007	3.61375	0.0880656	41.0348	25.1059	34.324	39.3779
FBgn0040786	12.9542	0.317331	40.8223	9.18205	5.35215	2.04517
FBgn0031379	4.25374	0.104242	40.8065	52.297	69.7245	86.5217
FBgn0284257	5.09456	0.125023	40.7492	133.893	194.928	254.436
FBgn0259481	4.50868	0.111032	40.6071	112.333	197.474	161.158
FBgn0260004	14.6112	0.36019	40.5653	1.76512	0.250237	0.448531
FBgn0037384	6.50882	0.160512	40.5504	21.4698	26.1473	49.7483
FBgn0037757	4.45994	0.110236	40.4582	31.3598	55.0282	42.321
FBgn0038390	11.6748	0.289363	40.3467	0.792729	1.27067	3.5291
FBgn0038365	12.6006	0.312328	40.344	3.00376	7.09515	15.8474
FBgn0038165	8.08524	0.20052	40.3214	51.8019	120.08	142.722
FBgn0030006	3.13178	0.0777374	40.2867	17.4828	25.9107	15.9479
FBgn0259241	4.97532	0.123532	40.2754	74.4832	60.7757	134.064
FBgn0030004	2.85939	0.0712076	40.1556	12.6114	17.9293	11.6493
FBgn0038870	4.7768	0.118982	40.1472	11.5477	17.9097	21.1374
FBgn0033474	6.29796	0.157029	40.1069	29.7885	44.2106	62.6716
FBgn0033902	2.6049	0.064954	40.1038	325.795	375.152	245.112
FBgn0003386	8.55892	0.213685	40.0539	70.3119	156.862	210.264
FBgn0031093	5.17655	0.129336	40.024	29.5686	30.4815	15.246
FBgn0036911	3.83505	0.0960096	39.9445	68.3986	40.8075	59.7439
FBgn0038432	1.49204	0.0373678	39.9284	34.738	37.5321	44.5743
FBgn0038244	5.5833	0.140099	39.8524	65.1368	32.0038	60.0565
FBgn0283472	4.00467	0.10053	39.8354	48.7663	30.4001	31.453
FBgn0014010	2.15372	0.0540708	39.8314	263.365	297.653	370.918
FBgn0262141	18.1026	0.454611	39.82	0.806027	1.66208	10.1294
FBgn0025724	3.05871	0.0768455	39.8034	44.0703	58.0598	64.5339
FBgn0263933	2.61881	0.0658268	39.7833	48.2215	60.6065	63.4633
FBgn0015829	4.53928	0.114231	39.7377	41.8089	75.6978	44.4997
FBgn0033724	16.8809	0.424969	39.7227	1.16923	1.05806	0.333678
FBgn0032921	3.97497	0.100079	39.7182	14.3034	24.6137	19.1057
FBgn0015396	6.57922	0.165675	39.7116	8.99368	9.10586	3.60404
FBgn0266674	3.13158	0.0788649	39.7082	18.0857	18.1236	27.5436
FBgn0035542	2.18291	0.0550029	39.6871	357.801	364.423	479.664
FBgn0032688	3.39702	0.0856897	39.6433	22.1672	33.0666	28.8224
FBgn0027616	2.94932	0.0745315	39.5714	267.416	322.702	395.638
FBgn0035101	3.61045	0.0913768	39.5117	89.7773	65.87	120.125
FBgn0027549	1.76183	0.0446334	39.4733	43.3666	40.5144	53.3159
FBgn0033350	2.03028	0.0514588	39.4544	24.9615	19.6862	28.9575
FBgn0010504	17.0937	0.433488	39.4329	6.19432	3.13657	42.0952
FBgn0001992	14.5778	0.369892	39.4109	1.50031	6.32806	0.553182
FBgn0262719	27.497	0.697865	39.4016	0.571283	14.0742	0.261962
FBgn0026479	3.32981	0.084567	39.3748	94.0034	111.508	139.314
FBgn0015924	5.80746	0.147512	39.3694	57.1141	125.649	78.7146
FBgn0030704	3.58198	0.0910009	39.3621	66.2017	42.699	45.4037
FBgn0026869	11.678	0.296907	39.3322	54.9512	99.7216	257.049
FBgn0032104	33.2794	0.848148	39.2377	0.359537	31.5763	3.71125
FBgn0040397	2.36795	0.0604045	39.2016	16.6394	21.914	21.4302
FBgn0003889	22.6546	0.577972	39.1967	3.31004	56.3022	26.3211
FBgn0010488	3.76352	0.0960446	39.1851	163.639	262.508	227.889
FBgn0034091	3.58437	0.0916144	39.1246	73.6014	86.5024	120.045
FBgn0000552	10.5793	0.2706	39.0957	0.740172	0.426377	2.70485
FBgn0037182	2.82826	0.0723423	39.0955	41.0007	61.2326	43.0352
FBgn0004514	3.06758	0.0785256	39.0647	30.1097	40.4569	40.9189
FBgn0032858	2.67219	0.0684563	39.035	20.7929	13.9633	22.8407
FBgn0259990	27.0429	0.692892	39.029	0.245867	11.0344	8.08696
FBgn0030558	17.4994	0.44838	39.028	3.75361	4.74183	41.9594
FBgn0032214	2.31784	0.0594566	38.9837	56.6647	64.3103	78.0497
FBgn0034737	10.9999	0.28233	38.961	7.08704	2.78641	15.3024
FBgn0033186	5.10538	0.131043	38.9595	5.56152	8.00613	10.63
FBgn0023216	4.16235	0.106864	38.9501	19.7175	29.5924	30.5297
FBgn0027930	13.5191	0.347256	38.9313	7.24213	43.1882	7.85429
FBgn0031062	5.3493	0.137487	38.9077	8.04882	17.0926	10.5109
FBgn0037279	2.48856	0.0639708	38.9014	30.4756	38.6582	40.9238
FBgn0037623	3.51754	0.0904505	38.8891	40.5552	33.8009	60.6034
FBgn0033423	28.9172	0.744309	38.8511	0.426391	22.07	1.08285
FBgn0005411	3.16024	0.0813452	38.8498	100.345	106.694	150.032
FBgn0031604	5.04224	0.12981	38.8431	19.4209	34.2224	30.9824
FBgn0028836	2.35909	0.0607354	38.842	71.1017	56.3913	85.5057
FBgn0050172	2.78826	0.0717896	38.8394	505.919	334.63	436.164
FBgn0001220	2.84818	0.073365	38.8221	218.635	307.776	274.893
FBgn0004108	3.28004	0.0846854	38.7321	41.363	44.2845	63.5387
FBgn0016038	2.03035	0.0524381	38.7191	69.1677	88.4938	63.4033
FBgn0040080	2.74046	0.0708626	38.6728	32.7603	37.8028	45.8128
FBgn0038989	4.6449	0.120195	38.6447	11.4385	18.3217	19.3307
FBgn0051108	3.75274	0.0971571	38.6254	33.4461	51.0424	48.6705
FBgn0260450	7.65709	0.198324	38.609	1.88011	1.57168	4.86835
FBgn0051612	13.0397	0.338466	38.5258	1.70806	5.95604	8.52
FBgn0037980	3.41114	0.0886158	38.4936	11.6061	14.0865	18.1036
FBgn0052649	5.25352	0.136569	38.4679	14.4936	14.6794	27.0736
FBgn0014006	4.21388	0.109563	38.4609	18.2292	24.039	31.8193
FBgn0022935	3.27429	0.0851475	38.4543	31.8305	46.259	41.7926
FBgn0029750	32.0481	0.833427	38.4533	0.0614403	0.0141167	2.47112
FBgn0038016	3.74477	0.097392	38.4504	33.1879	46.8603	25.1209
FBgn0029893	5.28878	0.137586	38.4399	41.6394	65.4834	73.9166
FBgn0033235	1.8868	0.0490926	38.4335	51.407	64.655	60.0255
FBgn0000662	2.12228	0.055222	38.4318	103.339	137.919	129.047
FBgn0036396	3.58851	0.0933865	38.4264	10.4217	16.3316	13.4102
FBgn0051528	10.2961	0.268045	38.412	19.8243	6.95917	6.79633
FBgn0037750	16.2732	0.42376	38.4019	3.28562	1.09103	0.332538
FBgn0039169	3.6243	0.0944476	38.3737	11.5071	18.9035	17.3341
FBgn0030319	21.4457	0.559067	38.3598	0.585308	4.49684	7.04128
FBgn0031876	7.96124	0.207791	38.3137	8.97442	5.62324	3.2959
FBgn0022960	5.08428	0.13273	38.3056	31.7445	49.8456	56.5983
FBgn0013334	5.67014	0.148082	38.2905	668.556	1119.12	1353.03
FBgn0025832	5.72452	0.149611	38.2628	5.00013	4.30848	10.3841
FBgn0034271	3.31461	0.0866324	38.2607	27.91	35.214	41.6982
FBgn0262358	32.5469	0.851364	38.2291	1.04143	0.0755938	0.0428854
FBgn0000711	4.3781	0.114696	38.1713	165.138	205.579	307.274
FBgn0040993	23.3033	0.610512	38.1701	0.262668	1.79107	1.27429
FBgn0024958	5.72819	0.15019	38.1396	47.15	40.9581	23.2214
FBgn0031474	3.22389	0.0845822	38.1155	115.526	157.24	163.25
FBgn0036372	2.72562	0.0715994	38.0677	43.1725	51.9766	61.0369
FBgn0030863	1.1858	0.0311559	38.0601	139.092	121.023	155.644
FBgn0031848	29.1471	0.765901	38.0559	0.316997	6.87224	5.26311
FBgn0036882	4.43042	0.116585	38.0016	114.173	73.773	69.4959
FBgn0035470	1.81097	0.0476607	37.9972	24.6911	32.046	29.8693
FBgn0001222	2.92671	0.0770348	37.9921	72.0081	98.654	95.5268
FBgn0030418	7.56074	0.199281	37.94	27.3626	48.1681	14.5212
FBgn0037660	2.55509	0.0674155	37.9006	40.3416	48.4535	54.1576
FBgn0039115	3.83147	0.10128	37.8304	27.3298	22.1144	16.2751
FBgn0284442	10.2181	0.270109	37.8294	1.48996	1.49915	5.20432
FBgn0031239	8.72391	0.230636	37.8254	34.9249	26.2521	99.4389
FBgn0023508	2.47085	0.0653565	37.8058	51.4174	52.9689	70.8363
FBgn0029708	3.00731	0.0796246	37.7687	273.117	320.884	193.409
FBgn0036286	1.6394	0.0435597	37.6357	32.401	40.2204	34.7078
FBgn0032222	3.18093	0.0847275	37.5431	104.164	127.978	158.972
FBgn0031321	5.00016	0.133218	37.5337	9.73152	4.74253	9.33445
FBgn0035995	2.67033	0.0711515	37.5301	69.4869	84.338	97.7574
FBgn0030638	4.57835	0.122009	37.5246	13.4879	22.6371	22.1011
FBgn0052351	43.5036	1.16014	37.4987	0	1.18746	0
FBgn0033971	2.04229	0.0545741	37.4224	23.4408	28.3078	30.0393
FBgn0051627	13.9709	0.373341	37.4212	10.2673	1.87131	17.574
FBgn0002872	8.138	0.217836	37.3584	6.59718	18.7205	9.44652
FBgn0031216	7.37939	0.197547	37.3552	68.1272	46.7184	23.8733
FBgn0023541	19.3805	0.519062	37.3376	0.592028	3.1938	6.31357
FBgn0035099	10.5178	0.282064	37.2886	3.40811	1.10562	5.56929
FBgn0051852	5.10762	0.137153	37.2404	26.3602	34.1476	48.9722
FBgn0035996	6.26855	0.168479	37.2068	3.7371	8.46039	4.8051
FBgn0013263	7.18446	0.19314	37.1982	65.7326	129.556	138.797
FBgn0000319	2.7403	0.0736761	37.1939	187.235	257.617	254.434
FBgn0029980	5.76665	0.155069	37.1876	16.7415	27.7087	32.4537
FBgn0039855	25.9182	0.697108	37.1796	1.67423	0.559938	26.0546
FBgn0043900	2.68007	0.0720908	37.1762	22.6742	30.7684	30.5608
FBgn0030668	3.05001	0.0820564	37.1697	46.4124	33.6133	33.0252
FBgn0027505	3.64795	0.098261	37.1251	12.0631	13.8437	19.0848
FBgn0037850	10.1248	0.272963	37.0923	4.05474	16.8343	5.3149
FBgn0025825	58.0153	1.56419	37.0896	0.229878	35.2371	46.5442
FBgn0039714	4.34489	0.117162	37.0846	45.0218	60.1747	78.4672
FBgn0030474	5.29138	0.14278	37.0598	20.8041	36.7501	31.5054
FBgn0259707	3.49041	0.0943654	36.9882	189.388	208.451	341.85
FBgn0041245	49.4897	1.33862	36.9707	0	5.93822	0.0870382
FBgn0037234	3.67961	0.0995454	36.9642	72.542	55.6106	104.583
FBgn0027654	1.95848	0.0530298	36.9316	1114.23	1050.14	1415.32
FBgn0030642	2.63172	0.0713383	36.8907	27.4402	20.0442	30.2766
FBgn0037616	6.52451	0.177047	36.8518	1.57645	2.53188	3.76882
FBgn0262519	3.8633	0.104877	36.8363	60.5846	76.9557	96.6756
FBgn0034460	13.1921	0.358164	36.8326	3.62605	1.25225	0.582764
FBgn0033178	5.50262	0.149883	36.7127	30.6782	17.7376	43.9049
FBgn0052533	2.18029	0.0594015	36.7042	15.0612	14.6456	10.8859
FBgn0038578	3.55565	0.09704	36.6411	14.4933	21.3813	21.4807
FBgn0028499	3.4593	0.0944313	36.633	49.5518	71.4464	72.5409
FBgn0034197	10.4196	0.285076	36.5503	3.16801	8.26151	1.57186
FBgn0034379	2.31499	0.0633785	36.5264	11.2217	13.4234	9.4206
FBgn0034937	5.60328	0.153531	36.4962	1.73566	3.44025	3.49911
FBgn0000442	9.47302	0.259647	36.4842	5.43056	1.86794	4.82405
FBgn0037370	7.52483	0.206281	36.4785	23.2313	11.6515	37.7998
FBgn0030891	2.95545	0.0810296	36.4737	25.9216	31.8438	35.6623
FBgn0015818	2.90763	0.0798512	36.4131	13.8025	15.5974	20.4832
FBgn0019960	2.80003	0.0769298	36.3972	154.653	182.385	221.147
FBgn0050051	9.06254	0.249367	36.3422	21.6902	7.30331	29.2513
FBgn0031683	2.27064	0.0625023	36.3289	261.085	293.575	351.142
FBgn0037624	5.46905	0.150565	36.3235	36.0595	40.4665	76.3067
FBgn0004587	3.07612	0.0847523	36.2955	447.619	391.903	636.958
FBgn0024238	3.32395	0.0915961	36.2892	158.632	226.029	226.554
FBgn0283666	2.66916	0.0737231	36.2053	130.487	173.642	193.895
FBgn0041621	48.9312	1.35269	36.1733	2.56618	0.802457	0
FBgn0261801	3.79544	0.105142	36.0981	5.83261	8.9387	7.92958
FBgn0036145	9.07045	0.251502	36.0651	695.696	214.178	581.942
FBgn0037578	4.1323	0.114634	36.0478	22.3324	14.2881	13.3461
FBgn0038947	2.99668	0.0831801	36.0264	163.714	224.243	233.802
FBgn0010894	3.12231	0.0867815	35.9789	14.2159	18.7246	20.2619
FBgn0015268	5.66516	0.157518	35.9651	219.9	465.542	282.455
FBgn0037713	8.20303	0.228294	35.9319	12.5857	12.2366	35.6742
FBgn0042180	3.82761	0.106608	35.9037	31.3617	41.2422	48.3072
FBgn0032514	5.59057	0.15595	35.8486	14.6085	25.3102	26.2924
FBgn0029161	4.67905	0.130541	35.8434	117.627	217.02	152.713
FBgn0002774	5.37223	0.150169	35.7747	90.4387	65.68	155.075
FBgn0023094	7.86811	0.220235	35.726	40.5044	59.309	119.466
FBgn0026262	5.12732	0.143774	35.6624	153.362	290.117	236.176
FBgn0032797	3.18359	0.0892732	35.6612	2219.71	3225.78	2038.88
FBgn0032153	3.59363	0.100778	35.659	14.241	21.1048	20.4651
FBgn0037224	47.2255	1.32447	35.6561	0.0610766	0	5.28825
FBgn0005666	21.2631	0.596429	35.6507	0.437799	0.216514	5.97383
FBgn0260399	23.0605	0.647064	35.6386	0.0990467	0.59221	1.66155
FBgn0032845	3.22055	0.0903878	35.6303	33.3379	31.2242	22.1768
FBgn0039870	5.51255	0.154831	35.6036	22.4892	14.5116	10.9962
FBgn0032117	7.67678	0.216037	35.5345	10.8418	9.9971	4.14109
FBgn0051357	4.02427	0.113346	35.5042	50.9566	75.7899	78.2337
FBgn0061469	3.34208	0.0941992	35.4789	30.3068	42.723	39.2152
FBgn0000256	3.35452	0.094612	35.4556	69.0744	90.3051	49.6136
FBgn0037708	5.13851	0.145089	35.4163	14.9807	11.2472	25.2274
FBgn0015781	3.18044	0.0898046	35.4151	79.3899	74.6051	117.85
FBgn0034246	4.24727	0.119992	35.3963	12.5924	22.0417	15.5036
FBgn0036211	2.50589	0.0708421	35.3729	281.923	375.971	356.707
FBgn0050001	24.992	0.706772	35.3607	1.02633	0.436398	16.0113
FBgn0250830	4.88048	0.138079	35.3456	103.134	102.603	206.548
FBgn0023416	6.17047	0.174575	35.3456	161.516	219.431	371.952
FBgn0039067	3.10089	0.0877826	35.3246	14.6857	21.0775	18.6906
FBgn0037824	4.20072	0.119462	35.1636	6.129	5.76215	3.30745
FBgn0032512	4.40174	0.125208	35.1553	13.6624	21.3427	22.384
FBgn0033029	4.00441	0.113955	35.1404	94.3162	118.948	164.854
FBgn0044872	18.6248	0.530232	35.1258	3.88375	3.64792	36.8575
FBgn0017430	5.60374	0.159559	35.1202	40.35	66.1155	77.9314
FBgn0032789	20.7061	0.589652	35.1159	0.298606	2.49485	3.47781
FBgn0085236	28.7069	0.817503	35.1154	0.477602	3.20551	0.0583554
FBgn0030778	3.58536	0.102121	35.1089	282.501	431.399	253.865
FBgn0036039	3.8052	0.108392	35.106	46.8427	62.3251	77.827
FBgn0032851	31.342	0.89307	35.0946	0.529097	1.6124	0.0268359
FBgn0041781	6.13081	0.174799	35.0734	97.3869	194.431	172.905
FBgn0027359	4.68225	0.133632	35.0384	126.994	75.1053	75.8357
FBgn0260442	5.06354	0.14452	35.037	83.8365	135.538	173.362
FBgn0263934	4.55811	0.130162	35.0187	26.7326	14.0144	22.4878
FBgn0032485	3.7041	0.105859	34.9908	61.5048	70.5438	95.6971
FBgn0261986	5.101	0.145866	34.9704	52.5702	93.7121	87.1833
FBgn0032013	2.31338	0.0661541	34.9696	128.469	177.926	147.87
FBgn0264894	9.9008	0.283339	34.9433	3.49647	1.19009	1.3498
FBgn0036376	3.17172	0.0907775	34.9395	18.3675	25.4343	15.2986
FBgn0261850	3.98804	0.1142	34.9214	6.81973	10.4236	10.7497
FBgn0001084	5.7616	0.1651	34.8976	7.41778	10.7296	4.02078
FBgn0261680	27.6121	0.791765	34.8741	7.77229	8.04287	0.210019
FBgn0259216	23.6156	0.677831	34.8399	26.1254	63.489	2.31318
FBgn0035036	3.86647	0.110984	34.838	16.6519	22.6234	25.9826
FBgn0266916	13.3156	0.382545	34.808	2.19528	1.56802	10.6724
FBgn0259231	2.21525	0.063695	34.779	14.1925	19.1097	15.9884
FBgn0021856	1.95816	0.0563812	34.7307	67.117	51.1292	69.7048
FBgn0014023	4.98378	0.143509	34.7281	70.2261	77.288	143.732
FBgn0032513	3.05552	0.0879985	34.7224	30.4418	29.8895	45.5399
FBgn0029857	3.7877	0.109124	34.71	32.995	32.5585	53.0874
FBgn0083992	19.3043	0.556234	34.7053	62.6425	5.0876	18.495
FBgn0001150	7.33615	0.211418	34.6997	27.466	69.9725	25.3302
FBgn0002891	13.4159	0.386763	34.6876	3.26514	15.6207	9.11308
FBgn0033808	6.78322	0.195683	34.6644	18.2302	32.8526	44.2848
FBgn0028434	10.4079	0.300638	34.6195	6.3653	5.84767	22.0591
FBgn0031143	7.09625	0.205003	34.6153	39.4593	46.537	104.637
FBgn0037134	5.72785	0.165476	34.6143	127.313	96.1023	230.069
FBgn0038552	4.70806	0.136085	34.5964	22.5891	15.9947	35.1557
FBgn0085191	46.0564	1.33345	34.5394	0	0.0676511	1.9833
FBgn0027561	2.79276	0.080924	34.5109	75.6865	104.845	95.3263
FBgn0030352	3.48827	0.101131	34.4927	31.2411	50.4347	40.1126
FBgn0261020	3.70263	0.107431	34.4652	35.0039	46.4906	58.4777
FBgn0023167	3.86298	0.11211	34.457	25.9771	37.4418	43.2884
FBgn0037714	11.8789	0.345429	34.3888	5.64802	23.445	4.35191
FBgn0031434	28.2782	0.823289	34.3479	13.357	4.63598	0.350481
FBgn0264743	8.21724	0.23934	34.3329	70.2871	164.578	192.952
FBgn0030239	8.33586	0.242858	34.324	11.785	7.19716	3.42791
FBgn0030141	3.40302	0.0992447	34.2892	25.3301	31.2069	39.2489
FBgn0261434	10.8386	0.316531	34.2417	0.486707	0.205374	1.25774
FBgn0028467	3.34208	0.0976344	34.2305	29.4288	35.4699	44.441
FBgn0010314	5.85766	0.171147	34.2259	2.75561	5.07347	4.54417
FBgn0033188	5.2689	0.154153	34.1796	257.123	526.051	442.828
FBgn0032393	2.73087	0.0800465	34.116	70.8589	101.739	93.6552
FBgn0026760	23.1224	0.678266	34.0905	0.305883	5.69792	2.82885
FBgn0015288	4.33189	0.127112	34.0793	1547.4	884.104	1103.28
FBgn0283509	1.79195	0.0526244	34.0518	319.5	399.682	389.217
FBgn0004638	2.95163	0.0866824	34.051	59.7768	78.4485	88.6761
FBgn0033297	58.8188	1.72896	34.0196	0	0.00965923	22.3442
FBgn0051897	25.5851	0.752965	33.9792	3.00104	4.32952	0.187204
FBgn0042630	4.36926	0.128653	33.9615	34.7867	43.7608	59.12
FBgn0039232	4.94557	0.145657	33.9536	127.364	243.745	178.039
FBgn0000117	1.90595	0.0561781	33.9269	419.394	511.458	512.959
FBgn0050476	8.74538	0.257774	33.9265	54.619	36.0795	138.595
FBgn0029791	12.4651	0.367496	33.9191	11.0617	2.25852	2.97989
FBgn0033187	3.26541	0.0962953	33.9103	19.2232	28.7748	18.5288
FBgn0033548	5.5194	0.162941	33.8736	26.3325	43.2884	55.6846
FBgn0032481	4.9499	0.146329	33.8272	14.3297	20.4722	25.2611
FBgn0033240	3.17833	0.0940704	33.7867	19.705	17.033	28.9885
FBgn0038087	8.21459	0.243238	33.7719	63.434	23.2693	61.1225
FBgn0030456	7.82864	0.232101	33.7295	6.6049	17.0706	11.994
FBgn0034961	3.08781	0.0916255	33.7003	27.6011	29.2263	40.4158
FBgn0035243	5.49119	0.163028	33.6825	16.5083	34.5693	23.1788
FBgn0034519	28.9195	0.859527	33.6458	0.545302	22.7405	3.55946
FBgn0031070	30.9849	0.920943	33.6447	0.362543	5.12302	0.0287796
FBgn0028969	2.42929	0.0722402	33.6279	67.4888	82.4345	94.736
FBgn0033705	9.02884	0.268625	33.6114	2.85572	1.81903	0.776063
FBgn0001990	6.31182	0.187902	33.591	10.5605	16.7834	21.946
FBgn0000115	1.90697	0.0567847	33.5824	46.23	57.6307	57.4463
FBgn0000317	3.61438	0.107658	33.5727	3.69095	5.60317	5.32306
FBgn0036274	3.4719	0.103431	33.5672	22.3877	29.6597	35.6856
FBgn0040079	2.7746	0.0827796	33.5179	52.0191	65.828	72.579
FBgn0038235	4.25635	0.127014	33.5108	14.0703	23.186	11.4794
FBgn0262579	10.0092	0.298931	33.4834	67.1354	70.0173	252.696
FBgn0029820	2.90088	0.0867825	33.427	79.8066	108.712	100.378
FBgn0267978	4.098	0.122712	33.3951	53.7956	88.3502	82.8724
FBgn0016641	4.1521	0.124468	33.3588	66.3932	101.849	101.303
FBgn0038842	7.47764	0.224159	33.3587	7.22466	8.97391	21.6835
FBgn0014877	5.50753	0.165199	33.3387	68.6335	130.653	112.713
FBgn0034259	2.11265	0.0633912	33.3272	96.0357	112.816	129.073
FBgn0037615	29.2124	0.877179	33.3027	1.56511	31.814	39.6301
FBgn0029867	3.3485	0.100555	33.3002	50.1785	69.7753	73.9488
FBgn0028484	2.36498	0.0710231	33.2987	44.2124	46.0792	60.5387
FBgn0050338	7.93909	0.238566	33.2784	5.86842	2.69955	9.6112
FBgn0031157	28.2172	0.848604	33.2513	1.54656	0.20339	0.0858039
FBgn0013467	3.75901	0.113055	33.2493	797.543	1222.72	1252.01
FBgn0034497	11.5085	0.346225	33.24	4.47753	5.45614	26.2816
FBgn0039820	33.5541	1.0102	33.2153	1.76519	0.060516	1.57628
FBgn0266464	4.02549	0.121283	33.1908	30.5344	33.7918	52.4136
FBgn0033028	4.38803	0.132547	33.1054	103.702	157.732	171.796
FBgn0030584	3.62386	0.109539	33.0829	114.905	186.171	152.298
FBgn0032780	10.3958	0.314359	33.0698	1.31939	0.40035	2.57955
FBgn0050349	2.00925	0.0608885	32.9988	16.0627	19.0078	20.1424
FBgn0030005	19.2623	0.585292	32.9106	0.870533	2.96348	8.58096
FBgn0052183	3.53108	0.107315	32.9039	86.0407	126.977	129.728
FBgn0033434	1.98529	0.0603433	32.9	101.334	129.372	100.063
FBgn0004419	2.26003	0.0687164	32.8892	137.4	169.271	176.566
FBgn0034243	3.55379	0.108182	32.8501	42.656	53.4583	62.8337
FBgn0035244	3.60591	0.109931	32.8015	87.4515	84.6439	136.459
FBgn0038054	8.20015	0.250257	32.7669	1.52639	2.16762	4.83963
FBgn0034800	17.1993	0.525452	32.7324	1.60001	0.277772	0.322272
FBgn0266848	5.55797	0.170026	32.689	22.232	41.0116	41.2739
FBgn0033480	4.16894	0.127652	32.6587	50.5492	48.2	90.6535
FBgn0038814	33.5005	1.02808	32.5854	0.462091	17.1107	21.1487
FBgn0086370	3.99091	0.122501	32.5786	149.377	184.596	249.013
FBgn0042205	3.54249	0.108775	32.567	6.84602	6.83276	11.3059
FBgn0040534	3.38782	0.104033	32.565	93.6709	107.526	65.2094
FBgn0038072	9.66827	0.297017	32.5513	3.31993	6.84191	11.5227
FBgn0267033	9.53475	0.292942	32.5482	97.6557	22.8816	72.7118
FBgn0023174	4.73438	0.14547	32.5453	89.4804	144.939	71.9312
FBgn0283535	2.66219	0.0819142	32.4997	762.142	793.536	1091.35
FBgn0032258	4.67922	0.144008	32.4928	27.7867	33.3496	51.6641
FBgn0263974	7.576	0.23321	32.4857	0.40476	0.792411	1.03539
FBgn0027504	3.31935	0.102184	32.4839	45.0425	60.8102	74.1641
FBgn0003866	1.58201	0.0488207	32.4045	3.79621	5.19738	3.73455
FBgn0000221	3.66479	0.113203	32.3736	7.70028	11.3647	11.3042
FBgn0003559	4.38581	0.135486	32.371	32.4021	43.3114	56.6372
FBgn0004512	14.8891	0.459957	32.3707	44.9478	21.7345	6.34048
FBgn0028480	3.70257	0.114418	32.3599	247.326	415.37	271.904
FBgn0038829	4.03049	0.124625	32.341	35.7673	50.8262	57.0362
FBgn0250788	3.0611	0.0946612	32.3374	283.675	374.194	393.422
FBgn0033243	11.3466	0.351405	32.2891	2.74309	2.65933	12.6499
FBgn0026239	3.69453	0.114454	32.2796	10.1167	14.569	17.0082
FBgn0036460	3.35487	0.103942	32.2764	19.7225	12.5029	15.5022
FBgn0033951	4.74126	0.146899	32.2757	52.8324	81.8184	92.2907
FBgn0034214	3.46675	0.10745	32.2638	11.7273	13.1273	19.7894
FBgn0039838	41.8556	1.29817	32.242	0	1.66349	0
FBgn0039505	2.82662	0.0876692	32.2418	71.3924	98.7697	88.6911
FBgn0263738	10.2337	0.318467	32.1342	16.2527	45.5701	46.3403
FBgn0003023	9.39442	0.292376	32.1313	0.397138	0.241376	1.27168
FBgn0002899	11.0204	0.343223	32.1087	0.94474	0.444665	2.62726
FBgn0039066	2.65817	0.0828068	32.1009	40.87	56.6353	38.4257
FBgn0039183	3.90024	0.121543	32.0893	7.34661	12.5108	8.87484
FBgn0038901	59.8185	1.86481	32.0775	0	0	13.304
FBgn0034172	4.05501	0.126417	32.0765	27.0644	34.9944	46.1036
FBgn0265084	15.2044	0.474335	32.0542	3.67469	30.5233	25.5295
FBgn0015625	13.5792	0.423787	32.0425	0.766362	0.365798	3.02324
FBgn0030151	4.00188	0.125173	31.9709	76.3084	92.2266	130.609
FBgn0015737	3.7519	0.117414	31.9545	84.7427	146.671	95.6677
FBgn0032598	11.6945	0.366129	31.9409	0.336144	1.70869	0.723921
FBgn0030894	4.38655	0.137461	31.9112	27.1482	39.0404	43.8196
FBgn0025382	7.12499	0.2233	31.9077	71.5965	143.426	146.777
FBgn0031836	1.86087	0.0584131	31.857	124.453	143.583	156.714
FBgn0014179	6.05927	0.190226	31.8529	1.11741	0.613251	1.00502
FBgn0031717	8.15866	0.256325	31.8294	34.8532	24.5809	12.5779
FBgn0041171	2.85023	0.0895613	31.8244	35.0067	48.3429	47.7679
FBgn0005558	4.55581	0.143158	31.8237	56.701	71.5335	34.1735
FBgn0040087	3.65144	0.114813	31.8034	16.6636	17.796	26.8107
FBgn0033378	2.53994	0.080043	31.7322	52.7555	60.5038	77.211
FBgn0029861	2.30266	0.0726726	31.6854	17.5216	19.919	23.3267
FBgn0030091	4.2354	0.133773	31.661	22.2937	32.8447	37.7877
FBgn0263260	5.79569	0.183252	31.6269	21.3885	19.2017	44.4969
FBgn0035981	3.54109	0.11197	31.6254	57.7588	62.3152	91.6353
FBgn0036754	9.38877	0.297253	31.5852	6.32779	20.3372	6.24223
FBgn0039589	12.1778	0.385651	31.5773	14.95	14.2119	64.2709
FBgn0028572	4.51399	0.142975	31.5719	156.19	285.281	235.788
FBgn0264694	3.88462	0.123194	31.5327	54.3046	51.8238	89.4307
FBgn0032387	28.1888	0.894325	31.5197	3.91082	2.18108	0.0681079
FBgn0261933	5.761	0.182777	31.5192	12.8095	21.1886	24.2259
FBgn0037633	4.52243	0.143491	31.5172	16.7999	9.04579	13.868
FBgn0085420	3.05642	0.09711	31.4737	28.2794	34.6709	46.3166
FBgn0035199	22.4939	0.714887	31.4649	1.29583	0.12903	0.0855931
FBgn0028509	2.33194	0.0741443	31.4513	66.9032	70.6795	93.7666
FBgn0035627	12.8261	0.407846	31.4485	0.894379	0.744151	4.29935
FBgn0031883	2.82706	0.0898969	31.4478	274.359	321.038	387.733
FBgn0034734	4.29492	0.136627	31.4354	3.1289	4.3318	5.09192
FBgn0031008	5.04388	0.160497	31.4266	12.0103	17.3872	22.5813
FBgn0266409	5.53577	0.176227	31.4128	70.5457	128.801	137.058
FBgn0031053	30.0631	0.957271	31.405	1.0812	0.221066	0.0350791
FBgn0034307	2.94318	0.0937325	31.3998	9.44359	9.33372	6.17662
FBgn0039132	3.27745	0.10438	31.3992	137.864	184.342	203.068
FBgn0260766	13.4224	0.428495	31.3246	3.1131	2.39313	0.457696
FBgn0039116	2.31956	0.0741074	31.3	58.3128	66.403	82.0038
FBgn0029529	5.59458	0.179117	31.2341	103.449	49.5759	101.547
FBgn0003360	2.33078	0.0746252	31.2332	3036.04	3662.16	4290.79
FBgn0261387	3.9572	0.126717	31.2287	80.6357	76.8478	134
FBgn0028481	4.25931	0.136438	31.218	170.873	238.847	287.878
FBgn0030974	2.70107	0.0866069	31.1877	68.8153	65.8483	45.3973
FBgn0032656	4.22895	0.135672	31.1704	40.3438	52.4837	69.2978
FBgn0027597	3.14266	0.100865	31.1571	27.7039	33.9495	40.5349
FBgn0037920	3.17668	0.102024	31.1365	15.157	22.3931	16.3389
FBgn0039764	8.10989	0.260673	31.1113	15.3567	43.8356	18.836
FBgn0037186	8.97871	0.288955	31.073	16.943	6.16391	5.81945
FBgn0036380	40.5227	1.30518	31.0476	1.14791	0.88184	0
FBgn0052206	9.89428	0.318783	31.0377	47.4972	69.7336	15.0634
FBgn0051156	8.61954	0.278196	30.9836	20.6008	14.7092	6.34278
FBgn0028717	3.21043	0.103654	30.9725	74.0877	52.3695	88.6813
FBgn0036671	4.37187	0.141202	30.9619	18.1262	30.481	28.9734
FBgn0051453	5.97345	0.192964	30.9563	14.2064	7.00952	9.79755
FBgn0036391	4.35641	0.140861	30.9271	77.614	99.6922	137.486
FBgn0027512	3.60972	0.116723	30.9256	44.9767	30.5027	56.1544
FBgn0260655	3.7048	0.119831	30.9169	30.2133	34.7384	49.6617
FBgn0020907	4.13841	0.133869	30.914	433.41	642.082	708.837
FBgn0040011	2.56115	0.0828505	30.9129	64.1712	88.9341	89.5777
FBgn0052237	50.3593	1.62971	30.9008	0	3.14563	0.0303143
FBgn0250904	50.0761	1.62203	30.8724	0	0.0398871	4.56153
FBgn0034389	5.2264	0.169292	30.872	53.8643	103.15	105.396
FBgn0035601	4.91718	0.159315	30.8646	97.7789	181.291	217.788
FBgn0010317	30.1133	0.975704	30.8632	8.33164	3.21215	0.201673
FBgn0030514	2.0819	0.0674838	30.8504	52.9434	66.7149	65.4242
FBgn0039632	3.3665	0.109127	30.8496	21.3851	24.8208	34.3955
FBgn0030701	2.5479	0.0826398	30.8314	84.2388	95.3268	123.922
FBgn0035204	6.96942	0.226322	30.7943	97.1411	220.04	79.9402
FBgn0031772	3.22029	0.10462	30.7809	26.2744	32.4507	41.4358
FBgn0042138	3.95587	0.128684	30.7409	304.013	393.686	504.326
FBgn0031106	4.34784	0.141473	30.7326	53.3366	61.2404	94.4065
FBgn0037844	20.7318	0.674596	30.7322	0.78696	2.16779	15.322
FBgn0029131	4.8859	0.159117	30.7062	16.2095	26.0889	11.785
FBgn0031149	3.03871	0.0989623	30.7057	54.5422	57.8447	83.0747
FBgn0032236	2.53282	0.0825732	30.6736	70.9189	72.4188	100.289
FBgn0039358	3.61271	0.117794	30.6697	295.515	421.621	447.637
FBgn0039631	4.34254	0.141842	30.6153	11.2846	14.2744	20.2105
FBgn0038585	4.87427	0.159668	30.5276	29.1318	47.7059	52.8505
FBgn0034118	3.5236	0.115466	30.5162	29.8644	45.4485	36.9095
FBgn0041205	3.90078	0.127946	30.4877	68.2916	82.7646	121.164
FBgn0028382	4.47609	0.147118	30.4251	33.8228	43.2418	21.2929
FBgn0265726	4.94485	0.162684	30.3954	38.3977	73.4889	52.9949
FBgn0040384	3.05448	0.100526	30.3849	106.834	81.4321	79.9608
FBgn0263112	5.1757	0.170398	30.3742	40.0954	25.5709	20.2971
FBgn0015359	3.6666	0.120724	30.3718	21.621	31.9308	28.611
FBgn0014075	3.69874	0.12205	30.305	27.147	42.5947	36.8947
FBgn0035907	31.8514	1.05129	30.2973	7.32046	14.6056	0.150743
FBgn0023213	7.09096	0.234053	30.2964	103.384	229.945	231.602
FBgn0032812	3.41753	0.112826	30.2904	19.6864	24.5131	31.7351
FBgn0039944	4.83972	0.159809	30.2844	40.7358	87.4292	46.756
FBgn0036640	24.2449	0.800581	30.2842	0.671591	24.7536	0.951645
FBgn0028426	15.2355	0.504091	30.2236	5.35725	11.3447	43.3716
FBgn0022069	3.22262	0.106706	30.2011	24.8574	34.408	38.4131
FBgn0034641	4.29191	0.142196	30.1831	13.9875	20.706	23.9325
FBgn0026873	4.44541	0.147433	30.1522	31.7613	46.7581	22.9078
FBgn0026369	3.89441	0.12918	30.1471	56.9655	85.2887	81.9202
FBgn0038170	9.5605	0.317318	30.129	7.14355	1.70446	3.96442
FBgn0026149	4.14611	0.13765	30.1206	19.802	24.5693	32.785
FBgn0031768	3.08324	0.102404	30.1084	35.7876	47.4361	52.502
FBgn0031640	3.53256	0.11735	30.1029	18.896	24.1241	30.4854
FBgn0032339	3.88968	0.129227	30.0995	14.4436	19.1301	23.4829
FBgn0004132	6.7686	0.224993	30.0836	65.1221	55.1786	151.468
FBgn0031395	3.23276	0.1076	30.0441	38.056	56.0852	50.4952
FBgn0032946	7.9364	0.264163	30.0436	838.078	2533.68	1599.5
FBgn0086679	2.31965	0.0772569	30.0251	61.2729	71.0757	84.0439
FBgn0013435	3.07394	0.102471	29.9981	24.7052	22.6685	38.2464
FBgn0036134	4.24289	0.14153	29.9787	84.3996	117.949	143.368
FBgn0053775	49.2676	1.64397	29.9686	0.495346	18.1849	0
FBgn0042131	34.2379	1.14391	29.9306	0.296944	5.3705	0.0227372
FBgn0014903	12.7947	0.427503	29.929	2.14057	11.1175	7.16474
FBgn0034854	2.22591	0.0745453	29.8598	46.4343	56.1398	63.1429
FBgn0050463	3.31364	0.11106	29.8364	38.1532	54.7557	55.8487
FBgn0031238	5.24967	0.175959	29.8347	16.7389	33.756	29.3963
FBgn0037697	4.27232	0.143234	29.8275	25.1266	30.0067	44.5337
FBgn0283468	3.10315	0.104183	29.7856	73.9698	91.3695	106.331
FBgn0032001	4.56109	0.153143	29.7832	85.5739	67.8465	43.9692
FBgn0039890	4.08999	0.137408	29.7653	229.542	127.294	241.231
FBgn0041723	2.95104	0.0992514	29.733	83.04	109.951	116.065
FBgn0261446	13.4868	0.453806	29.7192	2.39098	5.27315	14.3723
FBgn0037470	2.90246	0.0977077	29.7056	43.6638	41.1316	29.9082
FBgn0028475	2.82677	0.0951717	29.7018	34.0484	39.4317	50.3169
FBgn0032473	28.6801	0.966819	29.6644	2.35541	0.0819004	0.238075
FBgn0033557	4.84897	0.163525	29.6527	9.57077	15.6341	17.4504
FBgn0038080	4.31202	0.145668	29.6016	43.578	55.8441	26.3813
FBgn0051814	3.58571	0.121174	29.5915	50.3224	69.8731	70.9051
FBgn0036354	15.0191	0.508327	29.5461	0.886591	0.721532	5.57379
FBgn0261014	2.08496	0.0705706	29.5443	113.693	135.552	145.224
FBgn0034642	14.7308	0.498831	29.5306	1.14834	5.16343	5.54824
FBgn0000370	3.57798	0.121203	29.5206	476.752	766.348	527.45
FBgn0027570	3.76655	0.127955	29.4366	28.0939	27.5337	43.6792
FBgn0037911	6.2823	0.213534	29.4207	16.9255	17.764	36.6958
FBgn0031384	3.03839	0.103359	29.3964	107.141	150.911	143.365
FBgn0011740	2.63334	0.0895935	29.3921	28.9351	41.8912	35.2962
FBgn0035083	4.44787	0.151387	29.3808	181.27	308.916	216.979
FBgn0010240	2.95327	0.100528	29.3775	174.103	230.715	247.951
FBgn0039773	3.40693	0.116026	29.3635	26.0252	34.8355	38.8093
FBgn0050008	6.19903	0.211338	29.3323	1.18678	2.3069	3.27517
FBgn0004636	2.96237	0.101066	29.3112	111.317	156.536	139.666
FBgn0034092	43.8049	1.4954	29.2931	0	0.789668	1.04262
FBgn0039617	2.48664	0.0849099	29.2856	77.4932	105.672	93.4926
FBgn0036273	2.25646	0.0770528	29.2846	35.6869	44.2929	47.2561
FBgn0261610	2.32766	0.0795359	29.2656	31.427	36.212	43.1159
FBgn0025391	4.95124	0.169268	29.2509	36.6334	59.307	61.867
FBgn0000533	21.3736	0.731204	29.2307	4.92702	0.584114	0.404548
FBgn0086694	2.62495	0.0898362	29.2192	47.3296	54.8625	67.0251
FBgn0030912	8.49048	0.29145	29.1319	7.48507	2.73807	3.02252
FBgn0033783	1.53136	0.0525685	29.1309	49.9444	60.0994	55.5416
FBgn0030607	18.7921	0.645125	29.1294	1.10005	5.22405	15.6191
FBgn0028579	4.74715	0.163017	29.1206	76.4274	95.9961	143.196
FBgn0037422	50.4343	1.73307	29.1012	0	0.248763	2.014
FBgn0051272	24.6079	0.845898	29.0909	0.560919	14.8251	6.06762
FBgn0029835	20.427	0.702716	29.0687	0.233904	1.43794	0.0656416
FBgn0010415	5.24362	0.180452	29.0583	323.156	433.427	692.935
FBgn0031782	2.92127	0.10057	29.0472	13.907	16.2878	10.0079
FBgn0267363	71.1185	2.44907	29.039	0	56.8088	0
FBgn0035715	2.57837	0.0888396	29.0228	75.8144	81.3261	108.688
FBgn0034511	18.5179	0.638089	29.0209	1.65354	1.61032	0.249543
FBgn0035059	2.71029	0.0934091	29.0153	38.525	38.2246	53.6775
FBgn0038592	4.93742	0.170196	29.0101	3.71306	4.56097	7.16062
FBgn0032516	3.28275	0.113532	28.9147	34.3335	51.2847	32.1602
FBgn0029887	4.60731	0.159405	28.9032	76.5352	104.995	151.44
FBgn0035501	13.1895	0.456975	28.8625	1.6527	3.5492	10.1026
FBgn0026084	4.97389	0.172597	28.8179	126.093	79.5484	66.0381
FBgn0004055	4.41326	0.153184	28.8102	273.588	338.396	498.042
FBgn0263986	21.8783	0.759441	28.8084	0.0521694	1.29877	0.130876
FBgn0034230	3.33492	0.115818	28.7944	85.1251	118.962	129.681
FBgn0032900	24.5299	0.852231	28.7832	7.51144	169.931	18.2449
FBgn0262808	19.6743	0.684341	28.7492	4.22985	0.443653	0.745092
FBgn0050394	2.97917	0.103698	28.7293	17.5921	23.5718	14.2833
FBgn0038772	3.8982	0.135713	28.7239	4.11967	5.86194	6.80578
FBgn0031483	6.02236	0.209795	28.706	47.7289	52.4782	23.6385
FBgn0013725	3.18075	0.110823	28.7012	100.283	125.097	148.24
FBgn0033224	2.55094	0.0888915	28.6972	58.4731	79.7785	74.5057
FBgn0029801	3.28682	0.114549	28.6936	84.8423	81.967	124.946
FBgn0033853	3.30012	0.115168	28.6547	37.3696	52.5554	53.486
FBgn0026199	3.38683	0.11836	28.6147	60.8974	57.8301	39.2601
FBgn0034498	2.40568	0.0841834	28.5766	11.5195	15.1424	15.7317
FBgn0030897	4.68036	0.16392	28.5527	261.032	431.017	458.853
FBgn0029819	1.94114	0.068183	28.4696	80.0011	95.8438	67.763
FBgn0035838	5.36646	0.188607	28.4532	2.57155	4.43857	4.67301
FBgn0035333	2.76684	0.0972519	28.4503	176.454	154.504	235.865
FBgn0032295	4.24724	0.149327	28.4426	39.3723	57.8728	65.648
FBgn0039213	2.6149	0.0920057	28.4211	55.676	72.6728	75.2957
FBgn0033929	3.66233	0.129007	28.3886	24.5162	40.8292	30.4477
FBgn0004597	4.57045	0.161124	28.3661	27.4898	43.2616	45.1304
FBgn0034530	15.965	0.563107	28.3516	1.01004	3.72053	0.238641
FBgn0039780	14.7159	0.519468	28.3288	2.03658	2.55733	0.310441
FBgn0003308	9.18751	0.32495	28.2736	11.4444	3.54183	4.81309
FBgn0039016	4.68674	0.165847	28.2594	4.88478	8.86746	7.24086
FBgn0035023	4.09924	0.145091	28.2529	242.559	358.441	380.881
FBgn0037315	3.06815	0.108753	28.2121	64.5167	41.0829	56.2961
FBgn0033206	1.73363	0.0615057	28.1865	35.7382	39.2113	45.5577
FBgn0063649	5.63791	0.200113	28.1737	33.7496	61.9502	62.6338
FBgn0038586	6.05456	0.215064	28.1523	18.6558	18.047	41.6163
FBgn0030296	13.4738	0.479703	28.0879	0.98507	0.475049	4.52302
FBgn0015477	3.32488	0.11838	28.0865	23.8552	26.702	36.8514
FBgn0053096	3.42576	0.121978	28.0851	18.2085	11.392	21.857
FBgn0028837	3.92843	0.139898	28.0806	36.1476	42.7129	62.6769
FBgn0010395	14.0369	0.499995	28.074	0.412954	0.710145	2.70608
FBgn0259243	6.12259	0.218348	28.0405	155.207	224.691	356.097
FBgn0031801	22.6166	0.807528	28.0072	7.23021	15.1573	149.297
FBgn0039044	5.98029	0.213553	28.0038	12.4445	6.67993	17.2464
FBgn0030030	2.98102	0.106526	27.9839	82.2026	114.438	72.1367
FBgn0087039	3.71611	0.132843	27.9736	30.6845	26.7043	17.8169
FBgn0260798	3.34994	0.119953	27.9272	150.792	169.015	251.304
FBgn0002283	3.73005	0.133571	27.9256	47.6673	71.2077	63.6796
FBgn0036038	4.15024	0.148662	27.9173	5.43488	7.30254	9.62597
FBgn0035400	2.51147	0.0900931	27.8764	180.91	260.102	171.838
FBgn0032813	4.58546	0.164526	27.8708	21.4668	19.9503	38.2238
FBgn0031092	7.566	0.271535	27.8638	28.1992	14.4244	10.6263
FBgn0038787	3.52577	0.126683	27.8313	28.9135	37.9695	45.362
FBgn0044051	7.98964	0.287203	27.8188	6.82204	21.5882	6.85143
FBgn0033574	12.9877	0.467286	27.794	0.438398	2.77226	1.22629
FBgn0040763	18.1515	0.653089	27.7933	6.59398	1.78372	0.663071
FBgn0259174	4.11576	0.14821	27.7698	94.9239	140.461	146.161
FBgn0028974	6.54147	0.235717	27.7513	5.31647	2.87672	11.2105
FBgn0038140	6.10847	0.220135	27.7487	8.10661	13.0799	15.868
FBgn0041713	13.5581	0.489229	27.7131	3.09908	15.7381	5.44242
FBgn0004507	2.99764	0.108203	27.7038	248.469	281.098	374.397
FBgn0039273	4.12065	0.14886	27.6814	10.9793	11.5713	19.1801
FBgn0267408	12.6943	0.458765	27.6706	16.4636	12.4197	3.11332
FBgn0030003	1.7671	0.0638649	27.6693	18.4072	24.6423	21.2421
FBgn0033814	2.44156	0.0882565	27.6644	63.783	78.3375	82.1582
FBgn0037250	3.3187	0.119996	27.6568	24.8213	26.1835	39.0793
FBgn0038855	3.43892	0.124363	27.6523	23.5467	27.2688	36.5678
FBgn0040366	3.88938	0.140708	27.6415	7.59504	9.63683	13.1926
FBgn0033985	15.3449	0.555157	27.6406	26.9504	114.722	173.105
FBgn0000384	5.95697	0.215649	27.6235	46.1339	71.0353	99.1157
FBgn0037317	2.31753	0.0838992	27.6228	35.2669	43.3089	44.6253
FBgn0051525	10.0097	0.362478	27.6147	0.331251	0.179624	1.30184
FBgn0025519	3.01464	0.10939	27.5588	28.6876	42.8259	34.7036
FBgn0032059	1.82572	0.0663783	27.5048	80.4119	80.2078	104.624
FBgn0010380	2.47301	0.0900125	27.474	182.332	231.219	241.269
FBgn0037922	3.05449	0.111229	27.4614	21.9866	30.6021	30.6794
FBgn0034931	7.19914	0.262286	27.4477	1.54826	1.4349	4.33847
FBgn0037712	14.6871	0.535212	27.4417	15.6347	12.274	2.23113
FBgn0026787	2.6297	0.0959671	27.402	35.6032	44.7126	28.8466
FBgn0030777	14.9471	0.54553	27.3991	1.80247	12.8072	1.4732
FBgn0019650	4.48097	0.164107	27.3051	122.597	168.53	241.345
FBgn0035210	18.653	0.683795	27.2787	3.68668	1.43079	0.453319
FBgn0036340	2.83922	0.104124	27.2677	53.675	74.8593	73.1501
FBgn0028671	3.28547	0.120524	27.2598	388.296	526.257	572.188
FBgn0261647	4.55168	0.167062	27.2454	28.9075	40.9527	49.2523
FBgn0031077	3.46992	0.127362	27.2445	8.1822	5.50256	5.57887
FBgn0031961	3.78785	0.139047	27.2415	1.22436	0.622989	0.961025
FBgn0031042	32.6469	1.19867	27.2359	0.345384	0.0194443	2.38251
FBgn0034761	26.9038	0.988278	27.2229	16.3755	62.5483	436.04
FBgn0025641	2.59978	0.0955201	27.2171	69.054	97.3734	73.3796
FBgn0037843	4.1813	0.153681	27.2076	55.3931	75.92	95.8206
FBgn0002780	2.30308	0.084649	27.2074	75.3432	73.3795	100.386
FBgn0026015	4.48052	0.164832	27.1824	23.837	30.6896	42.7812
FBgn0030345	2.4272	0.0894763	27.1268	44.7074	61.6067	57.6574
FBgn0005672	4.65956	0.171883	27.1089	228.066	392.553	335.534
FBgn0000629	3.40572	0.125741	27.0851	26.6871	41.1189	32.2265
FBgn0022786	2.58033	0.0953863	27.0514	8.50426	6.95296	10.7104
FBgn0035358	31.7717	1.17634	27.0089	0.592545	3.9266	0.0982041
FBgn0015527	3.42001	0.12664	27.0058	22.2713	29.5889	34.125
FBgn0030734	1.79903	0.0666186	27.005	94.8809	111.899	117.533
FBgn0000576	3.60496	0.13355	26.9934	0.803204	1.31333	1.11883
FBgn0015795	3.10261	0.114977	26.9847	232.124	295.412	321.93
FBgn0037472	1.97481	0.0733955	26.9064	140.784	115.816	168.051
FBgn0039808	5.07873	0.18877	26.9044	85.2428	148.271	145.942
FBgn0034643	2.03109	0.0755152	26.8964	47.6458	57.0808	60.3115
FBgn0027841	3.68667	0.137116	26.8871	11.7269	14.2245	19.1656
FBgn0004133	5.87448	0.218533	26.8814	18.3706	12.746	8.30945
FBgn0050296	3.8806	0.14437	26.8797	148.254	217.037	232.936
FBgn0039056	3.56095	0.132539	26.8672	39.8987	54.7234	60.4654
FBgn0023081	3.27292	0.121845	26.8615	45.1229	55.3632	69.8645
FBgn0085212	4.63682	0.172775	26.8373	21.0644	20.9689	11.0599
FBgn0032870	2.68814	0.100168	26.8364	31.7299	22.5221	32.132
FBgn0038862	1.31641	0.0490845	26.8193	30.9013	37.3533	35.6577
FBgn0004431	27.5328	1.0293	26.7489	0.603484	2.61568	0.0428718
FBgn0030770	25.6228	0.957926	26.7482	0.538243	1.18822	0.0331077
FBgn0250843	3.14697	0.117815	26.7111	49.7151	61.6363	77.1431
FBgn0035889	5.69618	0.213291	26.7062	19.5975	19.2178	40.8418
FBgn0264959	2.85874	0.107058	26.7028	109.105	156.379	128.977
FBgn0032671	3.35829	0.125786	26.6984	8.66901	6.67825	12.144
FBgn0025578	52.7792	1.97726	26.6932	0	0	8.16787
FBgn0038542	5.84586	0.219189	26.6704	16.779	25.9114	34.4495
FBgn0086371	5.38966	0.202099	26.6684	49.9561	43.8762	93.6011
FBgn0262900	43.4027	1.62755	26.6676	0	6.41962	0.0846466
FBgn0028645	2.52954	0.0948682	26.6638	82.6992	114.364	104.701
FBgn0037902	3.81325	0.143158	26.6366	113.812	180.958	169.544
FBgn0260639	5.1831	0.194586	26.6365	45.0662	88.9443	51.4731
FBgn0033884	1.94172	0.0729754	26.6078	105.545	119.224	139.656
FBgn0260237	45.6425	1.71747	26.5754	57.5957	0.0987587	0.348192
FBgn0027535	5.30951	0.200106	26.5335	14.8073	19.5249	28.957
FBgn0003892	9.68664	0.365367	26.5121	0.562833	0.68467	1.93121
FBgn0261573	3.57318	0.134825	26.5024	48.7164	76.1144	66.3044
FBgn0024273	3.74976	0.141539	26.4927	53.3148	83.722	86.0657
FBgn0028646	2.47503	0.0934536	26.484	71.1455	77.613	99.3755
FBgn0030966	8.07779	0.305367	26.4527	13.9773	8.73766	4.85016
FBgn0035689	6.71217	0.253976	26.4284	4.61467	11.0671	4.03004
FBgn0010548	3.57925	0.135475	26.4201	71.3903	99.0038	115.191
FBgn0033095	6.40315	0.242566	26.3975	16.5213	42.9272	53.2777
FBgn0026374	13.1791	0.499426	26.3885	39.5088	7.59708	14.1282
FBgn0037368	2.8696	0.108762	26.3842	11.2961	8.17387	7.54966
FBgn0025802	3.24444	0.123054	26.3659	31.0572	39.957	47.5759
FBgn0027453	2.88495	0.109618	26.3182	32.412	46.3537	41.4575
FBgn0015299	9.68347	0.368184	26.3006	84.6011	60.7722	23.4473
FBgn0028664	4.07563	0.155001	26.2942	18.2825	12.1926	9.75313
FBgn0037364	12.9545	0.492825	26.2862	1.40785	0.91437	7.44717
FBgn0036688	14.5185	0.552639	26.2711	2.21279	0.422619	0.741426
FBgn0034114	11.236	0.427872	26.2601	11.0043	49.1581	17.3352
FBgn0035082	4.62196	0.176099	26.2464	37.3122	28.5451	59.3774
FBgn0037949	3.02339	0.115222	26.2397	112.966	128.618	167.001
FBgn0032488	2.8723	0.109503	26.2302	38.6596	43.604	57.2088
FBgn0025678	4.46281	0.170232	26.2161	49.811	67.3695	95.85
FBgn0017561	6.79098	0.259319	26.1877	30.0407	29.2062	69.0802
FBgn0035484	7.98935	0.305157	26.1811	20.1089	13.5247	48.9519
FBgn0035270	4.23352	0.161759	26.1718	45.7062	61.5166	76.5027
FBgn0261985	3.46952	0.13266	26.1535	66.5615	104.166	86.0595
FBgn0261059	53.5583	2.05055	26.119	3.04036	0.288012	0
FBgn0015754	2.71518	0.104001	26.1072	376.734	484.393	496.095
FBgn0040207	3.5908	0.137627	26.0908	22.7992	35.1863	33.3431
FBgn0035405	2.21811	0.0850411	26.0827	26.9604	28.4459	35.4808
FBgn0000447	5.54837	0.213001	26.0485	33.319	16.369	33.7341
FBgn0051697	9.62388	0.369506	26.0453	1.14613	2.30027	4.07839
FBgn0029720	4.78953	0.184084	26.0181	285.114	482.185	452.384
FBgn0034009	3.19267	0.122722	26.0153	35.7556	54.1811	43.3115
FBgn0036356	6.5659	0.25258	25.9953	8.60209	20.3931	8.44861
FBgn0039559	2.93787	0.113043	25.989	11.4581	17.7325	13.8274
FBgn0031174	3.39615	0.130728	25.9789	40.101	58.1365	58.5831
FBgn0033273	2.72117	0.104782	25.97	65.9288	96.3556	69.0645
FBgn0026196	4.48289	0.172663	25.9632	12.2805	13.6943	23.0598
FBgn0032193	3.85279	0.14861	25.9256	25.7665	39.4186	39.8518
FBgn0035158	17.236	0.665377	25.9041	18.2188	2.86716	3.95105
FBgn0038763	1.64332	0.0634865	25.8845	49.8052	61.8178	54.3663
FBgn0035975	9.04238	0.349666	25.86	24.9337	22.2906	8.16635
FBgn0030931	19.8744	0.768726	25.8537	0.280631	0.428653	3.92533
FBgn0025571	4.23895	0.164009	25.8459	129.453	197.22	205.531
FBgn0033065	45.8986	1.77621	25.8407	91.3542	144.738	0.296941
FBgn0038742	5.95743	0.230901	25.8008	24.6393	27.5855	54.4906
FBgn0086362	3.1215	0.120987	25.8004	28.1697	40.7658	35.7776
FBgn0010909	4.78381	0.185492	25.7898	62.4925	106.287	87.634
FBgn0039858	4.17687	0.161971	25.7878	404.614	334.536	659.527
FBgn0035146	3.69962	0.143676	25.7498	38.3346	59.1483	47.8149
FBgn0032197	3.43838	0.133712	25.7148	39.3814	53.4004	66.28
FBgn0259991	26.981	1.04975	25.7023	1.64176	0.136253	17.4102
FBgn0030788	3.96798	0.154473	25.6871	34.1366	43.5766	53.9695
FBgn0027567	3.53184	0.137612	25.6652	241.711	327.4	373.148
FBgn0035318	3.42156	0.133417	25.6456	41.5709	62.1409	54.8669
FBgn0032006	9.56825	0.373217	25.6372	11.044	26.5578	32.7038
FBgn0038519	5.06685	0.197647	25.6358	91.157	132.622	189.143
FBgn0019932	2.68928	0.104906	25.6352	44.6448	46.7381	67.7412
FBgn0036423	12.4436	0.48554	25.6284	1.96797	11.074	4.1418
FBgn0038548	5.05659	0.197331	25.6248	19.8787	11.0505	11.2883
FBgn0035581	31.671	1.24015	25.538	0.138785	9.93562	0.770468
FBgn0032402	6.34776	0.249139	25.4787	272.313	294.21	125.629
FBgn0033893	32.1317	1.26268	25.4472	1.0688	0.406712	0.0355561
FBgn0033486	3.51295	0.138241	25.4118	49.6142	57.8406	78.8275
FBgn0052816	15.092	0.593908	25.4114	1.07212	3.70236	0.254355
FBgn0050428	8.09793	0.318704	25.409	39.3498	46.0574	105.003
FBgn0030610	4.65212	0.183183	25.3961	218.238	185.39	390.248
FBgn0027503	3.93095	0.154887	25.3796	20.7271	26.8023	34.0791
FBgn0260451	33.4079	1.31638	25.3787	132.356	1.16271	1.21771
FBgn0054045	23.684	0.933909	25.3601	1.08991	0.296698	0.122197
FBgn0004580	4.42013	0.174299	25.3594	655.923	930.327	1133.39
FBgn0032409	2.04951	0.0808255	25.3572	28.1946	33.404	36.1252
FBgn0032850	10.4863	0.413681	25.3488	3.50991	3.38693	15.0944
FBgn0029664	4.05115	0.159836	25.3456	43.474	40.9969	74.7953
FBgn0038334	27.1128	1.07003	25.3383	2.3872	0.144254	0.169092
FBgn0041180	7.91837	0.31256	25.3339	3.14206	7.6438	12.0027
FBgn0026620	4.01575	0.158546	25.3287	105.137	186.267	114.162
FBgn0083985	1.18173	0.0466678	25.3221	6.83265	8.66804	8.04411
FBgn0029157	4.13849	0.163547	25.3046	24.6908	40.4661	42.7535
FBgn0030178	7.53896	0.29795	25.3028	7.53609	18.5587	16.8821
FBgn0015615	1.89295	0.0748267	25.2978	36.3511	45.4649	32.785
FBgn0038926	4.90348	0.194023	25.2726	80.1438	67.183	141.362
FBgn0029849	3.59222	0.142186	25.2643	54.8112	33.3966	39.2232
FBgn0264339	4.38834	0.173758	25.2554	42.9065	74.6379	61.3863
FBgn0030361	2.23545	0.0885666	25.2404	68.211	80.952	89.6761
FBgn0003655	63.953	2.5343	25.235	0.0257468	14.0904	16.3126
FBgn0030369	19.2411	0.762593	25.2312	0.063446	0.11696	1.08231
FBgn0037342	2.26845	0.0899482	25.2195	41.9223	50.902	56.622
FBgn0028341	4.93161	0.195728	25.1962	106.262	53.9156	126.851
FBgn0011770	3.84873	0.152911	25.1697	21.6716	38.6744	32.6239
FBgn0020653	2.75481	0.109735	25.1041	179.613	251.842	188.906
FBgn0051643	2.32106	0.0924787	25.0984	6.8036	7.94629	9.17275
FBgn0014127	4.48616	0.179169	25.0387	6.84911	13.1574	6.36908
FBgn0030512	2.59111	0.103722	24.9814	22.7707	27.0239	32.0226
FBgn0085257	5.01336	0.200728	24.9759	48.2564	28.1738	67.1409
FBgn0285892	4.3124	0.1727	24.9705	12.5042	14.9725	23.8065
FBgn0031986	4.44053	0.177979	24.9497	7.52869	4.64329	3.92566
FBgn0039459	3.31474	0.132859	24.9493	5.49233	4.71151	8.73661
FBgn0004401	8.41741	0.337433	24.9454	135.384	315.564	481.668
FBgn0029656	11.6473	0.467103	24.9353	1.702	0.585777	0.389661
FBgn0034198	12.318	0.494322	24.9191	4.45542	6.37782	34.9277
FBgn0261258	7.53868	0.302631	24.9105	117.547	166.461	50.0035
FBgn0038321	7.74392	0.310985	24.9013	237.06	122.487	96.6748
FBgn0030057	6.99538	0.281043	24.8908	11.9659	30.7943	16.4513
FBgn0035010	2.93459	0.117919	24.8864	34.979	52.5571	38.5931
FBgn0004864	4.55614	0.183177	24.8729	17.0545	25.4561	28.8319
FBgn0037619	3.49846	0.14083	24.8417	10.4734	13.6381	17.1196
FBgn0030858	2.3372	0.0941069	24.8356	10.2274	10.8294	14.3438
FBgn0263106	2.052	0.0826942	24.8143	253.063	375.285	271.686
FBgn0046301	2.55795	0.103135	24.8019	44.2772	30.2637	42.1336
FBgn0027508	3.45203	0.139277	24.7853	37.7957	49.3716	57.3315
FBgn0039938	5.86075	0.236657	24.7647	77.7119	65.0082	162.484
FBgn0029718	3.94014	0.159191	24.751	93.6949	60.1778	62.3991
FBgn0267385	1.81419	0.0733104	24.7467	1194.75	1241.66	1569.63
FBgn0032398	1.96565	0.0795194	24.7191	96.5322	90.2689	72.6951
FBgn0037094	2.00948	0.0813243	24.7095	72.707	77.2165	94.7206
FBgn0027497	4.20182	0.17049	24.6455	41.8949	60.9416	70.9529
FBgn0012058	2.80578	0.113882	24.6377	34.3259	41.3193	50.5899
FBgn0027518	6.3451	0.257682	24.6238	12.6781	12.7916	28.672
FBgn0033963	46.4491	1.88706	24.6146	1.47736	0.11339	128.368
FBgn0030797	15.8748	0.645108	24.608	0.968452	4.25411	4.32221
FBgn0040212	4.7763	0.194143	24.602	25.9537	36.4184	50.4283
FBgn0028398	3.54425	0.144087	24.598	63.6081	101.447	52.0078
FBgn0014388	4.41707	0.179858	24.5586	78.4536	118.364	137.862
FBgn0086451	4.32604	0.176277	24.5411	3.29087	4.35939	5.9395
FBgn0030949	6.32252	0.258015	24.5045	1.70964	3.54749	1.42363
FBgn0052087	59.2889	2.41975	24.5021	0.0320404	35.1837	0.0786154
FBgn0031476	7.77843	0.3178	24.4759	1.67499	0.992711	3.78867
FBgn0031359	4.3798	0.178982	24.4706	70.3995	91.472	125.262
FBgn0038871	5.81972	0.238016	24.451	18.7517	29.6913	41.8185
FBgn0003134	3.13396	0.128428	24.4025	181.193	186.007	280.168
FBgn0004177	2.21769	0.0909029	24.3962	372.779	481.598	473.424
FBgn0259717	4.80282	0.196895	24.3927	87.0296	44.9319	65.6651
FBgn0034299	4.84382	0.198591	24.3909	5.98126	11.1737	9.03482
FBgn0023526	2.6289	0.107795	24.3879	74.1181	49.5539	67.5075
FBgn0010770	2.65832	0.109003	24.3876	11.2305	13.5263	16.2667
FBgn0038546	3.81464	0.156421	24.387	68.6467	84.3436	112.529
FBgn0050421	2.16415	0.0887908	24.3736	58.9629	74.8837	75.7693
FBgn0011566	3.60134	0.147792	24.3676	20.8838	31.8742	30.3731
FBgn0037662	10.5919	0.434676	24.3674	1.10755	0.308258	0.388467
FBgn0034418	2.23011	0.091532	24.3643	36.6079	48.5583	44.5092
FBgn0030266	3.64953	0.149986	24.3324	31.8607	46.7811	49.9079
FBgn0020261	3.87388	0.159431	24.2982	22.7221	34.9511	35.6865
FBgn0030341	3.53845	0.145801	24.2691	87.0898	126.613	131.008
FBgn0026411	2.55619	0.105471	24.2359	64.4626	50.7345	78.7775
FBgn0033265	2.01198	0.0831245	24.2044	13.5054	13.9794	10.4781
FBgn0037882	2.37526	0.0983145	24.1598	17.7738	16.1853	24.6793
FBgn0259821	6.6483	0.275209	24.1572	66.9013	75.4966	181.429
FBgn0261279	2.37504	0.098383	24.1407	71.0176	90.1673	96.8218
FBgn0029922	6.61583	0.274105	24.1361	32.7022	48.367	79.4493
FBgn0025692	23.6434	0.979965	24.1268	0.816281	15.1492	8.56588
FBgn0036272	2.28769	0.0948575	24.1171	124.625	123.056	164.532
FBgn0029999	3.53545	0.146632	24.1111	6.6482	10.4335	8.72984
FBgn0261444	5.92922	0.245918	24.1106	34.213	67.1259	72.8645
FBgn0026085	6.25509	0.260047	24.0537	0.59507	0.749174	1.81155
FBgn0023511	5.15506	0.214376	24.0468	14.668	25.7876	11.0333
FBgn0031310	3.64008	0.151385	24.0452	37.6176	53.9761	60.9599
FBgn0250785	4.49348	0.187055	24.0223	61.5851	82.1335	109.099
FBgn0261261	2.26134	0.0941544	24.0173	106.832	144.1	138.578
FBgn0002183	2.70254	0.112541	24.0139	25.0333	35.3787	29.4507
FBgn0034086	17.3765	0.725035	23.9665	15.2391	147.357	18.2072
FBgn0028421	3.44265	0.143729	23.9523	75.8333	94.2299	117.747
FBgn0035239	27.4792	1.14767	23.9434	0.108343	4.23187	2.72892
FBgn0262601	3.30013	0.137892	23.9326	50.0177	80.0146	65.6605
FBgn0035409	43.3615	1.81197	23.9306	0.299328	0	3.57564
FBgn0260935	1.07476	0.0449215	23.9253	25.8907	29.3458	30.4373
FBgn0004050	1.71499	0.0717591	23.8993	50.0505	56.9418	41.4742
FBgn0032883	5.07793	0.212528	23.893	13.0334	19.2103	24.1107
FBgn0033465	1.77517	0.0742976	23.8926	22.2294	26.3256	28.7558
FBgn0029768	9.09821	0.381077	23.875	69.725	62.283	211.148
FBgn0016794	2.53008	0.106004	23.8678	23.3047	29.1127	30.3053
FBgn0033775	15.4114	0.64571	23.8674	16.1289	2.22786	13.0393
FBgn0000633	4.40779	0.184819	23.8492	52.5216	85.0531	82.8467
FBgn0030520	2.41753	0.101724	23.7657	194.519	269.48	200.312
FBgn0284220	3.07162	0.129394	23.7386	35.2189	37.5519	54.5835
FBgn0036299	5.6215	0.236939	23.7255	15.7356	20.57	33.7973
FBgn0016032	4.62147	0.194808	23.7232	13.2792	13.1849	7.10101
FBgn0040066	3.30109	0.139259	23.7047	27.1417	24.9784	41.362
FBgn0032901	5.08356	0.214509	23.6986	174.804	264.779	319.31
FBgn0033990	5.61258	0.23691	23.6907	17.9622	17.8647	8.5431
FBgn0030700	8.84598	0.373517	23.6829	1.69791	4.71786	4.23087
FBgn0250755	4.06652	0.171707	23.6828	15.7122	16.2671	28.8274
FBgn0015279	2.44191	0.103122	23.6797	30.296	40.0495	42.2599
FBgn0039776	3.25702	0.137599	23.6704	65.539	94.1695	56.5904
FBgn0044047	11.8613	0.502303	23.6137	18.719	5.83907	4.32692
FBgn0003460	5.22937	0.221505	23.6083	2.29376	2.54987	1.16378
FBgn0032704	1.89926	0.080467	23.603	126.085	168.392	158.884
FBgn0051176	6.46094	0.2739	23.5887	1.14947	0.667014	0.491339
FBgn0030109	3.26726	0.138627	23.5687	51.1341	38.9379	66.6181
FBgn0086758	11.3603	0.482351	23.5519	64.5128	14.2721	27.7972
FBgn0033784	2.67308	0.113603	23.5299	27.4363	33.941	38.7183
FBgn0028541	1.94657	0.0827436	23.5253	68.1244	85.9399	80.2177
FBgn0028707	10.183	0.432893	23.523	4.23726	7.77412	14.2521
FBgn0040388	10.886	0.462787	23.5226	0.760686	2.30336	3.29488
FBgn0034518	3.55261	0.151104	23.511	87.334	64.2201	57.3961
FBgn0023175	3.53442	0.150403	23.4998	86.4498	94.0779	143.583
FBgn0052179	5.41943	0.230663	23.495	21.0808	23.6195	42.0161
FBgn0032149	5.90314	0.251364	23.4845	16.6299	13.3116	32.162
FBgn0004359	3.46622	0.147644	23.4769	10.7301	13.4918	15.9234
FBgn0027111	2.7272	0.116166	23.4768	1196.77	1296.39	1766.61
FBgn0039407	6.20733	0.264434	23.474	1.93417	4.23381	3.43998
FBgn0030013	3.85695	0.164368	23.4653	28.788	49.1508	24.4774
FBgn0050077	3.84061	0.163726	23.4576	49.4609	32.08	34.6635
FBgn0263233	32.475	1.38598	23.4312	0	1.3037	0
FBgn0010501	2.21431	0.0945527	23.4188	15.5137	21.8848	17.6669
FBgn0085442	3.25634	0.139121	23.4065	112.656	131.454	191.972
FBgn0031659	1.44908	0.0619949	23.3742	46.7938	37.4164	39.5445
FBgn0034501	4.45896	0.190865	23.3618	295.546	400.451	519.054
FBgn0038872	3.6217	0.155197	23.3361	50.6921	70.8339	80.4695
FBgn0039593	13.6582	0.586162	23.301	0.229626	1.8414	1.25564
FBgn0030707	7.44635	0.319652	23.2952	43.0549	42.2255	115.645
FBgn0017567	2.83828	0.121849	23.2933	493.831	518.192	745.207
FBgn0010355	4.21231	0.18084	23.293	27.4632	39.4469	45.3261
FBgn0025625	3.70416	0.159136	23.2767	42.7636	59.4192	67.7901
FBgn0039167	9.64088	0.414579	23.2546	1.45297	0.369764	0.745763
FBgn0086778	6.33387	0.272389	23.253	192.975	346.168	421.997
FBgn0011289	2.41371	0.103816	23.2499	64.2987	87.2172	62.2407
FBgn0262527	2.75178	0.118405	23.2404	74.8731	97.2261	107.786
FBgn0085384	4.08116	0.17565	23.2346	81.6818	104.536	147.541
FBgn0050052	15.5989	0.671775	23.2204	3.18997	20.6498	25.8731
FBgn0038816	5.83528	0.251317	23.2188	31.8533	38.6967	68.7955
FBgn0053137	42.0492	1.81203	23.2055	1.38238	4.54791	0
FBgn0261353	56.2701	2.42635	23.1912	0.0112036	5.27915	149.864
FBgn0035171	3.7205	0.160524	23.1772	124.56	166.662	203.788
FBgn0051812	8.59922	0.371494	23.1477	8.27114	10.8922	26.3888
FBgn0034755	6.99493	0.302291	23.1397	5.83236	3.41857	2.09239
FBgn0016701	1.7144	0.0741662	23.1156	177.173	151.25	209.099
FBgn0011661	2.61255	0.113087	23.1022	161.752	111.742	174.261
FBgn0039712	2.35821	0.102109	23.095	55.1336	66.4988	43.8313
FBgn0032876	2.11721	0.0916923	23.0903	84.5212	98.3417	115.955
FBgn0000229	2.67625	0.115904	23.0903	272.813	330.562	395.768
FBgn0037993	4.15383	0.179909	23.0885	39.2132	48.312	71.0011
FBgn0039736	6.03085	0.261214	23.0878	0.867869	1.81936	0.619055
FBgn0030301	3.49311	0.151323	23.0838	20.4701	26.4148	33.0426
FBgn0031314	3.82018	0.165512	23.0809	9.03384	8.67742	14.1509
FBgn0261792	2.34066	0.101434	23.0757	29.6894	36.3358	43.1669
FBgn0260755	2.52496	0.109427	23.0744	14.2865	11.2105	17.5851
FBgn0033698	2.08683	0.0904488	23.072	15.7276	19.5527	21.914
FBgn0024754	2.33795	0.101342	23.0699	146.225	185.727	204.3
FBgn0052638	5.35296	0.232136	23.0596	34.0276	53.7969	68.2703
FBgn0041775	4.28411	0.185861	23.05	98.5924	152.964	140.993
FBgn0014269	1.57198	0.0682232	23.0418	44.5729	51.1329	54.6121
FBgn0037199	3.19717	0.138803	23.0339	182.589	142.11	115.564
FBgn0035947	4.76034	0.20689	23.0091	25.0679	45.674	35.9558
FBgn0038051	27.8068	1.20872	23.0052	0.181341	5.09793	0.0687472
FBgn0039293	2.90483	0.126318	22.9962	10.501	10.6275	15.2194
FBgn0037798	4.83398	0.210254	22.9911	32.7703	62.3133	44.04
FBgn0030460	3.63774	0.158258	22.9862	18.5118	17.8085	30.8928
FBgn0085345	17.2222	0.749647	22.9737	0.72521	6.33821	0.38365
FBgn0037913	11.5783	0.504035	22.9712	405.866	216.803	74.9825
FBgn0051365	3.08039	0.134147	22.9628	11.0925	15.7057	14.9331
FBgn0037341	1.75793	0.0765811	22.9551	53.7754	63.013	71.1918
FBgn0036680	25.1256	1.09458	22.9547	1.7089	1.28182	0.0706484
FBgn0053098	10.1122	0.440553	22.9534	1.33507	6.55311	1.87017
FBgn0040609	31.159	1.3582	22.9413	22.7357	48.739	0.776741
FBgn0033683	10.8468	0.472895	22.9369	16.595	4.10007	5.25007
FBgn0029778	3.17599	0.138493	22.9324	14.9197	14.4631	22.4818
FBgn0036698	13.8409	0.603666	22.9281	1.20163	1.38375	0.233965
FBgn0029814	2.25029	0.0982912	22.8941	455.998	662.287	535.438
FBgn0262035	5.30207	0.231885	22.8651	3.86009	9.9848	5.63076
FBgn0025700	2.96836	0.129938	22.8444	65.6958	95.6469	86.8657
FBgn0039299	50.5272	2.21272	22.8349	0	0	1.99687
FBgn0022213	3.69079	0.161799	22.811	14.9921	13.1255	23.4403
FBgn0032058	24.6907	1.08545	22.7469	0.150208	5.09629	0.441714
FBgn0033886	2.0217	0.0889362	22.7321	71.1835	79.2239	97.365
FBgn0030686	3.21191	0.141297	22.7316	50.9857	57.1374	79.4931
FBgn0015399	4.72365	0.207864	22.7247	125.352	66.1203	127.588
FBgn0031987	5.32317	0.234665	22.6841	52.9114	41.1617	24.6433
FBgn0001202	2.90771	0.128207	22.6797	157.305	197.473	215.696
FBgn0034958	1.94445	0.0857387	22.6788	227.32	275.999	277.628
FBgn0032486	7.00515	0.308956	22.6736	15.4627	27.5116	38.9556
FBgn0083962	7.31262	0.322694	22.6611	58.9204	123.869	129.799
FBgn0085261	14.3378	0.632759	22.6591	9.06764	6.50743	1.20385
FBgn0039877	4.3076	0.190119	22.6574	7.81243	10.3018	5.12791
FBgn0035850	3.03119	0.133863	22.6441	77.4123	86.0188	114.197
FBgn0011211	2.85947	0.126396	22.623	1269.31	1451.45	1920.3
FBgn0260941	4.01457	0.177672	22.5954	75.2766	114.513	128.77
FBgn0031881	3.77949	0.167311	22.5896	8.47081	10.6562	14.3247
FBgn0031865	11.6221	0.514522	22.5882	4.12878	2.46992	0.926849
FBgn0010786	3.16051	0.139979	22.5784	108.535	136.644	83.1922
FBgn0038535	2.61105	0.11565	22.5771	79.2337	88.54	109.133
FBgn0035246	2.91205	0.129059	22.5637	523.289	658.109	766.699
FBgn0039404	4.77819	0.211786	22.5614	18.2478	29.5547	33.7447
FBgn0283681	3.07059	0.136214	22.5424	10.657	11.2109	16.1939
FBgn0038647	40.0648	1.77938	22.5162	0.408909	97.6275	2.16527
FBgn0038065	2.36142	0.104937	22.5032	131.665	124.577	178.342
FBgn0038584	7.65736	0.340376	22.4968	8.97023	10.3131	21.8465
FBgn0026263	7.61239	0.338423	22.4937	13.6185	20.2302	39.059
FBgn0265190	2.66595	0.118619	22.4749	34.4365	44.4764	47.8306
FBgn0035151	24.946	1.11177	22.4381	0.493635	7.24563	5.48706
FBgn0001291	2.709	0.120763	22.4324	51.1191	42.9536	69.1721
FBgn0028538	2.3708	0.105716	22.4261	38.0557	44.9323	53.0963
[truncated: 6,557 more rows]
